# Supplementary material for: Mapping variants in thyroid hormone transporter MCT8 to disease severity by genomic, phenotypic, functional, structural and deep learning integration
Source: Springer Nature journal article supplement (doi:10.1038/s41467-025-56628-w), 2025-03-12
Supplement: MOESM1 [file 41467_2025_56628_MOESM1_ESM.pdf]

**Supplementary Information to 'Mapping variants in thyroid hormone transporter MCT8 to disease severity by genomic, phenotypic, functional, structural and deep learning integration'.**

**Complete author list**

**Supplementary Note 1**

**Supplementary Tables**

**Supplementary Figures**

**References**

**Full (uncropped) immunoblots**

## Complete author list

Stefan Groeneweg\*, Ferdy S. van Geest\*, Mariano Martín#, Mafalda Dias#, Jonathan Frazer#, M. Carolina M. Medina-Gomez#, Rosalie B.T.M. Sterenborg#, Hao Wang#, Anna Dolcetta-Capuzzo, Linda J. de Rooij, Alexander Teumer, Ayhan Abaci, Erica L.T. van den Akker, Gautam P. Ambegaonkar, Christine M. Armour, Iuliu Bacos, Priyanka Bakhtiani, Diana Barca, Andrew J. Bauer, Sjoerd A.A. van den Berg, Amanda van den Berge, Enrico Bertini, Ingrid M. van Beynum, Nicola Bruntetti-Pierri, Doris Brunner, Marco Cappa, Gerarda Cappuccio, Barbara Castellotti, Claudia Castiglioni, Krishna Chatterjee, Alexander Chesover, Peter Christian, Jet Coenen - van der Spek, Irenaeus F.M. de Coo, Regis Coutant, Dana Craiu, Patricia Crock, Christian DeGoede, Korcan Demir, Cheyenne Dewey, Alice Dica, Paul Dimitri, Marjolein H.G. Dremmen, Rachana Dubey, Anina Enderli, Jan Fairchild, Jonathan Gallichan, Luigi Garibaldi, Belinda George, Evelien F. Gevers, Erin Greenup, Annette Hackenberg, Zita Halász, Bianka Heinrich, Anna C. Hurst, Tony Huynh, Amber R. Isaza, Anna Klosowska, Marjo S. van der Knaap, Marieke M. van der Knoop, Daniel Konrad, David A. Koolen, Heiko Krude, Abhishek Kulkarni, Alexander Laemmle, Stephen H. LaFranchi, Amy Lawson-Yuen, Jan Lebl, Selmar Leeuwenburgh, Michaela Linder-Lucht, Anna López Martí, Cláudia F. Lorea, Charles M. Lourenço, Roelineke J. Lunsing, Greta Lyons, Jana Malikova, Edna E. Mancilla, Kenneth L. McCormick, Anne McGowan, Veronica Mericq, Felipe Monti Lora, Carla Moran, Katalin E. Muller, Lindsey E. Nicol, Isabelle Oliver-Petit, Laura Paone, Praveen G. Paul, Michel Polak, Francesco Porta, Fabiano O. Poswar, Christina Reinauer, Klara Rozenkova, Rowen Seckold, Tuba Seven Menevse, Peter Simm, Anna Simon, Yogen Singh, Marco Spada, Milou A.M. Stals, Merel T. Stegenga, Athanasia Stoupa, Gopinath M. Subramanian, Lilla Szeifert, Davide Tonduti, Serap Turan, Joel Vanderniet, Adri van der Walt, Jean-Louis Wémeau, Anne-Marie van Wermeskerken, Jolanta Wierzba, Marie-Claire Y. de Wit, Nicole I. Wolf, Michael Wurm, Federica Zibordi, Amnon Zung, Nitash Zwaveling-Soonawala, Fernando Rivadeneira, Marcel E. Meima, Debora S. Marks, Juan P. Nicola, Chi-Hua Chen, Marco Medici, W. Edward Visser

\*joint first authors, #joint second authors

## Supplementary Note 1

### Structural modeling

Unravelling the three-dimensional structure of integral membrane proteins has been proven to be a challenging procedure. Up to 2020, of the ~7100 human proteins with experimentally determined (partial) protein structure available, only 1260 were single-pass or multi-pass transmembrane proteins, covering ~18% of all integral membrane proteins <sup>1</sup>. Therefore, homology modeling of the membrane protein of interest has long been the most suitable alternative to gain structural insights.

MCT8 belongs to the Multi Facilitator Superfamily (MFS) of transporter proteins, and is thought to act according to the rocker-switch model. Rocker-switch proteins are made up of two helical bundles that contain a pseudo-2-fold symmetry axis that runs through the center of the transporter and perpendicular to the cell membrane <sup>2</sup>. During the transport cycle, the protein moves around the substrate molecule and thereby alternately exposing the substrate binding site to each side of the membrane.

Making advantage of the recently published cryo-EM structures of the human monocarboxylate transporters MCT1 and MCT2, we established novel homology models of MCT8 in outward-open and inward-open configuration, with overall z-scores of -0.590 and -0.771, respectively (Supplementary Fig. 16-18), which constitutes a significant improvement compared to previously available models <sup>3</sup>. Resulting models were compatible with observations from previously published *in vitro* studies, particularly those identifying residues accessible for chemical modification <sup>3, 4, 5</sup>. Although the exact orientation of residue sidechains should be inferred from homology models with some caution, key residues implied in substrate recognition (e.g. R445 and D498 – aligning to the critical residues R313 and F367 in human MCT1 <sup>6, 7</sup>) faced the substrate channel and formed hydrogen bonds with a T4 substrate molecule docked at the substrate binding center in outward-open conformation (Supplementary Fig. 18C). The bottom of the substrate binding center is predominantly composed by

aliphatic and aromatic residues (e.g. F189, F410, and Y409), that form a hydrophobic niche surrounding the inner and outer ring of T4. The aromatic ring of Y409 was moreover predicted to be alternately involved in a cation- $\pi$  interaction with the primary amine group of thyroid hormone, which also formed a hydrogen bond with D498. In addition to hydrophobic residues, the walls of the substrate pore are composed by several polar residues, including N193, S313, S314, and S317 that predominantly face the 5 and 5'iodine moieties. Following the current paradigm that MCTs translocate their substrates according to the rocker switch model, substrate interacting residues at the substrate binding center in outward-open and inward-open conformation were grossly the same (Supplementary Fig. 18D).

In order to explore if a common substrate interaction signature is present in thyroid hormone-interacting proteins, we compared the ligand-binding domains of human TR $\alpha$ , TR $\beta$  and the thyroid hormone binding protein mu-Crystallin, which have all been crystallized over the past decades, with the architecture of the predicted substrate binding center of MCT8 (Supplementary Fig. 19A-D). All three thyroid hormone interacting proteins contain an Arg residue at the substrate binding center that forms a hydrogen bond with the negatively charged carboxylic acid group of thyroid hormone, which corresponds to the role of R445 in MCT8. Like MCT8, a histidyl group interacts with the phenolic hydroxyl group and the outer ring of thyroid hormone in both TR $\alpha$  and TR $\beta$ . The importance of this interaction is illustrated by the functional impairment caused by variants affecting this His435 residue in TR $\beta$ , leading to a clinical phenotype of resistance to thyroid hormone (RTH) $\beta$ <sup>8</sup>. In mu-Crystallin such a His residue is lacking, which could be related to the position of the phenolic hydroxyl group just outside the substrate binding center causing exposure to the cytosolic environment. Similar to the predicted substrate binding center of MCT8, the vast majority of the substrate binding center of TR $\alpha$  and  $\beta$  is composed of aliphatic residues that form hydrophobic interactions with the inner and outer ring of thyroid hormone. Distortion of these hydrophobic niches, as is for example the case in the TR $\alpha$  M256T variant<sup>9</sup> and TR $\beta$  L341V variant<sup>10</sup>, has been previously shown to interfere with T3-signaling, suggesting that at least in TRs the exact composition of these hydrophobic niches is important for



proper substrate binding and/or recognition. Taken together, it appears that the presence of a positively charged Arg residue near the carboxylic acid group of thyroid hormone, as well as the presence of hydrophobic niches enclosing the inner and outer ring are mandatory features to allow thyroid hormone recognition. It is conceivable that the architecture of the pockets accommodating the iodine moieties is also a critical factor, although it is currently unknown if the iodine moieties are involved in specific interactions that are required for proper substrate recognition and binding.

As a complementary approach, a structural model of MCT8 in outward-open configuration was derived from the AlphaFold2 server <sup>11</sup>. Although the overall z-score of the AlphaFold model was -0.100 and therewith outperformed the outward-open model constructed with classical homology modeling in YASARA (Supplementary Fig. 20A and B), it was not fully compatible with the available *in vitro* data. In particular, the side-chain of H192 in the AlphaFold model does not flank the substrate pore and is therefore not accessible for chemical modification or interaction with the phenolic-hydroxyl group of T4 as has been suggested by previous functional studies (Supplementary Fig. 20C and D) <sup>4</sup>. This discrepancy may be inherent to the poor conservation of this His-residue across species and among the MCT-family. The higher Z-score of the AlphaFold model was mainly driven by a superior 3D packaging of the proposed intracellular N- and C-terminal domains, as well as the intra- and extracellular loop structures, whereas differences in the TMDs were less apparent, or even in favor of the YASARA model (Supplementary Fig. 20E). Indeed, trimming of the N- and C-terminus already improved the Z-score of the YASARA model up to -0.330, which approximates the model quality of an average high-resolution X-ray structure. These observations suggest that in particular the loop structures and large intracellular domains are intrinsically disordered or unstructured, which is reflected by the high RMSD of residues within these domains ( $11.06 \pm 8.33$ ), and relatively low RMSD for residues within the predicted TMDs ( $3.76 \pm 1.94$ ) when comparing the YASARA and AlphaFold2 structures (Supplementary Fig. 20F). A similar RMSD profile was observed after 2ns simulation of the YASARA-derived model (Supplementary Fig. 20G). The RMSD of individual residues indeed strongly correlates with the distance of the involved residue to the center of the substrate binding center

(Supplementary Fig. 20H), corroborating that residues located in the loop regions have a lower degree of structural organization. In line, such residues were found to be relatively less well conserved among species (Supplementary Fig. 20I) and within the MCT protein family (Supplementary Fig. 20J). Moreover, these intra- and extracellular domains had a relatively low predictive accuracy in both models.

As the YASARA-derived model was most compatible with the available experimental data, this model was used to inform on the impact of variants on MCT8 structure.

## **Identifying functional residues through systematic alanine scanning mutagenesis**

Alanine scanning mutagenesis is a widely used technique employed to identify functionally important residues of proteins. We systematically investigated the effects of alanine substitutions in MCT8 with T3 and T4 transport studies to identify critical regions within the protein and gain insights into the mechanism by which MCT8 transports its substrate(s). Informed by our structural models and previous functional studies, Ala scanning was restricted to the TMDs and their connecting intracellular and extracellular loops, as the large intracellular N- and C-termini likely have a low degree of structural organisation and had no functional significance in our experimental system<sup>12, 13</sup>. Hence, we generated 375 alanine variants (including 21 alanine blocks and 1 Ala variant identified in a patient with MCT8 deficiency), covering 61% of the entire MCT8 protein (66% of non-alanine residues) and 100% of non-alanine residues in the selected region.

We defined the individual alanine variants as severe (<10% transport function compared to WT), moderate (10-40% transport function compared to WT), or mild (40-70% transport function compared to WT) loss of function (LoF) variants. Definition of these cutoffs was guided by the residual transport

capacity of known pathogenic variants, identified in individuals with clinical features of MCT8 deficiency. Specifically, severe LoF in the alanine scanning corresponds to severe and moderate LoF variants in the genotype-phenotype analyses. Moderate LoF in the alanine scanning corresponds to all other (mild) LoF variants in the genotype-phenotype analyses; with 36% residual uptake as the highest residual T4 uptake in patient variants expressed in JEG3 cells, a 40% as upper limit was used. Mild LoF in the alanine scanning was defined as 40% to 70%; an upper limit of 70% allows for a robust detection from WT function. These studies revealed that 3% (11/375) of Ala variants had severe impact on MCT8 function, whereas 5% (20/375) had moderate and 15% (55/375) had mild impact on MCT8 function (Fig. 3A; Supplementary Fig. 13A). Most of the inactivating Ala variants were located along the substrate channel or were (in)directly involved in the orientation of side-chains that flank the substrate channel (Fig. 3B; Supplementary Fig. 13B; 21A). Functionally important residues (i.e. residues of which the Ala substituent had <70% residual transport activity compared to WT) could be categorized into seven different functional groups (Fig. 3C, Supplementary Fig. 21B): 1) residues located at the substrate binding center, 2) residues flanking the substrate channel outside the substrate binding center with potential gating function, 3) residues that support the structure of (critical parts of) the substrate channel, 4) residues within cluster 1 composed of the first part of TMD5 and the second part of TMD8, 5) residues within cluster 2 composed of the second part of TMD2 and the first part of TMD11, 6) residues within a “linker region” connecting cluster 1 and cluster 2 with potential substrate-interacting residues, 7) a residual group that mostly contains residues involved in maintenance of a) helix structure (i.e. Gly and Pro), or b) provide structural support for functionally important residues in group 4-6. Ala substitutions of almost all residues within TMD3, 6, 9, and 12 were well-tolerated, which is in line with the general assumption that these TMDs form contacts with the lipid bilayer and that, as a consequence, the preservation of hydrophobicity might be more relevant than the exact side-chain composition. Indeed, of the 67 different missense variants identified in patients with MCT8 deficiency, only 11 (16.4%) affect residues within these TMDs. Moreover, 6 (55.0%) out of these 11 variants were classified as mild, 2 (18.0%) out of 11 as moderate, and 3 (27.0%) out of 11 as severe LoF variants, with

the latter three variants (i.e. G251E, L471R and G564R) causing major changes in amino acid properties and introducing side-chains that are poorly compatible with a hydrophobic membrane environment (Fig. 3I).

### **Group 1: Critical residues identified at the substrate binding center**

The first group constitutes residues located at the proposed substrate binding center (i.e.  $<4 \text{ \AA}$  from the substrate molecule, docked at the deepest point of the substrate channel). In line with experimentally determined structures of other MFS-members (reviewed in e.g. <sup>2, 14, 15</sup>), the substrate binding center of MCT8 is mainly composed of TMD1, 4, 7, and 10. Of the 16 residues located at the substrate binding center, only the substitutions of F189 (TMD1), S314 (TMD5), F501 and I502 (TMD10) by an Ala were tolerated, whereas all other Ala substituents caused a functional reduction (Supplementary Fig. 21C-E). This was most prominent for those residues that are predicted to form electrostatic interactions with thyroid hormone. In particular the D498A and R445A variants resulted in (near-) complete inactivation of MCT8-mediated thyroid hormone transport, which is in line with previous studies <sup>16, 17, 18</sup>. The R445 residue, located within TMD8, is strongly conserved within the MCT family. Also in MCT1, used as a template for our structural model(s), the corresponding R313 residue is critical for the transport of its substrates <sup>6, 7, 15</sup>, and mutation of which to a Gln has been associated with clinical features of MCT1 deficiency <sup>19</sup>. In MCT8, the  $\eta$ -amino groups of R445 may form a (transient) hydrogen-bond with the carboxyl group of T3 and T4, which was also suggested by previous homology models <sup>3, 17, 18</sup>. Despite D498 (TMD10) not being conserved among MCTs, its corresponding residue in MCT1, F367, is critical for MCT1 function and implied in substrate selection <sup>15</sup>. As in our previous model in outward-open conformation <sup>3</sup>, during molecular dynamic simulations in absence of substrate molecules, a (transient) hydrogen bond between a  $\eta$ -NH<sub>2</sub> group of R445 and the  $\gamma$ -COOH group of D498 was observed, whereas this interaction was absent in the presence of substrate. Although data from molecular simulations should be interpreted with caution, this may suggest that the presence of a substrate molecule disrupts this hydrogen bond and thereby allows local

conformational changes required for substrate translocation. In line with Groeneweg et al <sup>4</sup>, loss of the imidazole-group of H192 and, therewith, the proposed hydrogen bond with the phenolic hydroxyl group of substrate <sup>3, 17, 18</sup>, reduced thyroid hormone uptake by up to 40% (Supplementary Fig. 21E). Other members of the MFS, including GlpT (R45) and FucP (N45) contain residues at the corresponding position that are implied in substrate interaction <sup>20, 21, 22</sup>, supporting an important role for residues at this location in TMD1 in at least several MFS-members. The solvent accessibility of the H192 was previously confirmed by chemical modification studies with the His-reactive compound diethylpyrocarbonate (DEPC) <sup>4</sup>.

Substitution of G196 (TMD1) and G499 (TMD10) by an Ala resulted in a moderate LoF, potentially through local loss of backbone flexibility. This could interfere with the orientation of their neighbouring substrate-interacting residues (e.g. H192 and D498, respectively), or potential gating residues that prevent the substrate from exiting the substrate binding center once bound. Elongation of their side-chains may moreover pose structural interference with either the substrate molecule or other residues facing the substrate channel. Loss of the aromatic residues F229 (TMD2), Y409 (TMD7), F410 (TMD7) all resulted in a mild-moderate functional reduction, which was also observed upon the reduction of the side-chain length of the aliphatic residues V414 (TMD7), L434 (TMD8), and M225 (TMD2) in their corresponding Ala variants. These variants likely alter the shape of the hydrophobic niche accommodating the inner and outer ring as well as the iodine moieties.

Besides the charged residues R445 and D498, substitution of N193 in TMD1 by an Ala had a major impact on T4 transport, whereas the transport of T3 was only mildly affected (Supplementary Fig. 21F). These findings suggested a particular role for this residue in the recognition and/or translocation of T4 along the substrate channel, with a potential involvement of the C5'-iodine moiety. To further pinpoint the function of the N193 residue, we generated expression constructs in which N193 was substituted by an Ile (loss of amide and similar size) in addition to the Ala substituent (loss of the amide side-chain and smaller size). Both variants were effectively expressed at the cell membrane (Supplementary Fig.

21I), but severely reduced MCT8-mediated T4 uptake, whereas T3 uptake was clearly less affected (Supplementary Fig. 18F). Both N193 mutants reduced the apparent affinity for T3, indicated by 2-3-times higher  $K_m$  values than WT (Supplementary Fig. 18G,H). In case of N193A, this was accompanied by a 2-times increase in  $V_{max}$  over WT, suggesting that the reduced affinity of this variant has a favorable effect on the (maximum) transport rate of T3. By contrast, the increased apparent  $K_m$  for T4 was accompanied by a decrease in apparent  $V_{max}$  for both mutants. The lower affinity of both mutants for T4 may thus have unfavorable effects on T4 transport rate. To further understand the role of N193 in the transport cycle, we combined substrate docking and molecular morphing to construct the trajectory of T4 through the substrate pore. Just before entering the substrate binding center, the distance and angle between the side-chain oxygen of N193 and C5-iodine of T4 allows the formation of a transient halogen bond (Supplementary Fig. 21J) <sup>23</sup>. Simultaneously, the distance and orientation of the C5'-iodine allows the formation of second halogen bond to the side-chain nitrogen of N193, which appears particularly important in fine-tuning the orientation of the large outer ring of T4 (Supplementary Fig. 21J). To further support that loss of N193 has the greatest impact on the transport of substrates with a fully saturated outer ring, we also studied the direct uptake of 3,3',5'-triiodothyronine (rT3) and 3,3'-diodothyronine (T2) (Fig. 3F; Supplementary Fig. 21F). Indeed, the effect of the N193A variant on 3,3'-T2 uptake was smaller than that on T4 uptake, whereas an intermediate effect was observed for rT3. Notably, N193 aligns to K38 in hMCT1, which has been implied in the recognition and binding of lactate by MCT1 <sup>15</sup>.

Together, these data support the concept that electrostatic interactions with the amine and carboxylic acid moieties of the alanine side-chain of thyroid hormone, as well as the phenolic hydroxyl group are key determinants in substrate recognition and translocation. Extending on previous studies on MCT8 (and other members of the MFS), these data also indicate that the exact composition of the hydrophobic niches accommodating the inner and outer ring with their iodine moieties importantly determine transport efficacy <sup>3,24</sup>. In particular the N193 may exert a specific role in positioning the C5'- and, to a lesser extent, the C5-iodine moiety of T4, possibly due to the formation of halogen bond(s).

## **Group 2: residues flanking the substrate channel outside the substrate binding center**

The second group of functional residues constitutes those residues that are not directly located at the substrate binding center, but do flank the substrate channel at other sites in the outward-open conformation (Supplementary Fig. 22A). The critical residues in this category are exposed to the extracellular environment and are located within the second part of TMD1 (I197, Y199, L203), TMD7 (Y413, L416) and the first part of TMD8 (L433, I437, S441), and TMD10 (L494) (Supplementary Fig. 22B-C). It is conceivable that these residues help improving the orientation of the substrate molecule before entering the substrate binding center through either direct or indirect interactions with the substrate molecule, or have an important gating function once the substrate is localized at the substrate binding center.

## **Group 3: critical residues (indirectly) supporting structure of substrate channel**

The third group of residues may determine the orientation of substrate-interacting residues classified to group 1 and 2 and thereby (indirectly) determine the shape of the substrate channel (Supplementary Fig. 22D). This group of residues include residues that 1) potentially determine the helical structure of the TMDs composing the substrate binding center (e.g. G186, TMD1; G495, TMD10) (Supplementary Fig. 22E) or 2) their relative position to other TMDs (e.g. I188 and I191, L198 TMD1) (Supplementary Fig. 22F), or 3) residues located in other TMDs, providing structural support to the TMDs that form the substrate binding center, exemplified by L259 (TMD3), F316, F320, F324 (TMD5), L340 (TMD6), L487 (TMD10), M533 (TMD11), F554 (TMD12) and most prominently by a series of residues within the first part of TMD4 (Supplementary Fig 22G and H). Several residues within the first half of TMD4 interact with G196, I188 and I191, as well as with several substrate-interacting residues within TMD1 and TMD2. Ala substitution of these residues within TMD4 resulted in moderate (R271, F279, G280), or mild (L268, S269, Y275, G282, C283) LoF (Supplementary Fig 22I). These residues presumably provide direct support to the orientation of substrate-interacting residues and determine the relative position of TMD1 and TMD2 and thereby the shape of the substrate channel. Notably, Ala substituents of

residues within TMD4 that have side-chains pointing away from TMD1 and TMD2 are generally well-tolerated.

#### **Group 4: residues within cluster 1 (TMD5 and TMD8)**

The fourth group concerns a cluster of critical residues within the first part of TMD5 (R301-A311, with critical residues: L302, G303, L304, G307, V309) and second part of TMD8 (R445-D453, with critical residues: L446, G449, S452, D453), and their flanking intracellular loops (Supplementary Fig 23A-C). In MFS-transporters, TMD5 and TMD8 (as well as TMD2 and TMD11, see next section) are generally termed rocker-helices, to indicate the fact that they are directly involved in inter-domain conformational changes. Indeed in outward-open conformation, critical residues within this cluster form extensive hydrophobic and electrostatic interactions between TMD5 and TMD8, and therewith determine the relative position of the N-terminal and C-terminal half of the MCT8 protein (Supplementary Fig. 23B). Notably, Ala substituents of residues within this part of TMD5 and TMD8 not involved in the interactions between both TMDs, but rather face the lipid bilayer, are well-tolerated (Supplementary Fig. 23C).

Exemplary, critical residues D453 and R301 are predicted to form a salt bridge, that is perturbed once MCT8 is in inward-open conformation (Supplementary Fig. 23D-E). Whereas substitution of either one of these residues by an Ala results in (near-) complete inactivation of T4 transport, substitution of Arg301 by a positively charged Lys restored T4 transport to 80.5% of WT (Supplementary Fig. 23F). By contrast, all tested substitutions of D453, including the D453E and D453N, resulted in (near-)complete inactivation, suggesting that in addition to its negative charge, the exact side-chain length of D453 is also crucial (Supplementary Fig. 5 and 23F). As cluster 1 is in close structural proximity of, and in direct contact with the substrate-interacting residue R445, we hypothesize that interactions within this cluster may be influenced by the presence of substrate and could therefore be part of the mechanism involved in the establishment of substrate-induced conformational changes.

#### **Group 5: residues within cluster 2 (TMD2 and TMD11)**



A similar cluster appears to be present within the second part of TMD2 (M225-I234 with critical residues: t225, G226, F229, P233) and TMD11 (S519-A530 with critical residues: S519, I522, L526, G527, M529), that mirrors TMD5 and TMD8 at the other side of the protein (Supplementary Fig. 23G-I). Critical residues within this pair of rocker-helices also form extensive hydrophobic interactions that likely determine the position of TMD2 within the N-terminal half of the protein in relation to TMD11 within the C-terminal half of the protein. Indeed, in inward-open conformation interactions between the most intracellularly located residues in both TMDs are perturbed (Supplementary Fig. 23J-K). One of the residues that might be of particular importance in linking both TMDs is I522, substitution of which by an Ala resulted in moderate reduction of uptake function (Supplementary Fig. 23L). Preservation of the branched-chain aliphatic properties in the Ile522Leu variant resulted in a fully active transporter (Supplementary Fig. 23L). Again, Ala substituents of residues within TMD2 and TMD11 not involved in the interactions between both TMDs are well-tolerated. As for R445 in cluster 1, Met225 forms extensive interactions with the substrate molecule, and therefore interactions within this second pair of rocker-helices may also be influenced by the presence of substrate.

#### **Group 6: linker region composed of residues within TMD4, ICL2, and TMD10**

The sixth group of critical residues is located in the center of the protein and entails the second half of TMD4 (residues: F287-G295), intracellular loop 2 that connects TMD4 and 5 (residues H296–R301), as well as the second half of TMD10 (M505-F510). These residues are located in close structural proximity, below the level of substrate binding pocket, and are, as such, not accessible from the extracellular side of the transporter (Supplementary Fig. 24A and B). Almost all residues within this part of TMD4, ICL2, and TMD10 are important to MCT8 function as their Ala substituents cause severe (Y297, F298), moderate (R301, F287, F510), or mild (Q288, P289, L291, L294, M505, P507) LoF (Supplementary Fig. 24C). We postulate that this group of residues has at least two important functions. Firstly, in outward-open conformation, these residues may form a “linker region” between both pairs of rocker helices and therewith orchestrate a coordinated conformational change of the transporter in presence of

substrate, a process that might be further guided by the potential interactions of the first part of TMD4 with substrate-interacting residues (Supplementary Fig. 22H). Secondly, the linker region itself, as well as previously indicated residues within both rocker helices, are exposed to the proposed substrate channel in the inward-open conformation (Supplementary Fig. 24D-F), and may therefore play a direct role in propelling the substrate molecule from the substrate binding pocket to the intracellular end of the substrate channel.

A role of this linker region in substrate selection and transition through the substrate channel is supported by studies of Johannes *et al*<sup>24</sup>, showing that Y184, corresponding to F287 in MCT8, is a key determinant of the substrate pocket size of MCT10 and is one of the residues that prevents MCT10 from transporting T4 efficiently. The authors suggest that alteration of the side-chain length at this position may change the size of the substrate pocket, and therewith exclude T4 as a prime substrate.

Particularly Y297 and F298 might be of particular importance to stabilize the structure of the linker region, as their Ala substitutions resulted in (near-)complete functional inactivation and strong reduction of (membrane) expression of the respective mutant MCT8 proteins. Particularly the aromatic moieties of both residues are likely to exert critical functions, potentially by forming a multitude of interactions, as maintenance of these aromatic properties in the Y297F and F298Y variants, respectively, preserved full MCT8 function (Supplementary Fig. 24G-L). It appears that this structural feature is strongly conserved among species and among members of the MCT family (Supplementary Fig. 15).

#### **Group 7: residual group**

The final group constitutes a residual group with residues that are dispersed throughout the MCT8 protein and may be involved in 1) maintenance of overall protein structure, such as Gly and Pro residues (Supplementary Fig. 25A), 2) interactions with other functional domains within MCT8 (i.e. group 4-6) (Supplementary Fig. 25B), or 3) determining loop conformation (Supplementary Fig. 25C).

Firstly, by increasing backbone flexibility, Gly residues allow dynamic changes within and between helical bundles. In addition to the Gly residues that are part of group 1-6, Ala substituents of G251 (TMD3) and G536 (TMD11) resulted in severe LoF, of G243 (ICL1) in moderate LoF, and of G171 (N-terminus) and G548 (ECL6) in mild LoF (Supplementary Fig. 25A and D). Except for G548, these Gly residues are highly conserved across species and within the MCT family, suggesting a common structural function (Supplementary Fig. 15). Another residue that greatly impacts helical structure is Pro, which typically functions as a helix-breaker. Loss of this unique characteristic in case of Ala substitution of P532 and P538, both located in TMD11, result in moderate LoF (Supplementary Fig. 25A and D).

Secondly, several residues that are located in close structural proximity of the “linker region” or cluster 1 showed mild-moderate LoF upon substitution by Ala (Supplementary Fig. 25B and D). Within TMD9, Q464 and K470 are interacting with residues within TMD10 that belong to the linker region. The same Lys470 residues also interacts with cluster 1 residues, as is the case for F500 (TMD10) and W175 (TMD1). Glu170, located at the border of the intracellular N-terminus and TMD1, also interacts with TMD4/ICL2 of the linker region. Based on its location, the E170 residue might also be important for the correct determination of TMD topology.

Thirdly, substitution of some residues located within the intracellular or extracellular loops to an Ala showed mild LoF, including F547 and D549 in ECL6 (Supplementary Fig. 25C and D). To exclude that any other potentially critical residues within intra- or extracellular loops were missed by focussing our mutational approach on the TMDs, up to 26 so-called Ala-blocks were generated in which several consecutive residues were substituted by an Ala in the same expression construct. However, only 6 out of 26 so-called Ala-blocks showed pronounced LoF (Supplemental Fig. 26). In case an Ala-block showed >50% functional reduction, individual Ala variants were tested. Importantly, only substitution of G243 and I478 resulted in significant LoF, whereas all other individual loop variants were well-

tolerated. This may suggest that the involved loop domains (i.e. ICL1, ECL4, ECL5, ICL5) may harbour functions critical to MCT8 – although the exact composition tolerates some variation.

From a structural perspective, it is unclear why Ala substitution of particularly Y354 and M476 (severe), but also S269 and Y462 (mild), result in LoF. Variants affecting Y354 (i.e. Y354C) have also been identified in patients with MCT8 deficiency, supporting that this residue might indeed be critical to MCT8 function. In depth mutational studies, also shown in Supplementary Fig. 25E, indicated that the aromatic features of Y354 are of importance, as substitution by a Phe restored T4 transport to WT levels. As Y354C greatly diminished MCT8 protein expression levels (Supplementary Fig. 5), as well as membrane expression levels (Supplementary Fig. 25F), we postulate that Y354 has a critical role in maintaining protein stability. This is supported by the extensive interactions Y354 forms with residues in surrounding TMDs (Supplementary Fig. 5).

## **Delineating pathogenic mechanisms of missense variants in MCT8 deficiency**

Having identified the critical residues of the MCT8 protein, we next employed further functional studies to delineate the underlying pathogenic mechanism of missense variants identified in MCT8 deficiency. T3 and T4 transport function, as well as total and cell surface MCT8 protein expression levels were determined for all identified missense variants in transiently transfected cells. Next, the information obtained from the Ala scanning was employed to determine whether the loss of the original residue was the major pathogenic determinant of the variant, or the introduction of an unfavorable alternate residue. Third, in case the Ala variant was also pathogenic, the original residue was either changed into a residue with similar properties, and/or its equivalent in the highly homologous transporter MCT10, in order to pinpoint what property of the original residue was vital for MCT8 function. Finally, the findings were interpreted in the context of the novel MCT8 homology models, cross-species and cross-family conservation analyses, as well as previously reported functional

studies involving MCT family members. A summary of these results is provided in Supplementary Table 6, and Supplementary Fig. 5.

From the 67 different pathogenic missense variants, 5 variants affected an original Ala residue and 1 was a combined missense variant (L487R+V489D). Out of the remaining 61 pathogenic missense variants, 33 variants affected critical residues (i.e. residues of which the Ala substituent resulted in significant functional reduction) at 25 different positions. Eleven out of these 25 original residues concerned Gly or Pro residues, substitution of which presumably causing loss of the unique structural properties of both residues. Complementary mutational screening elucidated the key property/properties of 13 out of 14 of the remaining affected critical residues. For example, replacement of D498 by Asn (patient-derived mutation) or Ala both abolished thyroid hormone transport, while substitution by Glu (having similar charge as Asp) did not affect function (Fig. 3I, Supplementary Fig. 5). Similarly, substitution of R445 by an Ser, Leu, Asp, Cys or Ala resulted in substantial loss of function, whereas substitution by Lys (having similar charge) was relatively well tolerated (Supplementary Fig. 5).

As a corollary, 28 out of 61 pathogenic variants affected non-critical residues, and therefore the introduction of an unfavorable residue is likely to cause loss of function. Indeed, 26 out of 28 variants showed reduced total and/or membrane expression levels (<70% of WT levels), suggesting interference of the variant with proper protein stability and/or membrane trafficking. For example, substitution of C283 by a Tyr strongly reduced MCT8 expression levels. Structural modelling indeed suggests that this variant greatly distorts the helical structure of TMD4 (Fig. 3I, Supplementary Fig. 5). The two variants that retained normal (membrane) expression were S232F and L471R. Both variants increase side-chain size, which may cause steric clashes with residues predicted to flank the substrate channel and thereby (in)directly hamper substrate passage (Supplementary Fig. 5).

## Supplementary Tables

| <b>Supplementary Table 1. Demographic characteristics</b>                                                                                                                                                                                                                                                                                                                 |                         |                                                 |                      |
|---------------------------------------------------------------------------------------------------------------------------------------------------------------------------------------------------------------------------------------------------------------------------------------------------------------------------------------------------------------------------|-------------------------|-------------------------------------------------|----------------------|
|                                                                                                                                                                                                                                                                                                                                                                           | <b>Reference cohort</b> | <b>Literature and newly identified patients</b> | <b>Meta-analysis</b> |
| <b>Characteristic</b>                                                                                                                                                                                                                                                                                                                                                     | <b>N=151</b>            | <b>N=220</b>                                    | <b>N=371</b>         |
| <b>Age at last follow-up (years)</b>                                                                                                                                                                                                                                                                                                                                      | 9.1 (1.0 to 71.0)       | 7.3 (0.3-76.0)                                  | 8.7 (3.5-17.8)       |
| <b>Age composition</b>                                                                                                                                                                                                                                                                                                                                                    |                         |                                                 |                      |
| <4 years                                                                                                                                                                                                                                                                                                                                                                  | 27 (18.6%)              | 74 (37.0%)                                      | 101 (29.3%)          |
| 4-10 years                                                                                                                                                                                                                                                                                                                                                                | 57 (39.3%)              | 44 (22.0%)                                      | 101 (29.3%)          |
| 11-17 years                                                                                                                                                                                                                                                                                                                                                               | 35 (24.1%)              | 24 (12.0%)                                      | 59 (17.1%)           |
| Adults (≥18 years)                                                                                                                                                                                                                                                                                                                                                        | 26 (17.9%)              | 58 (29.0%)                                      | 84 (24.3%)           |
| <b>Sex</b>                                                                                                                                                                                                                                                                                                                                                                |                         |                                                 |                      |
| Female                                                                                                                                                                                                                                                                                                                                                                    | 0                       | 0                                               | 0                    |
| Male                                                                                                                                                                                                                                                                                                                                                                      | 151 (100%)              | 220 (100%)                                      | 371 (100%)           |
| <b>Alive</b>                                                                                                                                                                                                                                                                                                                                                              | 119 (78.8%)             | 166 (75.5%)                                     | 284 (76.6%)          |
| <b>Ethnic origin</b>                                                                                                                                                                                                                                                                                                                                                      |                         |                                                 |                      |
| Caucasian                                                                                                                                                                                                                                                                                                                                                                 | 100 (71.9%)             | 31 (50.0%)                                      | 131 (65.2%)          |
| Middle-Eastern                                                                                                                                                                                                                                                                                                                                                            | 13 (9.4%)               | 1 (1.6%)                                        | 14 (7.0%)            |
| North-African                                                                                                                                                                                                                                                                                                                                                             | 7 (5.0%)                | 0 (0.0%)                                        | 7 (3.5%)             |
| South-American                                                                                                                                                                                                                                                                                                                                                            | 9 (6.5%)                | 13 (21.0%)                                      | 22 (10.9%)           |
| Asian                                                                                                                                                                                                                                                                                                                                                                     | 8 (5.8%)                | 7 (11.3%)                                       | 15 (7.5%)            |
| Other                                                                                                                                                                                                                                                                                                                                                                     | 2 (1.4%)                | 10 (16.1%)                                      | 12 (6.0%)            |
| <b>Race</b>                                                                                                                                                                                                                                                                                                                                                               |                         |                                                 |                      |
| White                                                                                                                                                                                                                                                                                                                                                                     | 120 (86.3)              | 34 (54.8%)                                      | 154 (76.6%)          |
| Other                                                                                                                                                                                                                                                                                                                                                                     | 19 (13.7)               | 28 (45.2%)                                      | 47 (23.4%)           |
| <b>Patients per country</b>                                                                                                                                                                                                                                                                                                                                               |                         |                                                 |                      |
| Australia                                                                                                                                                                                                                                                                                                                                                                 | 5 (3.3%)                |                                                 |                      |
| Belgium                                                                                                                                                                                                                                                                                                                                                                   | 3 (2.0%)                |                                                 |                      |
| Brazil                                                                                                                                                                                                                                                                                                                                                                    | 7 (4.6%)                |                                                 |                      |
| Canada                                                                                                                                                                                                                                                                                                                                                                    | 5 (3.3%)                |                                                 |                      |
| Chile                                                                                                                                                                                                                                                                                                                                                                     | 2 (1.3%)                |                                                 |                      |
| Czech Republic                                                                                                                                                                                                                                                                                                                                                            | 1 (0.7%)                |                                                 |                      |
| France                                                                                                                                                                                                                                                                                                                                                                    | 13 (8.6%)               |                                                 |                      |
| Germany                                                                                                                                                                                                                                                                                                                                                                   | 9 (6.0%)                |                                                 |                      |
| Hungary                                                                                                                                                                                                                                                                                                                                                                   | 3 (2.0%)                |                                                 |                      |
| India                                                                                                                                                                                                                                                                                                                                                                     | 8 (5.3%)                |                                                 |                      |
| Israel                                                                                                                                                                                                                                                                                                                                                                    | 4 (2.6%)                |                                                 |                      |
| Italy                                                                                                                                                                                                                                                                                                                                                                     | 21 (13.9%)              |                                                 |                      |
| Netherlands                                                                                                                                                                                                                                                                                                                                                               | 23 (15.2%)              |                                                 |                      |
| Poland                                                                                                                                                                                                                                                                                                                                                                    | 5 (3.3%)                |                                                 |                      |
| Romania                                                                                                                                                                                                                                                                                                                                                                   | 6 (4.0%)                |                                                 |                      |
| South-Africa                                                                                                                                                                                                                                                                                                                                                              | 1 (0.7 %)               |                                                 |                      |
| Spain                                                                                                                                                                                                                                                                                                                                                                     | 1 (0.7%)                |                                                 |                      |
| Sweden                                                                                                                                                                                                                                                                                                                                                                    | 2 (1.3%)                |                                                 |                      |
| Switzerland                                                                                                                                                                                                                                                                                                                                                               | 3 (2.0 %)               |                                                 |                      |
| Turkey                                                                                                                                                                                                                                                                                                                                                                    | 6 (4.0%)                |                                                 |                      |
| UK                                                                                                                                                                                                                                                                                                                                                                        | 18 (11.9%)              |                                                 |                      |
| USA                                                                                                                                                                                                                                                                                                                                                                       | 5 (3.3%)                |                                                 |                      |
| Data are median (range), or n (%). Demographic information of patients at the time they were enrolled in the cohort, based on available data. As country of origin is infrequently reported and cannot be accurately inferred by the affiliations of the authors – this parameter has not been included for patients identified through the systematic literature search. |                         |                                                 |                      |

**Supplementary Table 2.** In depth phenotyping of neurodevelopmental features.

|                                                  | Reference cohort <sup>25</sup> |    | Literature and newly identified patients |     | Meta-analysis    |     |
|--------------------------------------------------|--------------------------------|----|------------------------------------------|-----|------------------|-----|
|                                                  | N=151                          | N  | N=220                                    | N   | N=371            | N   |
| Age at assessment (years)                        | 4.8 (0.44-66.8)                | 86 | 6.00 (0.04-76.0)                         | 159 | 5.12 (0.04-76.0) | 270 |
| <b>Perinatal features</b>                        |                                |    |                                          |     |                  |     |
| Pregnancy duration (weeks)                       | 40.0 (32.0-42.3)               | 34 | 40.0 (35.0-42.0)                         | 47  | 40.0 (32.0-42.3) | 97  |
| Apgar scores >8 after 5 min                      | 15 (93.8%)                     | 16 | 16 (94.1%)                               | 17  | 35 (94.6%)       | 37  |
| Term birth weight (grams)                        | 3584 (±517)                    | 22 | 3390 (±553)                              | 36  | 3499 (±549)      | 69  |
| Microcephaly (<3 <sup>th</sup> centile) at birth | 2 (18.2%)                      | 11 | 3 (12.0%)                                | 25  | 6 (15.8%)        | 38  |
| <b>Neurological examination</b>                  |                                |    |                                          |     |                  |     |
| Hypotonia                                        | 72 (100.0%)                    | 72 | 139 (97.2%)                              | 143 | 239 (98.0%)      | 244 |
| Primitive reflexes (>1 present)                  | 51 (91.1%)                     | 56 | 10 (83.3%)                               | 12  | 63 (90.0%)       | 70  |
| Tonic neck reflex                                | 17 (81.0%)                     | 21 | 5 (83.3%)                                | 6   | 25 (83.3%)       | 30  |
| Glabellar sign                                   | 44 (80.0%)                     | 55 | 2 (66.7%)                                | 3   | 46 (79.3%)       | 58  |
| Startle response                                 | 17 (68.0%)                     | 25 | 6 (85.7%)                                | 7   | 24 (72.7%)       | 33  |
| Scoliosis (>8 years)                             | 15 (88.2%)                     | 17 | 24 (61.5%)                               | 39  | 42 (68.9%)       | 61  |
| Muscle hypoplasia                                | 43 (84.3%)                     | 51 | 71 (83.5%)                               | 85  | 132 (84.6%)      | 156 |
| Dystonia                                         | 57 (82.6%)                     | 69 | 86 (85.1%)                               | 101 | 167 (85.2%)      | 196 |
| Spasticity                                       | 57 (80.3%)                     | 71 | 141 (92.8%)                              | 152 | 226 (90.0%)      | 251 |
| Urinary / faecal incontinence (>4 years)         | 33 (80.5%)                     | 41 | 0 (0.0%)                                 | 2   | 33 (75.0%)       | 44  |
| Feeding problems                                 | 55 (71.4%)                     | 77 | 50 (80.6%)                               | 62  | 116 (75.8%)      | 153 |
| Hip dislocation (>8 years)                       | 10 (66.7%)                     | 15 | N/A                                      | N/A | 10 (66.7%)       | 15  |
| Plantar extension response (Babinski sign)       | 38 (66.7%)                     | 57 | 33 (78.6%)                               | 42  | 81 (73.0%)       | 111 |
| Delayed visual evoked potentials (<1 year)       | 3 (50.0%)                      | 6  | 1 (25.0%)                                | 4   | 5 (38.5%)        | 13  |
| Delayed visual evoked potentials (<1 year)       | 0 (0.0%)                       | 3  | 9 (56.3%)                                | 16  | 10 (43.5%)       | 23  |
| Sleep problems                                   | 20 (39.2%)                     | 51 | 6 (54.5%)                                | 11  | 33 (47.8%)       | 69  |
| Tube feeding                                     | 27 (35.5%)                     | 76 | 18 (47.4%)                               | 38  | 48 (39.0%)       | 123 |
| Strabismus                                       | 19 (35.2%)                     | 54 | 18 (66.7%)                               | 27  | 40 (44.9%)       | 89  |
| Microcephaly (<3 <sup>th</sup> centile)          | 19 (32.2%)                     | 59 | 20 (24.1%)                               | 83  | 44 (28.0%)       | 157 |
| Nystagmus                                        | 13 (26.5%)                     | 49 | 9 (12.2%)                                | 74  | 23 (17.2%)       | 134 |
| Extrapyramidal signs (other)                     | 7 (25.0%)                      | 28 | 47 (97.9%)                               | 48  | 78 (85.7%)       | 91  |
| Seizures (EEG proven)                            | 15 (23.1%)                     | 65 | 13 (12.4%)                               | 105 | 35 (18.6%)       | 188 |
| Apnoeosis                                        | 7 (21.9%)                      | 32 | 2 (10.5%)                                | 19  | 12 (21.8%)       | 55  |
| Abnormal hearing                                 | 1 (2.3%)                       | 44 | 3 (27.3%)                                | 11  | 4 (6.9%)         | 58  |
| <b>Development</b>                               |                                |    |                                          |     |                  |     |
| Head control                                     | 19 (24.7%)                     | 77 | 24 (20.1%)                               | 117 | 53 (23.0%)       | 228 |
| Speech (at least 1 word)                         | 5 (6.6%)                       | 76 | 33 (21.7%)                               | 150 | 44 (17.0%)       | 259 |
| Independent sitting                              | 6 (7.7%)                       | 78 | 17 (15.3%)                               | 111 | 29 (12.7%)       | 224 |
| Independent walking                              | 4 (5.2%)                       | 77 | 20 (13.4%)                               | 149 | 30 (11.3%)       | 261 |
| <b>MRI/MRS characteristics*</b>                  |                                |    |                                          |     |                  |     |
| Normal global anatomy                            | 13 (100%)                      | 13 | 9 (100.0%)                               | 9   | 22 (100.0%)      | 22  |
| Delayed myelination                              | 13 (100%)                      | 13 | 74 (91.4%)                               | 81  | 92 (90.2%)       | 102 |
| Reduced cerebral white matter volume             | 13 (100%)                      | 13 | 21 (87.5%)                               | 24  | 34 (91.9%)       | 37  |
| Periventricular white matter lesions             | 10 (100%)                      | 10 | 7 (70.0%)                                | 10  | 17 (85.0%)       | 20  |

|                                             |           |    |            |    |            |    |
|---------------------------------------------|-----------|----|------------|----|------------|----|
| Prominent supratentorial ventricular system | 13 (100%) | 13 | 18 (48.6%) | 37 | 33 (58.9%) | 56 |
| Prominent peripheral liquor spaces          | 13 (100%) | 13 | 16 (47.1%) | 34 | 31 (58.5%) | 53 |
| Low NAA peak                                | 6 (85.7%) | 7  | 3 (50.0%)  | 6  | 10 (71.4%) | 14 |
| High choline peak                           | 6 (85.7%) | 7  | 4 (66.7%)  | 6  | 11 (78.6%) | 14 |

**Data are median (range), n (%), or mean ( $\pm$ SD). Phenotyping of the neurological phenotype in indicated cohorts.**

**Please note that for the International MCT8 Deficiency Consortium cohort, only 86 patients with extensive available data were analyzed. In the meta-analysis, all (151) patients of the International MCT8 Deficiency Consortium cohort were included. Data from the International MCT8 Deficiency Consortium cohort study (reference cohort; <sup>25</sup>) have been updated for the meta-analysis.**

**\* MRI scans in the International MCT8 Deficiency Consortium cohort were centrally assessed as described before**

<sup>25</sup>.



**Supplementary Table 3.** In depth phenotyping of metabolic features.

|                                         | Reference cohort <sup>25</sup> |     | Literature and newly identified patients |     | Meta-analysis    |     |
|-----------------------------------------|--------------------------------|-----|------------------------------------------|-----|------------------|-----|
|                                         | N=151                          | N   | N=220                                    | N   | N=371            | N   |
| <b>Serum thyroid function tests</b>     |                                |     |                                          |     |                  |     |
| Age at measurement (years)              | 5.3 (0.44-66.8)                | 106 | 2.5 (0.04-62.0)                          | 80  | 4.4 (0.04-66.8)  | 190 |
| Elevated T3 concentrations              | 96 (95.1%)                     | 101 | 28 (87.5%)                               | 32  | 126 (93.3%)      | 135 |
| Reduced free T4 concentrations          | 94 (88.7%)                     | 106 | 76 (85.4%)                               | 89  | 174 (87.4%)      | 199 |
| <b>Deep phenotyping</b>                 |                                |     |                                          |     |                  |     |
| Age at assessment (years)               | 4.8 (0.44-66.8)                | 86  | 6.00 (0.04-76.0)                         | 159 | 5.12 (0.04-76.0) | 270 |
| <b>Biochemical measurements</b>         |                                |     |                                          |     |                  |     |
| Elevated sex hormone binding globulin   | 69 (88.5%)                     | 78  | 6 (66.7%)                                | 9   | 79 (86.8%)       | 91  |
| Elevated alanine aminotransferase       | 30 (46.2%)                     | 65  | 0 (0.0%)                                 | 1   | 30 (43.5%)       | 69  |
| Reduced creatinine                      | 22 (27.8%)                     | 79  | 0 (0.0%)                                 | 1   | 24 (28.9%)       | 83  |
| Elevated lactate                        | 3 (27.3%)                      | 11  | 5 (100.0%)                               | 5   | 8 (50.0%)        | 16  |
| Reduced total cholesterol               | 12 (18.5%)                     | 65  | 2 (100.0%)                               | 2   | 15 (21.4%)       | 70  |
| Elevated aspartate aminotransferase     | 11 (19.6%)                     | 56  | 0 (0.0%)                                 | 1   | 11 (18.3%)       | 60  |
| Elevated creatine kinase                | 3 (3.8%)                       | 79  | 1 (25.0%)                                | 4   | 4 (4.7%)         | 86  |
| <b>Clinical features</b>                |                                |     |                                          |     |                  |     |
| Low bone mineral density (>8 years)     | 5 (100%)                       | 5   | 0 (0.0%)                                 | 1   | 5 (83.3%)        | 6   |
| Gastro-esophageal reflux disease        | 38 (79.2%)                     | 48  | 13 (68.4%)                               | 19  | 58 (78.4%)       | 74  |
| Premature atrial complexes              | 34 (75.6%)                     | 45  | 0 (0.0%)                                 | 5   | 36 (67.9%)       | 53  |
| Recurrent (pulmonary) infections        | 29 (69.0%)                     | 42  | 14 (73.7%)                               | 19  | 50 (72.5%)       | 69  |
| Underweight (<-2 SD)                    | 59 (71.1%)                     | 83  | 56 (65.9%)                               | 85  | 140 (68.6%)      | 204 |
| Constipation                            | 37 (58.7%)                     | 63  | 5 (55.6%)                                | 9   | 44 (57.1%)       | 77  |
| Cryptorchidism                          | 9 (18.4%)                      | 49  | 17 (31.5%)                               | 54  | 29 (25.4%)       | 114 |
| Elevated systolic blood pressure        | 25 (53.2%)                     | 47  | 1 (10.0%)                                | 10  | 9 (15.3%)        | 59  |
| Elevated diastolic blood pressure       | 17 (36.2%)                     | 47  | 3 (30.0%)                                | 10  | 5 (8.5%)         | 59  |
| Increased perspiration                  | 29 (48.3%)                     | 60  | 5 (62.5%)                                | 8   | 35 (48.6%)       | 72  |
| Short stature (<-2 SD)                  | 27 (40.3%)                     | 67  | 22 (25.0%)                               | 88  | 53 (30.7%)       | 174 |
| Premature ventricular complexes         | 19 (42.2%)                     | 45  | 0 (0.0%)                                 | 7   | 19 (36.5%)       | 52  |
| Tachycardia in rest                     | 20 (31.3%)                     | 64  | 6 (27.3%)                                | 22  | 31 (32.6%)       | 95  |
| Aortic root dilatation                  | 7 (26.9%)                      | 26  | 1 (25.0%)                                | 4   | 8 (26.7%)        | 30  |
| Delayed sexual maturation (>8 years)    | 5 (26.3%)                      | 19  | N/A                                      | N/A | 5 (26.3%)        | 19  |
| Cardiac conduction abnormalities        | 9 (18.0%)                      | 50  | 0 (0.0%)                                 | 8   | 3 (5.2%)         | 58  |
| Prolonged QTc interval                  | 3 (7.7%)                       | 39  | N/A                                      | N/A | 3 (7.7%)         | 39  |
| Supraventricular tachycardia            | 2 (4.2%)                       | 48  | N/A                                      | N/A | 2 (4.2%)         | 48  |
| (Non-sustained) ventricular tachycardia | 2 (4.2%)                       | 48  | N/A                                      | N/A | 2 (4.2%)         | 48  |
| Atrial fibrillation                     | 1 (2.1%)                       | 48  | N/A                                      | N/A | 1 (2.1%)         | 48  |

---

Data are median (range), or n (%). Phenotyping of the peripheral phenotype in indicated cohorts. Please note that for the International MCT8 Deficiency Consortium cohort, only 86 patients with extensive available data were analyzed<sup>25</sup>. In the meta-analysis, all (151) patients of the International MCT8 Deficiency Consortium cohort were included. Data from the International MCT8 Deficiency Consortium cohort study have been updated for the meta-analysis.

---

**Supplementary Table 4. List of selected SNPs in SLC16A2.**

|     |       | Allele<br>Count | Allele<br>frequency | Homo-<br>zygous | Hemizygous<br>males | Polyphen          | SIFT        | Rs-number   |
|-----|-------|-----------------|---------------------|-----------------|---------------------|-------------------|-------------|-------------|
| T>C | S107P | 68114           | 49,8                | 12658           | 22733               | Benign            | Tolerated*  | rs6647476   |
| G>A | S82N  | 92              | 0.0502              | 0               | 28                  | Benign            | Tolerated   | rs746783950 |
| C>T | R391C | 91              | 0.0444              | 1               | 23                  | Possibly damaging | Deleterious | rs144755294 |
| C>G | Q212E | 80              | 0.0408              | 0               | 26                  | Benign            | Tolerated   | rs145061343 |
| G>A | V254I | 62              | 0.0302              | 1               | 20                  | Benign            | Tolerated   | rs759933264 |
| G>A | A163T | 34              | 0.0173              | 0               | 8                   | Benign            | Tolerated   | rs201661705 |
| A>G | H575R | 21              | 0.0102              | 0               | 8                   | Probably damaging | Tolerated   | rs140303247 |
| G>A | R482Q | 19              | 0.00928             | 0               | 11                  | Benign            | Tolerated   | rs770854933 |
| G>C | A163P | 16              | 0.00816             | 0               | 4                   | Benign            | Tolerated   | rs201661705 |
| G>A | A286T | 15              | 0.00733             | 0               | 4                   | Benign            | Deleterious | rs376266144 |
| C>T | R482W | 15              | 0.00732             | 0               | 6                   | Possibly damaging | Deleterious | rs760971939 |
| C>T | R300C | 13              | 0.0071              | 0               | 7                   | Probably damaging | Tolerated   | rs201194222 |
| C>T | P604L | 11              | 0.006               | 0               | 2                   | Probably damaging | Deleterious | rs749396500 |
| G>A | V447M | 11              | 0.006               | 0               | 4                   | Benign            | Deleterious | rs201039304 |

SNPs were retrieved from the gnomAD database <sup>26</sup>, last accessed 2023-06-02. NM\_006517.3 and NP\_006508.1 were used as reference sequence. SNPs with an allele count >10 and at least two hemizygous male were extracted. \*indicates low confidence.

**Supplementary Table 5.** Gene-based association of SLC16A2 with relevant traits

| Trait                             | group  | Chisq(Obs) | P <sub>fastBAT</sub> | Top P <sub>GWAS</sub> | TopSNP           |
|-----------------------------------|--------|------------|----------------------|-----------------------|------------------|
| BMI                               | all    | 4.71E+02   | 0.00013482           | 1.12E-07              | rs5937846        |
|                                   | female | 2.88E+02   | 0.0169823            | 3.16E-07              | rs5937846        |
|                                   | male   | 357.778    | 0.00421502           | 0.000350593           | rs67481382       |
| ECG                               | all    | 139.5      | 0.125639             | 0.000342671           | rs60360874       |
|                                   | female | 163.516    | 0.04783              | 0.000538993           | rs60360874       |
|                                   | male   | 96.2844    | 0.490546             | 0.0191054             | rs182834831      |
| FT4                               | all    | 213.745    | 9.87E-05             | 2.74E-05              | rs150010878      |
|                                   | female | 225.379    | 7.92E-05             | 5.51E-05              | rs67736575       |
|                                   | male   | 103.581    | 0.0196441            | 0.000640652           | rs4892386        |
| SHBG                              | all    | 234.592    | 0.291762             | 0.0034254             | rs5981613        |
|                                   | female | 195.502    | 0.377007             | 0.000393413           | rs112510481      |
|                                   | male   | 178.801    | 0.858424             | 0.0142882             | rs113462626      |
| TSH                               | all    | 54.4876    | 0.243617             | 0.0108529             | rs4255295        |
|                                   | female | 56.0216    | 0.225959             | 0.0106506             | rs67736575       |
|                                   | male   | 41.2806    | 0.316881             | 0.00802387            | rs143051802      |
| Fluid Intelligence                | all    | 234.592    | 0.291762             | 0.0034254             | rs5981613        |
|                                   | female | 205.22     | 0.236291             | 0.0106706             | rs6647502        |
|                                   | male   | 318.861    | 0.0136554            | 0.000581449           | rs6647506        |
| anteromedial_temporal_area        | all    | 76.9227    | 0.804863             | 0.0205235             | rs146302399      |
|                                   | female | 109.099    | 0.345575             | 0.00147346            | rs60764888       |
|                                   | male   | 65.7676    | 0.870022             | 0.00921819            | rs141167022      |
| dorsolateral_prefrontal_area      | all    | 161.542    | 0.0748153            | 0.00473037            | rs5937291        |
|                                   | female | 117.836    | 0.265617             | 0.00326217            | rs112356501      |
|                                   | male   | 101.342    | 0.393448             | 0.00322024            | rs141402453      |
| dorsolateral_prefrontal_thickness | all    | 198.51     | 0.0226888            | 0.00173186            | rs6647502        |
|                                   | female | 96.2103    | 0.494324             | 0.0181592             | rs5981640        |
|                                   | male   | 137.018    | 0.124135             | 0.00190093            | X:73740097_AAG_A |
| dorsomedial_frontal_area          | all    | 118.074    | 0.298941             | 0.0122411             | rs192423676      |
|                                   | female | 120.993    | 0.240852             | 0.00849193            | rs147611522      |
|                                   | male   | 82.8742    | 0.64199              | 0.0111388             | rs192423676      |
| inferior_parietal_area            | all    | 83.9847    | 0.713464             | 0.0346536             | rs112931797      |
|                                   | female | 88.5502    | 0.596691             | 0.0263457             | rs113462626      |
|                                   | male   | 81.5113    | 0.661798             | 0.0515464             | X:73787129_AT_A  |
| inferior_parietal_thickness       | all    | 177.307    | 0.0448611            | 0.00248923            | rs768466155      |
|                                   | female | 74.9944    | 0.781435             | 0.0600619             | rs145996805      |
|                                   | male   | 133.543    | 0.13947              | 0.00152617            | rs111853373      |
| medial_prefrontal_thickness       | all    | 72.718     | 0.853327             | 0.00208956            | rs5937286        |
|                                   | female | 70.2054    | 0.839626             | 0.011156              | rs62611941       |
|                                   | male   | 93.2663    | 0.495075             | 0.00819922            | rs5937286        |
| medial_temporal_thickness         | all    | 130.212    | 0.205512             | 0.000978874           | rs73216270       |
|                                   | female | 100.181    | 0.444834             | 1.84E-05              | rs149056740      |
|                                   | male   | 108.273    | 0.318571             | 0.00151221            | rs73216270       |
| middle_temporal_thickness         | all    | 73.6598    | 0.842976             | 0.0425905             | rs113462626      |
|                                   | female | 83.7017    | 0.663938             | 0.0480361             | rs142852129      |
|                                   | male   | 58.0788    | 0.939256             | 0.0457526             | rs147818495      |
| motor_premotor_area               | all    | 100.874    | 0.485964             | 0.0448475             | rs5937848        |
|                                   | female | 184.333    | 0.0309357            | 0.00201267            | rs6647506        |
|                                   | male   | 62.9282    | 0.898934             | 0.038892              | rs146302399      |
| motor_premotor_SMA_thickness      | all    | 213.797    | 0.0139541            | 0.000386466           | rs4319247        |
|                                   | female | 102.42     | 0.418289             | 0.00505675            | rs60764888       |
|                                   | male   | 237.9      | 0.00464848           | 0.000567365           | rs1926864        |
| occipital_area                    | all    | 85.253     | 0.696237             | 0.0187725             | rs184953713      |
|                                   | female | 92.1738    | 0.547357             | 0.019607              | rs60360874       |
|                                   | male   | 90.5313    | 0.532459             | 0.00826458            | rs182024341      |
| occipital_thickness               | all    | 153.77     | 0.0963246            | 0.00320667            | rs111853373      |

|                                  |        |         |            |             |                  |
|----------------------------------|--------|---------|------------|-------------|------------------|
| orbitofrontal_area               | female | 78.9882 | 0.728745   | 0.0112366   | rs112931797      |
|                                  | male   | 148.852 | 0.0834621  | 0.00223899  | X:73740097_AAG_A |
|                                  | all    | 91.5544 | 0.60962    | 0.0158559   | rs58009583       |
| pars_opercularis_area            | female | 81.9624 | 0.688041   | 0.0474203   | rs73216271       |
|                                  | male   | 90.9574 | 0.526553   | 0.0303415   | rs140165355      |
|                                  | all    | 113.758 | 0.339794   | 0.00133594  | rs5937827        |
| posterolateral_temporal_area     | female | 166.156 | 0.0558293  | 0.00164152  | rs112866421      |
|                                  | male   | 76.0501 | 0.740038   | 0.00455725  | rs5937827        |
|                                  | all    | 252.956 | 0.00409539 | 0.000336817 | rs4255295        |
| precuneus_area                   | female | 175.011 | 0.0418458  | 0.00233496  | rs5937291        |
|                                  | male   | 147.789 | 0.0864893  | 0.00123739  | rs146302399      |
|                                  | all    | 84.3993 | 0.70785    | 0.050557    | rs150205528      |
| superior_parietal_area           | female | 113.283 | 0.305146   | 0.00174938  | rs112818030      |
|                                  | male   | 83.8922 | 0.627201   | 0.00168528  | rs182024341      |
|                                  | all    | 73.4758 | 0.845023   | 0.0094984   | rs7056656        |
| superior_parietal_thickness      | female | 91.5363 | 0.555938   | 0.00924649  | rs111853373      |
|                                  | male   | 74.3792 | 0.76317    | 0.00997637  | rs5981637        |
|                                  | all    | 212.06  | 0.0147429  | 0.000191264 | rs58321140       |
| superior_temporal_area           | female | 107.234 | 0.364874   | 0.00188382  | rs149056740      |
|                                  | male   | 118.795 | 0.227479   | 0.00337302  | rs58321140       |
|                                  | all    | 176.397 | 0.0462024  | 0.00181479  | rs5937813        |
| temporal_pole_thickness          | female | 224.448 | 0.00859523 | 2.04E-05    | rs2094331        |
|                                  | male   | 109.046 | 0.310958   | 0.0083326   | rs149343149      |
|                                  | all    | 94.447  | 0.570209   | 0.0229271   | rs73216270       |
| ventral_frontal_thickness        | female | 84.0544 | 0.659038   | 0.0245128   | rs73216248       |
|                                  | male   | 86.778  | 0.585518   | 0.0411264   | rs145996805      |
|                                  | all    | 196.362 | 0.0243011  | 0.000345265 | rs192423676      |
| ventromedial_occipital_thickness | female | 86.5191 | 0.624785   | 0.00254614  | rs73216271       |
|                                  | male   | 230.685 | 0.00583523 | 0.000397021 | rs140165355      |
|                                  | all    | 92.0527 | 0.602791   | 0.01057     | rs147818495      |
| 3rd_ventricle                    | female | 122.211 | 0.23185    | 0.015426    | rs112818030      |
|                                  | male   | 68.1325 | 0.843258   | 0.0176302   | rs141402453      |
|                                  | all    | 96.0417 | 0.548798   | 0.0400728   | rs72630714       |
| 4th_ventricle                    | female | 76.0289 | 0.768078   | 0.0272325   | rs73216259       |
|                                  | male   | 83.7958 | 0.628601   | 0.0171078   | rs17312542       |
|                                  | all    | 126.834 | 0.228487   | 0.000846581 | rs5981640        |
| amygdala                         | female | 84.432  | 0.65379    | 0.0718297   | rs149008214      |
|                                  | male   | 104.313 | 0.359881   | 0.00574284  | rs149056740      |
|                                  | all    | 152.499 | 0.100385   | 0.00201316  | rs112931797      |
| brainstem                        | female | 85.0713 | 0.644901   | 0.0240521   | rs60502356       |
|                                  | male   | 158.723 | 0.0600135  | 0.000917463 | rs4348648        |
|                                  | all    | 93.5797 | 0.581959   | 0.0528564   | rs6647476        |
| caudate_nucleus                  | female | 132.799 | 0.165558   | 0.00366111  | rs12835261       |
|                                  | male   | 67.1136 | 0.855069   | 0.0108333   | rs12557933       |
|                                  | all    | 86.96   | 0.672859   | 0.0159017   | rs12557933       |
| cerebellum_cortex                | female | 134.205 | 0.158225   | 0.00641071  | rs12557933       |
|                                  | male   | 60.1665 | 0.923349   | 0.0024073   | rs139620417      |
|                                  | all    | 85.9403 | 0.686846   | 0.00273607  | rs191421189      |
| cerebellum_white_matter          | female | 87.6272 | 0.609431   | 0.0138913   | rs5937844        |
|                                  | male   | 66.6366 | 0.860454   | 0.0311104   | rs191421189      |
|                                  | all    | 97.6488 | 0.527526   | 0.00241024  | rs191421189      |
| corpus_callosum_anterior         | female | 118.365 | 0.261322   | 0.00297733  | rs62611941       |
|                                  | male   | 55.7376 | 0.954456   | 0.0482366   | rs191421189      |
|                                  | all    | 107.111 | 0.410856   | 0.0043249   | rs112931797      |
| corpus_callosum_central          | female | 128.523 | 0.189879   | 0.00159301  | rs149680282      |
|                                  | male   | 63.6201 | 0.892233   | 0.0346695   | rs12557933       |
|                                  | all    | 147.977 | 0.116252   | 0.00966149  | rs150010878      |

|                               |        |         |           |             |                 |
|-------------------------------|--------|---------|-----------|-------------|-----------------|
|                               | female | 102.62  | 0.415972  | 0.0130329   | rs146302399     |
|                               | male   | 143.264 | 0.100661  | 0.00474538  | rs182834831     |
| corpus_callosum_mid_anterior  | all    | 178.447 | 0.0432375 | 0.00247299  | rs113979039     |
|                               | female | 123.868 | 0.220085  | 0.0098929   | rs112578685     |
|                               | male   | 150.01  | 0.0802871 | 0.00905106  | rs150010878     |
| corpus_callosum_mid_posterior | all    | 197.303 | 0.0235807 | 0.001151    | rs1926864       |
|                               | female | 62.0359 | 0.919758  | 0.0771133   | rs145391909     |
|                               | male   | 206.759 | 0.012491  | 0.000438378 | rs150010878     |
| corpus_callosum_posterior     | all    | 114.05  | 0.336903  | 0.00114965  | rs112931797     |
|                               | female | 89.956  | 0.577402  | 0.00765716  | rs112931797     |
|                               | male   | 84.7265 | 0.615103  | 0.000241661 | rs148492965     |
| CSF                           | all    | 93.4813 | 0.583296  | 0.0465898   | rs140165355     |
|                               | female | 76.854  | 0.757266  | 0.0318604   | rs184398171     |
|                               | male   | 121.865 | 0.205685  | 0.0122033   | rs767630232     |
| hippocampus                   | all    | 78.5912 | 0.784196  | 0.0366635   | rs112931797     |
|                               | female | 109.777 | 0.338745  | 0.018871    | rs6647506       |
|                               | male   | 70.711  | 0.811652  | 0.0141248   | rs187456990     |
| inferior_lateral_ventricle    | all    | 162.379 | 0.0728076 | 0.000436079 | X:73598155_GA_G |
|                               | female | 104.166 | 0.398322  | 0.0163566   | rs5981637       |
|                               | male   | 106.695 | 0.334564  | 0.00131057  | X:73598155_GA_G |
| intracranial_volume           | all    | 89.1514 | 0.642684  | 0.0146644   | rs4255295       |
|                               | female | 100.506 | 0.440921  | 0.0171996   | rs73216270      |
|                               | male   | 96.3873 | 0.454113  | 0.012154    | rs7057972       |
| lateral_ventricle             | all    | 117.926 | 0.30027   | 0.0139628   | rs149008214     |
|                               | female | 62.4653 | 0.916265  | 0.0266191   | rs60360874      |
|                               | male   | 91.4716 | 0.519466  | 0.0226407   | rs150046039     |
| pallidum                      | all    | 183.494 | 0.0367372 | 0.00145957  | rs141402453     |
|                               | female | 121.937 | 0.233846  | 0.00951454  | rs374584740     |
|                               | male   | 141.054 | 0.108412  | 0.00156817  | rs141402453     |
| thalamus                      | all    | 101.01  | 0.484245  | 0.0202101   | rs376674720     |
|                               | female | 130.964 | 0.175614  | 0.00277647  | rs12559757      |
|                               | male   | 92.0706 | 0.511263  | 0.0111331   | rs73216248      |
| ventral_diencephalon          | all    | 169.257 | 0.0582299 | 0.000722274 | rs141402453     |
|                               | female | 149.743 | 0.095452  | 0.0021342   | rs191435310     |
|                               | male   | 120.981 | 0.211751  | 0.0018776   | rs12557933      |

---

SLC16A2 gene body was defined as extending from 73641327-73753767 in chromosome X. Significance of the gene-based test is compared with the regional tophit in the univariate analysis.

---

**Supplementary Table 6.** Characterization of missense variants identified in MCT8 deficiency

| Affected residue | Variant | Loss of transport capacity | Protein expression | Cell surface expression | Critical group | Critical property      | Conservation score |
|------------------|---------|----------------------------|--------------------|-------------------------|----------------|------------------------|--------------------|
| Ile188           | I188N   |                            |                    |                         | 3              | Branched AA            | -1,002             |
| His192           | H192R   |                            |                    |                         | 1              | H-bond/pi-pi to T4     | -0,427             |
|                  | H192P*  |                            |                    |                         | 1              |                        |                    |
| Ser194           | S194F   |                            |                    |                         | -              | NA                     | -0,947             |
| Gly196           | G196V   |                            |                    |                         | 1              | Small size/flexibility | -0,656             |
|                  | G196E   |                            |                    |                         | 1              |                        |                    |
| Leu203           | L203P   |                            |                    |                         |                | Branched AA            | 1,023              |
| Gly221           | G221R   |                            |                    |                         | -              | NA                     | -0,648             |
| Ala224           | A224T   |                            |                    |                         | NA             | Size                   | -0,384             |
|                  | A224V   |                            |                    |                         | NA             |                        |                    |
|                  | A224E*  |                            |                    |                         | NA             |                        |                    |
| Met227           | M227R   |                            |                    |                         | -              | NA                     | -0,882             |
| Ser232           | S232F   |                            |                    |                         | -              | NA                     | -0,951             |
| Val235           | V235M   |                            |                    |                         | -              | NA                     | -0,763             |
| Thr239           | T239P   |                            |                    |                         | -              | NA                     | -0,860             |
| Gly251           | G251E   |                            |                    |                         | 7              | Size, flexibility      | -0,799             |
| Ala252           | A252P   |                            |                    |                         | NA             | NA                     | -0,786             |
| Arg271           | R271H   |                            |                    |                         | 3              | Size/charge?           | -0,644             |
|                  | R271S   |                            |                    |                         | 3              |                        |                    |
| Gly276           | G276R   |                            |                    |                         | -              | NA                     | -0,800             |
| Gly282           | G282C   |                            |                    |                         | 3              | Small, flexibility     | -0,794             |
|                  | G282D   |                            |                    |                         | 3              |                        |                    |
| Cys283           | C283Y   |                            |                    |                         | 3              | Small, flexibility     | -0,465             |
| Pro289           | P289L   |                            |                    |                         | 6              | NA                     | -0,843             |
| Ser290           | S290F   |                            |                    |                         | -              | NA                     | -0,773             |
| Leu291           | L291R   |                            |                    |                         | 6              | Branched AA            | -0,874             |

*Table continues on next page*

**Supplementary Table 6.** Characterization of missense variants identified in MCT8 deficiency (continued)

| Affected residue | Variant | Loss of transport capacity | Protein expression | Cell surface expression | Critical group | Critical property      | Conservation score |
|------------------|---------|----------------------------|--------------------|-------------------------|----------------|------------------------|--------------------|
| Phe298           | F298L   |                            |                    |                         | 6              | Aromatic group         | -0,871             |
| Leu304           | L304P   |                            |                    |                         | 4              | Branched AA            | -0,656             |
| Gly307           | G307C   |                            |                    |                         | 4              | Small, flexibility     | -0,667             |
| Gly312           | G312R   |                            |                    |                         | -              | NA                     | 0,718              |
| Ser313           | S313R   |                            |                    |                         | -              | NA                     | -0,821             |
| Pro321           | P321L   |                            |                    |                         | -              | NA                     | -0,596             |
| Tyr354           | Y354C   |                            |                    |                         | 7              | Aromatic               | -0,545             |
| Trp398           | W398R   |                            |                    |                         | -              | NA                     | -0,948             |
| Gly401           | G401R   |                            |                    |                         | -              | NA                     | -0,638             |
|                  | G401E   |                            |                    |                         | -              |                        |                    |
| Leu433           | L433H   |                            |                    |                         | 2              | Aliphatic, branched AA | -0,665             |
| Leu434           | L434W   |                            |                    |                         | 1              | Aliphatic, branched AA | -0,768             |
| Ser441           | S441L   |                            |                    |                         | 2              | Hydroxyl-group         | -1,008             |
|                  | S441P   |                            |                    |                         | 2              |                        |                    |
| Arg445           | R445C   |                            |                    |                         | 1              | Positive charge        | -0,994             |
|                  | R445S   |                            |                    |                         | 1              |                        |                    |
|                  | R445L   |                            |                    |                         | 1              |                        |                    |
| Gly449           | G449D   |                            |                    |                         | 4              | Flexibility            | -0,953             |
| Asp453           | D453N   |                            |                    |                         | 4              | Size and + charge      | -0,994             |
|                  | D453V   |                            |                    |                         | 4              |                        |                    |
| Leu469           | L469P   |                            |                    |                         | -              | NA                     | 0,593              |
| Leu471           | L471P   |                            |                    |                         | 2              | NA                     | -0,459             |
|                  | L471R   |                            |                    |                         | 2              |                        |                    |
| Cys491           | C491Y   |                            |                    |                         | -              | NA                     | -0,519             |
| Leu492           | L492P   |                            |                    |                         | -              | NA                     | -0,123             |
| Leu494           | L494P   |                            |                    |                         | 2              | NA                     | -0,706             |

*Table continues on next page*



**Supplementary Table 6.** Characterization of missense variants identified in MCT8 deficiency (continued)

| Affected residue | Variant | Loss of transport capacity | Protein expression | Cell surface expression | Critical group | Critical property | Conservation score |
|------------------|---------|----------------------------|--------------------|-------------------------|----------------|-------------------|--------------------|
| Gly495           | G495A   |                            |                    |                         | 3              | Size, flexibility | -0,953             |
| Asp498           | D498N   |                            |                    |                         | 1              | - charge          | -0,838             |
| Gly499           | G499D   |                            |                    |                         | 1              | Size, flexibility | -0,808             |
| Leu512           | L512P   |                            |                    |                         | -              | NA                | -0,764             |
| Ser519           | S519L   |                            |                    |                         | 5              | Hydroxyl-group    | -1,008             |
| Gly527           | G527S   |                            |                    |                         | 5              | Flexibility       | -0,953             |
| Gly536           | G536R   |                            |                    |                         | 7              | Flexibility       | -0,953             |
| Pro537           | P537L   |                            |                    |                         | -              | NA                | -0,848             |
| Leu534           | L543P   |                            |                    |                         | -              | NA                | -0,725             |
| Ala553           | A553D   |                            |                    |                         | NA             | NA                | -0,769             |
| Gly558           | G558D   |                            |                    |                         | -              | NA                | -0,952             |
| Gly564           | G564E   |                            |                    |                         | -              | NA                | -0,952             |
|                  | G564R   |                            |                    |                         | -              |                   |                    |
| Leu568           | L568P   |                            |                    |                         | -              | NA                | -0,882             |

*Comprehensive overview of pathogenic mechanisms of studied missense variants and their conservation scores (hsMCT8 vs all MCT8). Color codes (see scale below) indicate the loss of transport capacity, the protein expression and the cell surface expression of individual variants in vitro, compared to mock-transfected cells (set to 0%) and cells transfected with WT MCT8 (set to 100%). Abbreviations: AA, amino acid; NA, not applicable. \* denotes variant reported in ClinVar.*

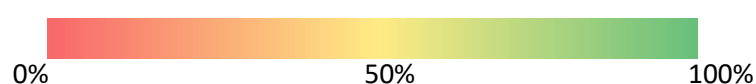

**Supplementary Table 7. Sequences for conservation analyses.**

| Sequence                             | Protein                                                               | Organism                                          |
|--------------------------------------|-----------------------------------------------------------------------|---------------------------------------------------|
| <b><u>hsMCT8 versus all MCT8</u></b> |                                                                       |                                                   |
| A0A0P7W0K4                           | Monocarboxylate transporter 8-like                                    | Scleropages formosus (Asian bonytongue)           |
| A0A4W5P5E4                           | Uncharacterized protein                                               | Hucho hucho (huchen)                              |
| A0A4W4F7A7                           | MFS domain-containing protein                                         | Electrophorus electricus (Electric eel)           |
| A0A3P8UY50                           | Monocarboxylate transporter 8                                         | Cynoglossus semilaevis (Tongue sole)              |
| A0A2I4B229                           | monocarboxylate transporter 8                                         | Austrofundulus limnaeus                           |
| A0A3Q3B655                           | Solute carrier family 16 member 2                                     | Kryptolebias marmoratus (Mangrove killifish)      |
| A0A3Q2Y2S7                           | Monocarboxylate transporter 8-like                                    | Hippocampus comes (Tiger tail seahorse)           |
| A0A3B3ZTW0                           | MFS domain-containing protein                                         | Periophthalmus magnuspinnatus                     |
| A0A672Z3Q4                           | Uncharacterized protein                                               | Sphaerama orbicularis (orbiculate cardinalfish)   |
| A0A3B3HBM5                           | Monocarboxylate transporter 8                                         | Oryzias latipes (Japanese rice fish)              |
| H2LCL0                               | Monocarboxylate transporter 8                                         | Oryzias latipes (Japanese rice fish)              |
| A0A3Q1IHC1                           | Solute carrier family 16 member 2                                     | Anabas testudineus (Climbing perch)               |
| A0A6P7NLU8                           | monocarboxylate transporter 8                                         | Betta splendens (Siamese fighting fish)           |
| A0A1A7WM54                           | Solute carrier family 16 (Monocarboxylic acid transporters), member 2 | Iconisemion striatum                              |
| A0A3Q3KV54                           | Solute carrier family 16 member 2                                     | Mastacembelus armatus (zig-zag eel)               |
| A0A3Q2CVZ6                           | Monocarboxylate transporter 8-like                                    | Cyprinodon variegatus (Sheepshead minnow)         |
| A0A3P9PQK7                           | Solute carrier family 16 member 2                                     | Poecilia reticulata (Guppy)                       |
| A0A3Q2TZE8                           | Solute carrier family 16 member 2                                     | Fundulus heteroclitus (Killifish)                 |
| A0A3P8SS10                           | Solute carrier family 16 member 2                                     | Amphiprion percula (Orange clownfish)             |
| A0A3P8SSH6                           | Solute carrier family 16 member 2                                     | Amphiprion percula (Orange clownfish)             |
| A0A3Q0T7V0                           | Solute carrier family 16 member 2                                     | Amphilophus citrinellus (Midas cichlid)           |
| A0A668TT83                           | Solute carrier family 16 member 2                                     | Oreochromis aureus (Israeli tilapia)              |
| A0A668TQJ4                           | Solute carrier family 16 member 2                                     | Oreochromis aureus (Israeli tilapia)              |
| A0A667X4F9                           | Monocarboxylate transporter 8-like                                    | Myripristis murdjan (pinecone soldierfish)        |
| A0A3Q3NM92                           | Monocarboxylate transporter 8-like                                    | Labrus bergylta (ballan wrasse)                   |
| G3Q0F3                               | Solute carrier family 16 member 2                                     | Gasterosteus aculeatus (Three-spined stickleback) |
| A0A671WG38                           | Monocarboxylate transporter 8-like                                    | Sparus aurata (Gilthead sea bream)                |
| A0A6P8TU20                           | LOW QUALITY PROTEIN: monocarboxylate transporter 8                    | Gymnodraco acuticeps (Antarctic dragonfish)       |
| A0A5C6MLW9                           | Monocarboxylate transporter 8                                         | Takifugu flavidus (sansaifugu)                    |
| A0A6P7J563                           | monocarboxylate transporter 8-like                                    | Parambassis ranga (Indian glassy fish)            |
| A0A6G1PUE8                           | Monocarboxylate transporter 8                                         | Channa argus (northern snakehead)                 |
| A0A6A4T138                           | Uncharacterized protein                                               | Scophthalmus maximus (Turbot)                     |
| A0A3Q3JGK9                           | Monocarboxylate transporter 8-like                                    | Monopterus albus (Swamp eel)                      |
| A0A3B4UVY0                           | Solute carrier family 16 member 2                                     | Seriola dumerili (Greater amberjack)              |
| A0A665XG26                           | Monocarboxylate transporter 8-like                                    | Echeneis naucrates (Live sharksucker)             |
| A0A5N5MGB2                           | MFS domain-containing protein                                         | Pangasianodon hypophthalmus (Striped catfish)     |
| A0A6P3W4V1                           | monocarboxylate transporter 8                                         | Clupea harengus (Atlantic herring)                |
| A0A3P8XJ90                           | Solute carrier family 16 member 2                                     | Esox lucius (Northern pike)                       |
| A0A673WGL6                           | Monocarboxylate transporter 8-like                                    | Salmo trutta (Brown trout)                        |
| A0A5A9NJ52                           | Monocarboxylate transporter 8                                         | Triplophysa tibetana                              |
| A0A553QVJ6                           | Uncharacterized protein                                               | Danionella translucida                            |
| A0A673K5T1                           | Monocarboxylate transporter 8-like                                    | Sinocyclocheilus rhinoceros                       |
| A0A0G2L3Z8                           | MFS domain-containing protein                                         | Danio rerio (Zebrafish)                           |
| A0A0G2KDP5                           | MFS domain-containing protein                                         | Danio rerio (Zebrafish)                           |
| A0A6J2US61                           | monocarboxylate transporter 8-like                                    | Chanos chanos (Milkfish)                          |
| A0A4W4EBJ0                           | MFS domain-containing protein                                         | Electrophorus electricus (Electric eel)           |
| A0A4W4EBH4                           | MFS domain-containing protein                                         | Electrophorus electricus (Electric eel)           |
| A0A3B4CWB3                           | Solute carrier family 16 member 2                                     | Pygocentrus nattereri (Red-bellied piranha)       |
| W5K910                               | MFS domain-containing protein                                         | Astyanax mexicanus (Blind cave fish)              |

|                                                                                                                                                                                                                                                                                                                                                               |                                                                                                                                                                                                                                                                                                                                                                                                                                                                                                                                                                                                                                                                                                                                                                                                                                                                                                         |                                                                                                                                                                                                                                                                                                                                                                                                                                                                                                                                                                                                                                                                                                                                                                                                                                                                                                                                                                                                                               |
|---------------------------------------------------------------------------------------------------------------------------------------------------------------------------------------------------------------------------------------------------------------------------------------------------------------------------------------------------------------|---------------------------------------------------------------------------------------------------------------------------------------------------------------------------------------------------------------------------------------------------------------------------------------------------------------------------------------------------------------------------------------------------------------------------------------------------------------------------------------------------------------------------------------------------------------------------------------------------------------------------------------------------------------------------------------------------------------------------------------------------------------------------------------------------------------------------------------------------------------------------------------------------------|-------------------------------------------------------------------------------------------------------------------------------------------------------------------------------------------------------------------------------------------------------------------------------------------------------------------------------------------------------------------------------------------------------------------------------------------------------------------------------------------------------------------------------------------------------------------------------------------------------------------------------------------------------------------------------------------------------------------------------------------------------------------------------------------------------------------------------------------------------------------------------------------------------------------------------------------------------------------------------------------------------------------------------|
| A0A3B1K9K8<br>W5N858<br>A0A3B3TCK7<br>A0A0P7WV38<br>A0A4W3JKU4<br>A0A401P3C6<br>F7BHA6<br>A0A7N4NRH6<br>A0A5F4VZX7<br>M3YA43<br><br>A0A5E4CB28<br>G3SUL4<br>F7D7T1<br><br>A0A6P8RDI2<br>A0A6P7YKZ6<br>A0A099Z5H0<br>U3K8E3<br>A0A2P4T773<br><br>K7G832<br>A0A7M4EIQ3<br>A0A6I9Z381<br>A0A670YSN4<br>A0A670K2C8<br>A0A6J0T1R0                                  | MFS domain-containing protein<br>Solute carrier family 16 member 2<br>Monocarboxylate transporter 8-like<br>Monocarboxylate transporter 8-like<br>MFS domain-containing protein<br>Uncharacterized protein<br>Solute carrier family 16 member 2<br>Solute carrier family 16 member 2<br>Solute carrier family 16 member 2<br>Solute carrier family 16 member 2<br><br>Monocarboxylate transporter 8<br>Solute carrier family 16 member 2<br>Solute carrier family 16, member 2<br>(thyroid hormone transporter)<br>monocarboxylate transporter 8<br>monocarboxylate transporter 8<br>Monocarboxylate transporter 8<br>Solute carrier family 16 member 2<br>Uncharacterized protein<br><br>Uncharacterized protein<br>Solute carrier family 16 member 2<br>monocarboxylate transporter 8<br>Solute carrier family 16 member 2<br>Uncharacterized protein<br>monocarboxylate transporter 8                | Astyanax mexicanus (Blind cave fish)<br>Lepisosteus oculatus (Spotted gar)<br>Paramormyrops kingsleyae<br>Scleropages formosus (Asian bonytongue)<br>Callorhynchus milii (Ghost shark)<br>Scyliorhinus torazame (Cloudy catshark)<br>Ornithorhynchus anatinus (Duckbill platypus)<br>Sarcophilus harrisii (Tasmanian devil)<br>Callithrix jacchus (White-tufted-ear marmoset)<br>Mustela putorius furo (European domestic ferret)<br>Marmota monax (Woodchuck)<br>Loxodonta africana (African elephant)<br>Xenopus tropicalis (Western clawed frog)<br><br>Geotrypetes seraphini (Gaboon caecilian)<br>Microcaecilia unicolor<br>Tinamus guttatus (White-throated tinamou)<br>Ficedula albicollis (Collared flycatcher)<br>Bambusicola thoracicus (Chinese bamboo-partridge)<br>Pelodiscus sinensis (Chinese softshell turtle)<br>Crocodylus porosus (Saltwater crocodile)<br>Thamnophis sirtalis<br>Pseudonaja textilis (Eastern brown snake)<br>Podarcis muralis (Wall lizard)<br>Pogona vitticeps (central bearded dragon) |
| <b><u>hsMCT8 versus mammal MCT8</u></b><br>F7BHA6<br>A0A7N4NRH6<br>M3YA43<br><br>A0A5E4CB28<br>A0A2K5L6Y7<br>A0A6J3QTC0<br><br>F6Z232<br>A0A2K6GCU4<br>A0A2Y9GS85<br><br>A0A7J8EM28<br>F1MM56<br>A0A384D2Q5<br>A0A452QMZ6<br>G1PA04<br>A0A3Q7V1Q5<br>A0A5N4C2S6<br>A0A341D559<br><br>G1SEY4<br>A0A2K5TN74<br>A0A6J0XQP9<br>I3LJG4<br>A0A6P6IS12<br>A0A4W2IJN1 | Solute carrier family 16 member 2<br>Solute carrier family 16 member 2<br>Solute carrier family 16 member 2<br><br>Monocarboxylate transporter 8<br>Solute carrier family 16 member 2<br>monocarboxylate transporter 8 isoform X2<br><br>Solute carrier family 16 member 2<br>Solute carrier family 16 member 2<br>monocarboxylate transporter 8<br><br>Solute carrier family 16 member 2<br>Solute carrier family 16 member 2<br>monocarboxylate transporter 8<br>Solute carrier family 16 member 2<br>Solute carrier family 16 member 2<br>monocarboxylate transporter 8<br>Monocarboxylate transporter 8<br>monocarboxylate transporter 8<br><br>Solute carrier family 16 member 2<br>Solute carrier family 16 member 2<br>monocarboxylate transporter 8<br>Solute carrier family 16 member 2<br>monocarboxylate transporter 8<br>monocarboxylate transporter 8<br>Solute carrier family 16 member 2 | Ornithorhynchus anatinus (Duckbill platypus)<br>Sarcophilus harrisii (Tasmanian devil)<br>Mustela putorius furo (European domestic ferret)<br>Marmota monax (Woodchuck)<br>Cercopithecus atys (Sooty mangabey)<br>Tursiops truncatus (Atlantic bottle-nosed dolphin)<br>Macaca mulatta (Rhesus macaque)<br>Propithecus coquereli (Coquerel's sifaka)<br>Neomonachus schauinslandi (Hawaiian monk seal)<br>Rousettus aegyptiacus (Egyptian rousette)<br>Bos taurus (Bovine)<br>Ursus maritimus (Polar bear)<br>Ursus americanus (American black bear)<br>Myotis lucifugus (Little brown bat)<br>Ursus arctos horribilis<br>Camelus dromedarius (Dromedary)<br>Neophocaena asiaeorientalis asiaeorientalis (Yangtze finless porpoise)<br>Oryctolagus cuniculus (Rabbit)<br>Macaca fascicularis (Crab-eating macaque)<br>Odocoileus virginianus texanus<br>Sus scrofa (Pig)<br>Puma concolor (Mountain lion)<br>Bos indicus x Bos taurus (Hybrid cattle)                                                                         |

|                                                                                                                                                                                                |                                                                                                                                                                                                                                                                                                                                                                                                                                                                                                               |                                                                                                                                                                                                                                                                                                                                                                                                                                                                                                                                                                                                                                                                                                                                                                                                                                                                                                                                                                                                                                                                                                                                                                                                                                                                                                                                                                                                                                                                                                                                                                                                                                                                                                                                                                                                                       |
|------------------------------------------------------------------------------------------------------------------------------------------------------------------------------------------------|---------------------------------------------------------------------------------------------------------------------------------------------------------------------------------------------------------------------------------------------------------------------------------------------------------------------------------------------------------------------------------------------------------------------------------------------------------------------------------------------------------------|-----------------------------------------------------------------------------------------------------------------------------------------------------------------------------------------------------------------------------------------------------------------------------------------------------------------------------------------------------------------------------------------------------------------------------------------------------------------------------------------------------------------------------------------------------------------------------------------------------------------------------------------------------------------------------------------------------------------------------------------------------------------------------------------------------------------------------------------------------------------------------------------------------------------------------------------------------------------------------------------------------------------------------------------------------------------------------------------------------------------------------------------------------------------------------------------------------------------------------------------------------------------------------------------------------------------------------------------------------------------------------------------------------------------------------------------------------------------------------------------------------------------------------------------------------------------------------------------------------------------------------------------------------------------------------------------------------------------------------------------------------------------------------------------------------------------------|
| F1PS05<br>L5KBV3<br>A0A671DPB9                                                                                                                                                                 | Solute carrier family 16 member 2<br>Monocarboxylate transporter 8<br>Solute carrier family 16 member 2                                                                                                                                                                                                                                                                                                                                                                                                       | Canis lupus familiaris (Dog)<br>Pteropus alecto (Black flying fox)<br>Rhinolophus ferrumequinum (Greater horseshoe bat)<br>Pipistrellus kuhlii (Kuhl's pipistrelle)<br>Camelus ferus (Wild bactrian camel)                                                                                                                                                                                                                                                                                                                                                                                                                                                                                                                                                                                                                                                                                                                                                                                                                                                                                                                                                                                                                                                                                                                                                                                                                                                                                                                                                                                                                                                                                                                                                                                                            |
| A0A7J7S6Q5<br>S9X8J6                                                                                                                                                                           | Solute carrier family 16 member 2<br>Solute carrier family 16, member 2-like protein                                                                                                                                                                                                                                                                                                                                                                                                                          | Phyllostomus discolor (pale spear-nosed bat)<br>Acinonyx jubatus (Cheetah)<br>Muntiacus reevesi (Reeves' muntjac)<br>Physeter macrocephalus (Sperm whale)<br>Loxodonta africana (African elephant)<br>Sapajus apella (Brown-capped capuchin)<br>Crocuta crocuta (Spotted hyena)<br>Octodon degus (Degu)<br>Dipodomys ordii (Ord's kangaroo rat)<br>Pan troglodytes (Chimpanzee)<br>Felis catus (Cat)<br>Nomascus leucogenys (Northern white-cheeked gibbon)<br>Bos mutus (wild yak)<br>Vulpes vulpes (Red fox)<br>Ictidomys tridecemlineatus (Thirteen-lined ground squirrel)<br>Lipotes vexillifer (Yangtze river dolphin)<br>Lynx canadensis (Canada lynx)<br>Suricata suricatta (Meerkat)<br>Balaenoptera acutorostrata scammoni (North Pacific minke whale)<br>Molossus molossus (Pallas' mastiff bat)<br>Ailuropoda melanoleuca (Giant panda)<br>Lynx pardinus (Iberian lynx)<br>Gorilla gorilla gorilla (Western lowland gorilla)<br>Tupaia chinensis (Chinese tree shrew)<br>Cricetulus griseus (Chinese hamster)<br>Pteropus vampyrus (Large flying fox)<br>Enhydra lutris kenyoni<br>Chlorocebus sabaeus (Green monkey)<br>Delphinapterus leucas (Beluga whale)<br>Monodon monoceros (Narwhal)<br>Heterocephalus glaber (Naked mole rat)<br>Callithrix jacchus (White-tufted-ear marmoset)<br>Ovis aries (Sheep)<br>Trichechus manatus latirostris (Florida manatee)<br>Bos indicus (Zebu)<br>Otolemur garnettii (Small-eared galago)<br>Rhinopithecus bieti (Black snub-nosed monkey)<br>Mandrillus leucophaeus (Drill)<br>Myotis myotis (Greater mouse-eared bat)<br>Odobenus rosmarus divergens (Pacific walrus)<br>Macaca nemestrina (Pig-tailed macaque)<br>Erinaceus europaeus (Western European hedgehog)<br>Capra hircus (Goat)<br>Callorhinus ursinus (Northern fur seal)<br>Vicugna pacos (Alpaca) |
| A0A6J2MIS3<br>A0A6J1YYD8<br>A0A5N3XEM3<br>A0A2Y9T6Q4<br>G3TWP7<br>A0A6J3FPH5<br>A0A6G1AXP3<br>A0A6P6DVG8<br>A0A1S3G690<br>A0A6D2VU78<br>M3W8X5<br>G1QJX7                                       | Solute carrier family 16 member 2<br>monocarboxylate transporter 8<br>MFS domain-containing protein<br>monocarboxylate transporter 8<br>Solute carrier family 16 member 2<br>monocarboxylate transporter 8<br>MOT8 protein<br>monocarboxylate transporter 8<br>monocarboxylate transporter 8<br>SLC16A2 isoform 1<br>Solute carrier family 16 member 2<br>MFS domain-containing protein                                                                                                                       |                                                                                                                                                                                                                                                                                                                                                                                                                                                                                                                                                                                                                                                                                                                                                                                                                                                                                                                                                                                                                                                                                                                                                                                                                                                                                                                                                                                                                                                                                                                                                                                                                                                                                                                                                                                                                       |
| L8IYB4<br>A0A3Q7SNF5<br>I3MXZ7                                                                                                                                                                 | Monocarboxylate transporter 8<br>monocarboxylate transporter 8<br>Solute carrier family 16 member 2                                                                                                                                                                                                                                                                                                                                                                                                           |                                                                                                                                                                                                                                                                                                                                                                                                                                                                                                                                                                                                                                                                                                                                                                                                                                                                                                                                                                                                                                                                                                                                                                                                                                                                                                                                                                                                                                                                                                                                                                                                                                                                                                                                                                                                                       |
| A0A340WRZ0<br>A0A667IAV3<br>A0A673VJH2<br>A0A384AMW9                                                                                                                                           | monocarboxylate transporter 8<br>Solute carrier family 16 member 2<br>Solute carrier family 16 member 2<br>monocarboxylate transporter 8                                                                                                                                                                                                                                                                                                                                                                      |                                                                                                                                                                                                                                                                                                                                                                                                                                                                                                                                                                                                                                                                                                                                                                                                                                                                                                                                                                                                                                                                                                                                                                                                                                                                                                                                                                                                                                                                                                                                                                                                                                                                                                                                                                                                                       |
| A0A7J8J7Z7<br>G1L7X1<br>A0A485P6Y7<br>G3R214<br>L8Y6I2<br>A0A3L7H2J0<br>A0A6P3RA03<br>A0A2Y9L287<br>A0A0D9RF61<br>A0A2Y9NZT6<br>A0A4U1ES36<br>A0A0P6J2C4<br>U3EU28<br>A0A6P7DIT7<br>A0A2Y9DS84 | Solute carrier family 16 member 2<br>Solute carrier family 16 member 2<br>Solute carrier family member 2<br>Solute carrier family 16 member 2<br>Monocarboxylate transporter 8<br>SLC16A2<br>monocarboxylate transporter 8<br>monocarboxylate transporter 8<br>MFS domain-containing protein<br>monocarboxylate transporter 8 isoform X1<br>MFS domain-containing protein<br>Monocarboxylate transporter 8<br>Monocarboxylate transporter 8<br>monocarboxylate transporter 8<br>monocarboxylate transporter 8 |                                                                                                                                                                                                                                                                                                                                                                                                                                                                                                                                                                                                                                                                                                                                                                                                                                                                                                                                                                                                                                                                                                                                                                                                                                                                                                                                                                                                                                                                                                                                                                                                                                                                                                                                                                                                                       |
| A0A6P5B4X0<br>H0WPV6<br>A0A2K6LPV7<br>A0A2K5Y5Z0<br>A0A7J7YFA7<br>A0A2U3WNQ8<br>A0A2K6C860<br>A0A1S2ZXF6                                                                                       | monocarboxylate transporter 8<br>Solute carrier family 16 member 2<br>MFS domain-containing protein<br>Solute carrier family 16 member 2<br>Solute carrier family 16 member 2<br>monocarboxylate transporter 8<br>Solute carrier family 16 member 2<br>monocarboxylate transporter 8                                                                                                                                                                                                                          |                                                                                                                                                                                                                                                                                                                                                                                                                                                                                                                                                                                                                                                                                                                                                                                                                                                                                                                                                                                                                                                                                                                                                                                                                                                                                                                                                                                                                                                                                                                                                                                                                                                                                                                                                                                                                       |
| A0A452ET44<br>A0A3Q7Q4V7<br>A0A6I9IRS5                                                                                                                                                         | Solute carrier family 16 member 2<br>monocarboxylate transporter 8<br>monocarboxylate transporter 8                                                                                                                                                                                                                                                                                                                                                                                                           |                                                                                                                                                                                                                                                                                                                                                                                                                                                                                                                                                                                                                                                                                                                                                                                                                                                                                                                                                                                                                                                                                                                                                                                                                                                                                                                                                                                                                                                                                                                                                                                                                                                                                                                                                                                                                       |

|                                                                                                                                                                                                                                                                                                                                                                                                                                    |                                                                                                                                                                                                                                                                                                                                                                                                                                                                                                                                                                                                                                                                                                                                                                                                                                                                                                                                                                                                                                                                                                                                                                                                                |                                                                                                                                                                                                                                                                                                                                                                                                                                                                                                                                                                                                                                                                                                                                                                                                                                                                                                                                                                                                                                                                                                                                                                                                                                                           |
|------------------------------------------------------------------------------------------------------------------------------------------------------------------------------------------------------------------------------------------------------------------------------------------------------------------------------------------------------------------------------------------------------------------------------------|----------------------------------------------------------------------------------------------------------------------------------------------------------------------------------------------------------------------------------------------------------------------------------------------------------------------------------------------------------------------------------------------------------------------------------------------------------------------------------------------------------------------------------------------------------------------------------------------------------------------------------------------------------------------------------------------------------------------------------------------------------------------------------------------------------------------------------------------------------------------------------------------------------------------------------------------------------------------------------------------------------------------------------------------------------------------------------------------------------------------------------------------------------------------------------------------------------------|-----------------------------------------------------------------------------------------------------------------------------------------------------------------------------------------------------------------------------------------------------------------------------------------------------------------------------------------------------------------------------------------------------------------------------------------------------------------------------------------------------------------------------------------------------------------------------------------------------------------------------------------------------------------------------------------------------------------------------------------------------------------------------------------------------------------------------------------------------------------------------------------------------------------------------------------------------------------------------------------------------------------------------------------------------------------------------------------------------------------------------------------------------------------------------------------------------------------------------------------------------------|
| A0A6J2E758<br>A0A096MQQ4<br>A0A6P4V9E0<br>A0A2K5RM24<br><br>A0A643BKS0<br>L5MG83<br>A0A2U3XQR2<br>U6CY06<br>A0A5N3V609<br>A0A2K5KFT7<br><br>A0A091EQ24<br>S7MFP5<br>A0A0A1ECF2<br>A0A2K5E4I2<br>A0A3Q2GVV8<br>A0A1U7SMK5<br>A0A2K6SUL6<br><br>A0A6I9KHK3<br><br>G3V9C2<br><br>Q05BA2<br>A0A1U7R399<br>K9ITE4<br>A0A6I9MCG8<br><br>H0UU03<br>A0A6P5P250<br>H2PW21<br>A0A2R9BXU3<br>Q3ZLS0<br>H9H6J2<br><br>A0A6P5IDU6<br>A0A4X2KC40 | monocarboxylate transporter 8 isoform X1<br>Solute carrier family 16 member 2<br>monocarboxylate transporter 8<br>Solute carrier family 16 member 2<br><br>MFS domain-containing protein<br>Monocarboxylate transporter 8<br>monocarboxylate transporter 8<br>Monocarboxylate transporter 8<br>MFS domain-containing protein<br>Solute carrier family 16 member 2<br><br>Monocarboxylate transporter 8<br>Monocarboxylate transporter 8<br>Solute carrier family 16 member 2<br>Solute carrier family 16 member 2<br>Solute carrier family 16 member 2<br>monocarboxylate transporter 8<br>Solute carrier family 16 member 2<br><br>LOW QUALITY PROTEIN: monocarboxylate transporter 8-like<br>Solute carrier family 16 (Monocarboxylic acid transporters), member 2, isoform CRA_b<br>Slc16a2 protein<br>monocarboxylate transporter 8<br>Putative monocarboxylate transporter 8<br>Solute carrier family 16 member 2<br><br>Solute carrier family 16 member 2<br>monocarboxylate transporter 8<br>Solute carrier family 16 member 2<br>Solute carrier family 16 member 2<br>Solute carrier 16 A 2<br>MFS domain-containing protein<br><br>monocarboxylate transporter 8<br>Solute carrier family 16 member 2 | Zalophus californianus (California sealion)<br>Papio anubis (Olive baboon)<br>Panthera pardus (Leopard)<br>Cebus imitator (Panamanian white-faced capuchin)<br>Balaenoptera physalus (Fin whale)<br>Myotis davidii (David's myotis)<br>Leptonychotes weddellii (Weddell seal)<br>Neovison vison (American mink)<br>Muntiacus muntjak (Barking deer)<br>Colobus angolensis palliatus (Peters' Angolan colobus)<br>Fukomys damarensis (Damaraland mole rat)<br>Myotis brandtii (Brandt's bat)<br>Fukomys anselli (Ansell's mole-rat)<br>Aotus nancymaae (Ma's night monkey)<br>Equus caballus (Horse)<br>Carlito syrichta (Philippine tarsier)<br>Saimiri boliviensis boliviensis (Bolivian squirrel monkey)<br>Chrysochloris asiatica (Cape golden mole)<br><br>Rattus norvegicus (Rat)<br><br>Mus musculus (Mouse)<br>Mesocricetus auratus (Golden hamster)<br>Desmodus rotundus (Vampire bat)<br>Peromyscus maniculatus bairdii (Prairie deer mouse)<br>Cavia porcellus (Guinea pig)<br>Mus caroli (Ryukyu mouse)<br>Pongo abelii (Sumatran orangutan)<br>Pan paniscus (Pygmy chimpanzee)<br>Macropus eugenii (Tamar wallaby)<br>Monodelphis domestica (Gray short-tailed opossum)<br>Phascolarctos cinereus (Koala)<br>Vombatus ursinus (Common wombat) |
| <u><b>hsMCT8 versus functionally evaluated MCT8</b></u><br>NP_033223.2<br>NP_671749.2<br>NP_001245159.1<br>AMQ48645.1<br>A0A1L8F2I6                                                                                                                                                                                                                                                                                                | Monocarboxylate transporter 8<br>Monocarboxylate transporter 8<br>Monocarboxylate transporter 8<br>Monocarboxylate transporter 8<br>Monocarboxylate transporter 8                                                                                                                                                                                                                                                                                                                                                                                                                                                                                                                                                                                                                                                                                                                                                                                                                                                                                                                                                                                                                                              | Mus musculus (Mouse)<br>Rattus norvegicus (Rat)<br>Danio rerio (Zebrafish)<br>Gallus gallus (Chicken)<br>Xenopus laevis (African clawed frog)                                                                                                                                                                                                                                                                                                                                                                                                                                                                                                                                                                                                                                                                                                                                                                                                                                                                                                                                                                                                                                                                                                             |
| <u><b>hsMCT8 versus hsMCTs</b></u><br>NM_003051.4<br>NM_001270623.2<br>NM_013356.3<br>NM_004207.4<br>NM_004696.3<br>NM_004695.4<br>NM_004694.5                                                                                                                                                                                                                                                                                     | Monocarboxylate transporter 1<br>Monocarboxylate transporter 2<br>Monocarboxylate transporter 3<br>Monocarboxylate transporter 4<br>Monocarboxylate transporter 5<br>Monocarboxylate transporter 6<br>Monocarboxylate transporter 7                                                                                                                                                                                                                                                                                                                                                                                                                                                                                                                                                                                                                                                                                                                                                                                                                                                                                                                                                                            | Homo sapiens (Human)<br>Homo sapiens (Human)<br>Homo sapiens (Human)<br>Homo sapiens (Human)<br>Homo sapiens (Human)<br>Homo sapiens (Human)<br>Homo sapiens (Human)                                                                                                                                                                                                                                                                                                                                                                                                                                                                                                                                                                                                                                                                                                                                                                                                                                                                                                                                                                                                                                                                                      |

|                |                                |                      |
|----------------|--------------------------------|----------------------|
| NM_194298.3    | Monocarboxylate transporter 9  | Homo sapiens (Human) |
| NM_018593.5    | Monocarboxylate transporter 10 | Homo sapiens (Human) |
| NM_001370549.1 | Monocarboxylate transporter 11 | Homo sapiens (Human) |
| NM_213606.4    | Monocarboxylate transporter 12 | Homo sapiens (Human) |
| NM_201566.3    | Monocarboxylate transporter 13 | Homo sapiens (Human) |
| NM_152527.5    | Monocarboxylate transporter 14 | Homo sapiens (Human) |

**Sequences used for conservation analyses.**

**Supplementary Table 8.** Antibody Table.

| Target protein/<br>antigen | Antigen<br>sequence (if<br>known) | Name of AB | Species<br>raised<br>(P or M) | Manufacturer<br>(and catalogue<br>number) | Dilution<br>used for<br>WB | Dilution<br>used for<br>ICH | RRID        | Ref           |
|----------------------------|-----------------------------------|------------|-------------------------------|-------------------------------------------|----------------------------|-----------------------------|-------------|---------------|
| hsMCT8                     | AA 52-155                         | MCT8       | Rabbit<br>(P)                 | ATLAS<br>(HPA003353)                      | 1:2,000                    | 1:1,000                     | AB_1079343  | <sup>27</sup> |
| GAPDH                      |                                   | GAPDH      | Mouse<br>(M)                  | Millipore<br>(Mab 374)                    | 1:20,000                   |                             | AB_2107445  | <sup>28</sup> |
| ZO1                        |                                   | ZO1        | Mouse<br>(M)                  | Thermo Fisher<br>(33-9100)                |                            | 1:500                       | AB_2533147  | <sup>29</sup> |
| Rabbit<br>IgG              |                                   | IRDye800   | Goat                          | LI-COR (926-<br>32211)                    | 1:20,000                   |                             | AB_621843   | <sup>30</sup> |
| Mouse<br>IgG               |                                   | IRDye680   | Goat                          | LI-COR (926-<br>68020)                    | 1:20,000                   |                             | AB_10706161 | <sup>31</sup> |
| Rabbit<br>IgG              |                                   | Alexa 488  | Goat                          | Thermo Fisher<br>(A11008)                 |                            | 1:1,000                     | AB_143165   | <sup>32</sup> |
| Mouse<br>IgG               |                                   | Alexa 633  | Goat                          | Thermo Fisher<br>(A21050)                 |                            | 1:1,000                     | AB_2535718  | <sup>33</sup> |

*AB: antibody; GAPDH: glyceraldehyde-3-phosphate dehydrogenase; ZO-1: zona occludens 1; P: polyclonal antibody; M: monoclonal antibody; WB: Western Blot ; ICH: immunohistochemistry*

## Supplementary Figures

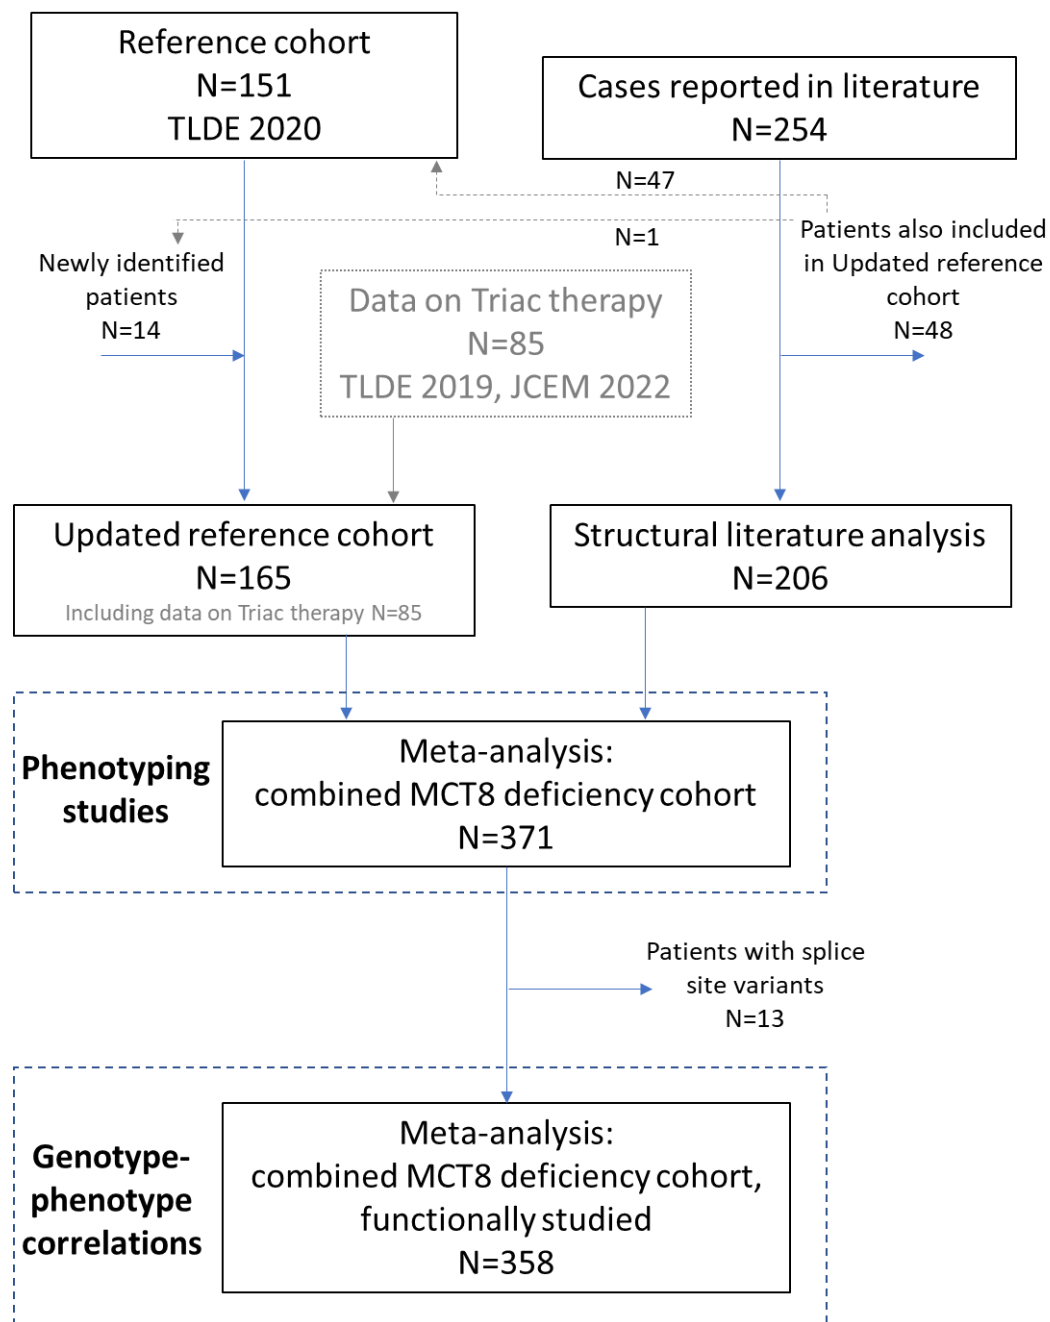

**Supplementary Fig. 1.** Flow diagram of the study. TLDE 2019 refers to <sup>34</sup> TLDE 2020 refers to <sup>25</sup> and JCEM 2022 refers to <sup>35</sup>.



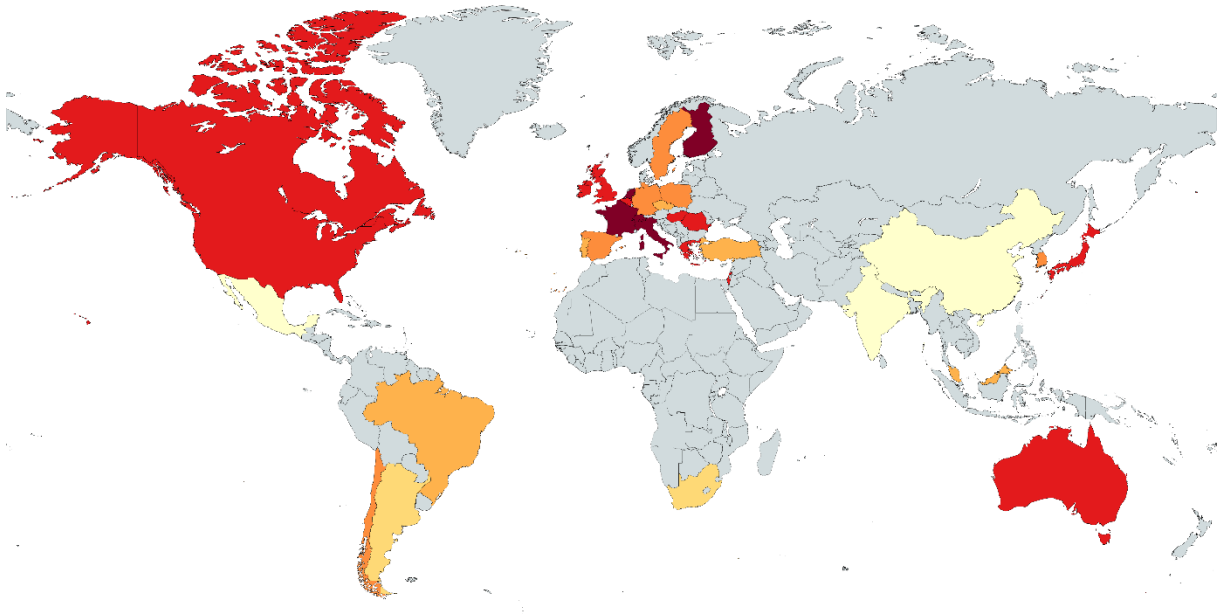

**Supplementary Fig. 2.** Distribution of patients included in the meta-analysis. Light yellow indicates <0.1 patients per 10 million residents; yellow indicates 0.1 – 0.5 patients per 10 million residents; light orange indicates 0.5 – 1 patients per 10 million residents; orange indicates 1 – 2 patients per 10 million residents; red indicates 2 – 5 patients per 10 million residents; dark red indicates >5 patients per 10 million residents <sup>36, 37</sup>.

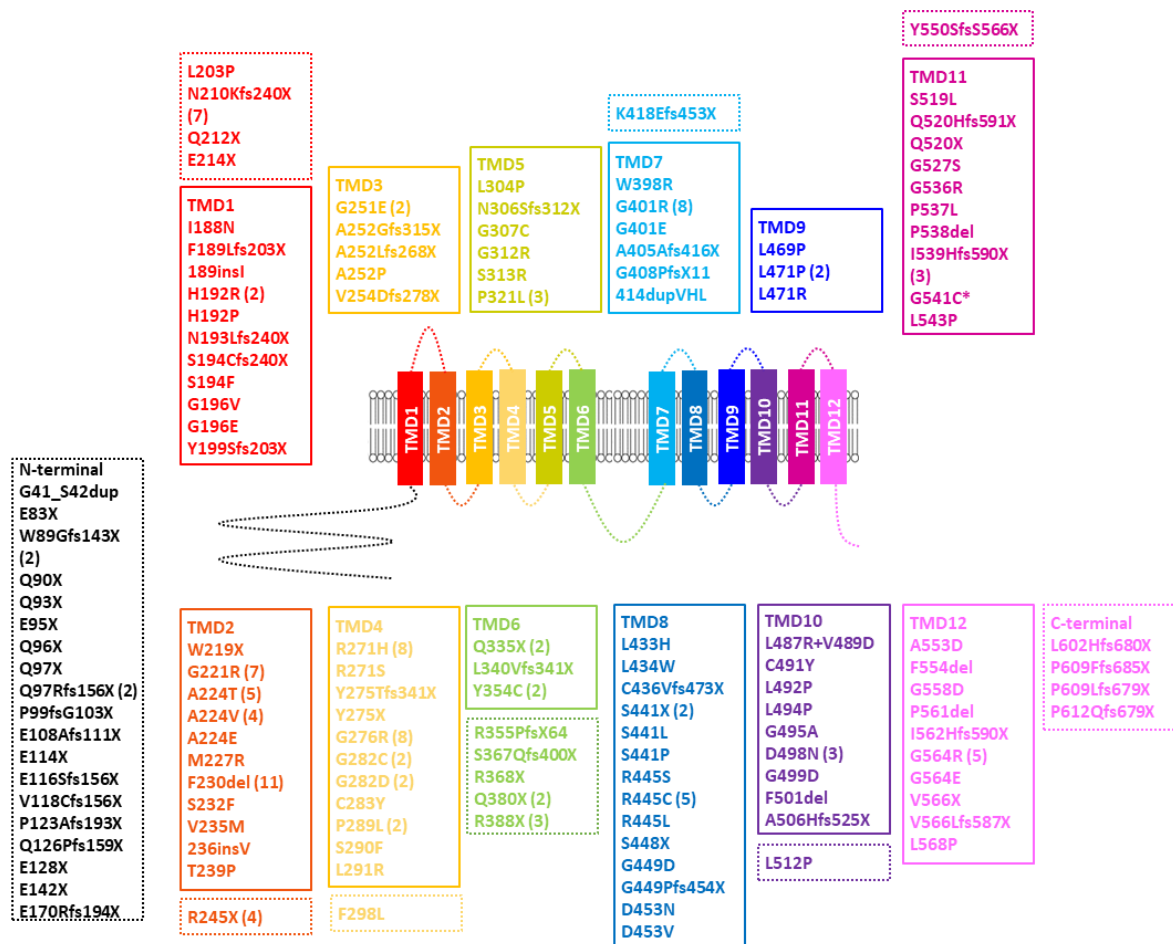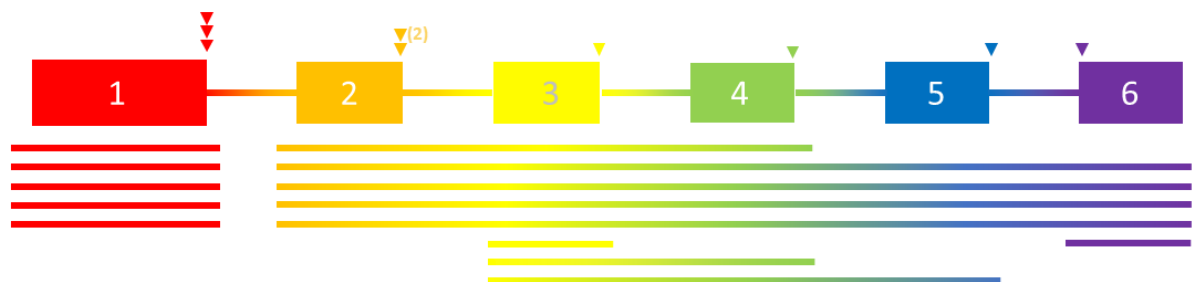

**Supplementary Fig. 3.** Overview of unique genetic variants identified in the *SLC16A2* gene encoding MCT8 and investigated in this study. (A) Missense, nonsense and frameshift variants and (B) deletions (lines) and splicing variants (arrow heads). Mutations that occurred >1 in independent families are indicated with a frequency between brackets. Dashed boxes represent variants in the intracellular or extracellular domains. \* also results in a splicing variant.

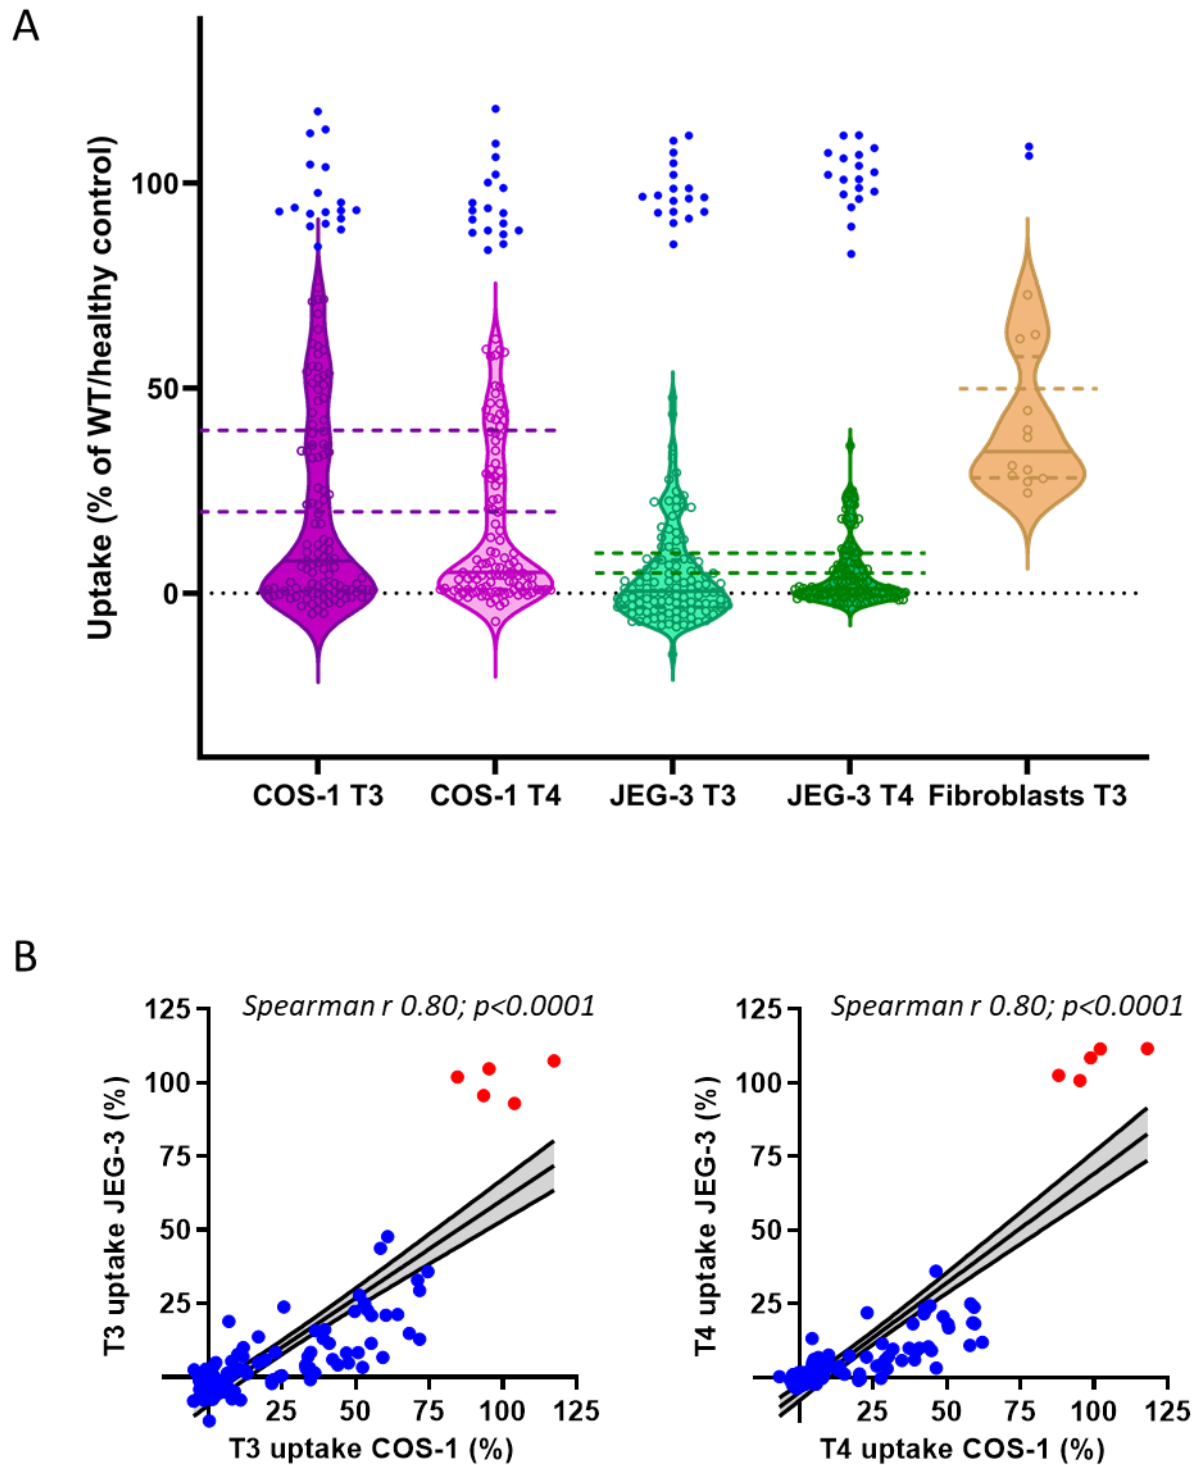

**Supplementary Fig. 4.** (A) Distribution of T3 and T4 transport capacity of MCT8 variants shown as residual transport function (100% = WT MCT8, or healthy control fibroblasts) in different cells. All variants were introduced in an MCT8 expression vector and functionally evaluated, except for variants that lead to a premature truncation before transmembrane domain 12 as such truncations have been

previously shown to be fully inactive (1, 2). WT and mutant MCT8 were expressed in COS-1 and JEG-3 (lacking endogenous MCT8 expression) cells. After incubation with 1 nM T3 or 1 nM T4 for 30 minutes, cellular uptake of radio-labelled hormone was measured. Uptake values were corrected for mock-transfected cells, and for protein content in the lysates (for fibroblast studies). Variation in T3 uptake across variants was largest in COS-1 cells, leaving this model suitable to perform genotype-phenotype analyses. Variation in T4 uptake across variants was smallest in JEG-3 cells, leaving this model suitable as a first screen to distinguish benign from pathogenic variants. Dashed lines represent cut-off values for different LoF classes. For COS-1 cells: <20% (severe LoF), 20-40% (moderate LoF), >40% (mild LoF). For JEG-3 cells: <5% (severe LoF), 5-10% (moderate LoF), >10% (mild LoF). For fibroblasts: <50% (severe LoF), >50% (mild LoF). Blue dots represent data from benign non-synonymous missense variants. (B) Correlation plots of transport capacity of T3 (left panel) and T4 (right panel) between COS-1 and JEG-3 cells expressing WT or mutant MCT8. Blue dots represent data from patient-derived mutations; red dots represent data from benign non-synonymous missense variants. Exact P values are provided in Supplementary Data 1. Source data are provided as a Source Data file.

Serie 1

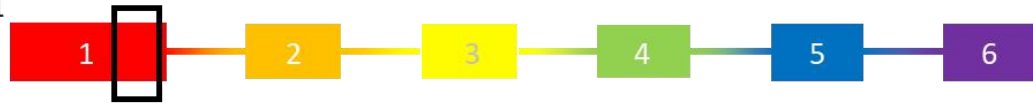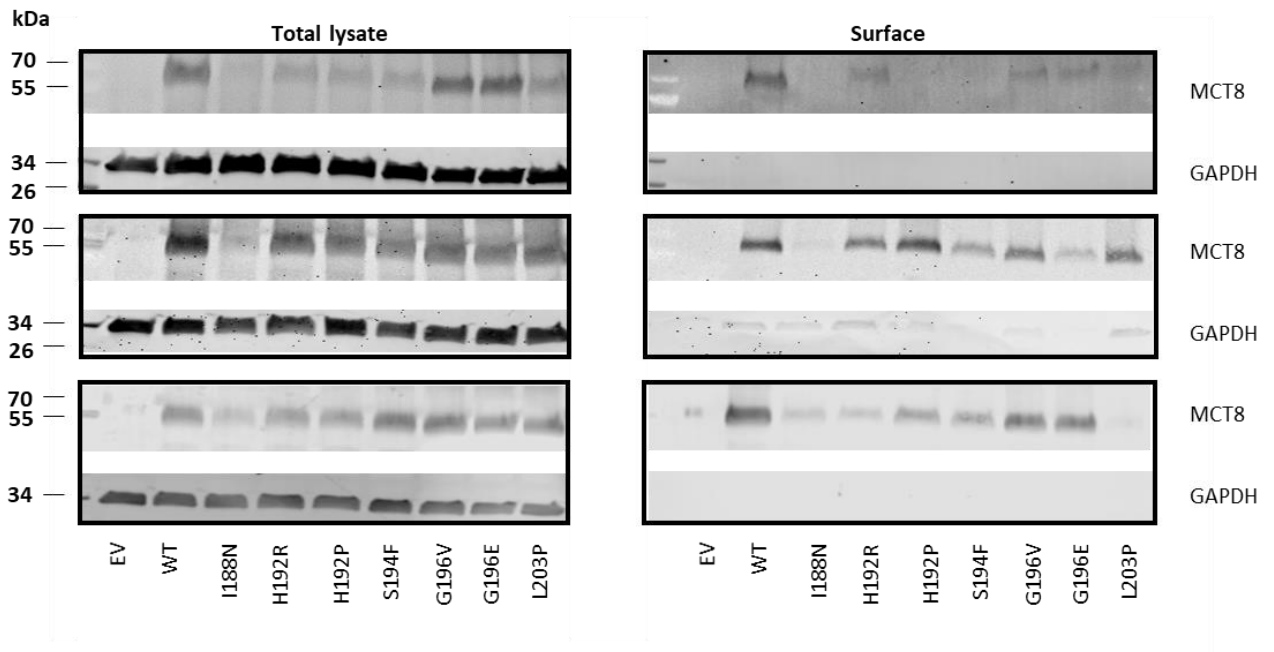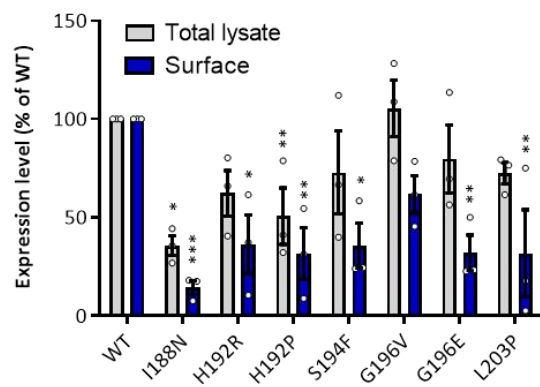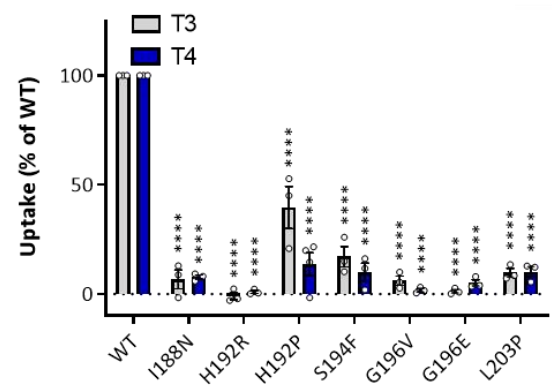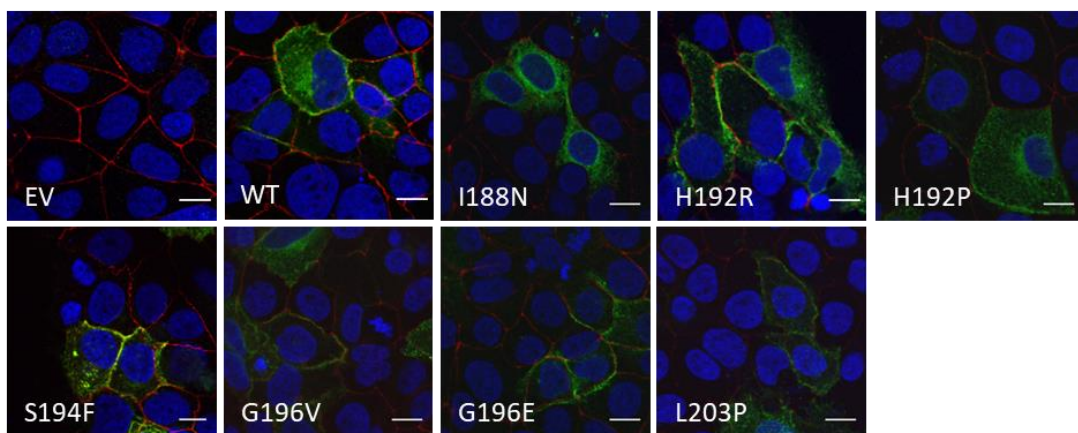

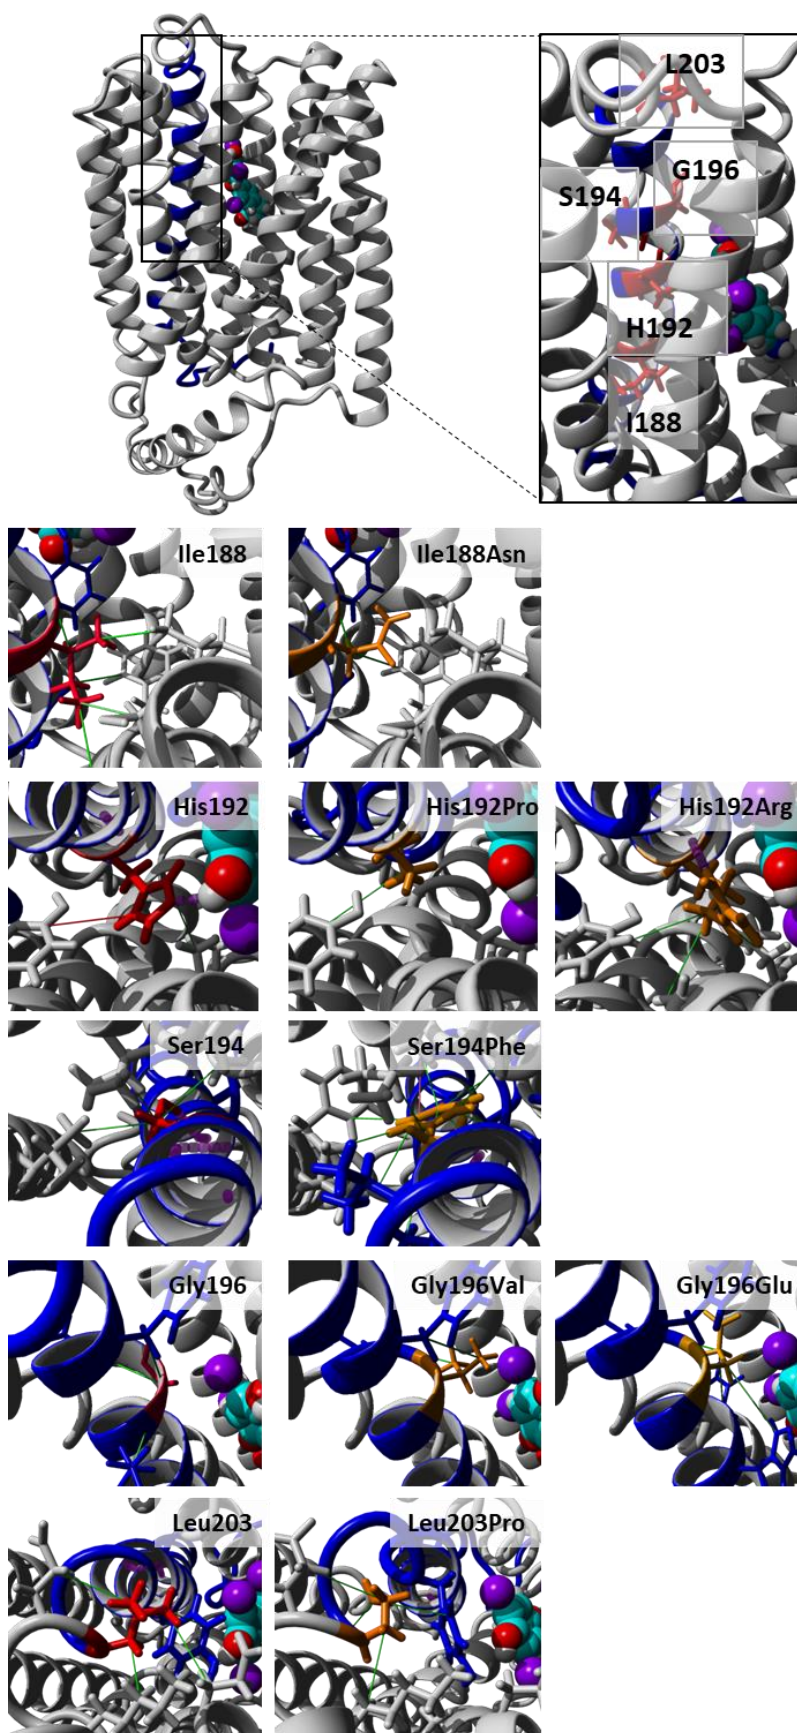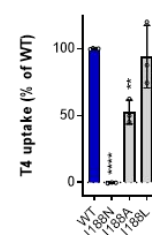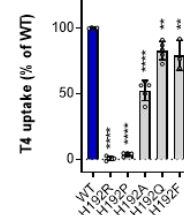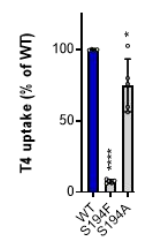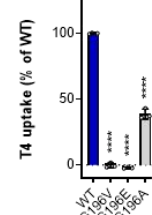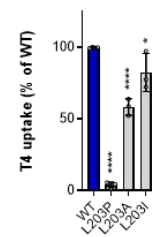



Serie 2

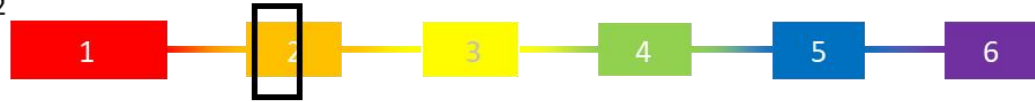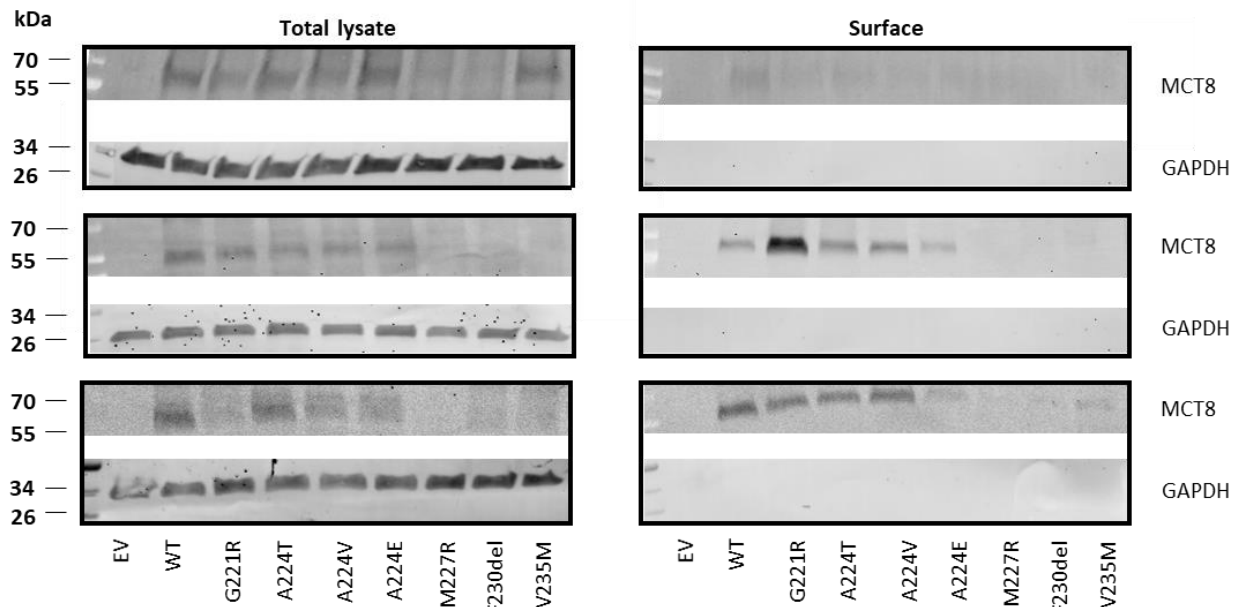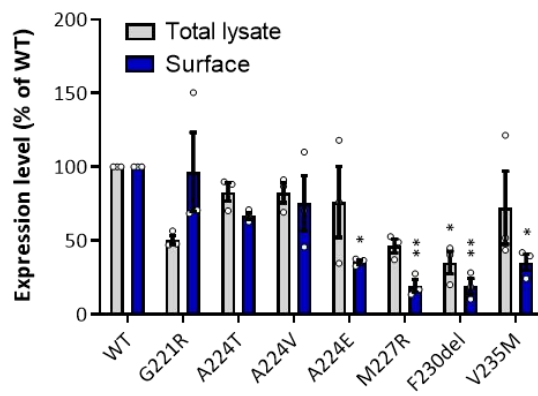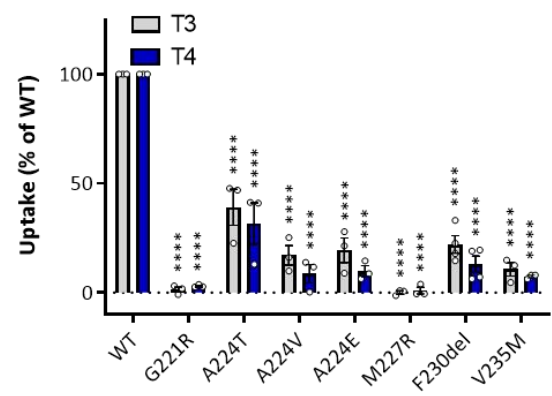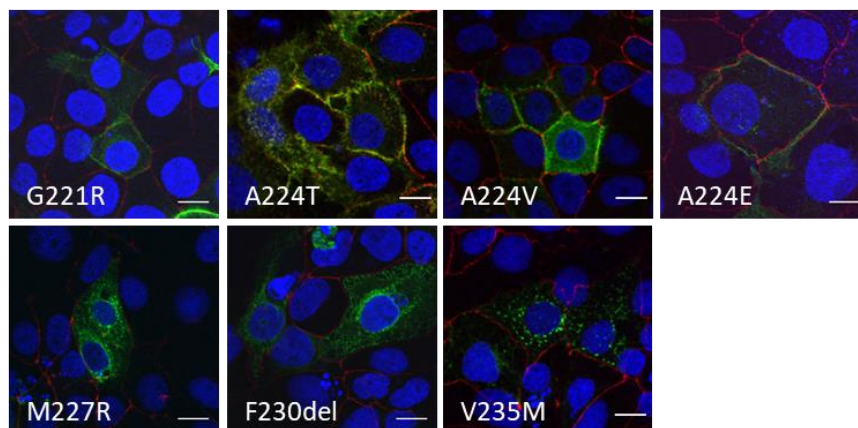

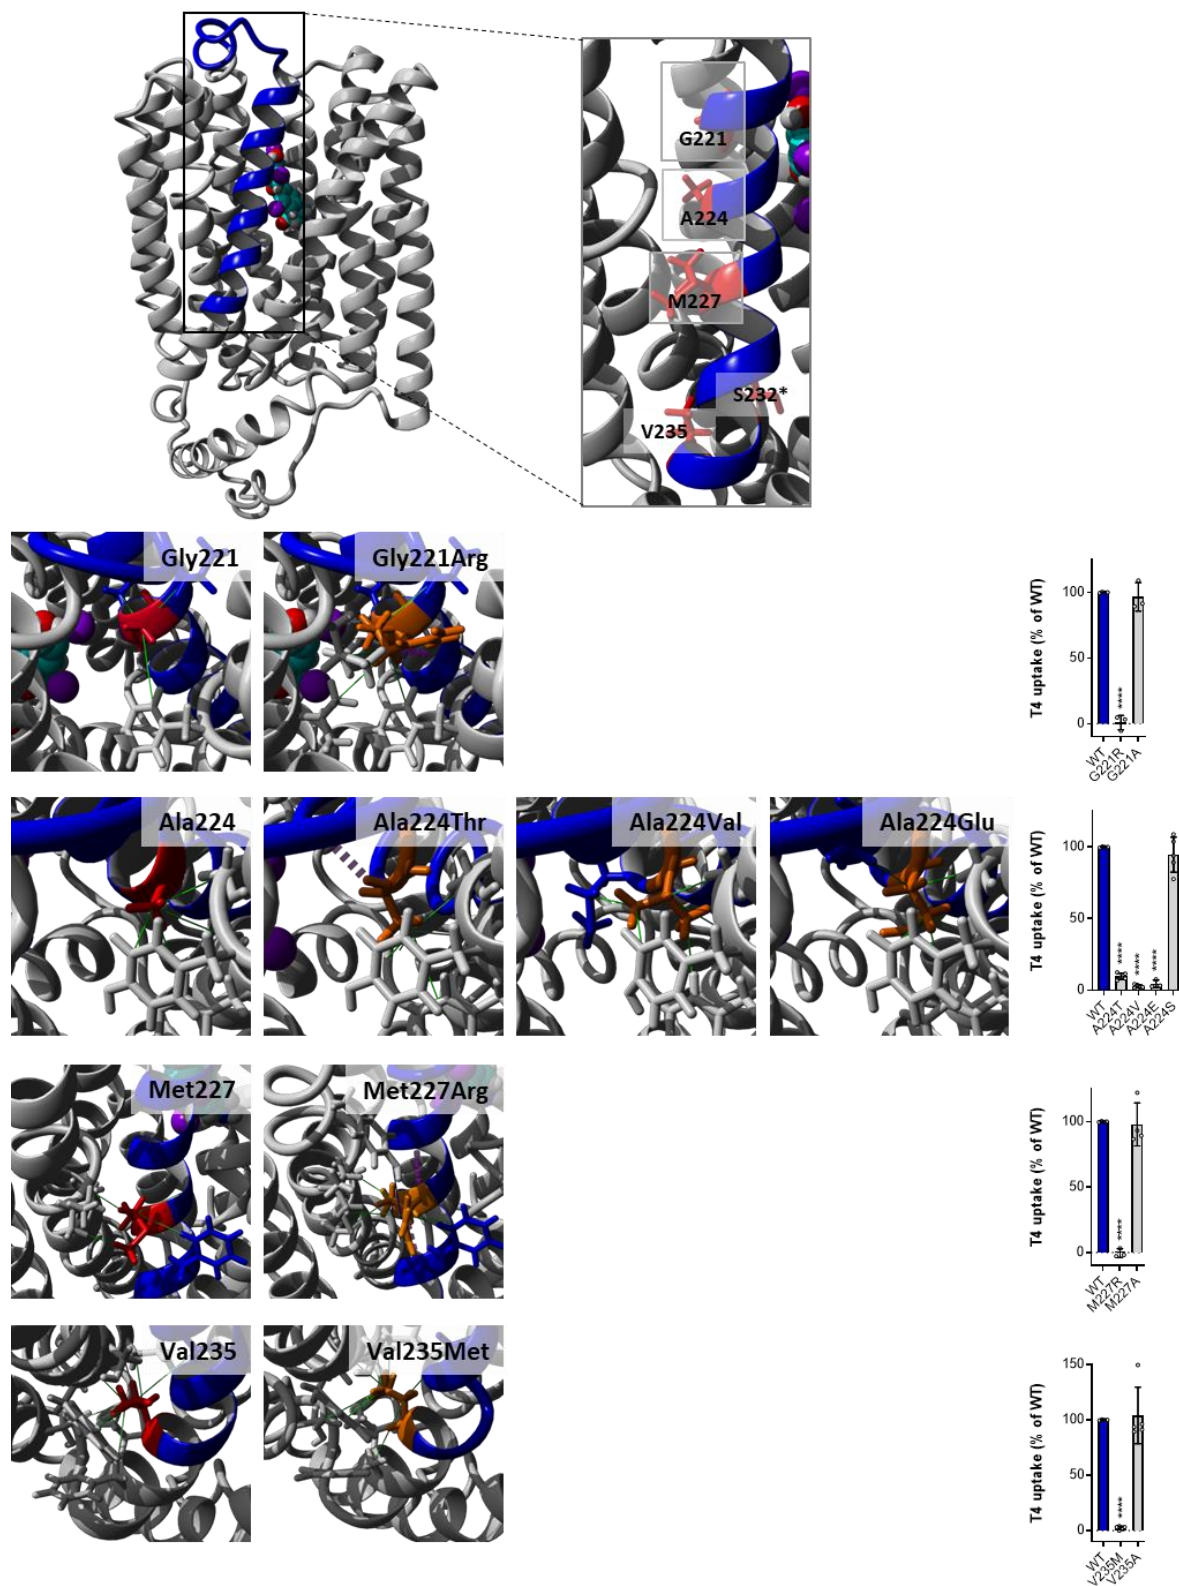



Serie 3

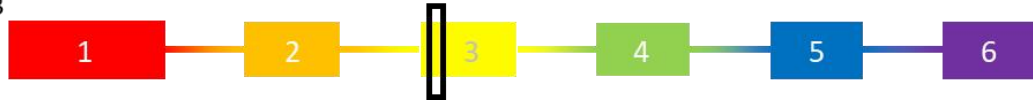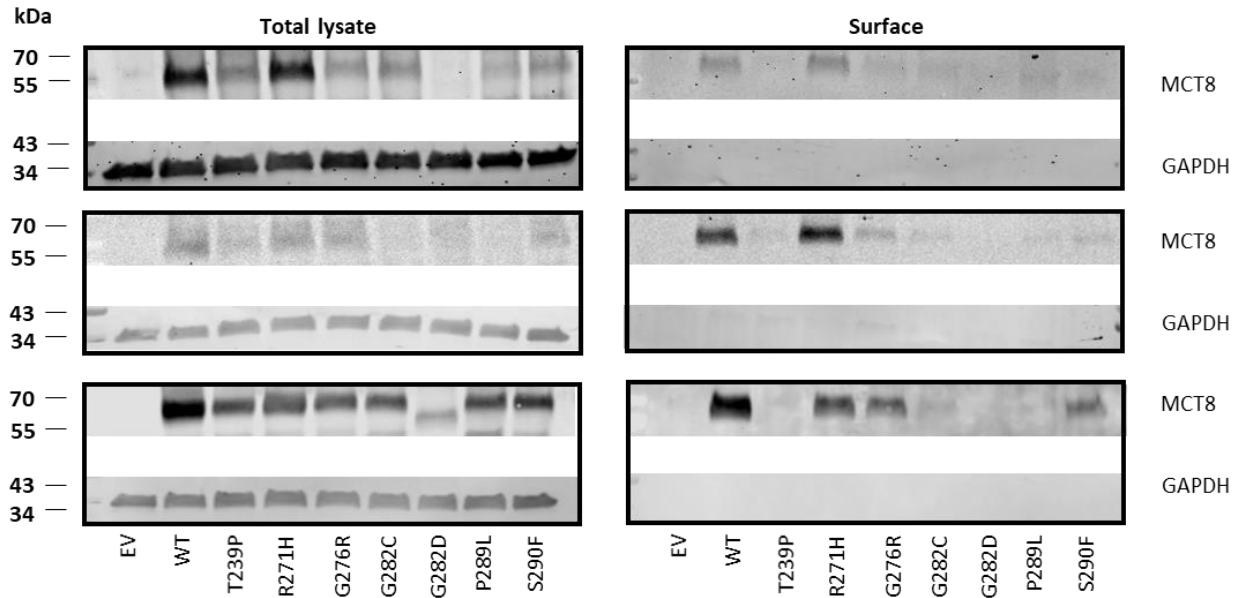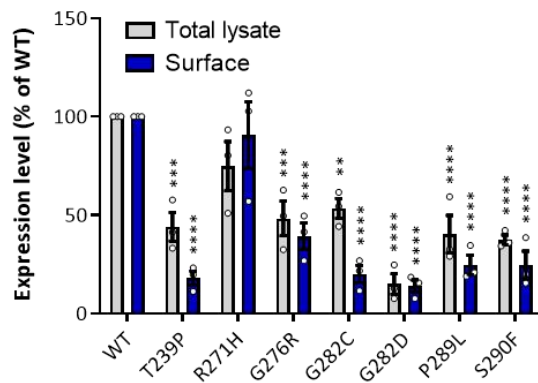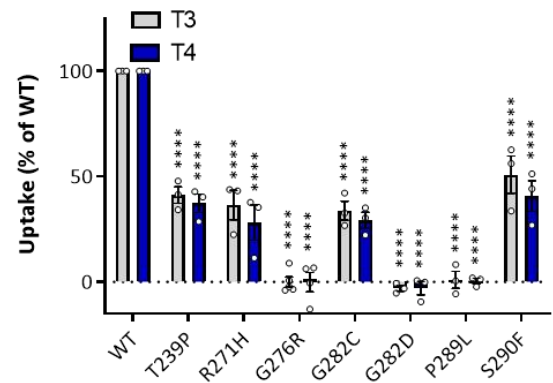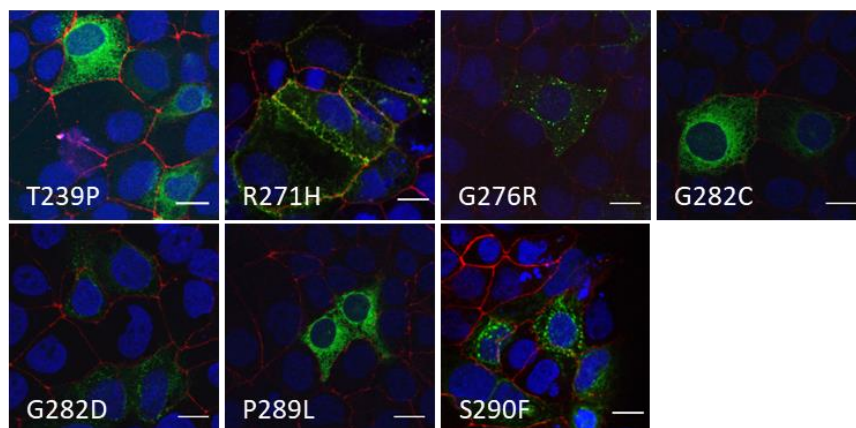

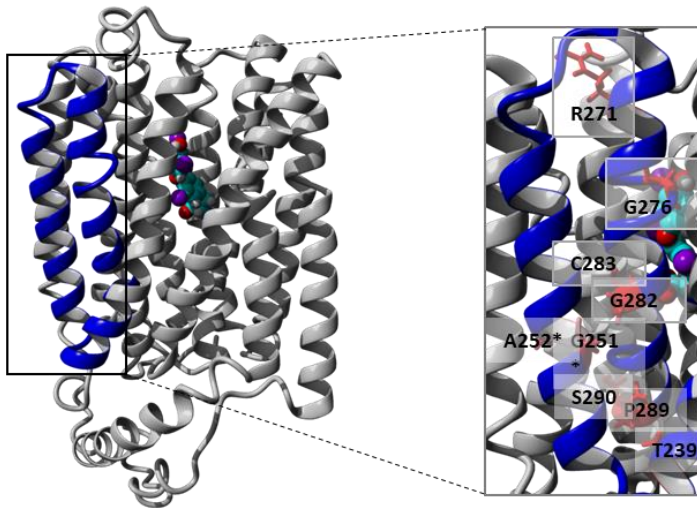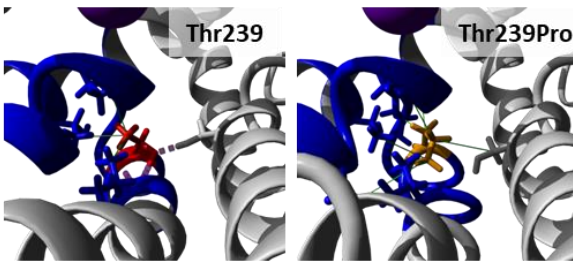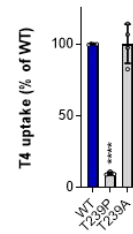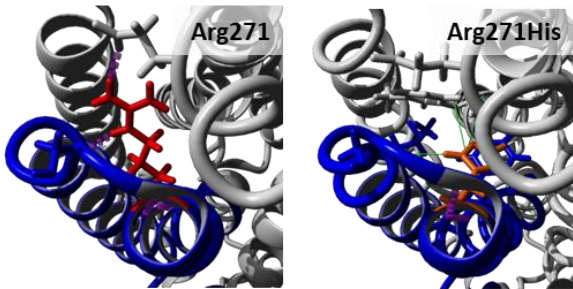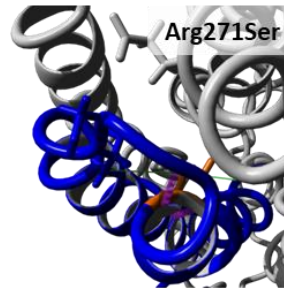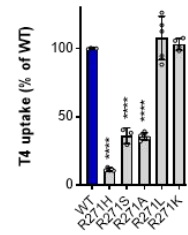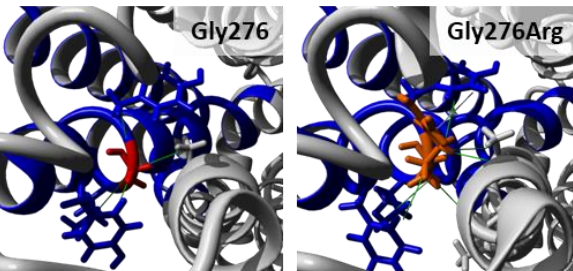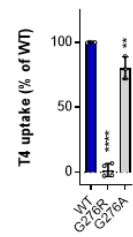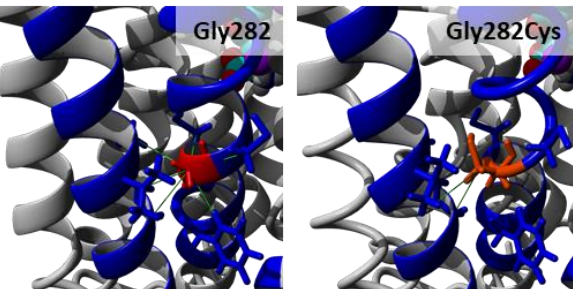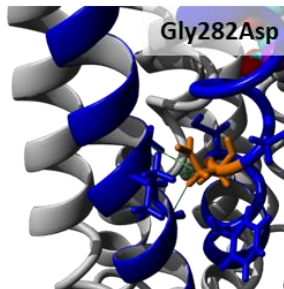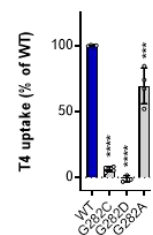

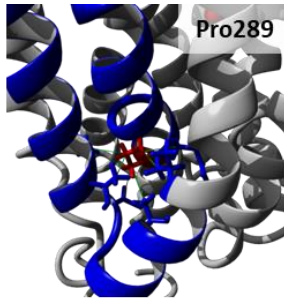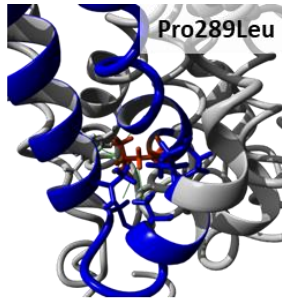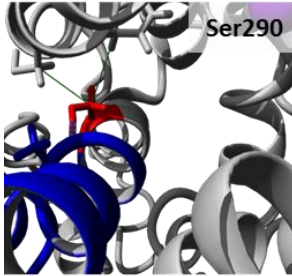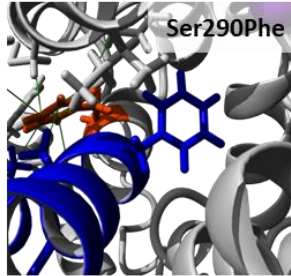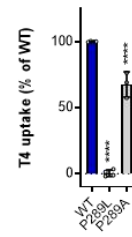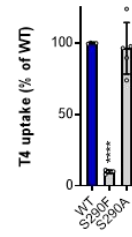

Serie 4

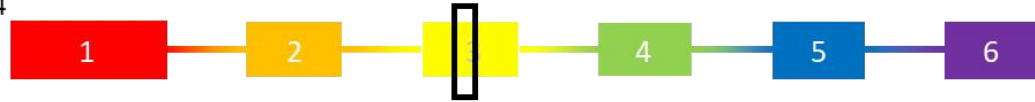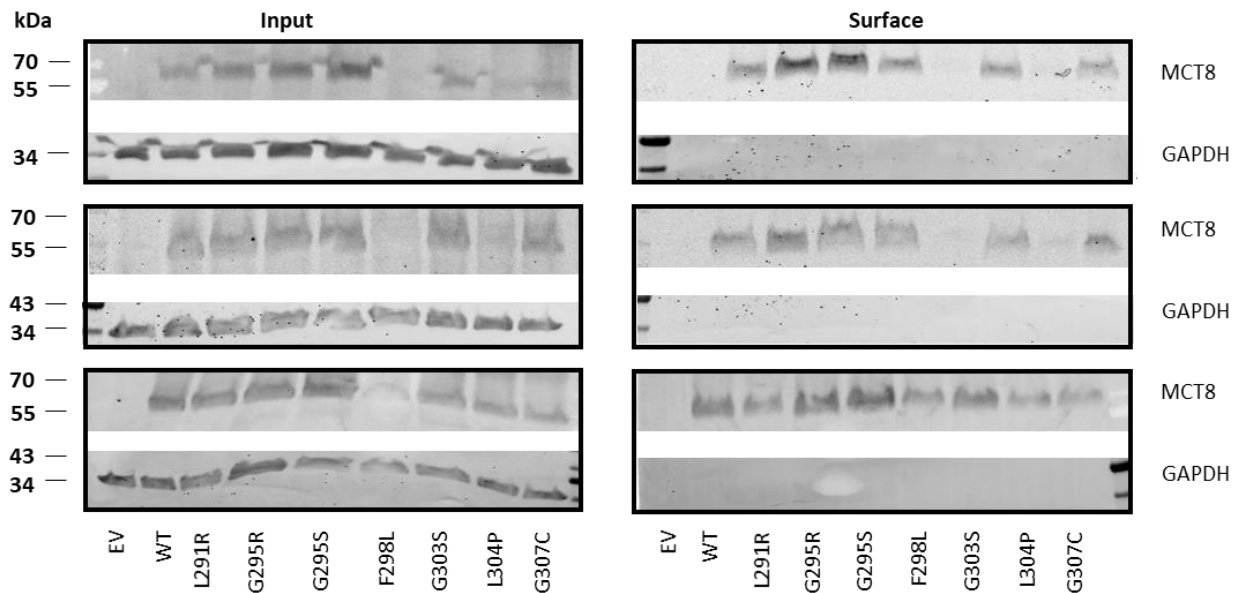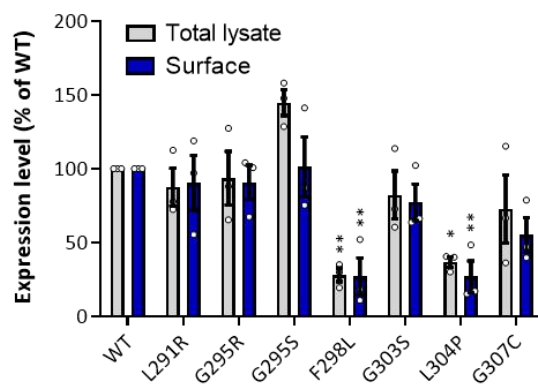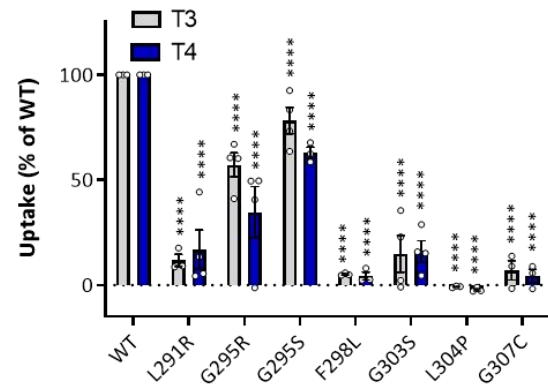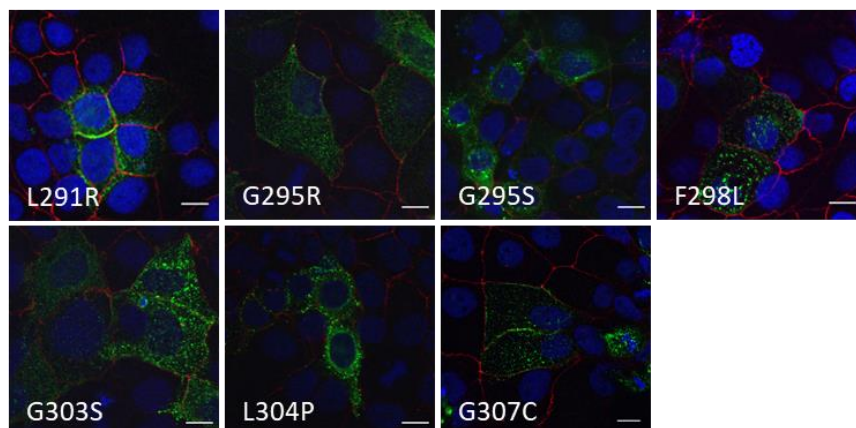



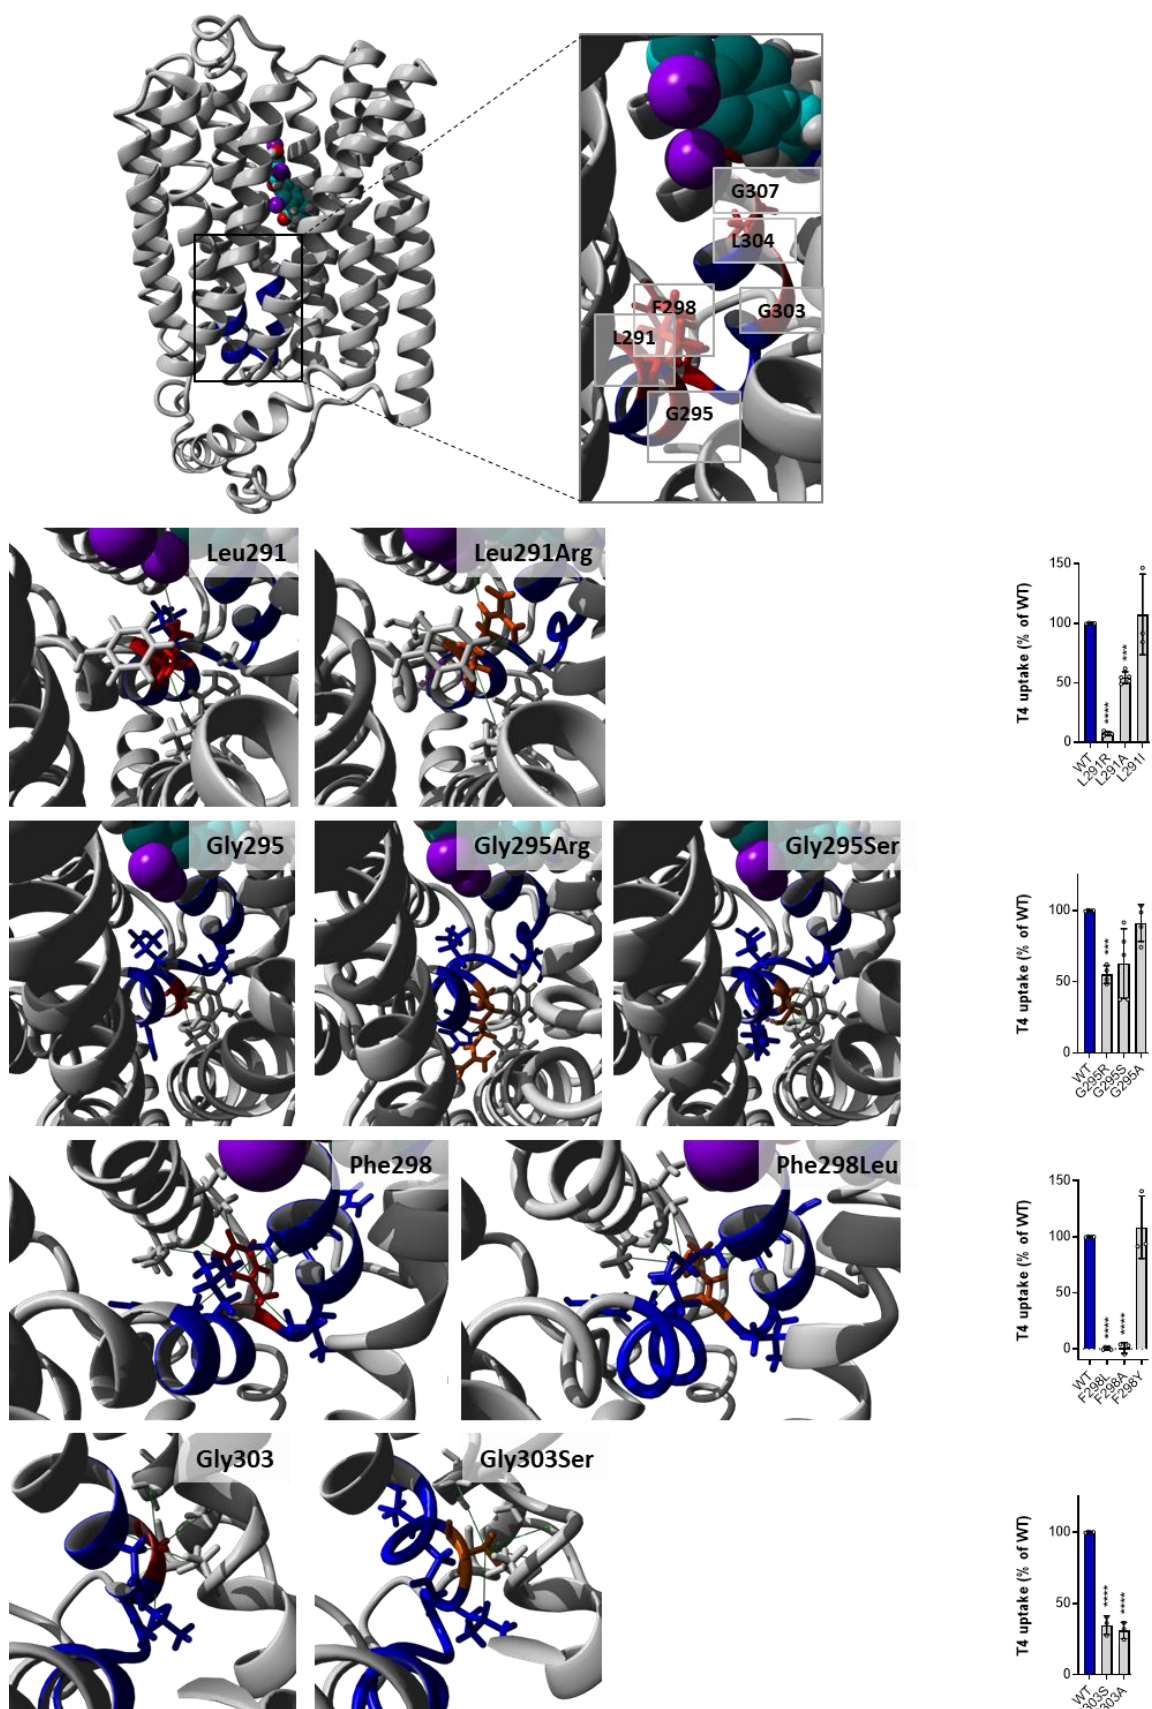

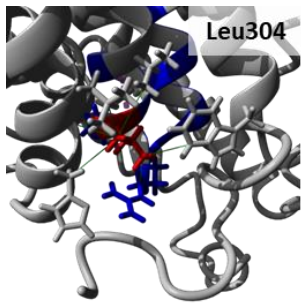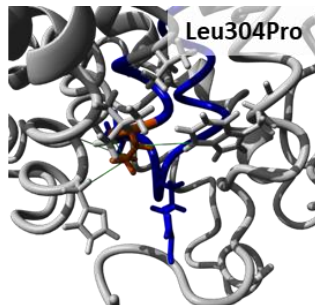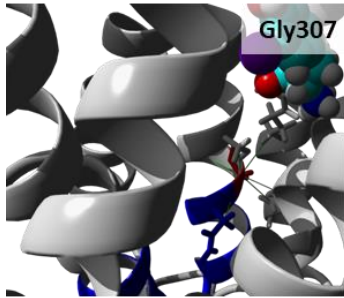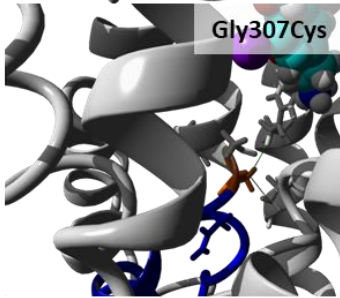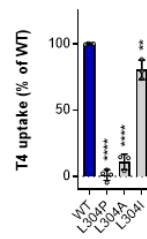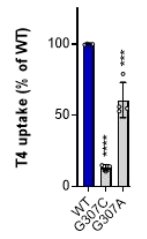

Serie 5

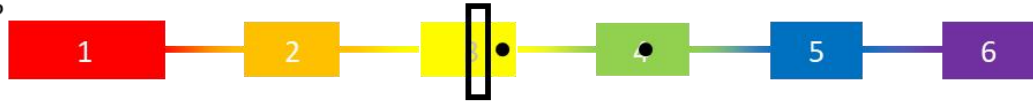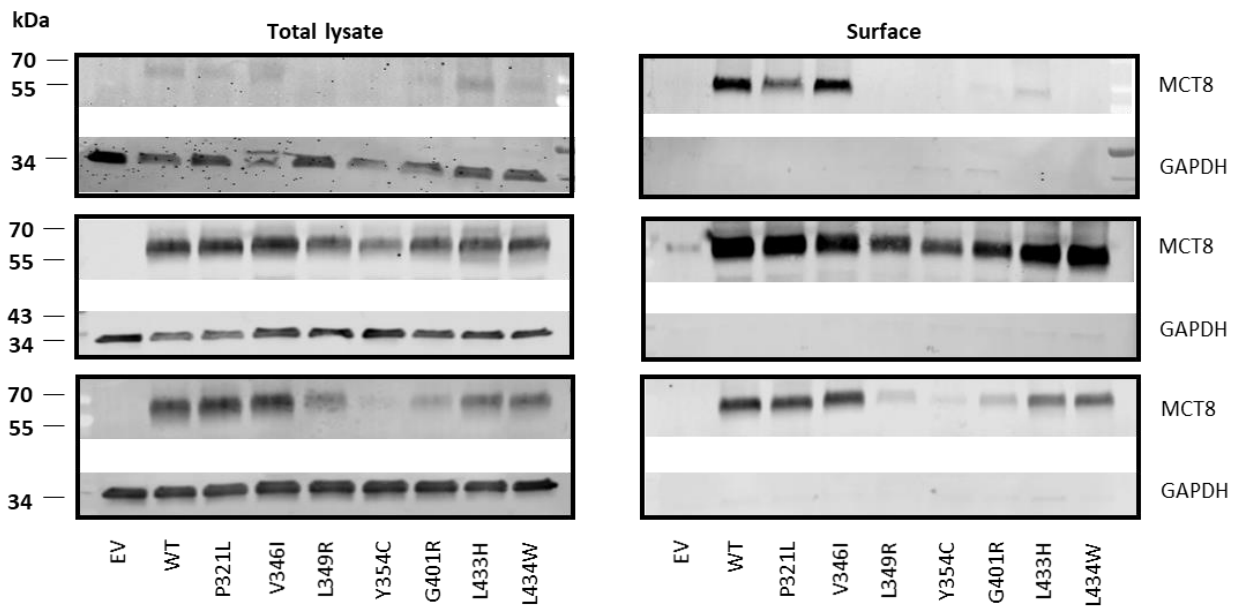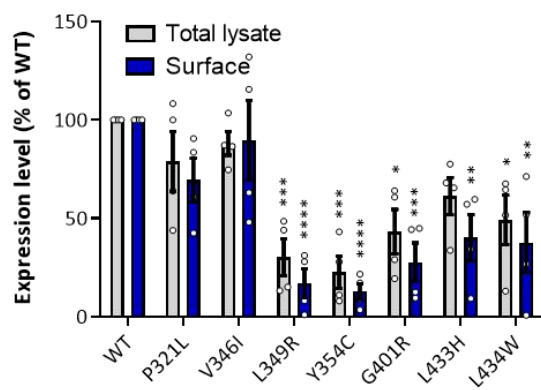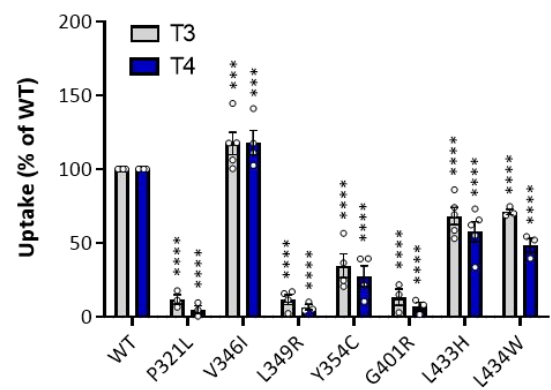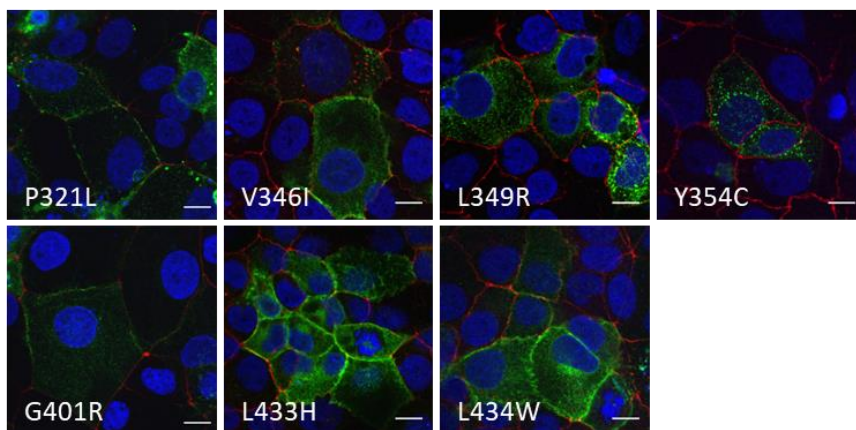



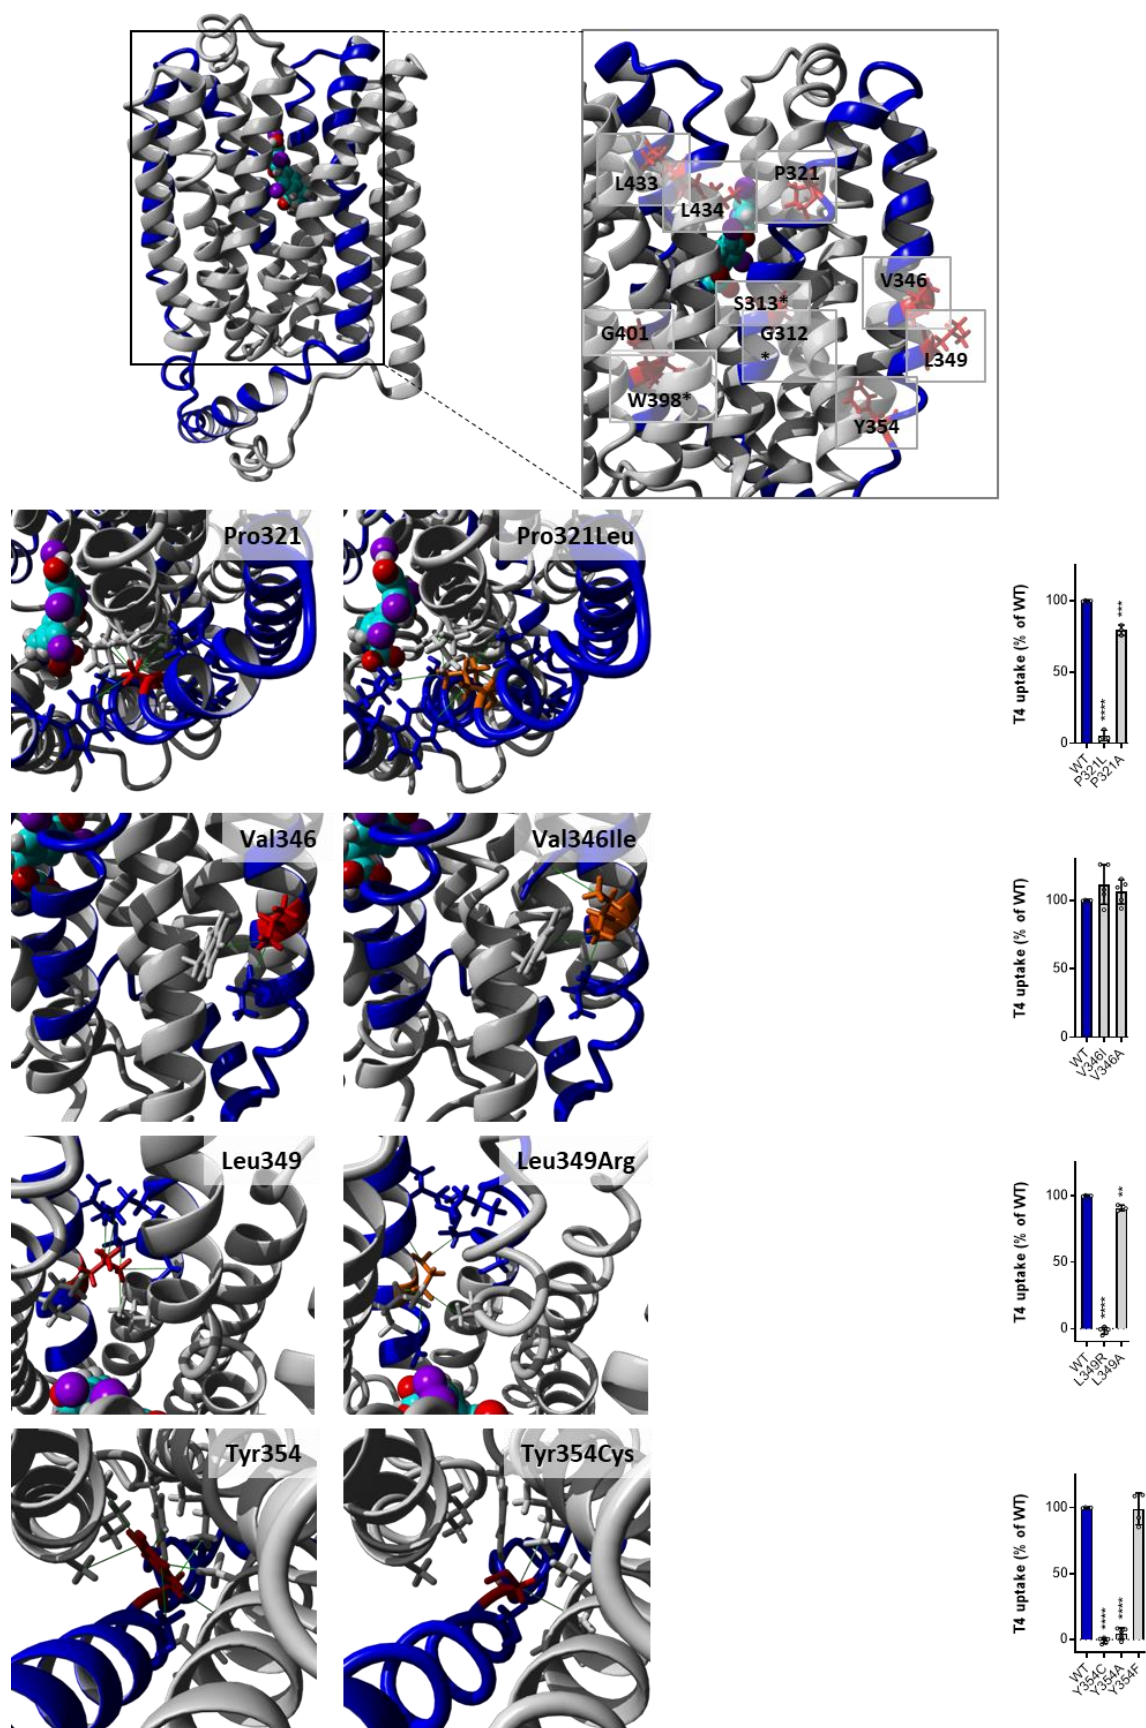



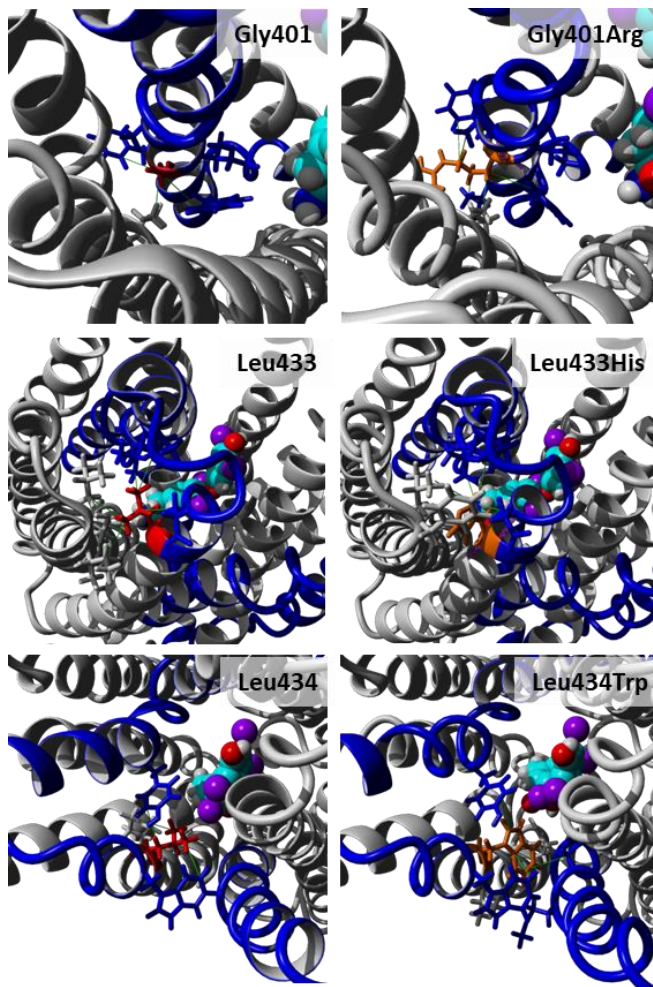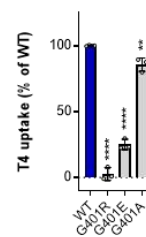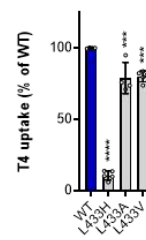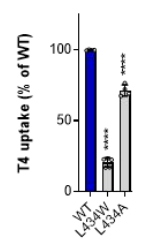

Serie 6

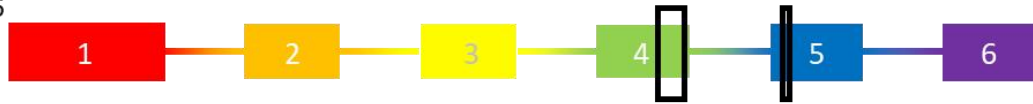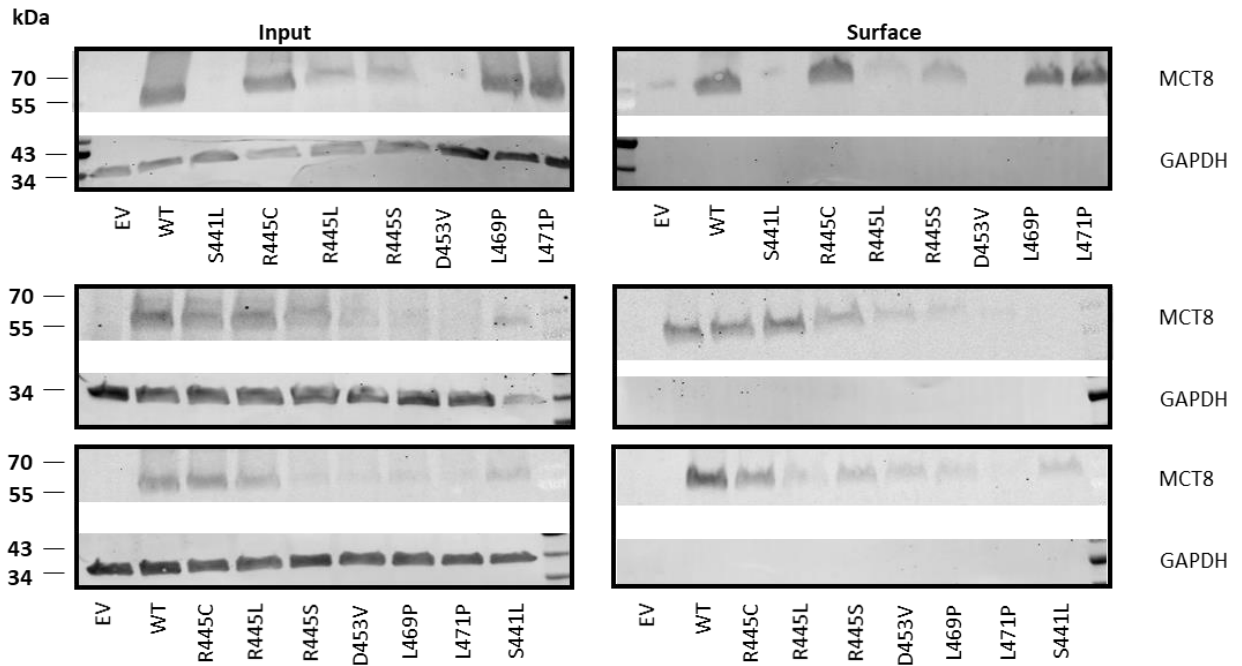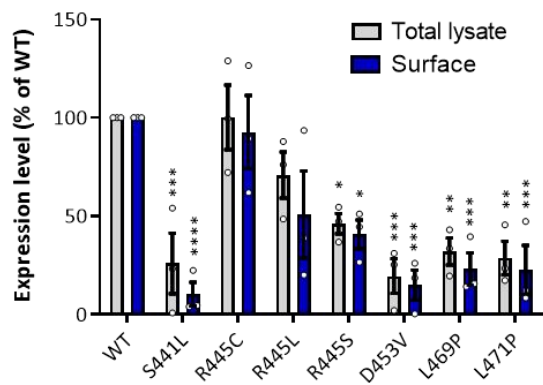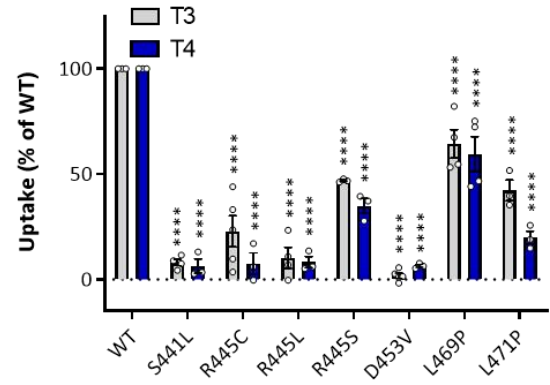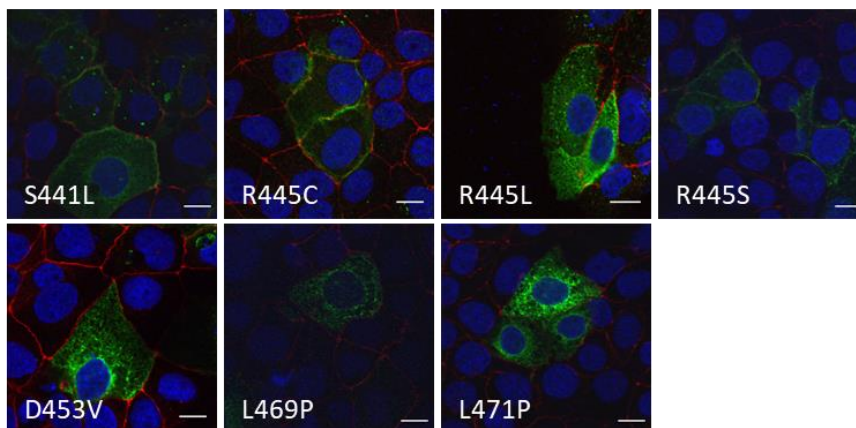

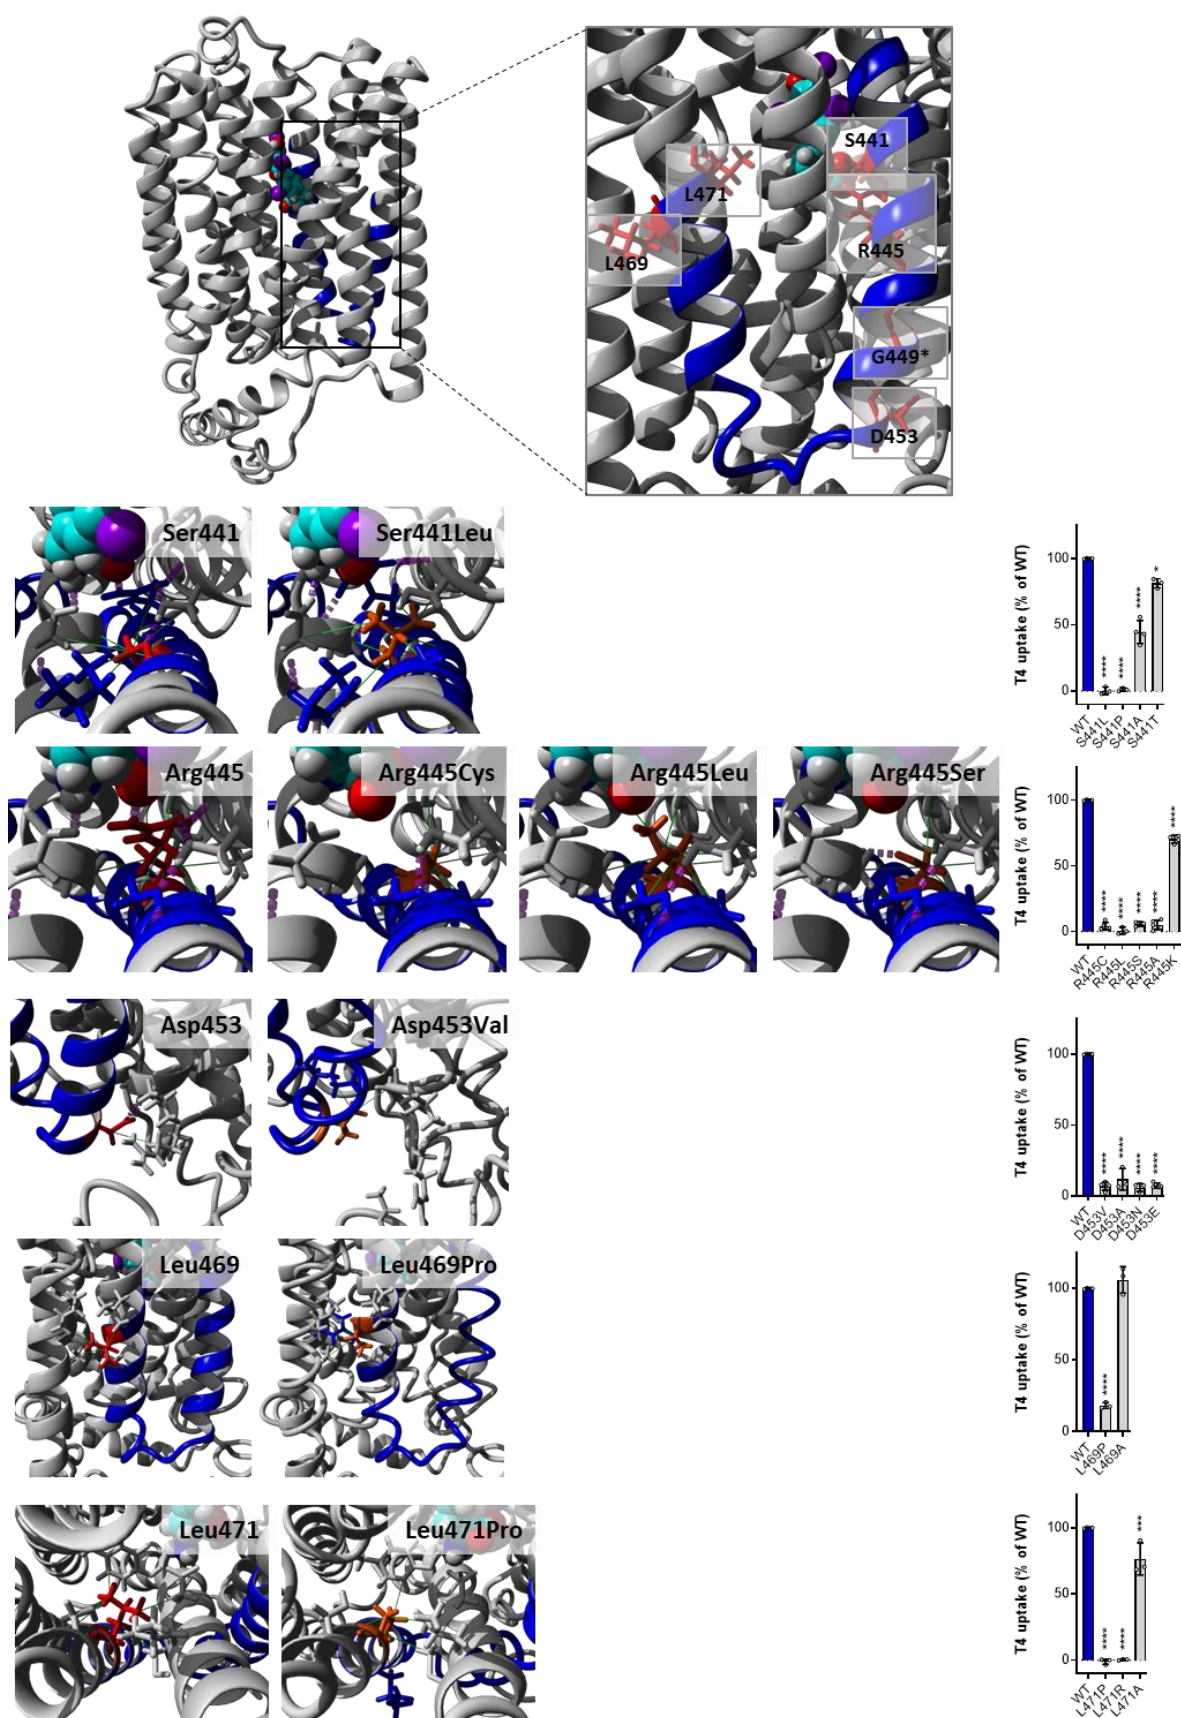

Serie 7

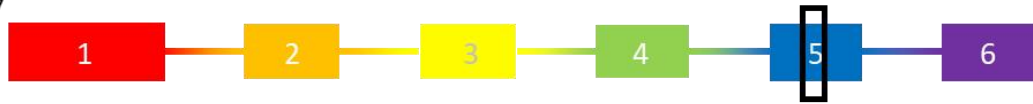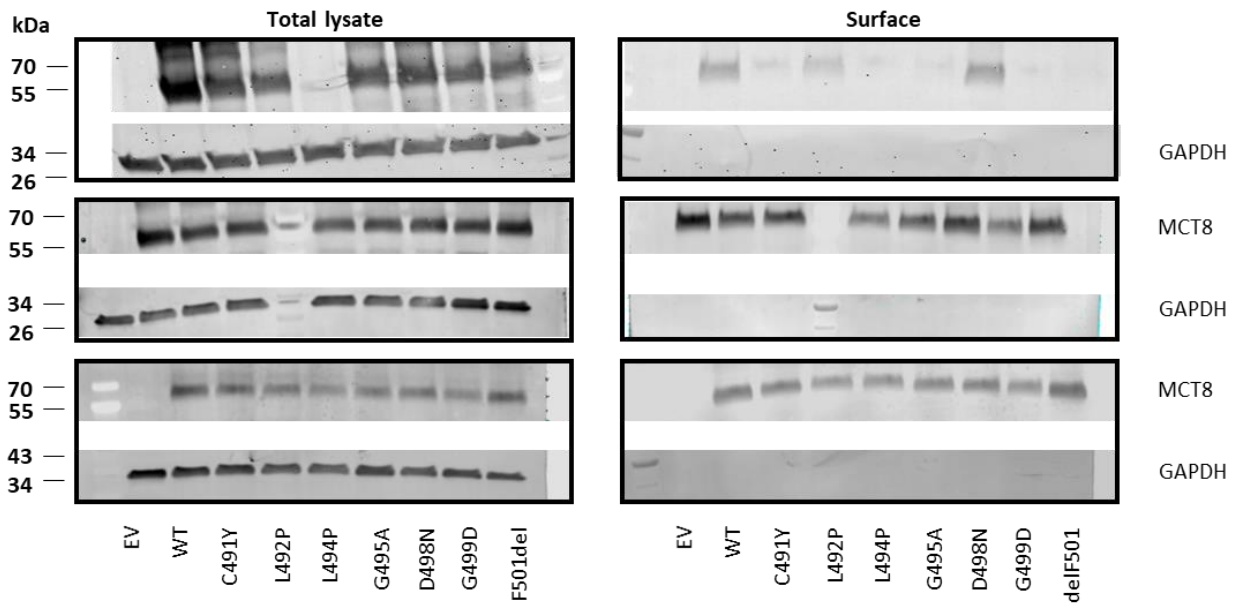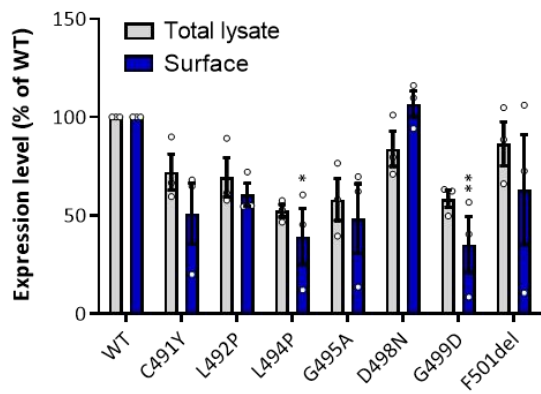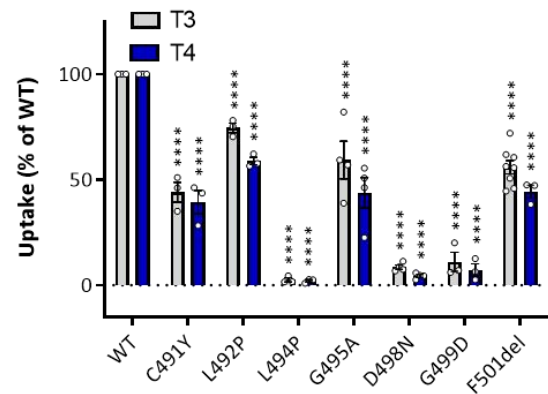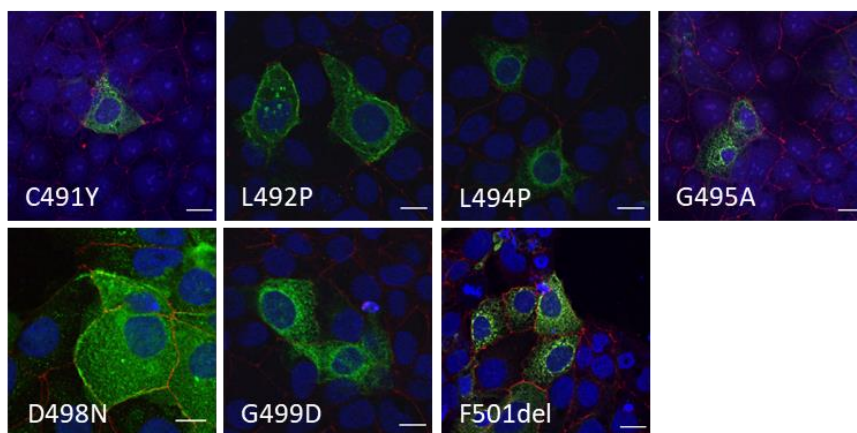



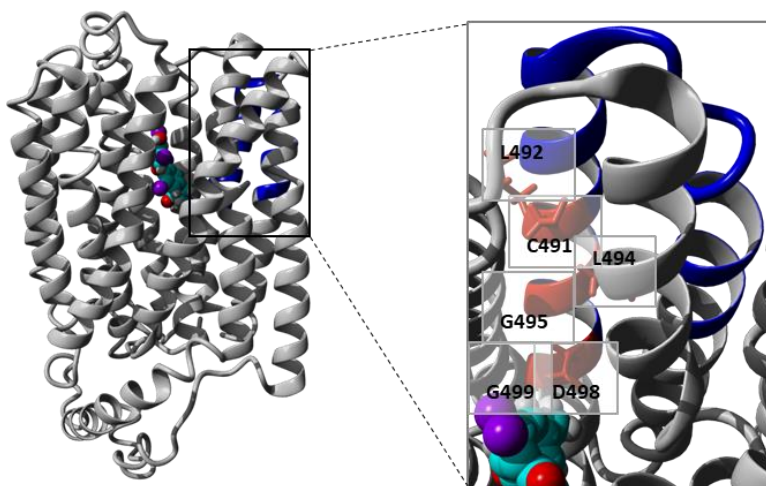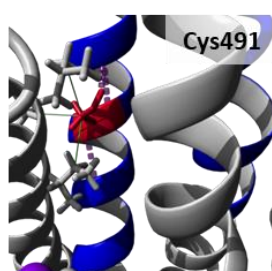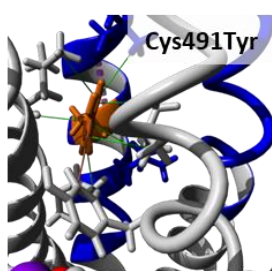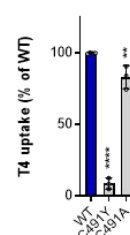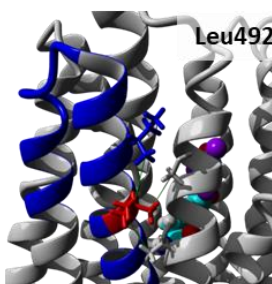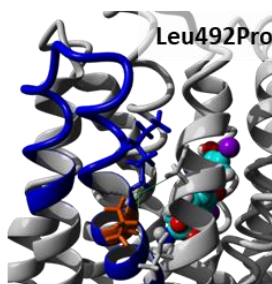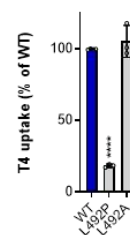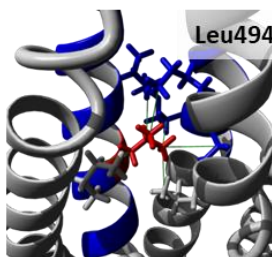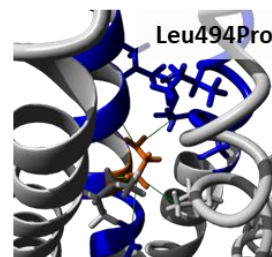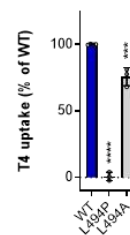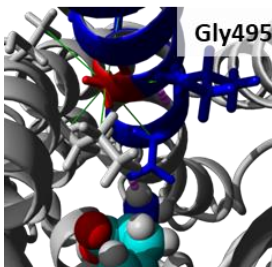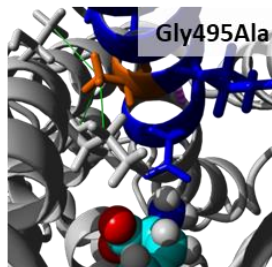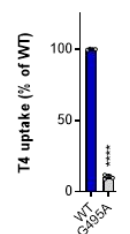

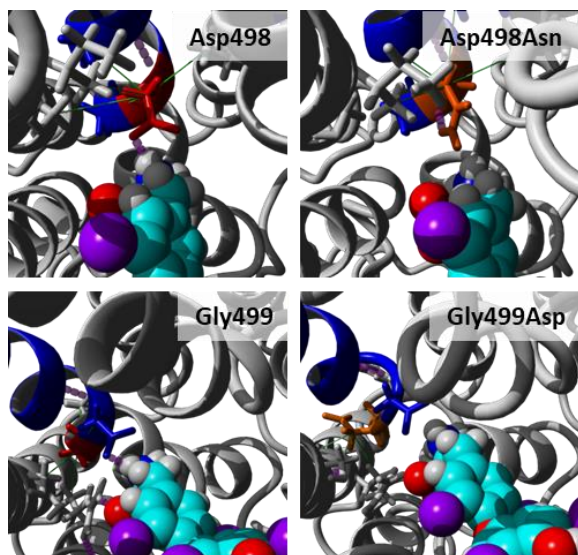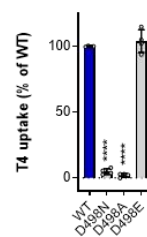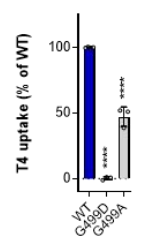

Serie 8

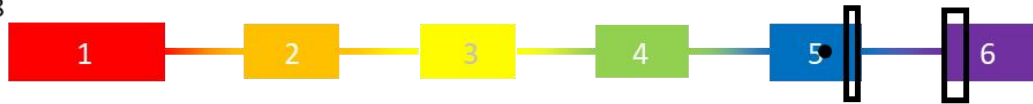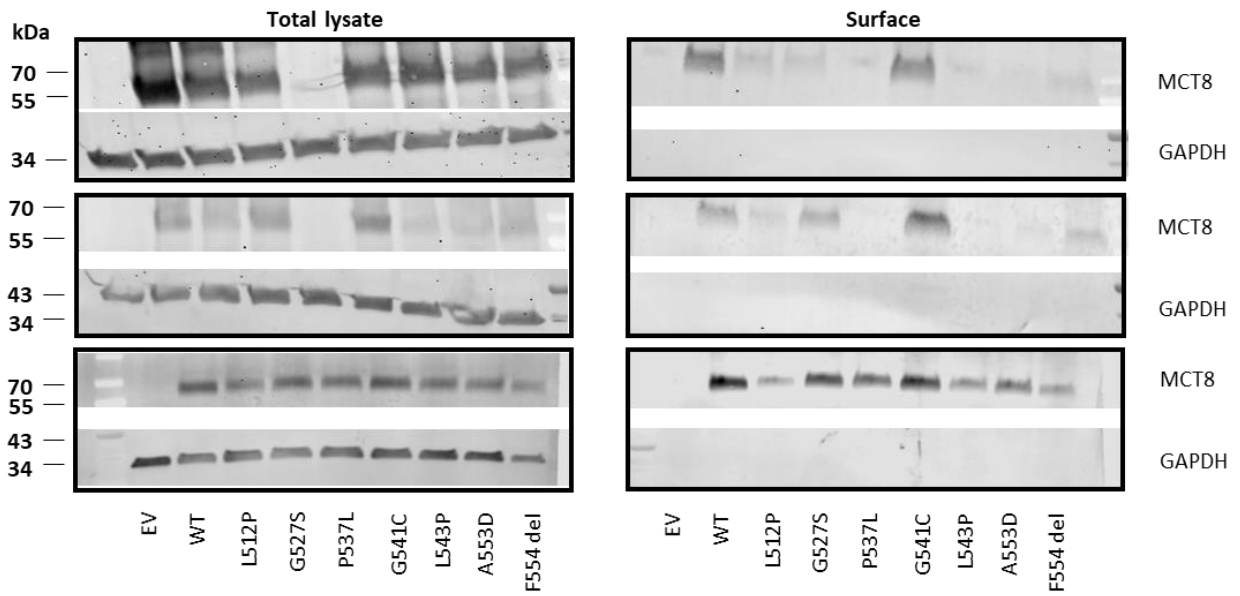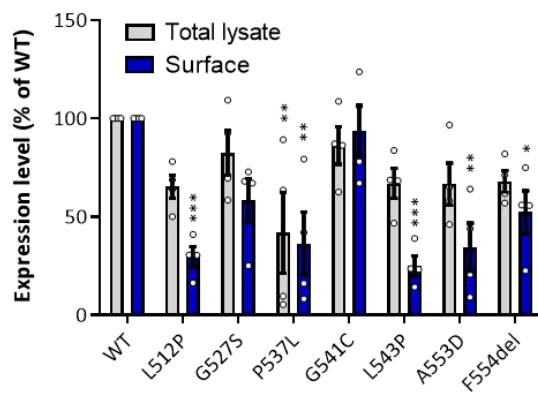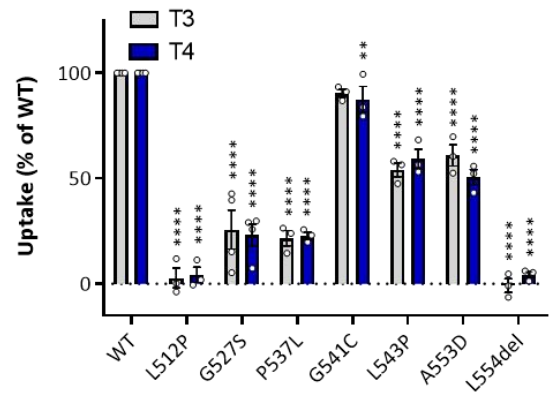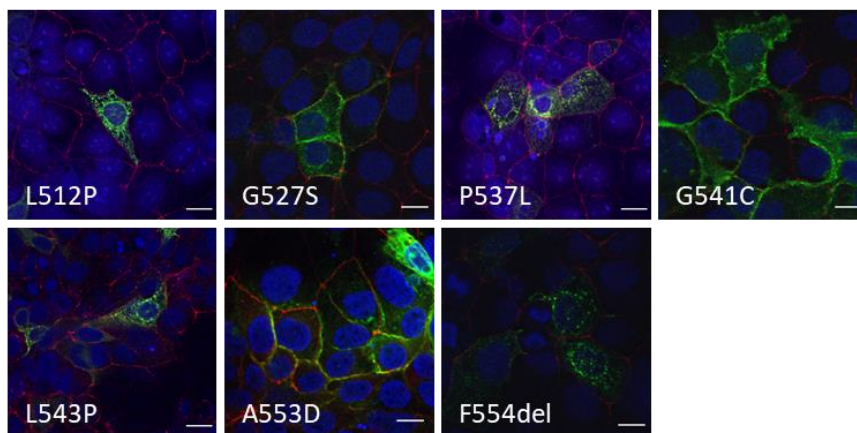

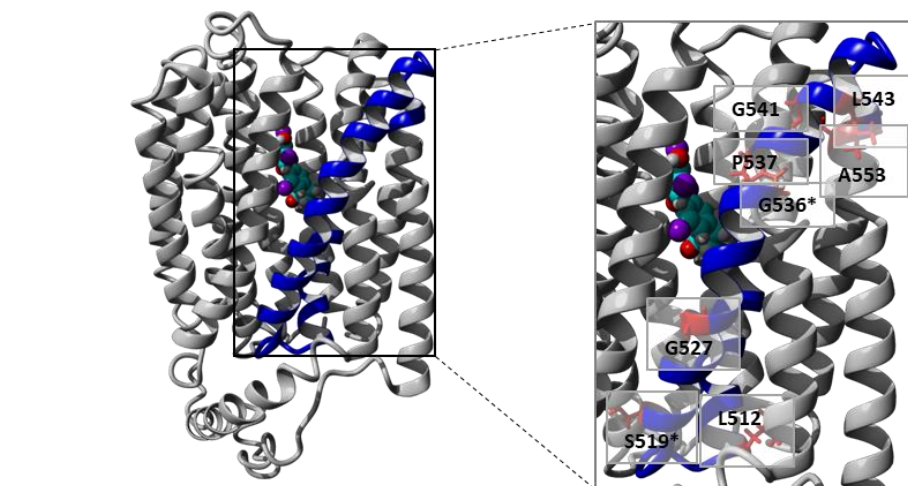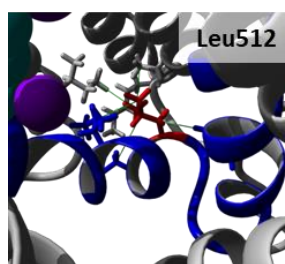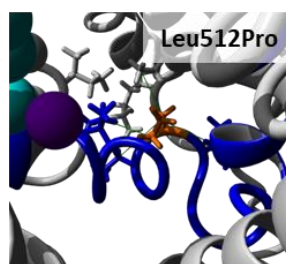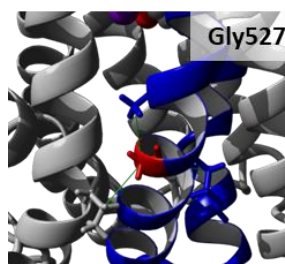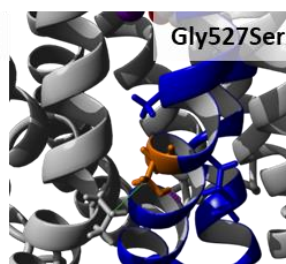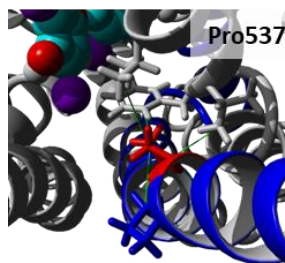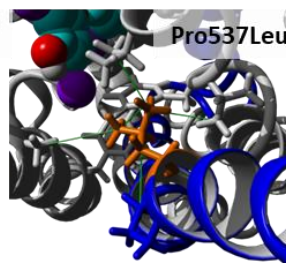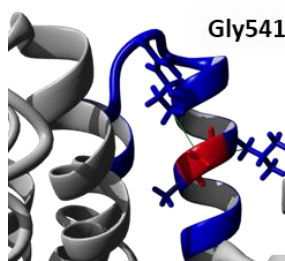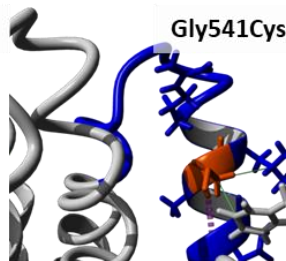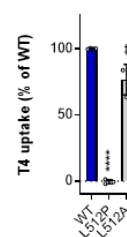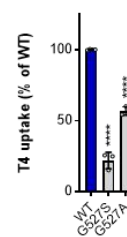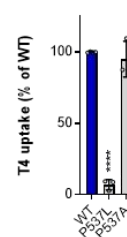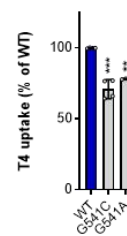



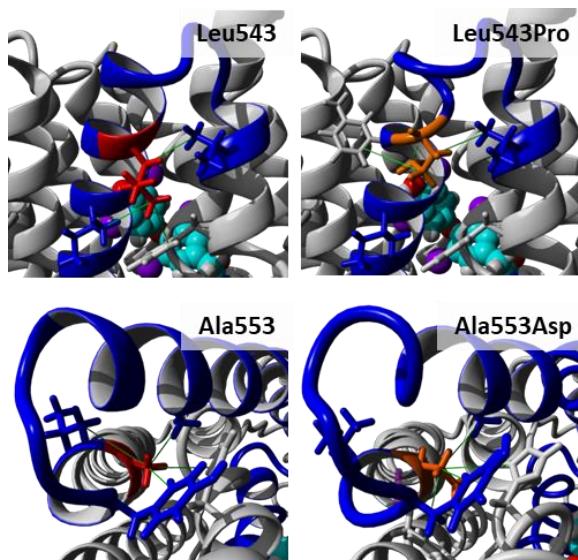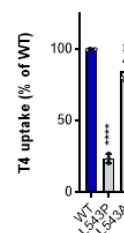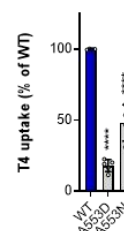

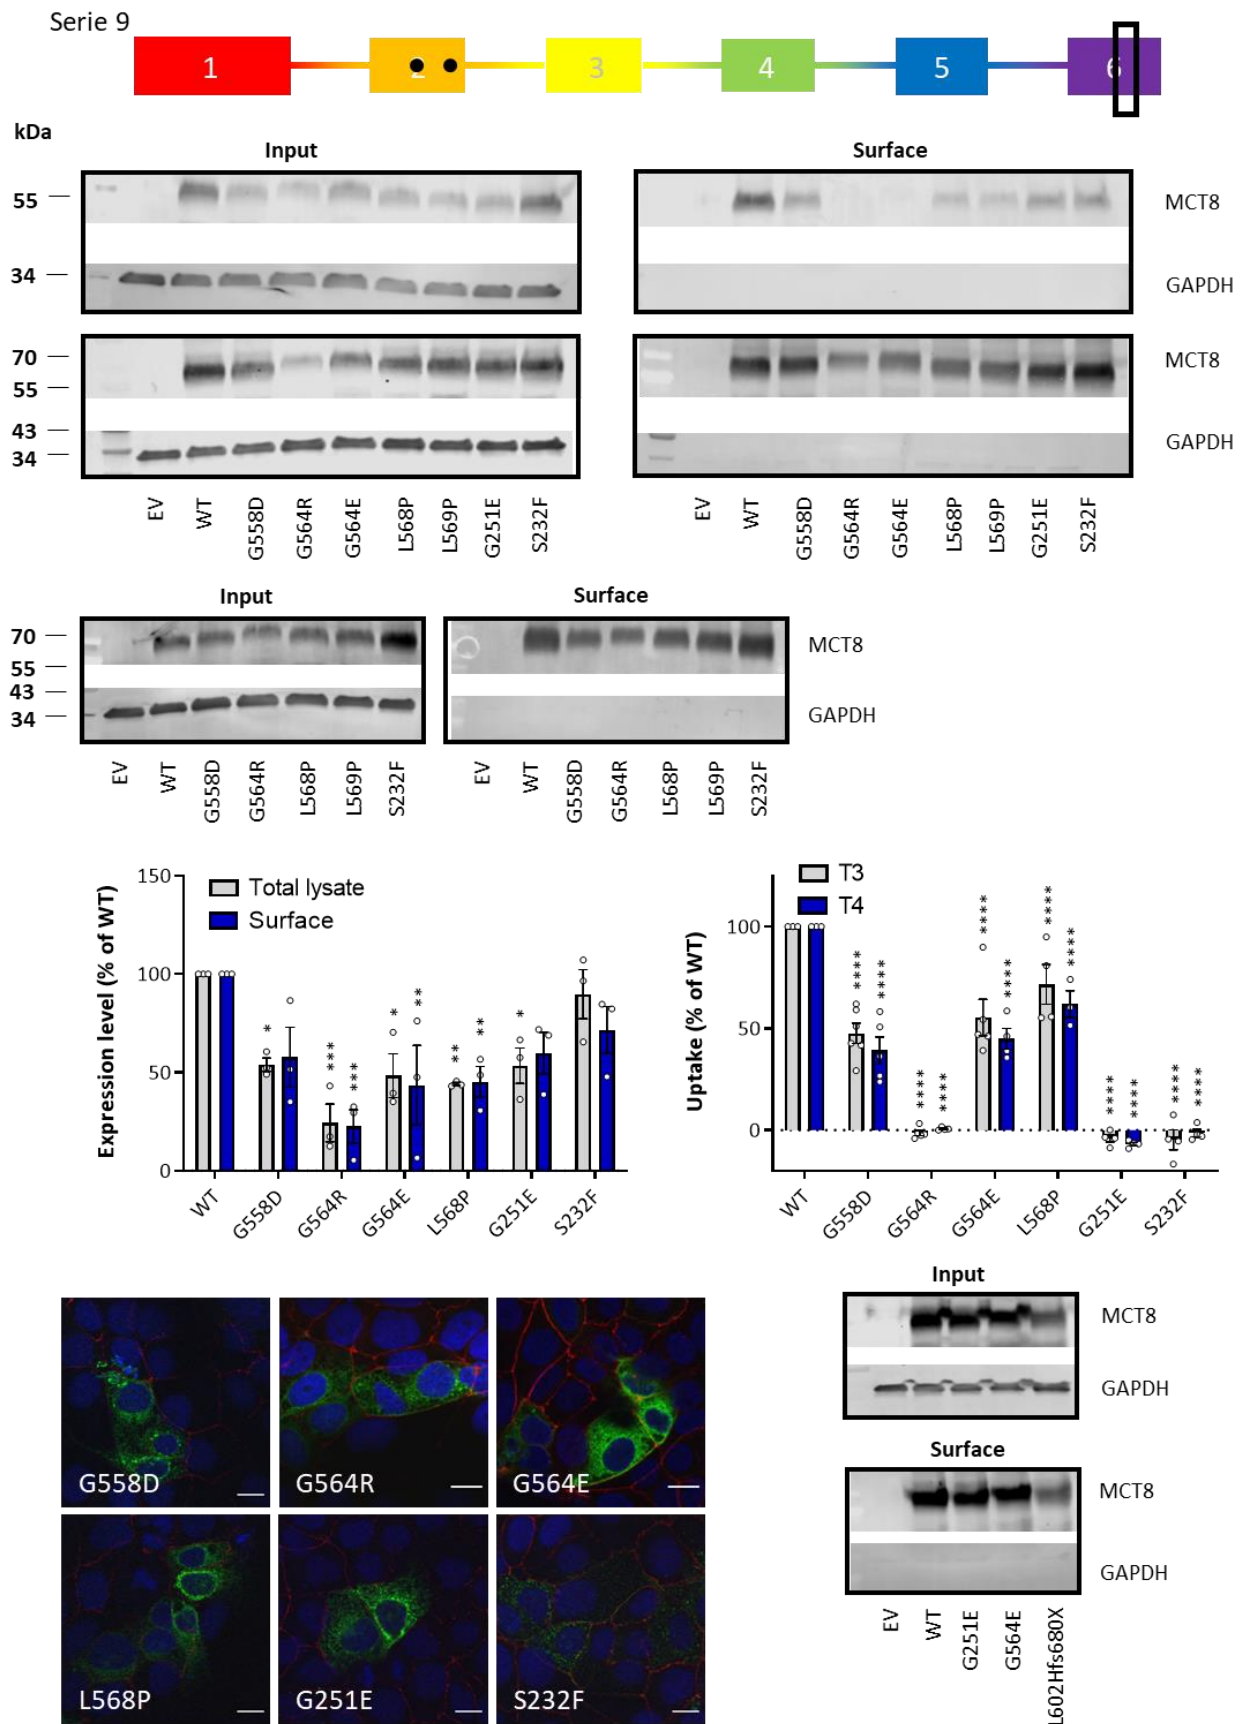

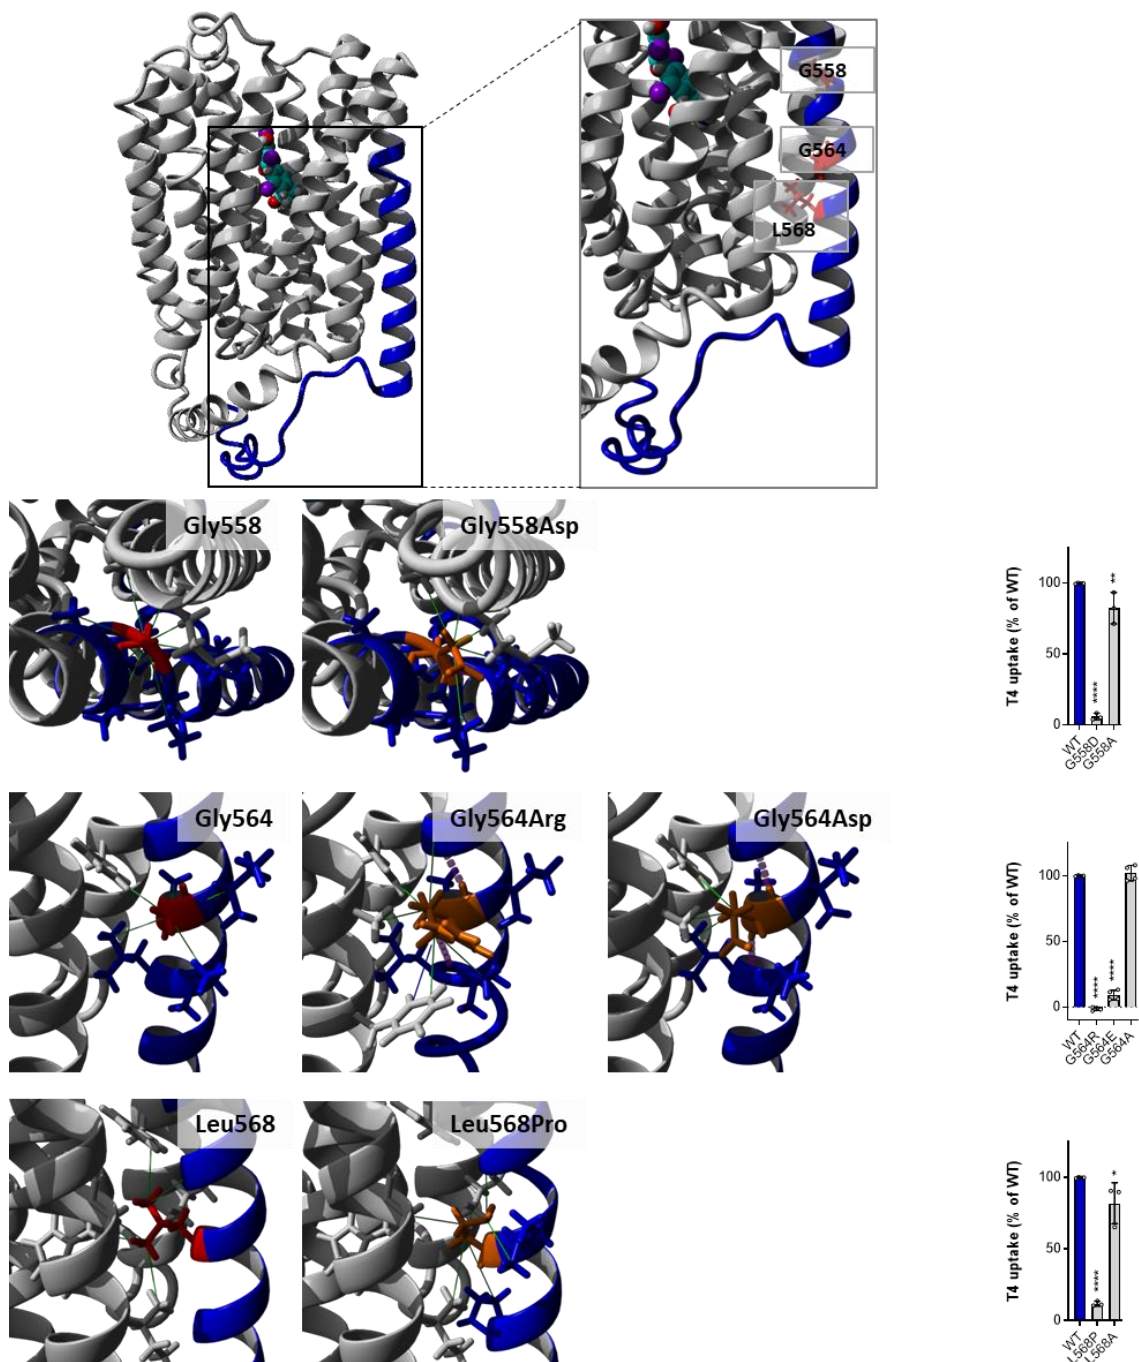

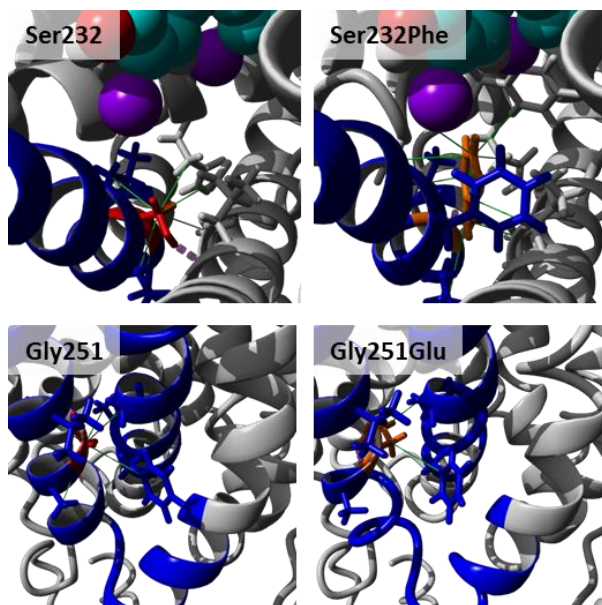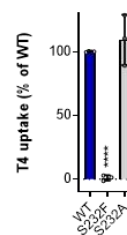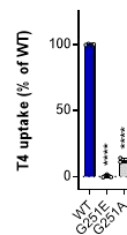

Serie 10

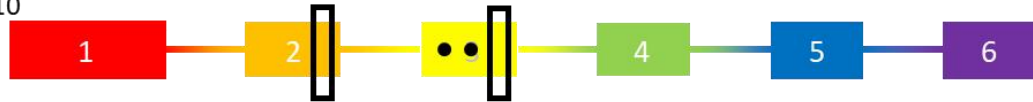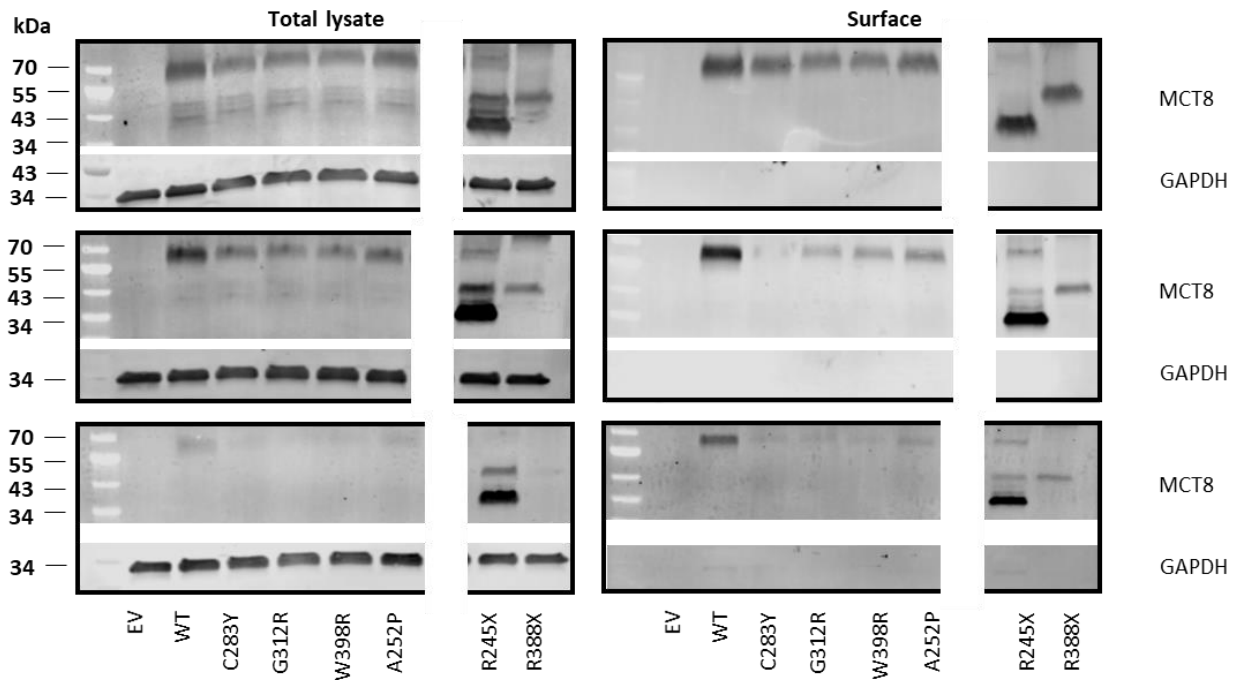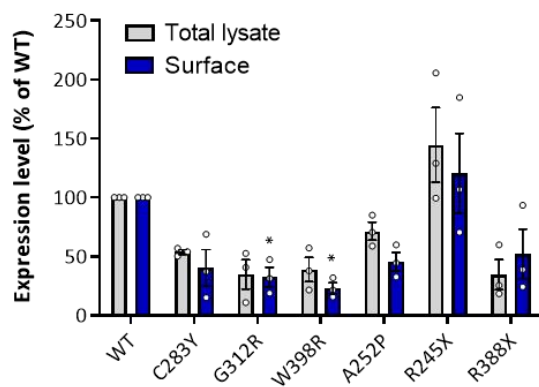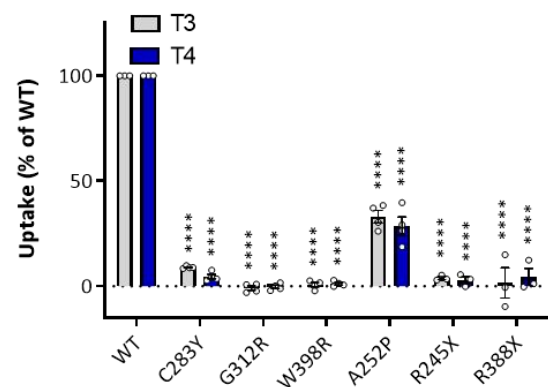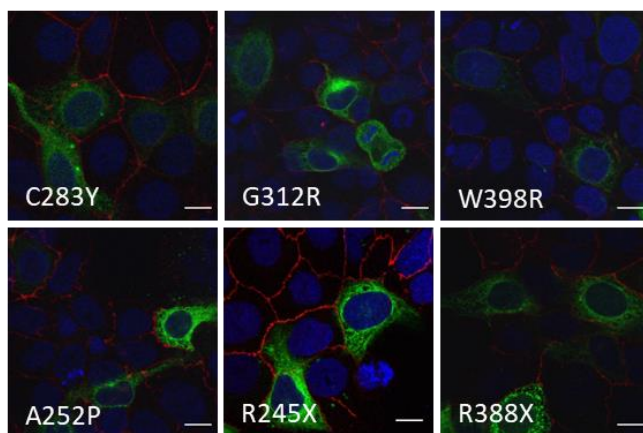



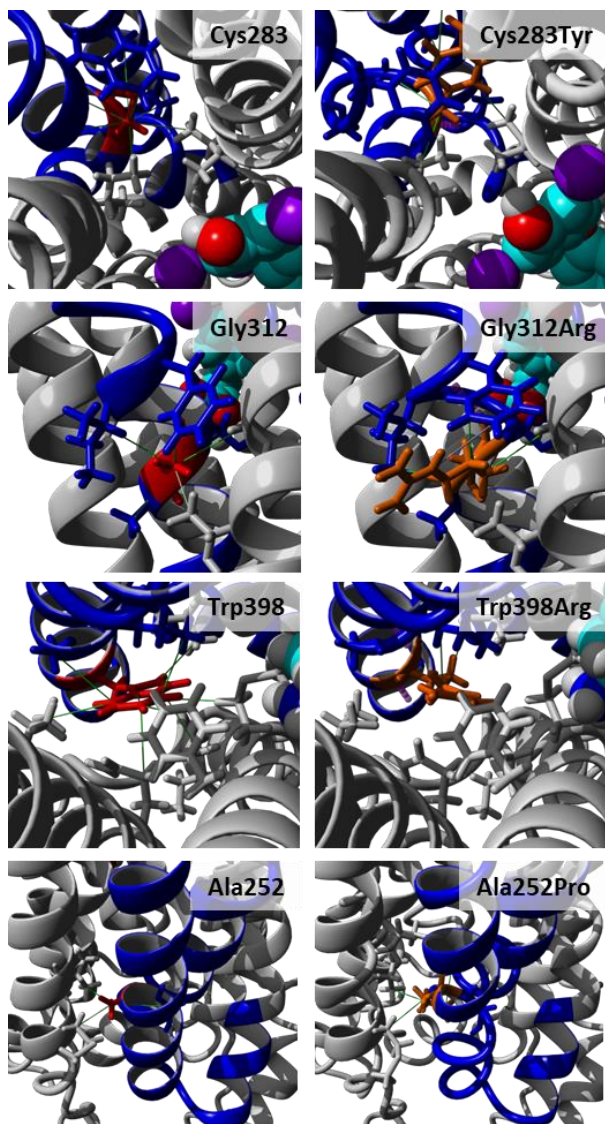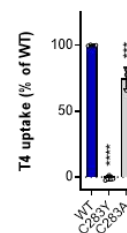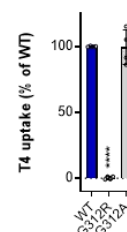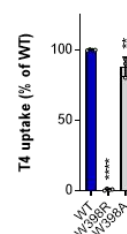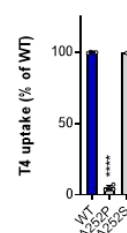

Serie 11

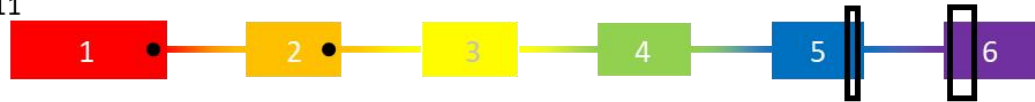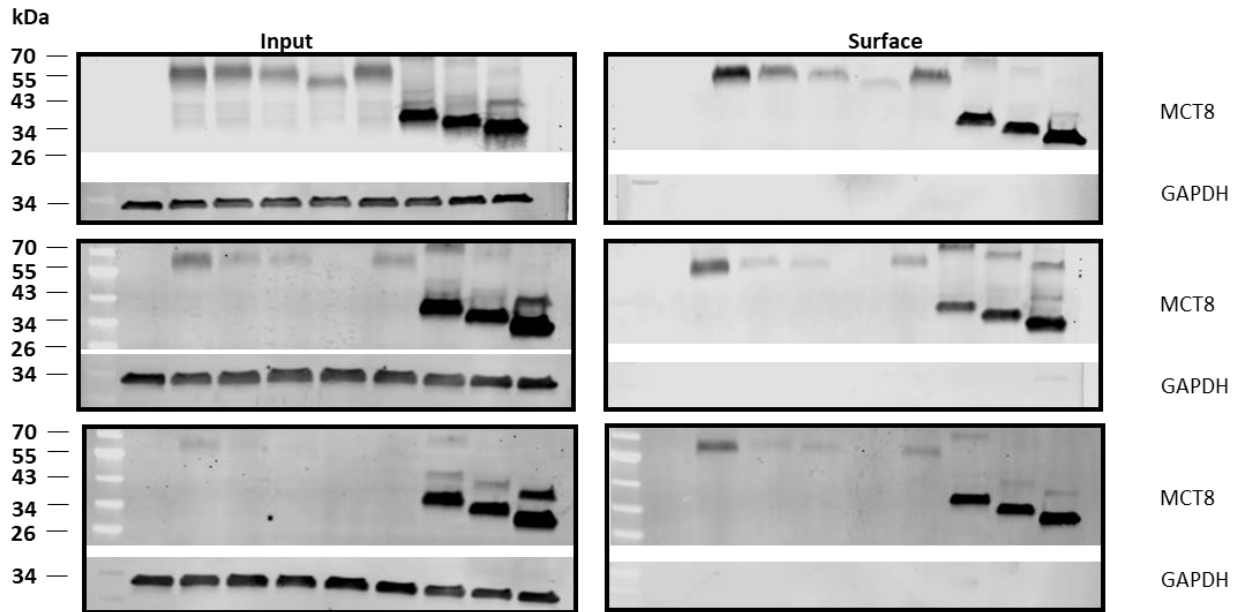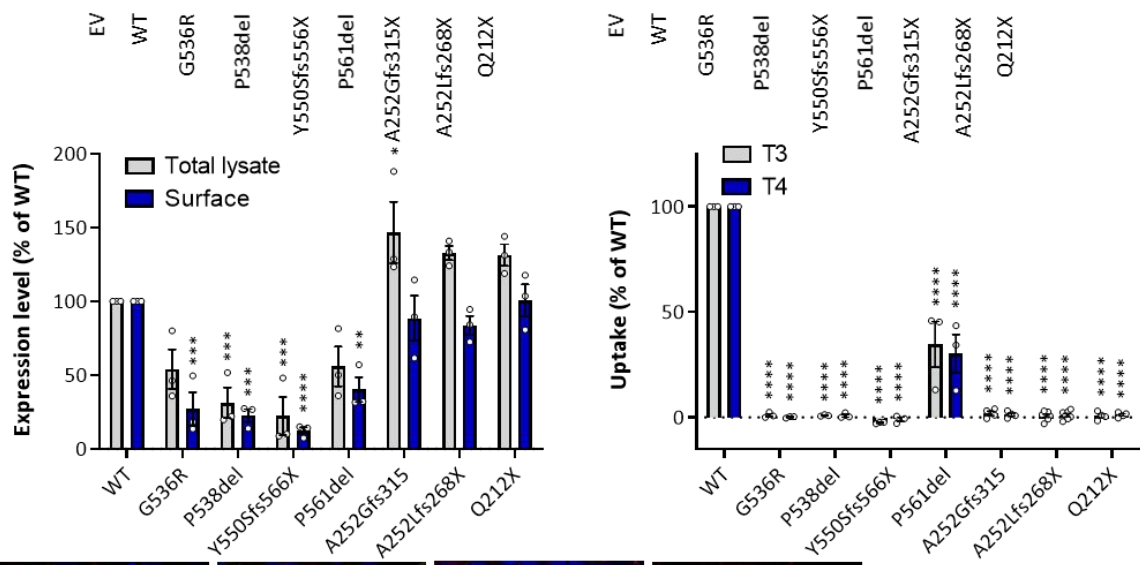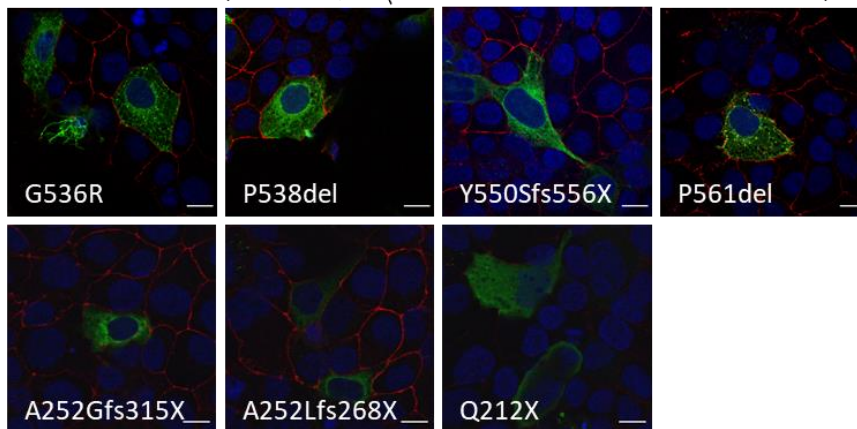

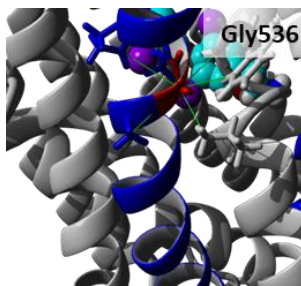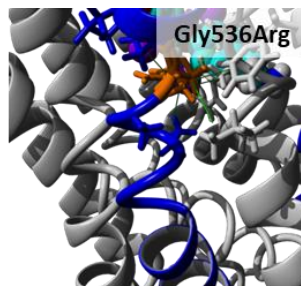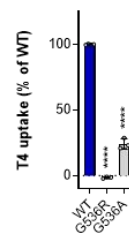



Serie 12

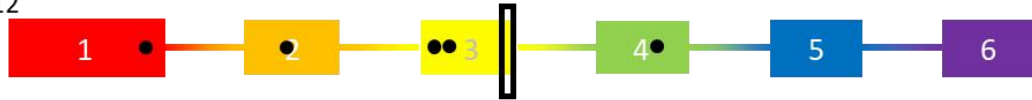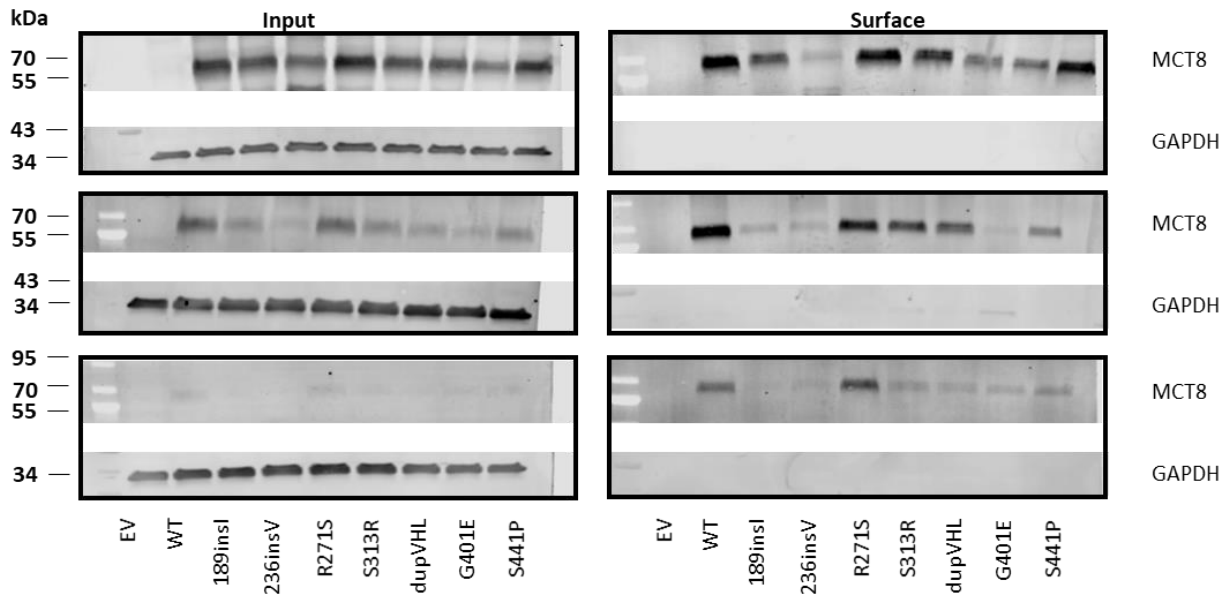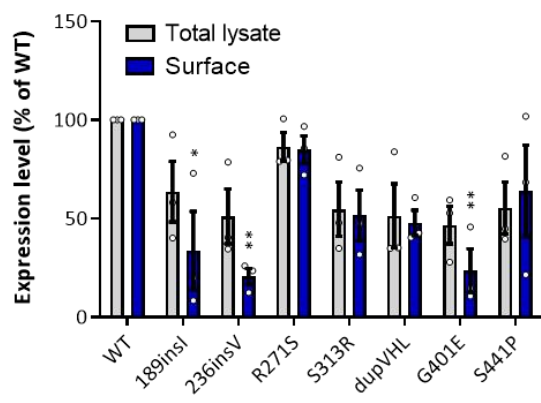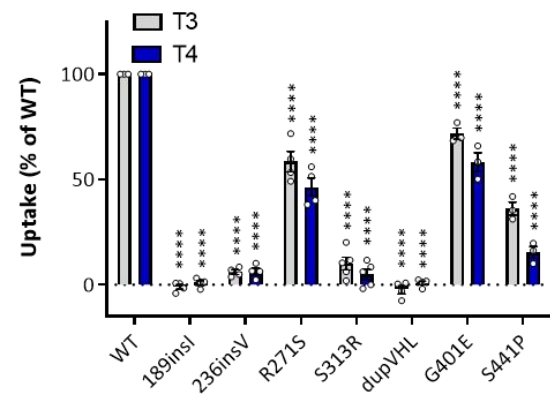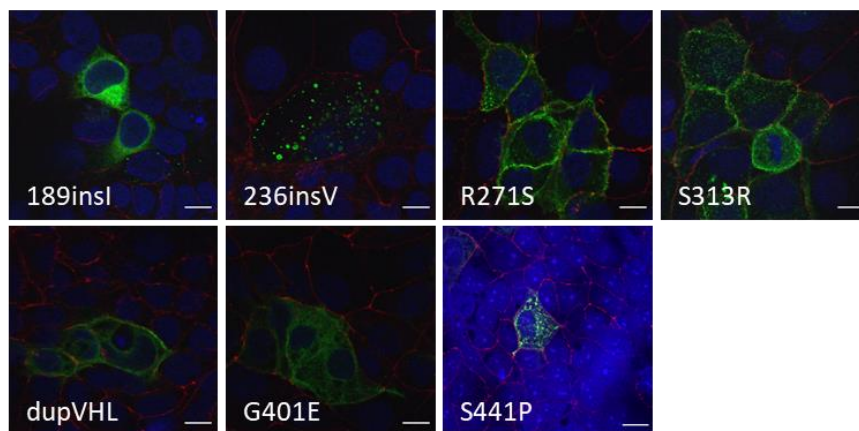

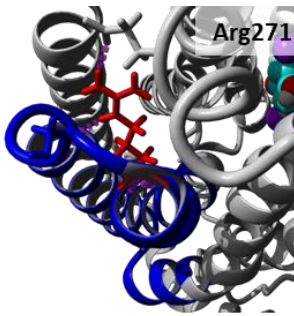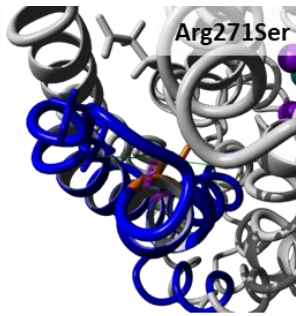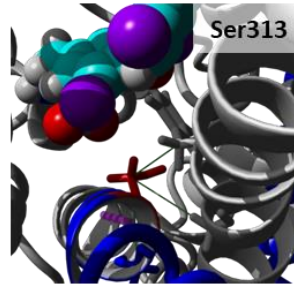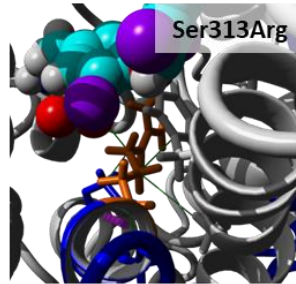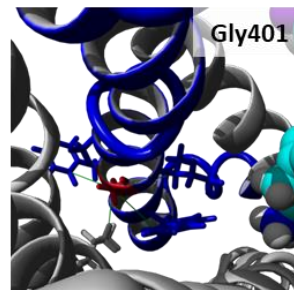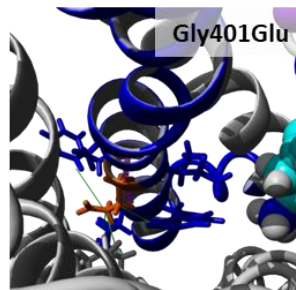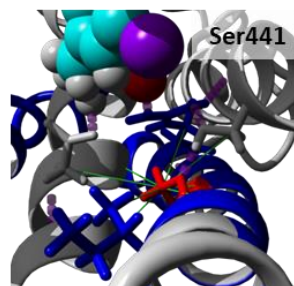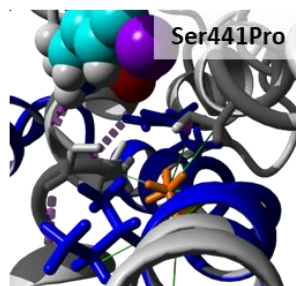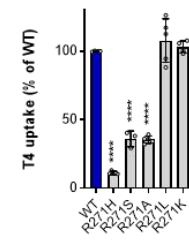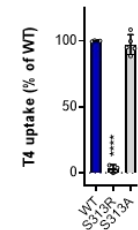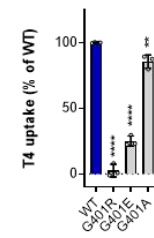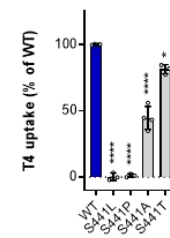

Serie 13

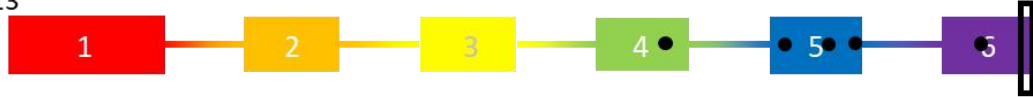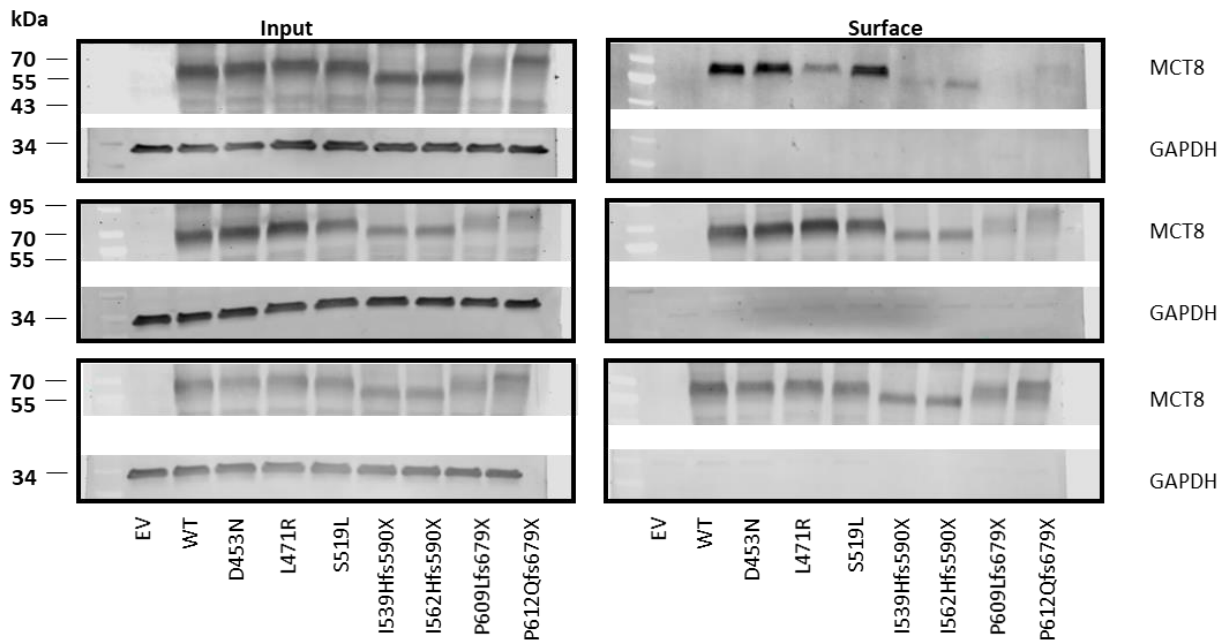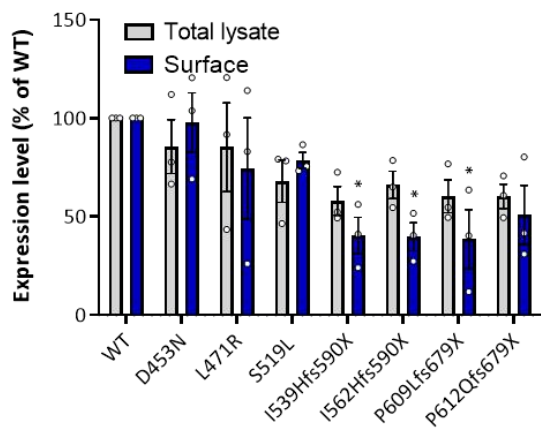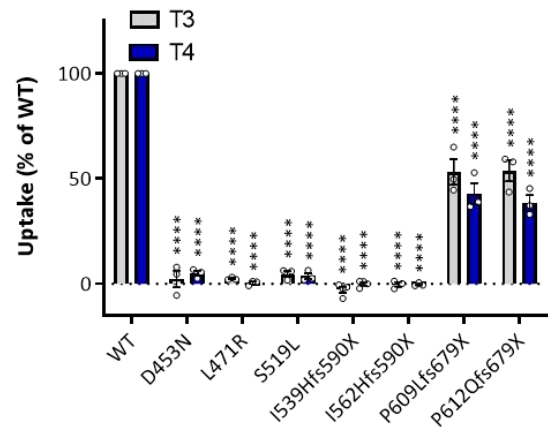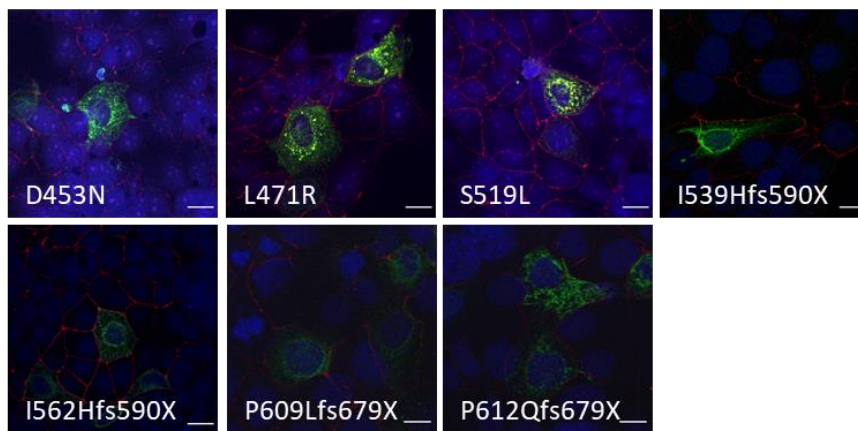

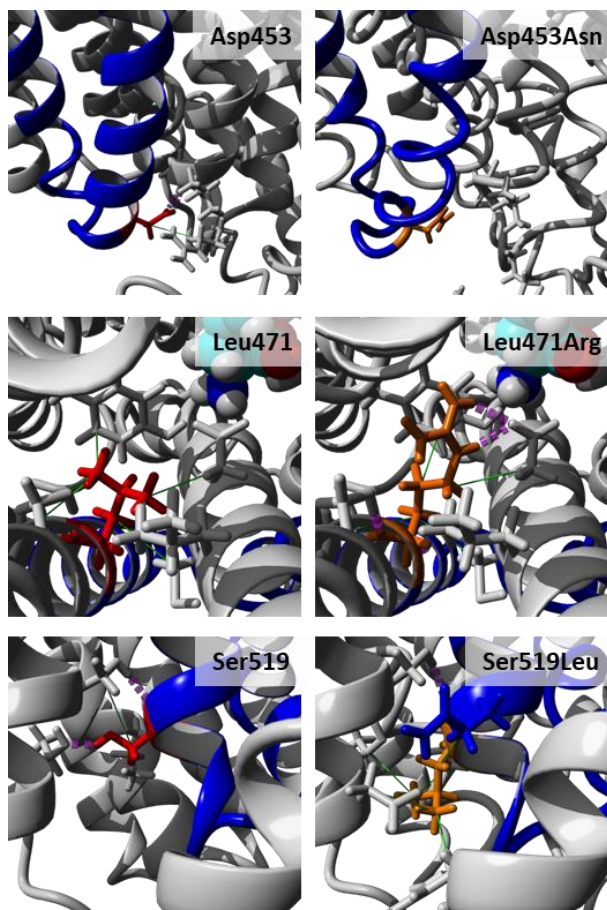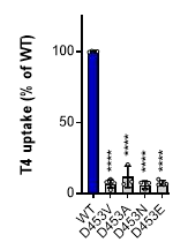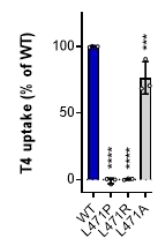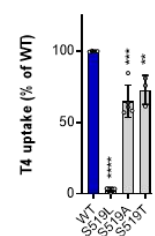



Serie 14

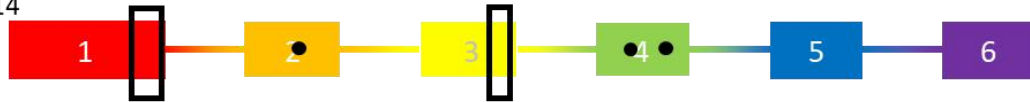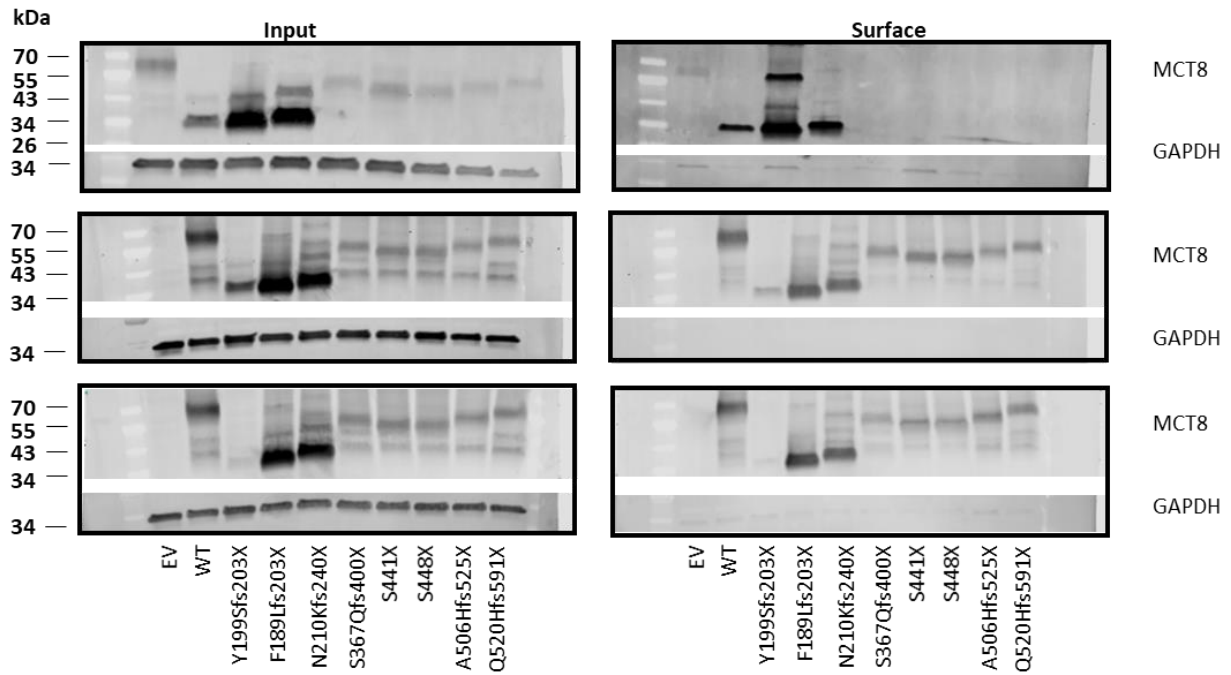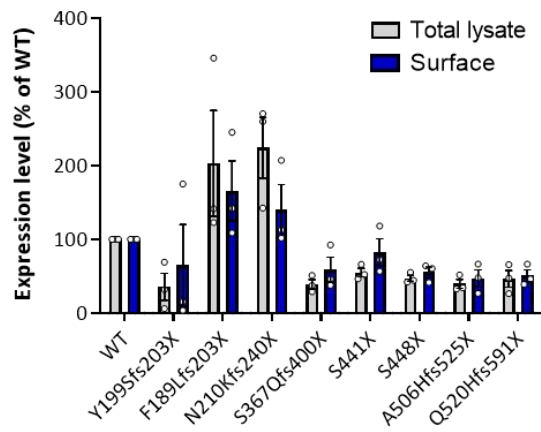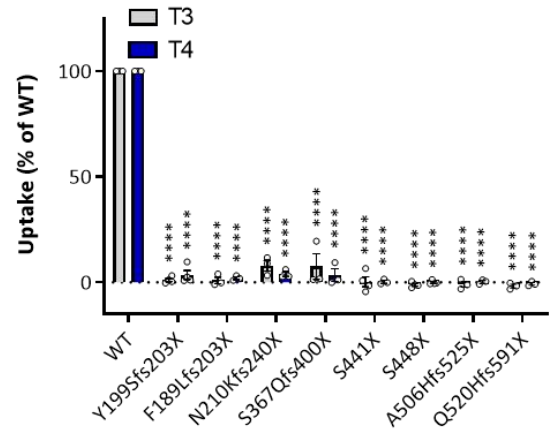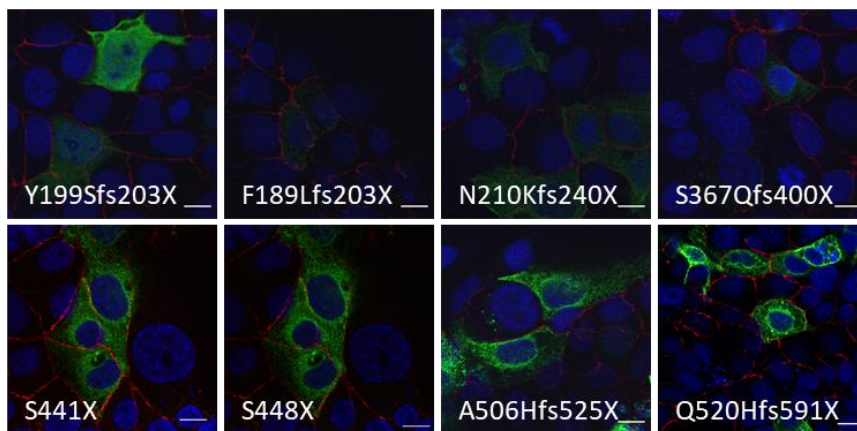

Serie 15

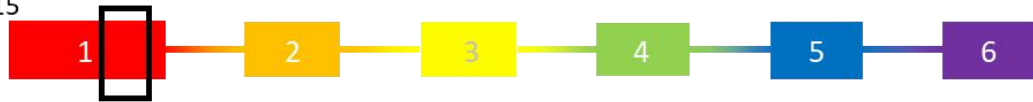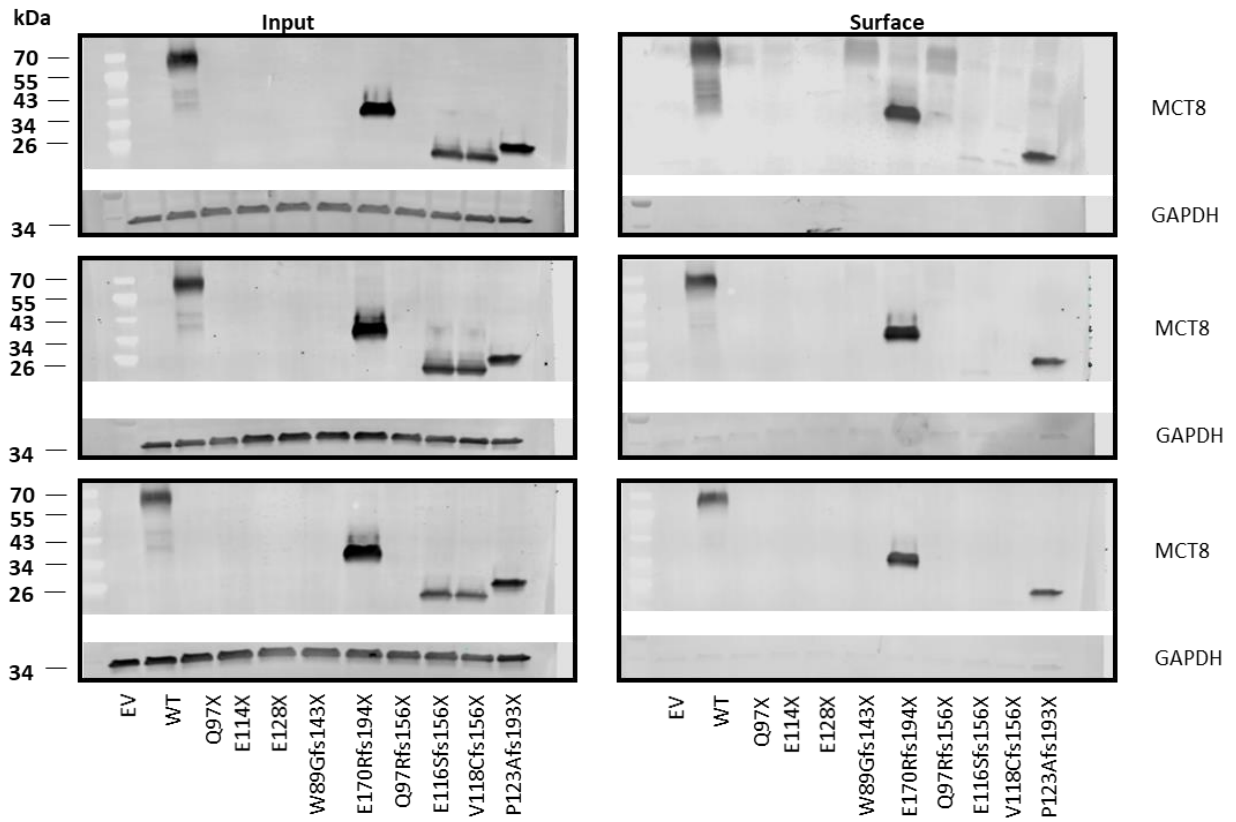

(Continues on next page)

Serie 15 (continued)

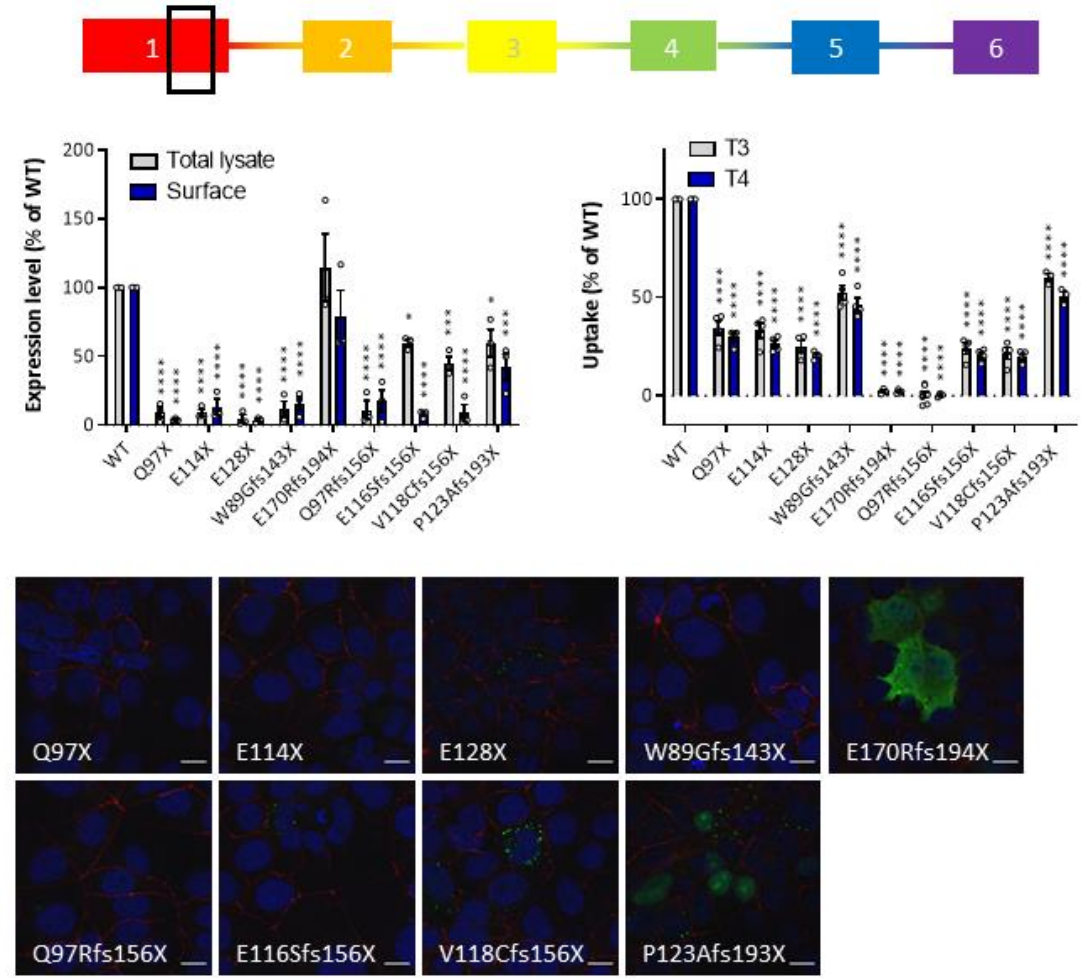

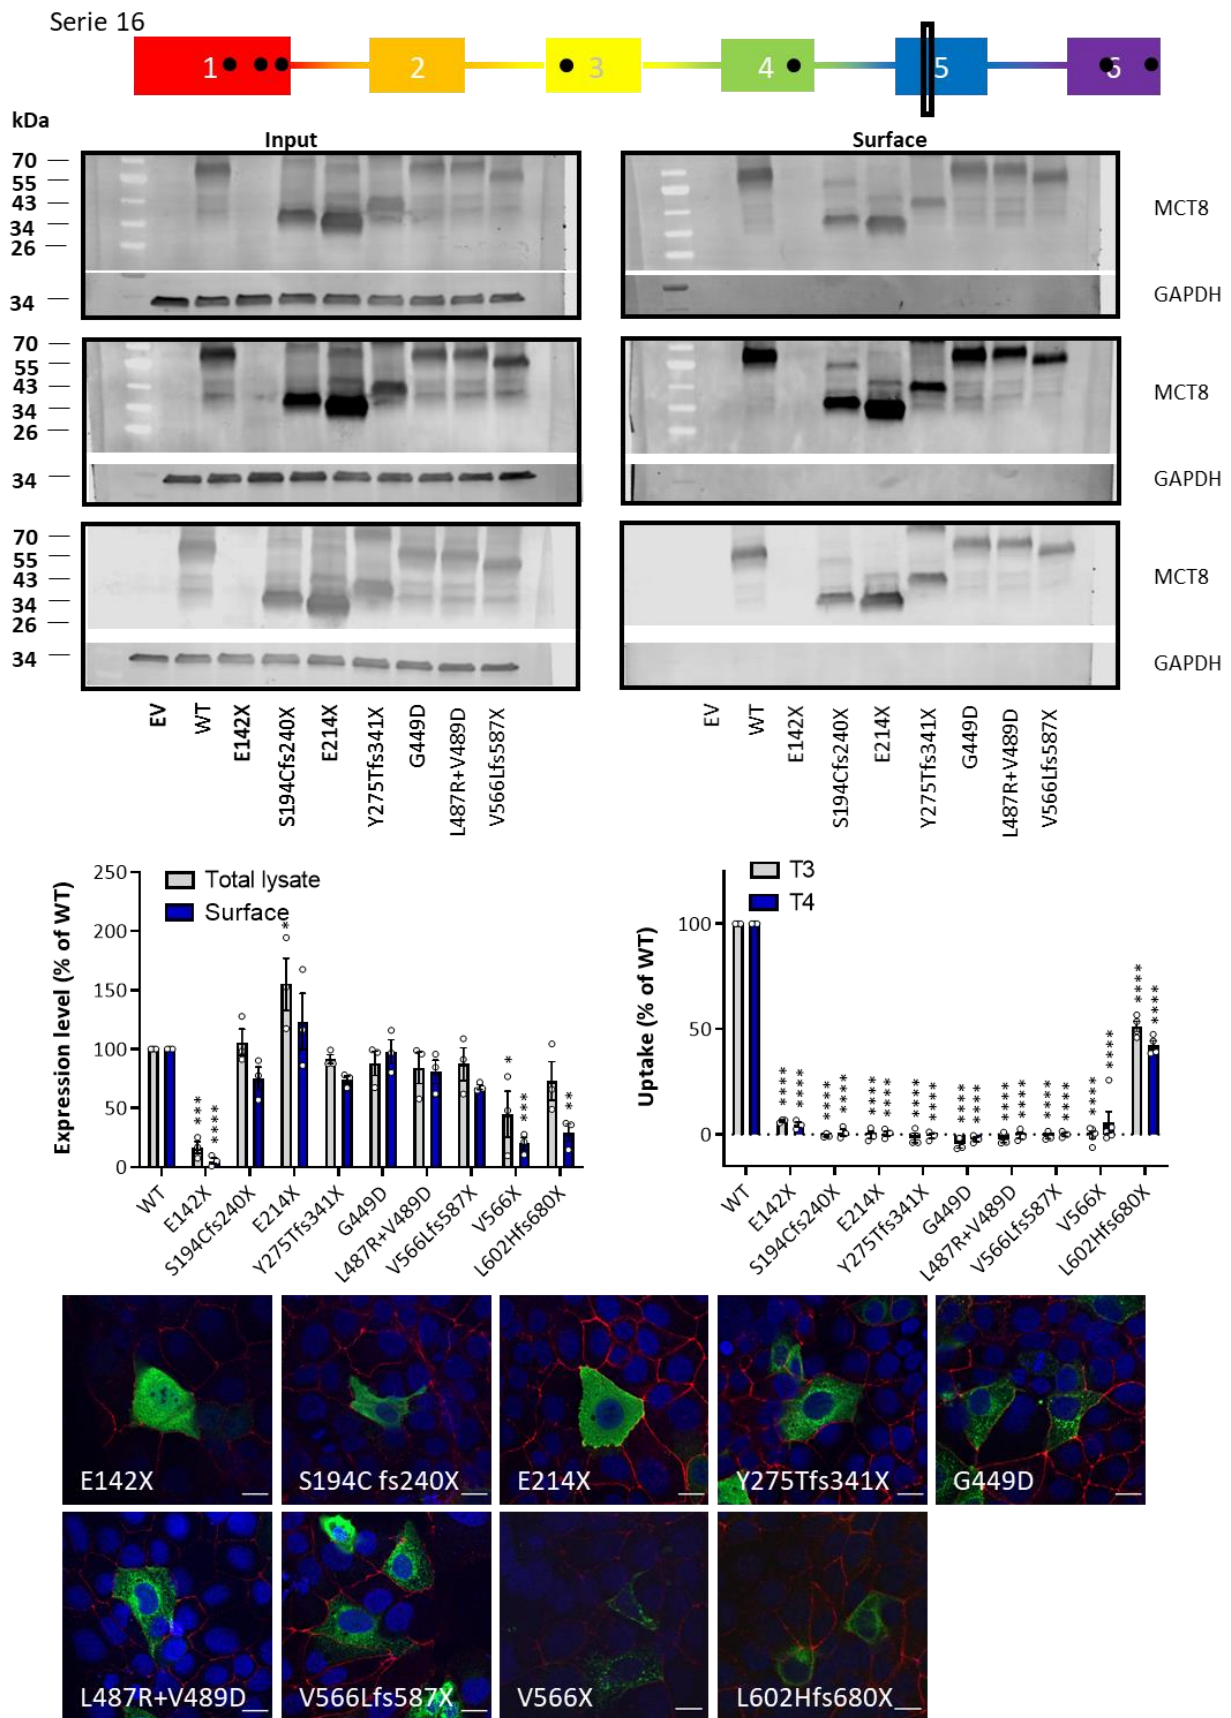



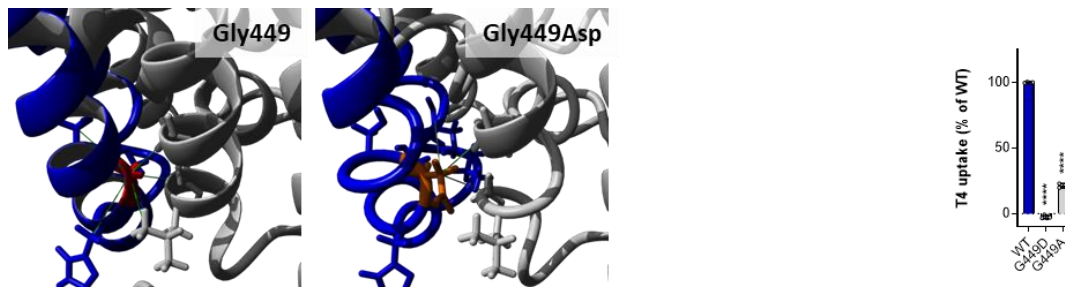

**Supplementary Fig. 5.** Overview of functional and structural evaluations of studied variants, including their exonic location, their expression in total lysates (n=3) and on the cell surface (including quantification, WT MCT8, set to 100% mean  $\pm$ s.e.m)(n=3), residual T3 and T4 transport capacity (expressed relatively to mock-transfected cells, set to 0%, and WT MCT8, set to 100%, mean  $\pm$ s.e.m.; n=3), immunocytochemistry studies(Scale bar corresponds to 15  $\mu$ M), structural predictions and residual transport capacity of individual missense variants, their alanine substituents and related variants. Surface expression of V566X and L602HfsX680 (including original Western blots) was previously reported <sup>12</sup>. For series 1-8, the close-up panel that displays the location of the affected residues in the predictive MCT8 protein structure also highlights affected residues for which experimental data is provided in later series (9-16); such residues are indicated with an \* in the close-up panels. Dashed lines in some graphs of uptake represent 0% uptake. Uptake function and (cell surface) expression levels of indicated variants were compared to WT MCT8 levels, using One-way ANOVA with Dunnett's post-hoc tests. Significance: \*  $p<0.05$ , \*\* $p<0.005$ , \*\*\* $p<0.0005$ , \*\*\*\* $p<0.0001$ . Exact P values are provided in Supplementary Data 1. Source data are provided as a Source Data file.

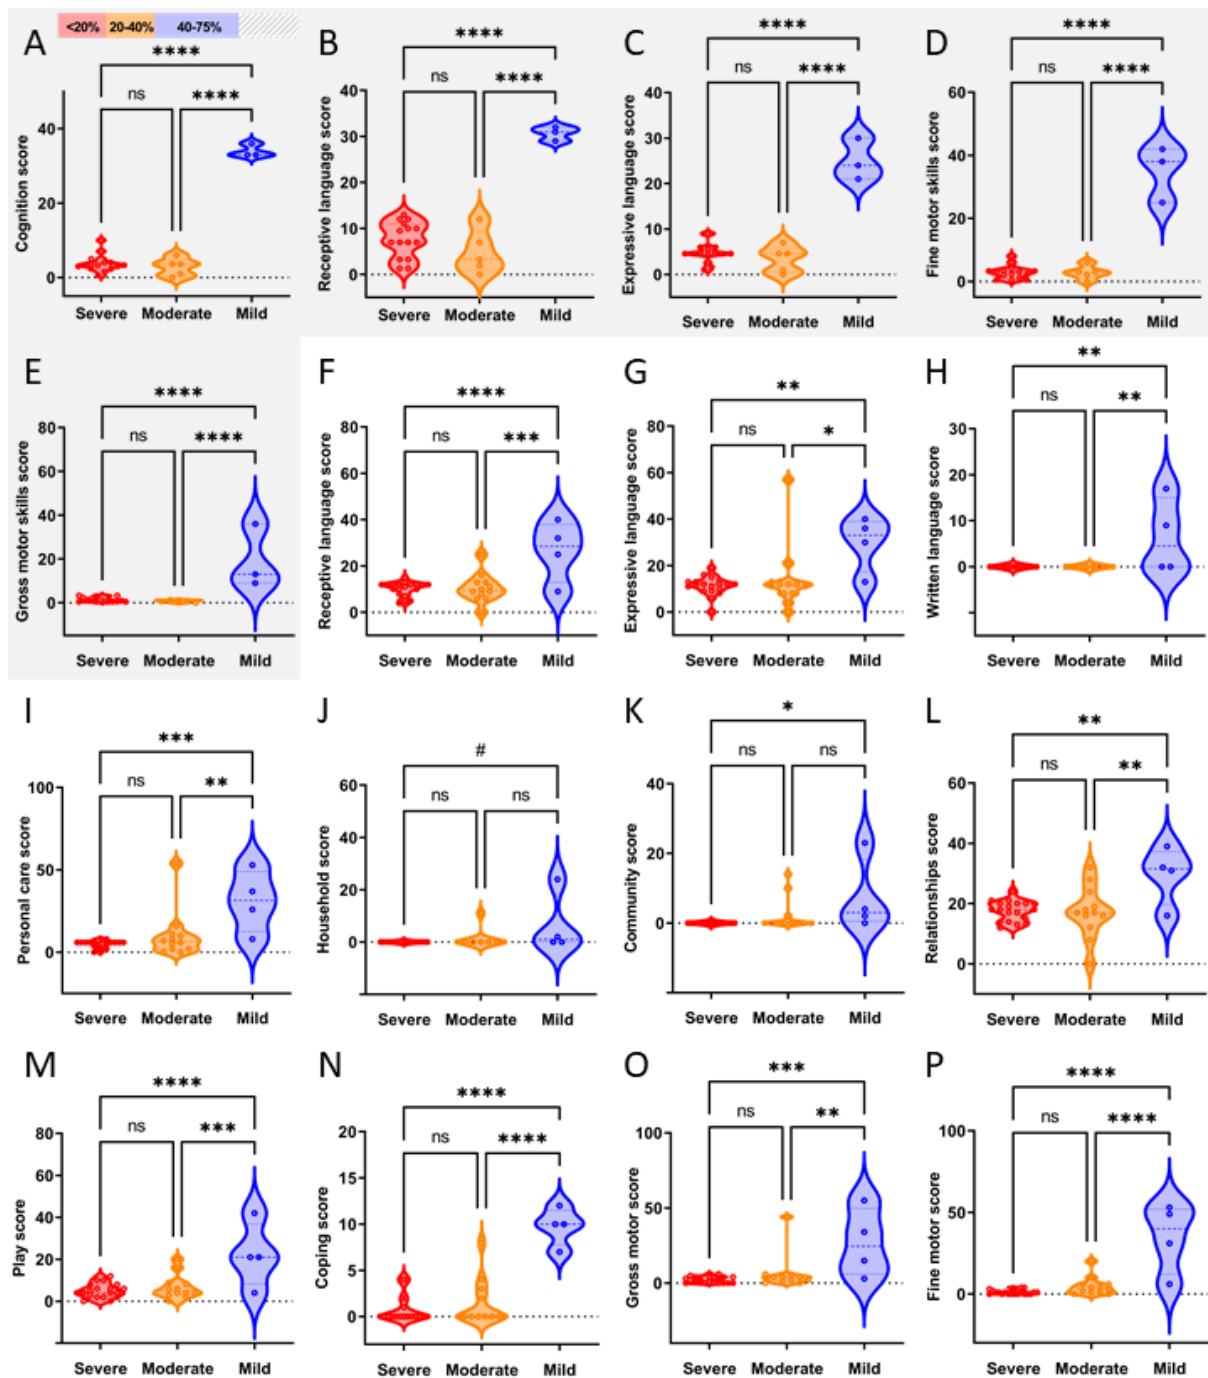

**Supplementary Fig. 6.** Developmental outcomes in MCT8 deficiency linked to mutant T3 transport capacity in COS-1 cells. Patients with MCT8 deficiency are stratified across different LoF classes of functional impact. Scores for sub-domains of the Bayley Scales of Infant Development (BSID) III (grey): (A) cognition, (B) receptive language, (C) expressive language, (D) fine motor skills and (E) gross motor skills and the Vineland Adaptive Behavior Scales: (F) receptive language, (G) expressive language, (H) written language, (I) personal care, (J) household, (K) community, (L) relationships, (M) play, (N) coping,

(O) gross motor and (P) fine motor. Patients younger than 2 years were excluded from analyses of all BSID-III subscales (A-E). Patients younger than 4 years were excluded from analyses of the VABS-II Written language (H) and Household (J) subscales and patients younger than 1 year were excluded from analyses of the VABS-II Community (K) subscale. Dashed lines represent 0% score. Differences across groups were tested using One-way ANOVA with Tukey's post-hoc tests. # indicates borderline significance ( $p < 0.1$ ), \*  $p < 0.05$ , \*\*  $p < 0.005$ , \*\*\*  $p < 0.0005$ , \*\*\*\*  $p < 0.0001$ . Exact P values are provided in Supplementary Data 1. Source data are provided as a Source Data file.

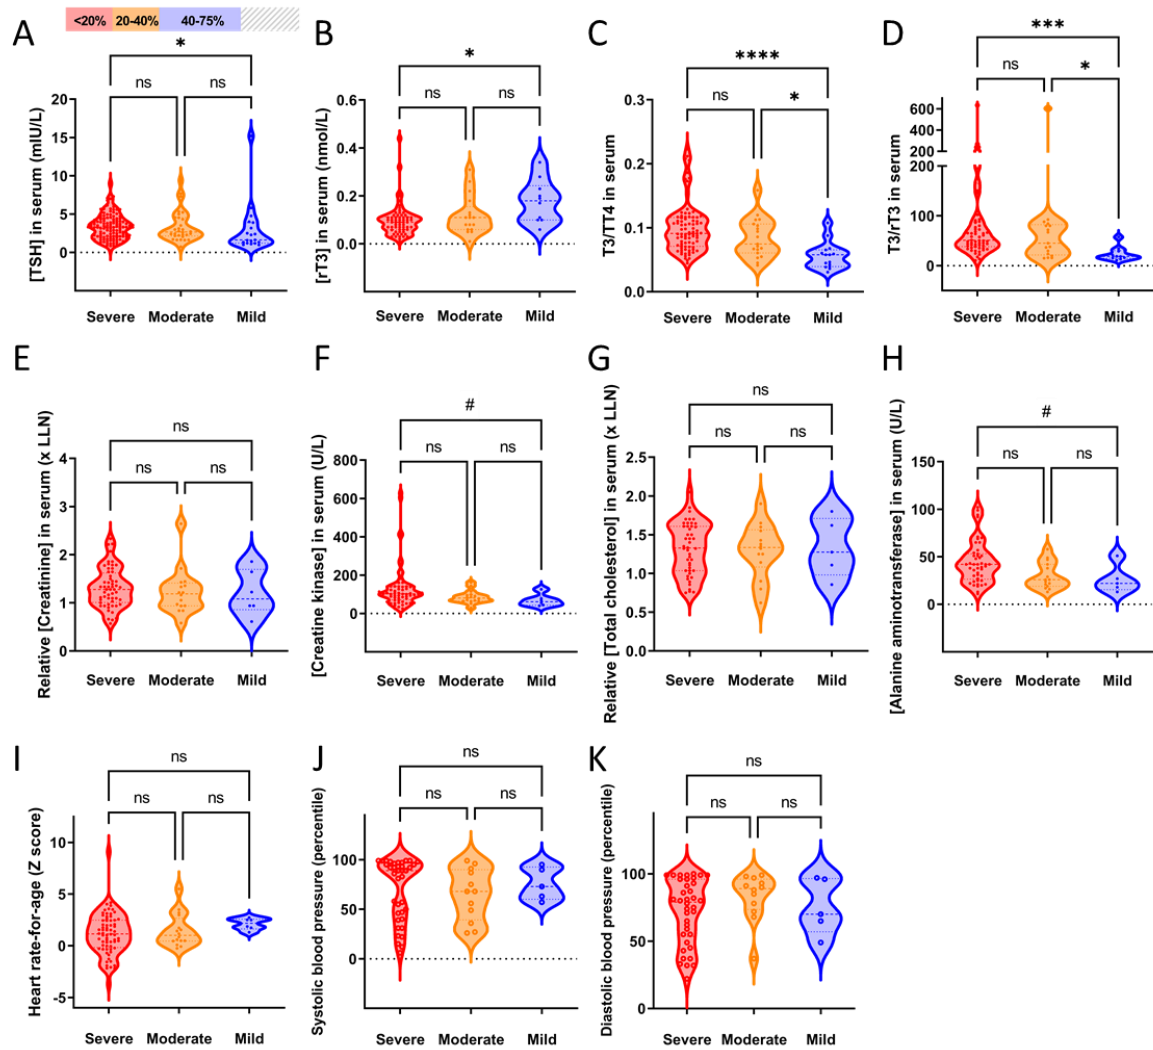

**Supplementary Fig. 7.** Metabolic outcomes in MCT8 deficiency linked to mutant T3 transport capacity in COS-1 cells. Patients with MCT8 deficiency are stratified across different LoF classes of functional impact. (A) Serum TSH concentration; (B) Serum rT3 concentration; (C) Serum T3:TT4 ratio; (D) Serum T3/rT3 ratio; (E) Serum creatinine concentration relative to the lower limit of normal; (F) Serum creatinine kinase concentrations; (G) Serum total cholesterol relative to the lower limit of normal; (H) Serum Alanine aminotransferase concentration; (I) Heart rate-for-age; (J) Systolic blood pressure percentile; (K) Diastolic blood pressure percentile. Dashed lines represent 0% score. Differences across groups were tested using One-way ANOVA with Tukey's post-hoc tests or Kruskal-Wallis with Dunn's multiple comparisons test. # indicates borderline significance ( $p<0.1$ ), \*  $p<0.05$ , \*\* $p<0.005$ , \*\*\* $p<0.001$ , \*\*\*\* $p<0.0001$ .

\*\*\* $p < 0.0005$ , \*\*\*\* $p < 0.0001$ . Exact P values are provided in Supplementary Data 1. Source data are provided as a Source Data file.

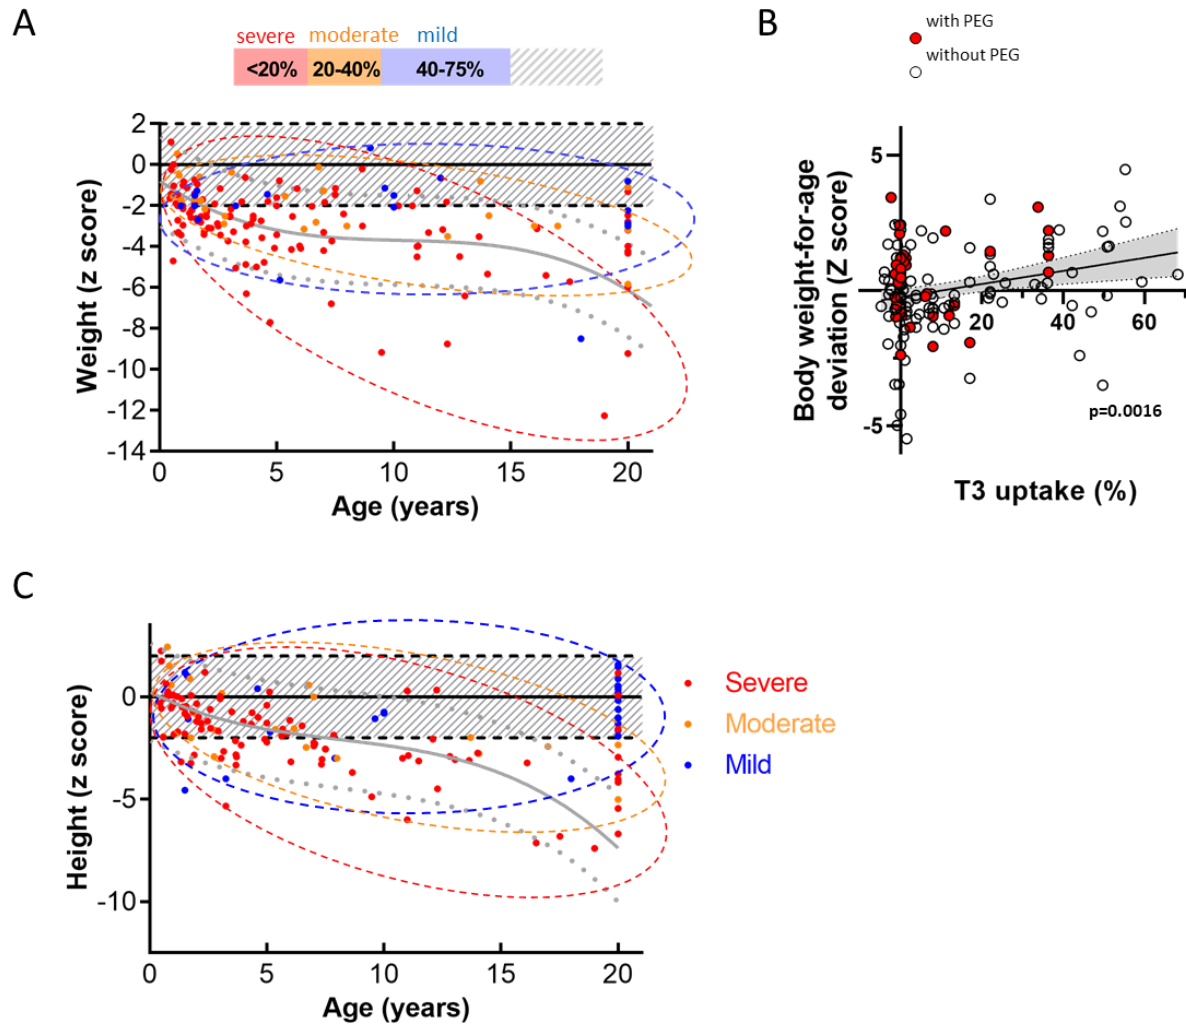

**Supplementary Fig. 8.** (A) Body weight-for-age with dots representing individual body weight measurements. (B) Deviation of bodyweight-for-age z-score from the expected bodyweight-for-age z-score as calculated based on available natural history data (1), with dots representing individual bodyweight measurements (red: patients with PEG-tube, white: patients without PEG-tube). (C) Body height-for-age with dots representing individual body height measurements. For A and C, non-linear (third order) polynomial regression was used to plot the trend (grey solid line) with its 95% error band (grey dashed lines); normal range indicated by shaded area. Patients aged >20 years were plotted at 20 years. Dashed ovals include >90% of data points for each functional LoF class, based on T3 uptake function in COS-1 cells. Source data are provided as a Source Data file. Exact P values are provided in Supplementary Data 1.

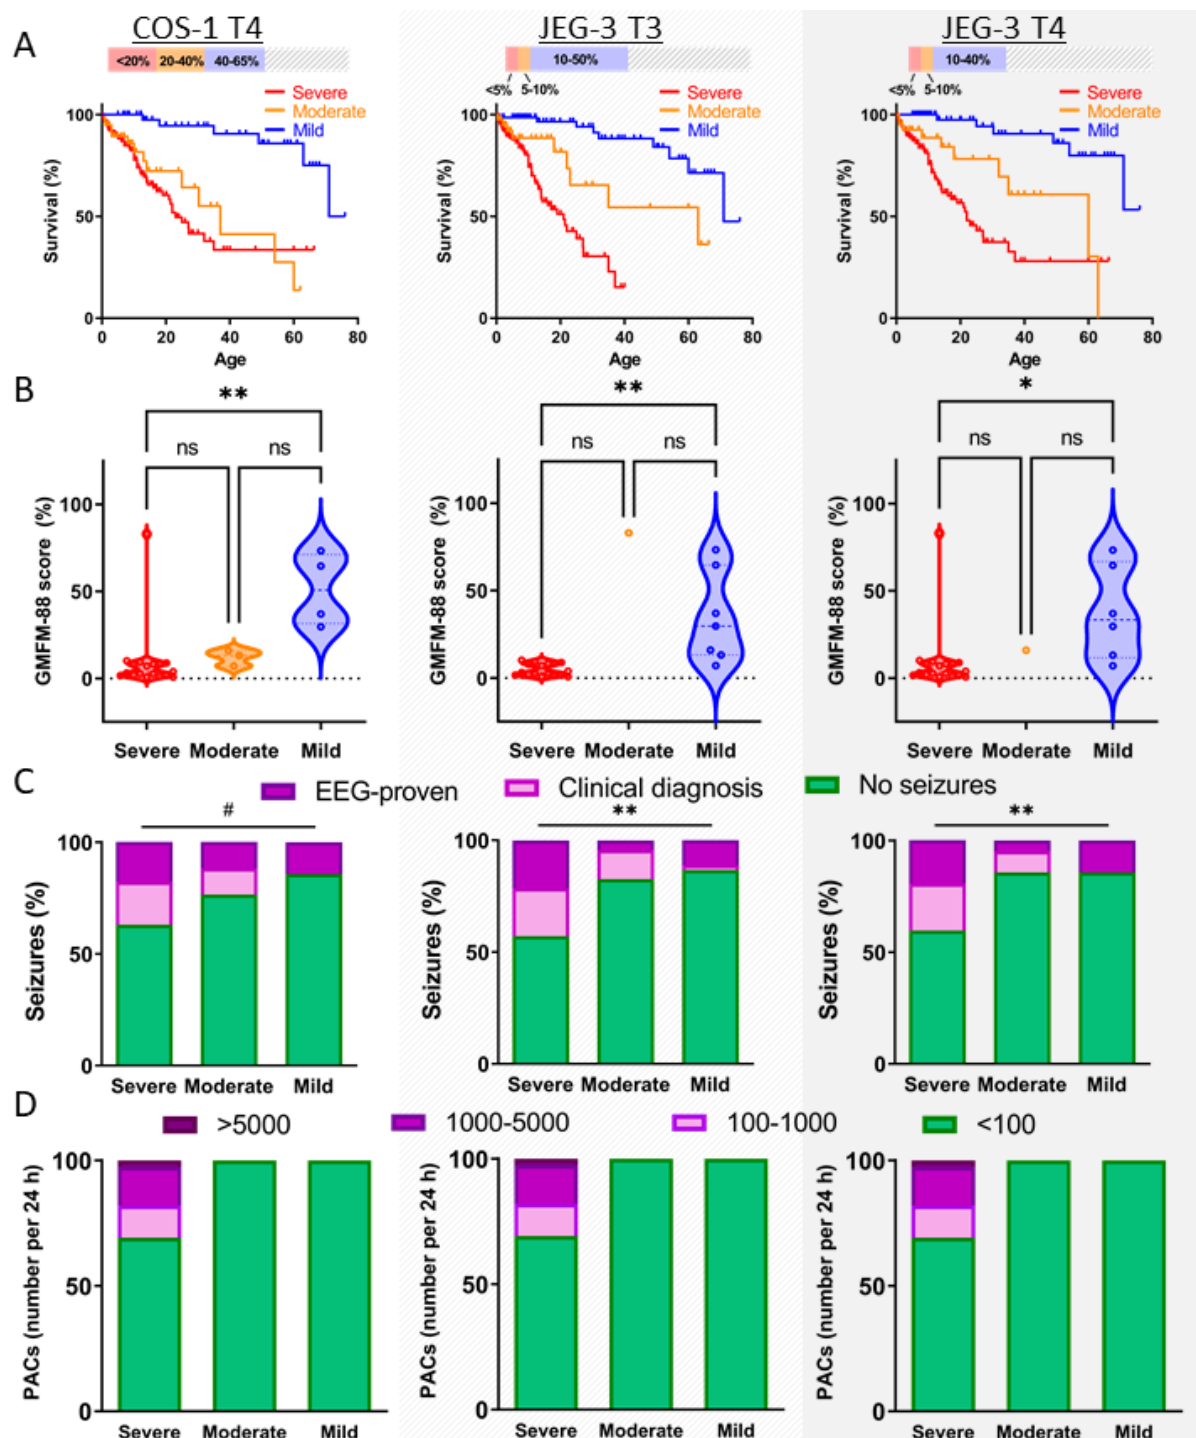

**Supplementary Fig. 9.** Phenotypic outcomes in MCT8 deficiency linked to mutant T3 transport capacity in different cell lines and different substrates. Patients with MCT8 deficiency are stratified across different LoF classes of functional impact. The left panel indicates T4 uptake in COS-1 cells; the middle panel indicates T3 uptake in JEG-3 cells; the right panel indicates T4 uptake in JEG-3 cells. (A) Survival; (B) GMFM-88; (C) Seizures; (D) PACs. Dashed line in (B) represents 0% score. # indicates borderline significance ( $p < 0.1$ ), \*  $p < 0.05$ , \*\* $p < 0.005$  with Kruskal-Wallis test with Dunn's multiple comparisons

test. Source data are provided as a Source Data file. Exact P values are provided in Supplementary Data

1.

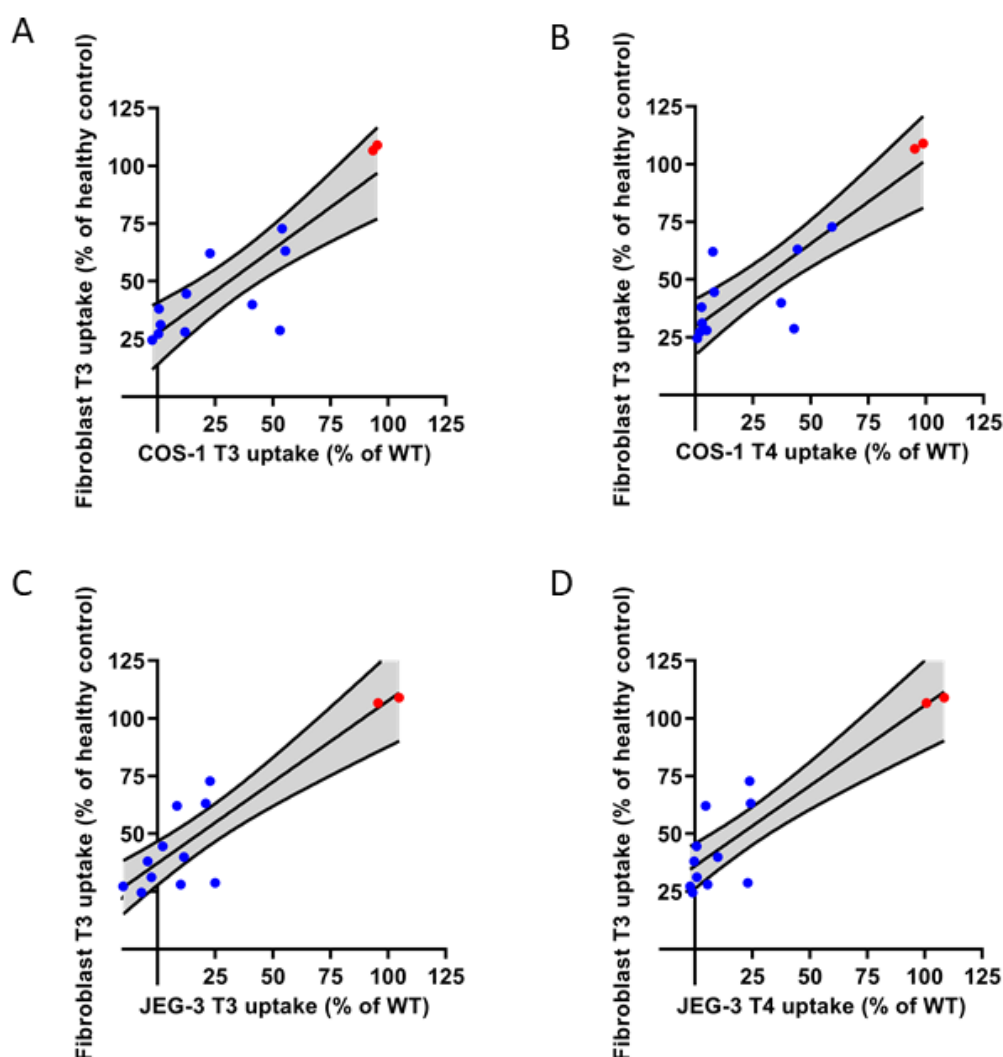

**Supplementary Fig. 10.** Correlation plot of accumulation of T3 (A) and T4 (B) in COS-1 cells and T3 (C) and T4 (D) in JEG-3 cells with accumulation of T3 in patient-derived fibroblasts. Blue dots represent uptake values of pathogenic variants associated with a clinical phenotype typical of MCT8 deficiency, that segregated within families as an X-linked disorder. Red dots represent values of known benign variants in MCT8, judged on the absence of a clinical phenotype, or incompatible mode of segregation. The lines represent the mean with the 95% confidence intervals. Source data are provided as a Source Data file.



A

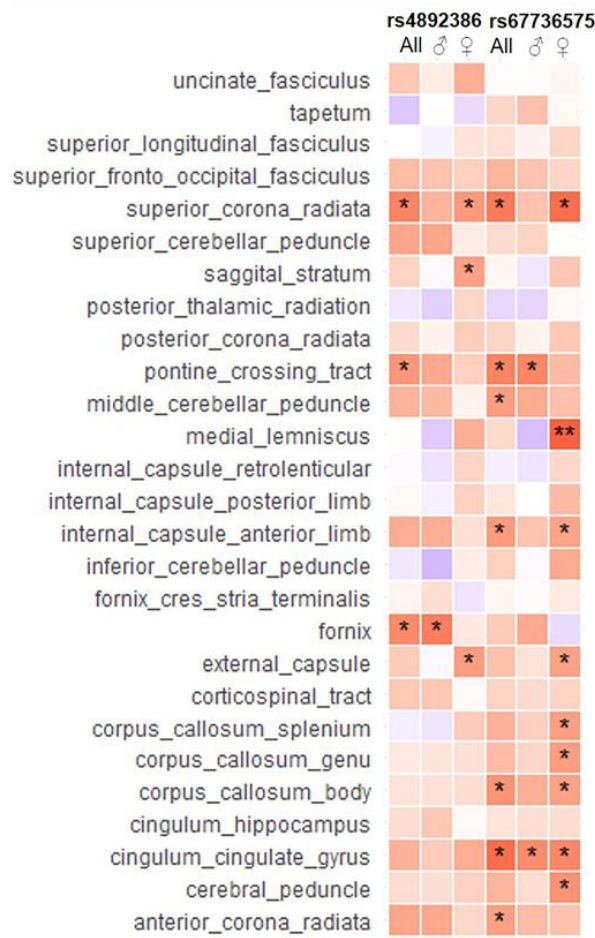

Z-value

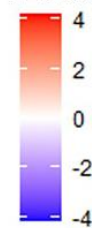

B

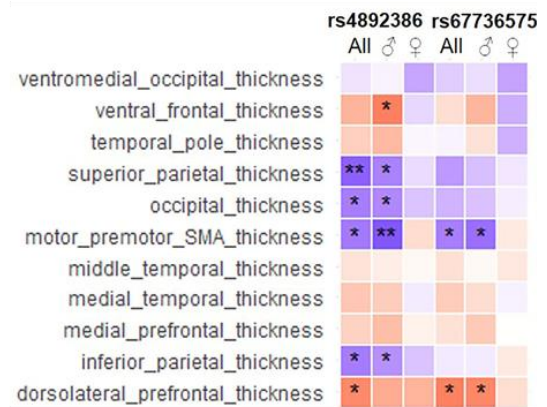

C

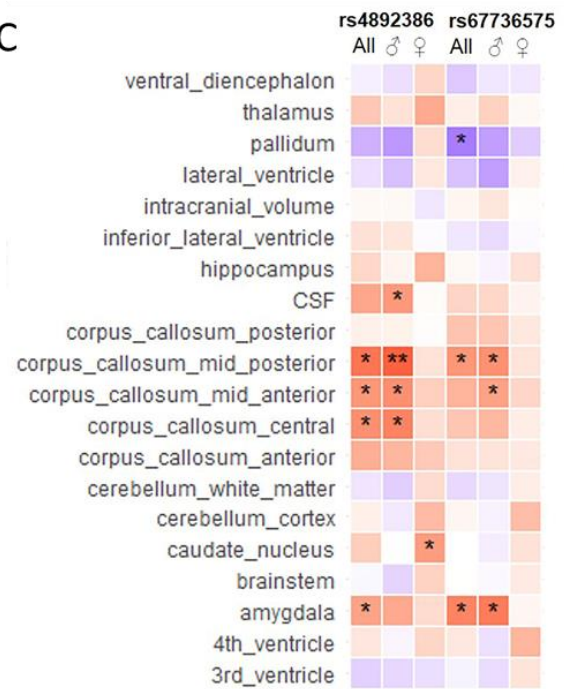

**Supplementary Fig. 11.** Lookup of SNPS mapping to SLC16A2 in brain outcomes. Association of rs4892386 and rs67736575 and specific brain MRI phenotypes: fiber tract fractional anisotropy (A), cortical thickness (B), subcortical volumes (C) in participants of the UK Biobank were assessed using an additive model, in sex-specific and joint analyses adjusting for age, Euler number, 10 genomic principal components, BrainDx, and global brain measures (mean cortical thickness and total surface area for thickness and area phenotypes, respectively). Multiple-testing adjustment was applied at 3 levels, nominal  $P < 0.05$ , denoted by \*; categorical, denoted by \*\* (i.e., Specific brain thickness 11 traits \* 2 SNPs  $P < 0.0023$ . Subcortical volumes 20 traits \* 2 SNPs  $P < 0.00125$ . Fiber tract anisotropy, 58 traits \* 2 SNPs  $P < 0.0009$ ); and study-wise, denoted by \*\*\*, 18 traits \* 2 SNPs;  $P < 0.0004$ . Exact P values are provided in Supplementary Table 5.

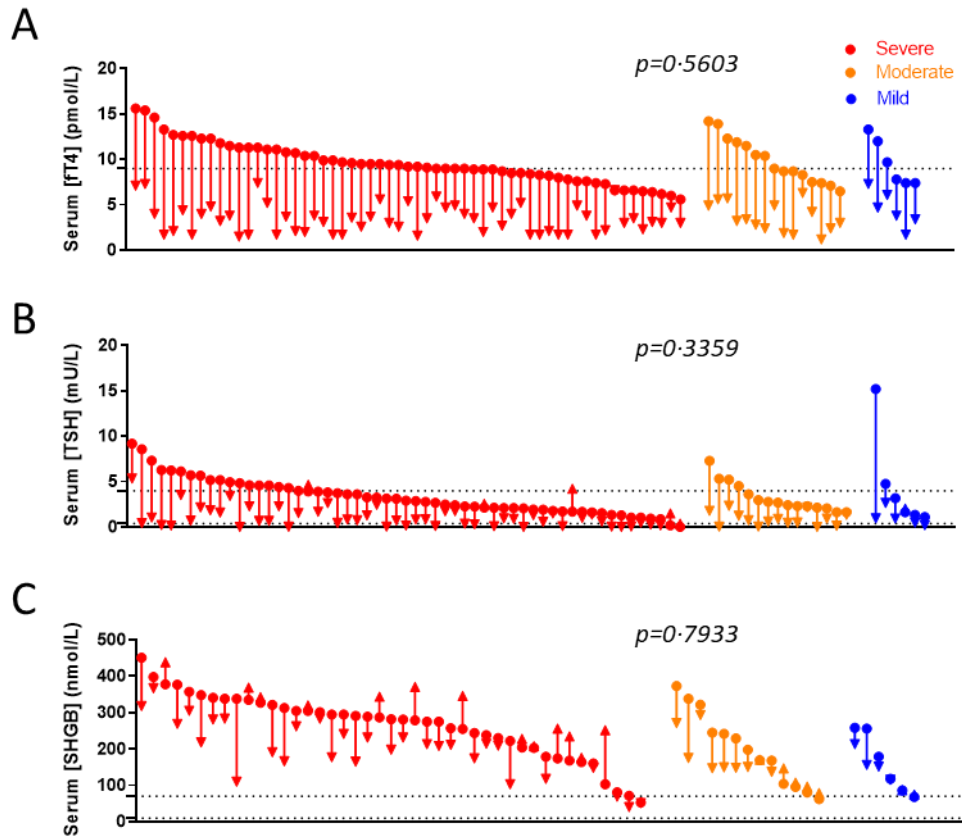

**Supplementary Fig. 12.** Disease outcomes in patients treated with Triac. Changes from baseline to last available follow-up visit in serum concentrations of FT4 (A), TSH (B) and SHBG (C). Dashed lines represent reference intervals (and lower limit of normal in (A)). Source data are provided as a Source Data file.

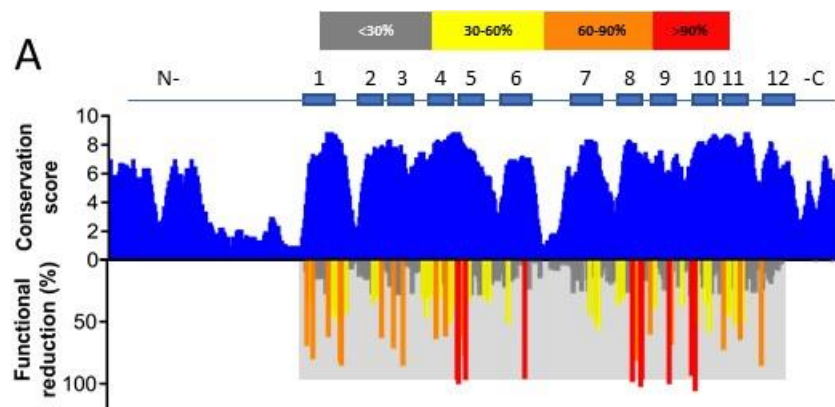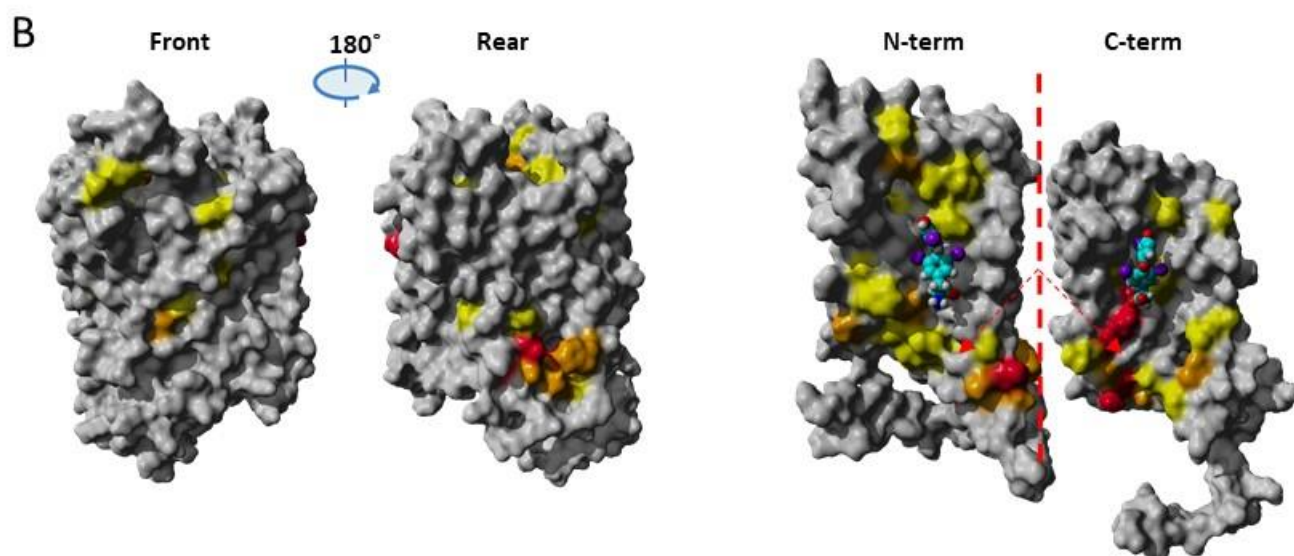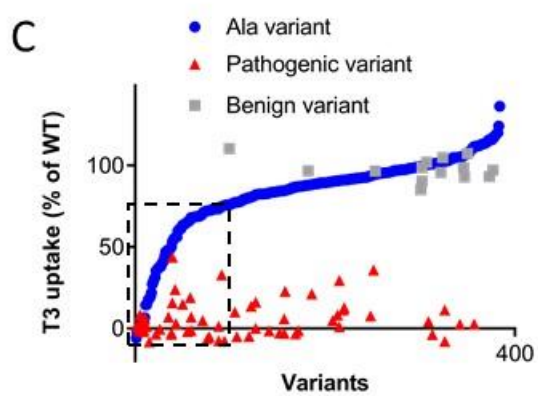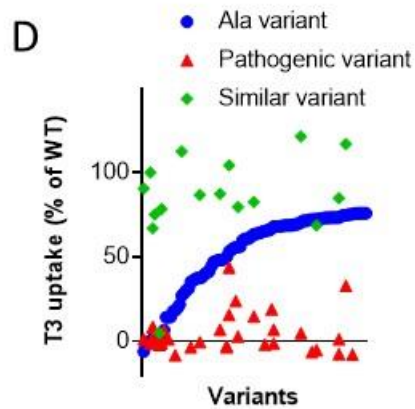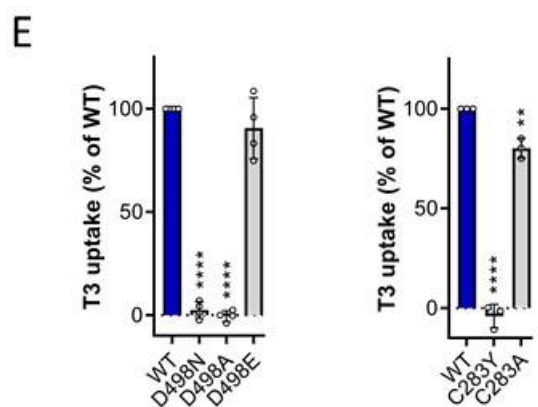

**Supplementary Fig. 13.** (A) (upper part) Conservation analysis of human MCT8 with 73 species. (lower part) T3 transport capacity of all MCT8 Ala variants shown as functional impact in JEG-3 cells. (red: >90-100%, orange: 90-60%, yellow: 30-60%, grey: 0-30% functional reduction with WT MCT8 set as 0% impact). Grey box indicates boundaries for Ala scanning (Pro169 – His575).

(B) Color-coded mapping (see A) of functional impact identified through alanine scanning onto the MCT8 homology structure in outward-open conformation. (left panel) frontal view and rear view of MCT8 and (right panel) inside views (vertical section of frontal view) of the N-terminal (left) and C-terminal (right) halves of the MCT8 protein.

(C) T3 uptake capacity of all tested Ala variants (blue; ranked from 0% to 100% transport capacity), LoF patient variants (red), and benign non-synonymous missense variants (grey). Patients variants affecting residues within the dashed box are likely pathogenic due to the loss of a critical native residue, whereas patient variants affecting other residue are likely pathogenic due to the introduction of an unfavourable residue.

(D) T3 uptake capacity in selected panel (dashed box in Fig. 3c) of Ala variants (blue), LoF patient variants (red), and artificial variants, where the native residue at the position of patient variant was replaced by a residue with similar properties (dark grey).

(E) T3 transport capacity (mean  $\pm$  s.e.m.) in JEG-3 cells expressing WT (set as 100%) or mutant MCT8. P values were calculated using One-way ANOVA with Dunnet's multiple comparisons post-test; \*\* $p < 0.005$ , \*\*\*\*  $p < 0.0001$ . Exact P values are provided in Supplementary Data 1. Source data are provided as a Source Data file.

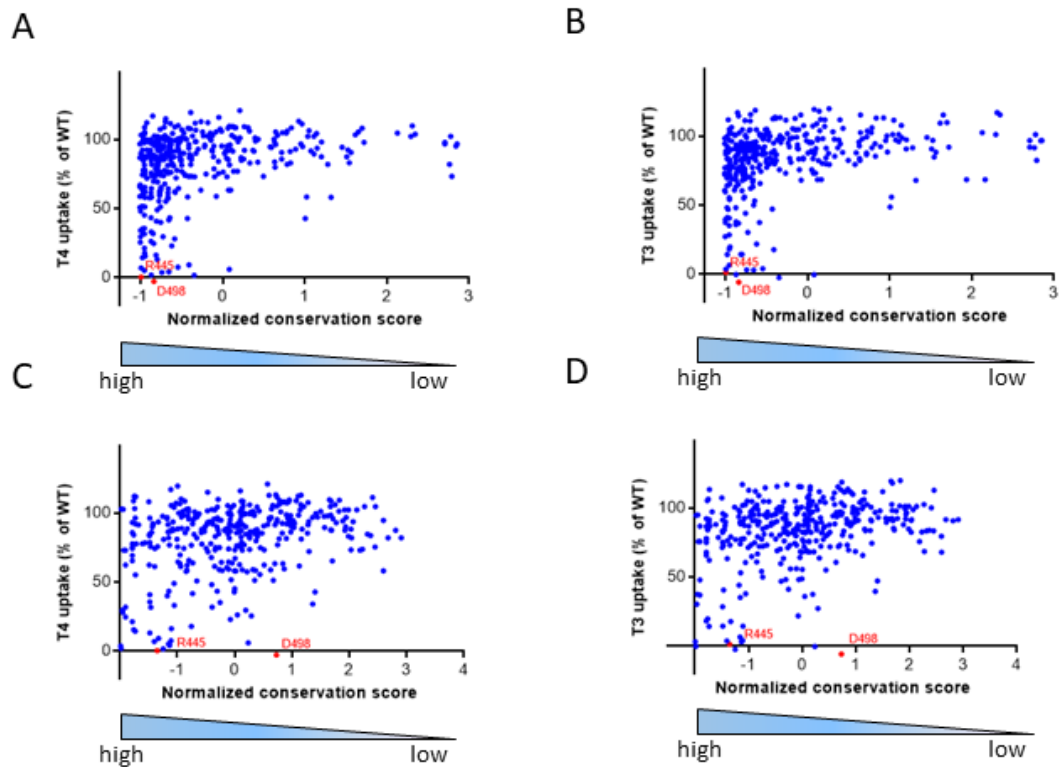

**Supplementary Fig. 14.** Thyroid hormone transport capacity and conservations scores. (A) T4 uptake vs conservation score across MCT8 in other species (all); (B) T3 uptake vs conservation score across MCT8 in other species (all); (C) T4 uptake vs conservation score across human MCT-family members; (D) T3 uptake vs conservation score across human MCT-family members. Arg445 and Asp498 are plotted as exemplary critical residues. Source data are provided as a Source Data file.





hsMCT8 SSI<sup>E</sup>SMS<sup>F</sup>PFL<sup>I</sup>RMLGDKIKLAQTFQV<sup>L</sup>STFMFVLMLLSLT<sup>R</sup>RPLLPSSQDTPSKR-GVR 297  
 hsMCT10 SSVFTIILLPLLRVLIDSVGLFYTLRVLCIFMFVLFAGFTYRPLATSTKDKESGGSGSS 269  
 hsMCT9 SSVGLFIYAALQRMVLEFYGLDGLLIVGALALNILACGSLMRPLQSSDCPLPKKI-APE 205  
 hsMCT14 TGF<sup>G</sup>TFLMTVLKYLCAEY<sup>G</sup>WRNAML<sup>I</sup>QGA<sup>V</sup>SLNLCVCGALMRPLSPGKNPNDPGEK<sup>D</sup>VR 227  
 hsMCT5 MGL-TFLLAPFTKFLIDL<sup>D</sup>YDWTGALILFGAIALNLVPSSMLLRPIHIKSENNSGIKDKGS 213  
 hsMCT12 SGIGTFILAPVQ<sup>L</sup>LIEQ<sup>F</sup>SWR<sup>G</sup>ALLILGGFVLNLCVCGALMRPITLKEDHTTEQ<sup>N</sup>HVC 242  
 hsMCT6 VSLGITLWPLLSRYLLENL<sup>G</sup>WRGTFLVFGGIFLHCCICGAIIRPVATSVAPETKEC<sup>P</sup>PPP 207  
 hsMCT1 SPVFLCTLAPLNQ<sup>V</sup>FFGIFGWRGSFLILGGLLNCCVAGALMRPIGPKPT<sup>K</sup>AGKDKSKAS 213  
 hsMCT2 SPVFLSSLAPFNQ<sup>Y</sup>LFNTFGWKGSFLILGSLLNACVAGSLMRPLGPNQ<sup>T</sup>TSKSKNKTGK 213  
 hsMCT3 SPVFLSALSPLGQ<sup>L</sup>LLERFGWRGGFLLGGLLHCCACGAVMRPPPGPGPRPRDSAG-- 210  
 hsMCT4 SPVFLCALSPLGQ<sup>L</sup>LLQDRY<sup>G</sup>WRGGFLLGGLLNCCVCAALMRPLVVTAQ----- 205  
 hsMCT7 ECF<sup>A</sup>VAFAPAIMALKERIGWRYSL<sup>L</sup>FVGLLQ<sup>N</sup>IVIFGALLRP<sup>I</sup>FIRGPASPKIVIQEN 218  
 hsMCT11 NGASSLL<sup>L</sup>LAPALQ<sup>L</sup>LLDTFGWRGALL<sup>L</sup>LGAITLHLTPCGALL<sup>L</sup>PLVLP<sup>G</sup>DPAP----- 226  
 hsMCT13 VGLSSFTFAPFFQ<sup>W</sup>LLSHYAWRGSLL<sup>L</sup>VSALS<sup>L</sup>HLVACGALLRPPSLAEDPAVG----- 201  
 : : . . : . \*  
 hsMCT8 TLH----- 300  
 hsMCT10 LFS----- 272  
 hsMCT9 DLPDKYS----IYNEKGKNLEENINILDKSYSSSEKCRITLANGDWKQDSLLHKNPTVTH 261  
 hsMCT14 GLPAHSTESVKSTGQ<sup>Q</sup>GRTEEDGGLG---NEETLCDLQA-----QEC<sup>P</sup>DQAG 272  
 hsMCT5 SL<sup>S</sup>AHGPEAH----ATETHCHETEESTI---KDSTTQKAGLPSKNLTVSQNQSEEFYNGP 266  
 hsMCT12 RTQ-----KED-----IKRVSPYSSL 258  
 hsMCT6 PET----- 210  
 hsMCT1 LEKAGK-----SGV---KKD-----LHDAN--TDL 233  
 hsMCT2 TE-----DD 217  
 hsMCT3 -DRAGD-----APG---EAE-----ADG 224  
 hsMCT4 ----- 205  
 hsMCT7 RKEAQYMLEN---EKTRTSIDSIDSGV---ELTTS-----PKNVPTHTNLELEPKADM 265  
 hsMCT11 ----- 226  
 hsMCT13 ----- 201  
 hsMCT8 -Q-----RFLAQLRK-----YFNMRVF-RQRTYRIWAF<sup>G</sup>-IAAAALG 334  
 hsMCT10 -R-----KKFSPPKK-----IFNFAIF-KVTAYAVWAVG-IPLALFG 306  
 hsMCT9 TKEPETYKKKVAEQTYFCKQLAKRKWQLYKNYCGETVALF-KNKVFSALFIAILLFDIGG 320  
 hsMCT14 HRKNMCA<sup>L</sup>RILKTVSWLTMRVRKGFEDWYSGYFGT-ASLF-TNRMFVAFIFWA-LFAYSS 329  
 hsMCT5 NR-NRLLLSDEESDKVISWSCKQ-----LFDISLF-RNPFFYIFTWS-FLLSQLA 314  
 hsMCT12 TK--EWAQT----CLCCCLQ<sup>Q</sup>EYS-----FL-----LMSDFVVLAVS-VLFMAYG 296  
 hsMCT6 ----PALG----CLAACGR<sup>T</sup>IQR-----HLAFDILRHNTGYCVYILG-VMWSVLG 251  
 hsMCT1 IG--RHPKQ---EKRSVFQ<sup>T</sup>INQ-----FLDLTLF-THRGFLLYLSG-NVIMFEG 276  
 hsMCT2 SS--PKKIK---TKKSTWEKVNK-----YLD<sup>F</sup>SLF-KHRGFLIYLSG-NVIMFLG 260  
 hsMCT3 A---GLQ<sup>L</sup>R---EAS<sup>P</sup>WVRPRRR-----LLDLAVC-TDRAFAVYAVT-KFLMALG 266  
 hsMCT4 -----PGSGPPRPSRR-----LLDL<sup>S</sup>VF-RDRGFVLYAVA-ASVMVLG 241  
 hsMCT7 QQ--VLVK---TS<sup>P</sup>RPSEKKAP-----LLDFSIL-KEKSFICYALF-GLFATLG 307  
 hsMCT11 -----PR-SPLA-----ALGLSLF-TRRAFSIFALG-TALVGGG 257  
 hsMCT13 -----GPR-AQ-----LTSLL-HHGPFLRYTVA-LTLINTG 229  
 : .  
 hsMCT8 YFVPYVHL<sup>M</sup>KYVEEFSEIKETWV-LLVCIGAT<sup>S</sup>GLG<sup>L</sup>VS<sup>C</sup>HI<sup>S</sup>SI<sup>P</sup>GLK<sup>K</sup>-IYLQVL 392  
 hsMCT10 YFVPYVHLMKHVNERFQDEKNKEV-VLMCIGVTS<sup>G</sup>VGRLLFGRIADYVPGVK<sup>K</sup>-VYLQVL 364  
 hsMCT9 -FPPSLMEDVARSSNVKEEFIMPLISIIIGIMTAVGKLLLGILADFKWINTLYLYVAT- 378  
 hsMCT14 FVIPFIHLPEIVNLYNLSEQNDVFLTSIIAIVHIFGKVLGVIADLPCISVWNVFLLA- 388  
 hsMCT5 YFIPTFHLVARAKTLGIDIMDASY-LVSVAGILETVS<sup>Q</sup>IISG<sup>W</sup>ADQN<sup>W</sup>IKKYHYHKS<sup>Y</sup>- 372  
 hsMCT12 CSPLEFVYLV<sup>P</sup>YALSVGVSHQQAAL-LMSILGVIDIIGNITFGWLTDRRCLKNYQV<sup>C</sup>YLF 355  
 hsMCT6 FPLPQVFLV<sup>P</sup>YAMWHSVDEQQAAL-LISII<sup>G</sup>FSNIFLRPLAGLMAGRP<sup>A</sup>FA<sup>S</sup>HRKYL<sup>F</sup>SL 310  
 hsMCT1 L<sup>L</sup>AP<sup>L</sup>VFLSSYGKSQHYSEKSAF-LLSILAFV<sup>M</sup>VA<sup>P</sup>SMGLVANTKPIRPRIQYFFAA 335  
 hsMCT2 FFAP<sup>I</sup>IIFLAPYAKDQ<sup>G</sup>IDEYSAAF-LLSVMAFVDMFAR<sup>P</sup>SVGLIA<sup>S</sup>SKYIRPRIQYFFSF 319  
 hsMCT3 LFVPAILLVNYAKDAGVPD<sup>T</sup>DAAF-LLSIVGFVDIVAR<sup>P</sup>ACGALAGLARLRPHV<sup>P</sup>YLFSL 325  
 hsMCT4 LFVPPV<sup>F</sup>VVS<sup>Y</sup>AKDLGVPD<sup>T</sup>KAAF-LLTILGFIDIFA<sup>P</sup>AAGFVAGLGKVR<sup>P</sup>YSV<sup>L</sup>YLF 300  
 hsMCT7 FFAPSLYIIPLGISLGIDQDRAAF-LLSTMAIAEVFGRIGAGFVLNREPIRKIYIELIC- 365  
 hsMCT11 YFVPYVHLAPHALDRGLGGYGAAL-VVAVAA<sup>M</sup>GDA<sup>G</sup>ARLVCGWLADQGWVPLPRL<sup>L</sup>AVF- 315  
 hsMCT13 YFIPYLHLVAHLQDLWDPLPA<sup>A</sup>AF-LLSVVAISDLVGRV<sup>V</sup>SGWLDAVPGPVTRLLMLW- 287  
 . : : . . \* : .



|                      |                                                               |     |
|----------------------|---------------------------------------------------------------|-----|
| hsMCT8               | SFLLGLMSM-----IPLCRDFGG--LIVVCLFLCIGFFITIMAF--IAELVGP         | 443 |
| hsMCT10              | SFFFIGLMSMM-----IPLCSIFGA--LIAVCLIMGLFDGCFISIMAP--IAFELVGAQD  | 415 |
| hsMCT9               | -LIIMGLALCA-----IPFAKSYVT--LALLSGILGFLTGNWS-IFPY--VTTKTVGIEK  | 427 |
| hsMCT14              | -NFTLVLSIFI-----LPLMHTYAG--LAVICALIGFSSSGYFS-LMPV--VTEDLVGIEH | 437 |
| hsMCT5               | -LILCGITNLL-----APLATTFFPL--LMTYTICFAIFAGGYLALILP--VLVDLCRNST | 422 |
| hsMCT12              | AVGMDGLCYLC-----LPLQLSLPL--LVPSCTFGYFDGAYVTILPV--VTTEIVGTT    | 406 |
| hsMCT6               | ALLNGLTNLV-----CAASGDFWV--LVGYCLAYSVMMSGIGALIFQ--VLMDIVPMDQ   | 361 |
| hsMCT1               | SVVANGVCHML-----APLSTTYVG--FCVYAGFFGFAIGWLSVLF--TLMDLVGPQR    | 386 |
| hsMCT2               | AIMFNGVCHLL-----CPLAQDYTS--LVLYAVFFGLGIGSVSVLF--TLMDLVGAPR    | 370 |
| hsMCT3               | ALLANGLTDL-----SARARSYGA--LVAFCVAFGLSYGMVGALQFE--VLMAAVGAPR   | 376 |
| hsMCT4               | SMFFNGLADLA-----GSTAGDYGG--LVVFCIFFGISYGMVGALQFE--VLMAIVGTHK  | 351 |
| hsMCT7               | -VILLTVSLFAFT-----FATEFWG--LMSCSIFFGFMVGTIGGTHIPLLAEDDVVGIEK  | 417 |
| hsMCT11              | -GALTGLGLVWVGLVPVVGGEESWGGLLAAAVAYGLSAGSYAPLVFG--VLPGLVGVG    | 372 |
| hsMCT13              | -TTLTGVSLALFP--VAQ--APTALVALAVAYGFTSGALAPLAFS--VLPGLIGTRR     | 337 |
| :                    |                                                               |     |
| hsMCT8               | ASQAIGYLGLMMALEMIAPPIAGLLRNCFGDYHVAIFYFAGVPPPIGAVILFFVPLMHQ-  | 502 |
| hsMCT10              | VSQAIGFLLGFMSIPMTVGPPPIAGLLRDKLSYDVAFYLAGVPPPIGAVILCFIPWIHS-  | 474 |
| hsMCT9               | LAHAYGILMFFAGLGNLGPPIVGFYDWTQTYDIAFYFSGFCVLLGGFILLLAALPSW-    | 486 |
| hsMCT14              | LANAYGIIICANGISALLGPPFAGWIYDITQKYDFSFYICGLLYMIGILFLLIQPCIRII  | 497 |
| hsMCT5               | VNRFGLGLASFFAGMAVLGSPPIAGWLYDYTYNGSFYFSGICYLLSSVSFFVPLAE--    | 480 |
| hsMCT12              | LSSALGVVYFLHAVPYLVSPPIAGRLVDTTGSYTAFFLLCGFSMIFSSVLLGFARLIK--  | 464 |
| hsMCT6               | FPRALGLFTVLDGLAFILSPPLAGLLLDATNNSYVYFMSFFLISAALFMG-GSF--Y-    | 417 |
| hsMCT1               | FSSAVGLVTIVECCPVLLGPPLLGRLNMYGDKYTYWACGVLLIISGIYLFIMGINY-     | 445 |
| hsMCT2               | FSSAVGLVTIVECCPVLLGPPLAGKLVDLTGEYKMYMSCGAIVVAASVWLLIGNAINY-   | 429 |
| hsMCT3               | FPSALGLVLLVEAAVLI GPPSAGRLVDALKNYEIIIFYLAGSEVALAGVFMVATNCL-   | 435 |
| hsMCT4               | FSSAIGLVLLMEAVAVLVGPPSGGKLLDATHVYMYVFI LAGAEVLTSSLILLGNFFCI-  | 410 |
| hsMCT7               | MSSAAGVYIFIQSIAGLAGPPLAGLLVDQSKIYSRAFYS CAAGMALAAVCLALVRPCKM- | 476 |
| hsMCT11              | VVQATGLVMMMLSLGGLGPPPLSGFLRDETGDFTASFLLSGSL-ILSGSFYIYGLPRAL-  | 430 |
| hsMCT13              | IYCGLGLQMIESIGLLGPPLSGYLRDVTGNYSFVVAGAF-LLSGSGILLTLPHFF-      | 395 |
| * . ** * : : : . . : |                                                               |     |
| hsMCT8               | RMFKKEQRDSS-----KDK-----MLAPDPDPNGELL                         | 529 |
| hsMCT10              | KKQREISKTTG-----KEK-----MEKMLENQNS-LL                         | 500 |
| hsMCT9               | DTCNKQLPKPAPT-----TFLYKVASNV-----                             | 509 |
| hsMCT14              | EQSRKRYMDGA-----HV-----                                       | 510 |
| hsMCT5               | ----RW--KNSLT-----                                            | 487 |
| hsMCT12              | ----RM-RKTQLQFI AKESDPKQLWTNGSVAYSVAARELDQ-----KHGEPVATAV-    | 510 |
| hsMCT6               | ALQKKEQKQKQAVAADALERDLFLEAK-----DGPQKQSRPEIMCQSSRP RPAGV      | 467 |
| hsMCT1               | RLLAKEQKANEQKKESEETSIDVAGKPNVTKAAESPDQKDT-----EGGPKEES-       | 498 |
| hsMCT2               | RLLAKEKEENARQKTRESEPLSKSK-HSEDVNVKVSNA-----QSVTSERET-         | 476 |
| hsMCT3               | RCAKAAPSGPGTEGGASDTEDAE-AEGDSEPLPVVAEPPGNLEALEVLSARGEPTPEIE   | 494 |
| hsMCT4               | RKKPKKE---PQPEVAAAEKELH-KPPAD-----SGVDLREVEHFLKAEPEKNGEVV     | 458 |
| hsMCT7               | GLCQHHS-GETKVVSHRKTLDIP-----EDFLEMDLAKNEHRV                   | 516 |
| hsMCT11              | PSCGPASP-PA-TPPPE-TGELLAP-----QAVLLSPGGPGSTLD                 | 468 |
| hsMCT13              | CFSTTTSG-PQ-DLVTEALDTKVPLP-----KEGLEED-----                   | 426 |
|                      |                                                               |     |
| hsMCT8               | ----PGSPN----PEEPI-----                                       | 539 |
| hsMCT10              | ----SSSSGMFKKESDSII-----                                      | 515 |
| hsMCT9               | -----                                                         | 509 |
| hsMCT14              | -----                                                         | 510 |
| hsMCT5               | -----                                                         | 487 |
| hsMCT12              | -----PGYSLT-----                                              | 516 |
| hsMCT6               | NKHLWGCPASSRTSHEWLLWPKAVLQAKQTALGWNSPT                        | 505 |
| hsMCT1               | -----P-----V-----                                             | 500 |
| hsMCT2               | -----N-----I-----                                             | 478 |
| hsMCT3               | -----ARP-----RLAAESV-----                                     | 504 |
| hsMCT4               | -----HTP-----ETSV-----                                        | 465 |
| hsMCT7               | --HVQMEP-----V-----                                           | 523 |
| hsMCT11              | --T-TC-----                                                   | 471 |
| hsMCT13              | -----                                                         | 426 |

**Supplementary Fig. 15.** Multiple sequence alignment of the human MCT-family by Clustal omega. Highlighted are the residues at which an Ala substituent results in a functional reduction of >70% (red), 40-70% (magenta), 10-40% (yellow) compared to WT (T4 uptake in COS-1 cells). In red font are the

residues at which pathogenic variants have been identified, substituting the original residue in residue(s) other than an Ala. MCT8 represents the long isoform. Indicated variants in MCTs other than MCT8 are derived from an exhaustive literature search <sup>15, 38, 39, 40, 41, 42, 43, 44</sup>.





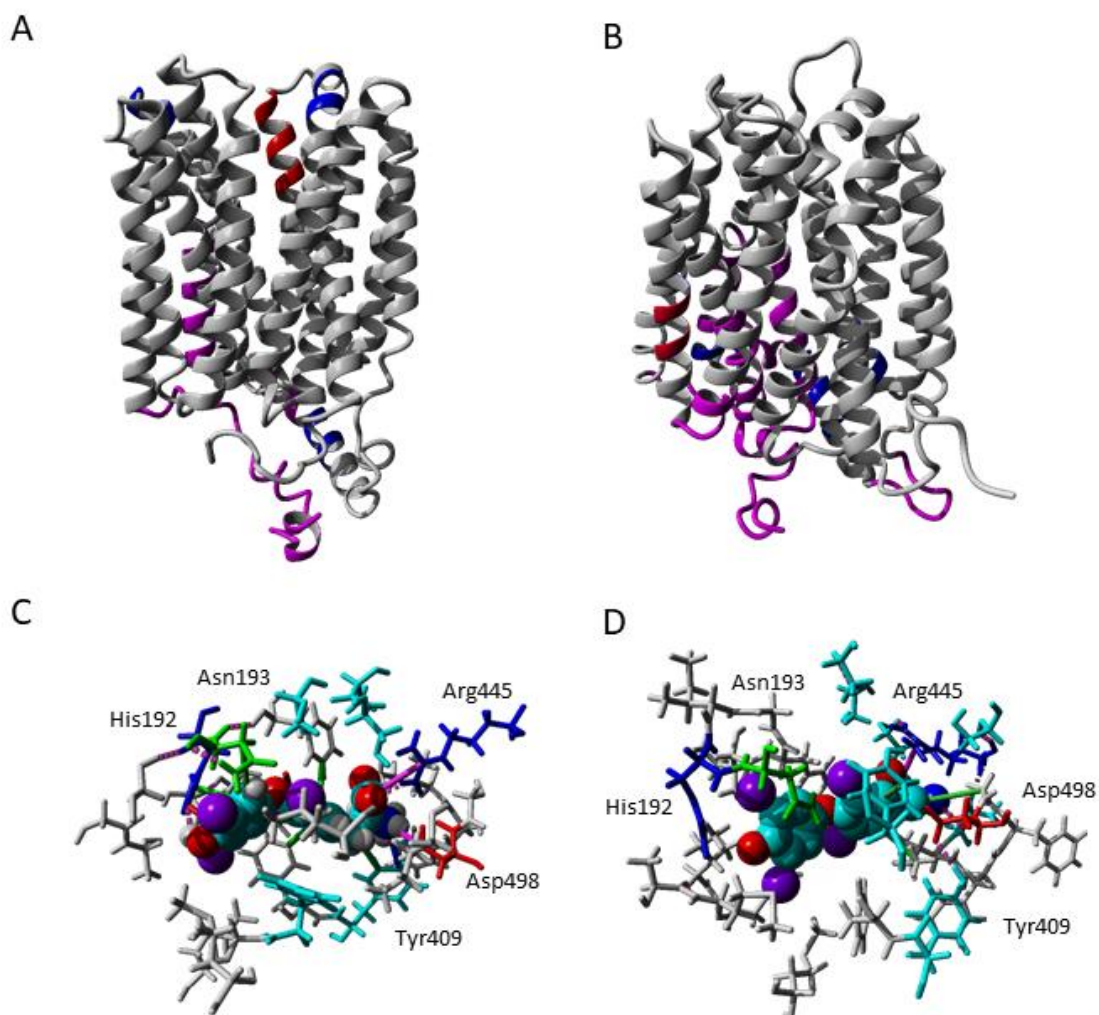

**Supplementary Fig. 18.** Homology model of MCT8 in outward-open (A) and inward-open (B) configuration. Both models were predominantly based on the EM-structures of MCT1 (PDB# 7CKO and 7DA5, grey residues), and further improved into a hybrid model with elements of MFS (6HCL, magenta residues), FucP (3O7Q, blue residues), and MCT2 (7BP3, red residues). Residues composing the substrate binding pocket in outward-open (C) and inward-open (D) are shown in sticks (view: outside → inside). A T4 molecule docked at the bottom of the substrate binding center is shown as a ball-structure. Blue: basic residues, red: acidic residues, turquoise: hydroxylic residues, green: amines, grey: hydrophobic residues.



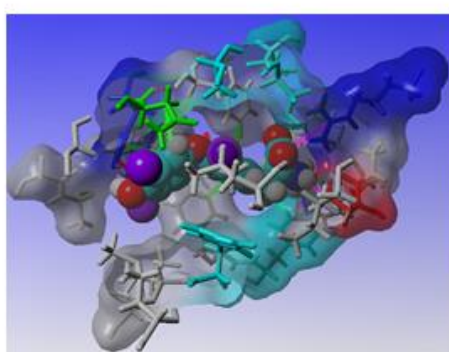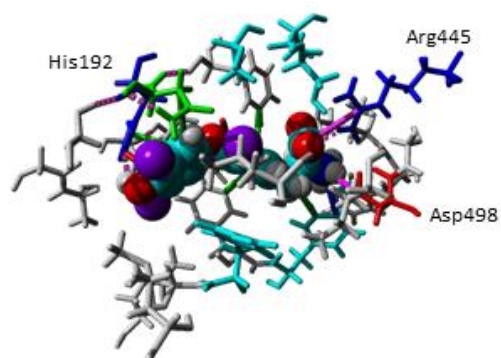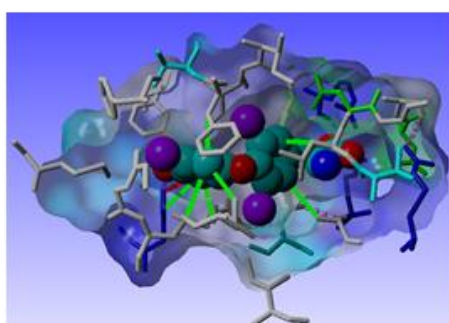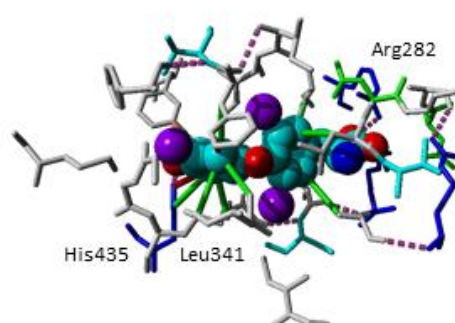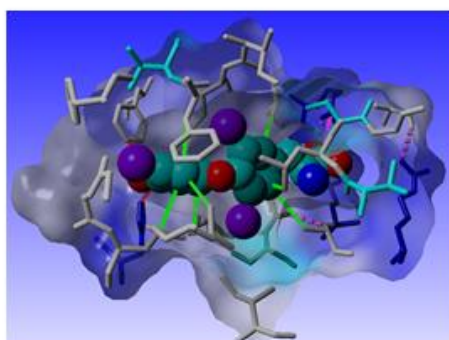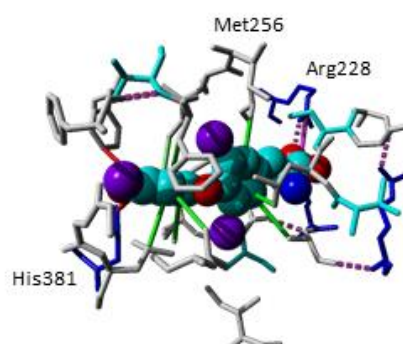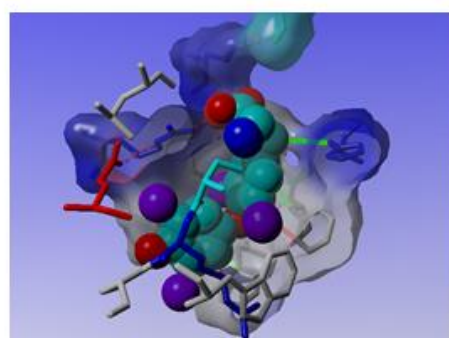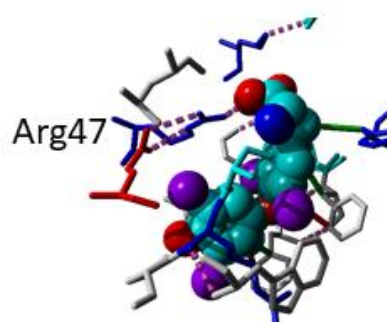

**Supplementary Fig. 19.** Comparison of substrate binding pockets in major thyroid hormone interacting proteins. Residues composing the substrate binding center in the homology model of MCT8 in outward-open conformation (see Supplementary Fig. 18C), and the crystal structures of TR $\beta$

(PDB#3gws), TR $\alpha$  (PDB#2h77), or the thyroid hormone-interacting protein mu-crystallin (PDB#4bva).

Indicated are the Arg and His residues as well as some of the hydrophobic residues known to exert a critical function for the involved protein. Blue: basic residues, red: acidic residues, turquoise: hydroxylic residues, green: amines, grey: hydrophobic residues.

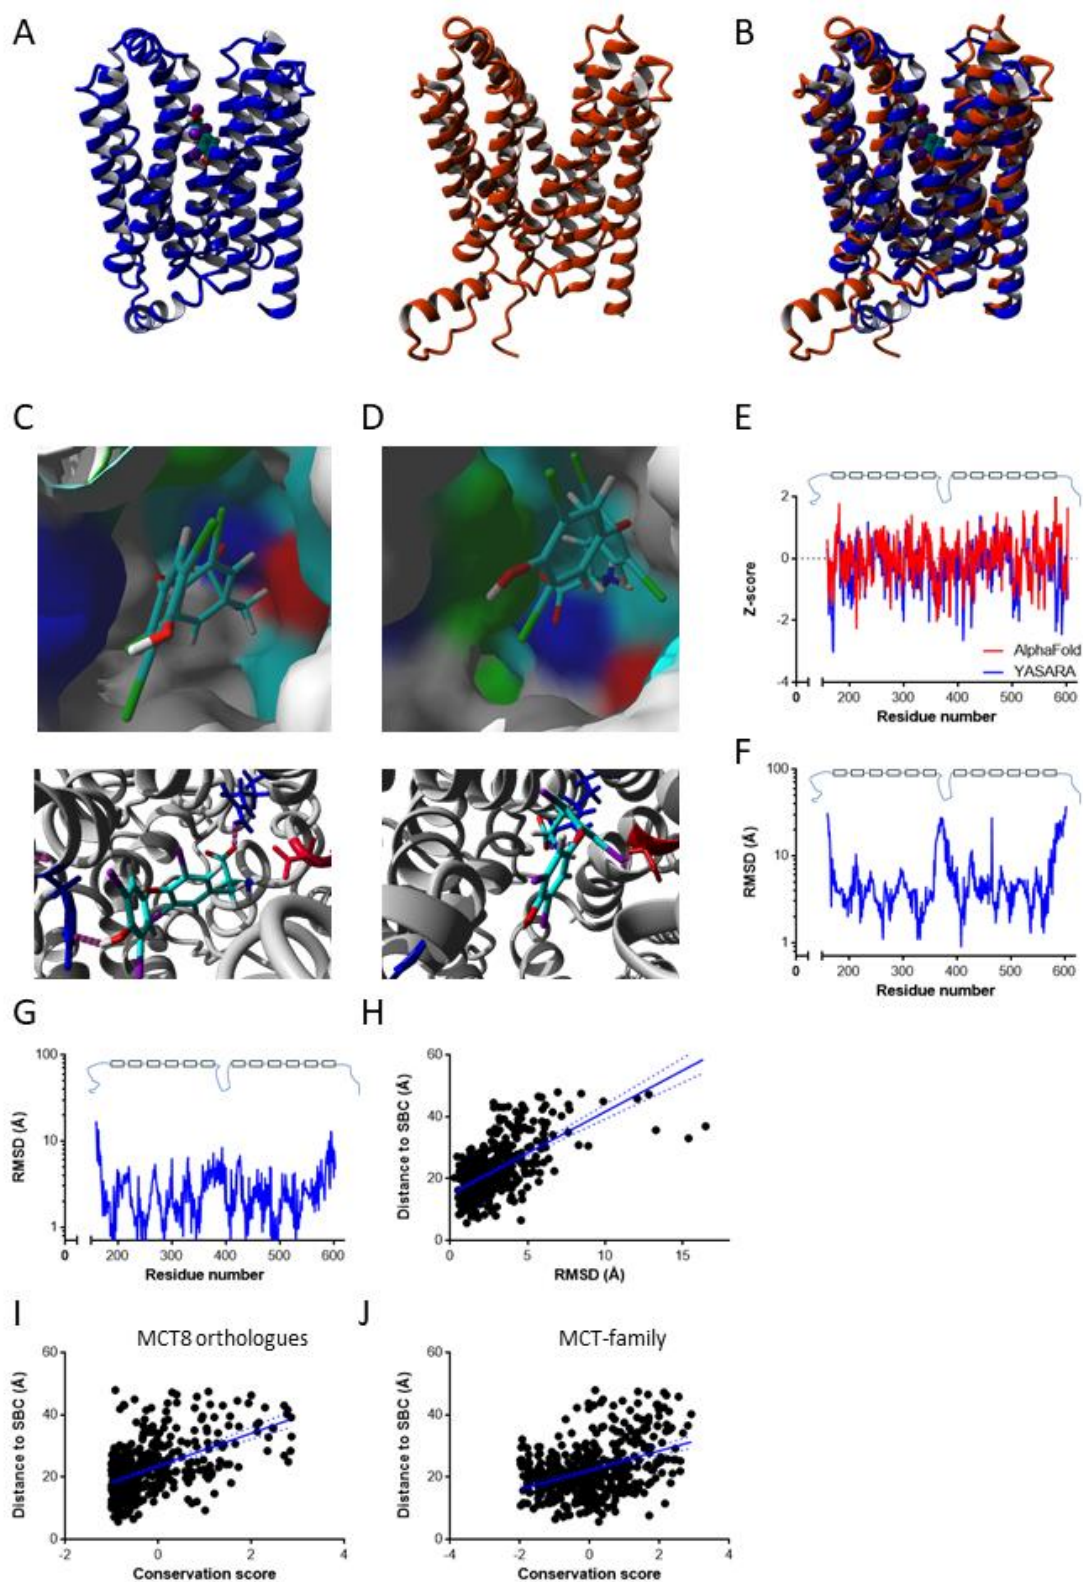

**Supplementary Fig. 20.** Comparison of MCT8 homology model to AlphaFold-2 derived structural prediction. (A) MCT8 homology model using YASARA Structure (left) or AlphaFold2 (right) and their overlay (B). Zoom-in of the substrate binding center of the YASARA-based model (C) and AlphaFold2



model (D) in which a T4 molecule has been docked. Note the different orientation of the His192 residue, which is, in line with available experimental data <sup>4</sup>, fully exposed via the substrate channel in (C), but not in (D). (E) Comparison of the model reliability at residue level based on Z-scores <sup>45</sup>. (F) RMSD per residue comparing the YASARA and AlphaFold2 model, with highest RMSD in the intracellular N- and C-terminus as well as the intracellular and extracellular loops. (G) RMSD per residue after 2 ns molecular dynamic simulation of the YASARA model, showing a similar pattern as in (F). Correlation analysis between the RMSD shown in (G) (H), conservation score based on all MCT8 orthologues (I) or all human MCT-family members (J), and the distance of each residue to the substrate binding center. The lines in (H), (I) and (J) represent the mean with the 95% confidence intervals. Source data are provided as a Source Data file.

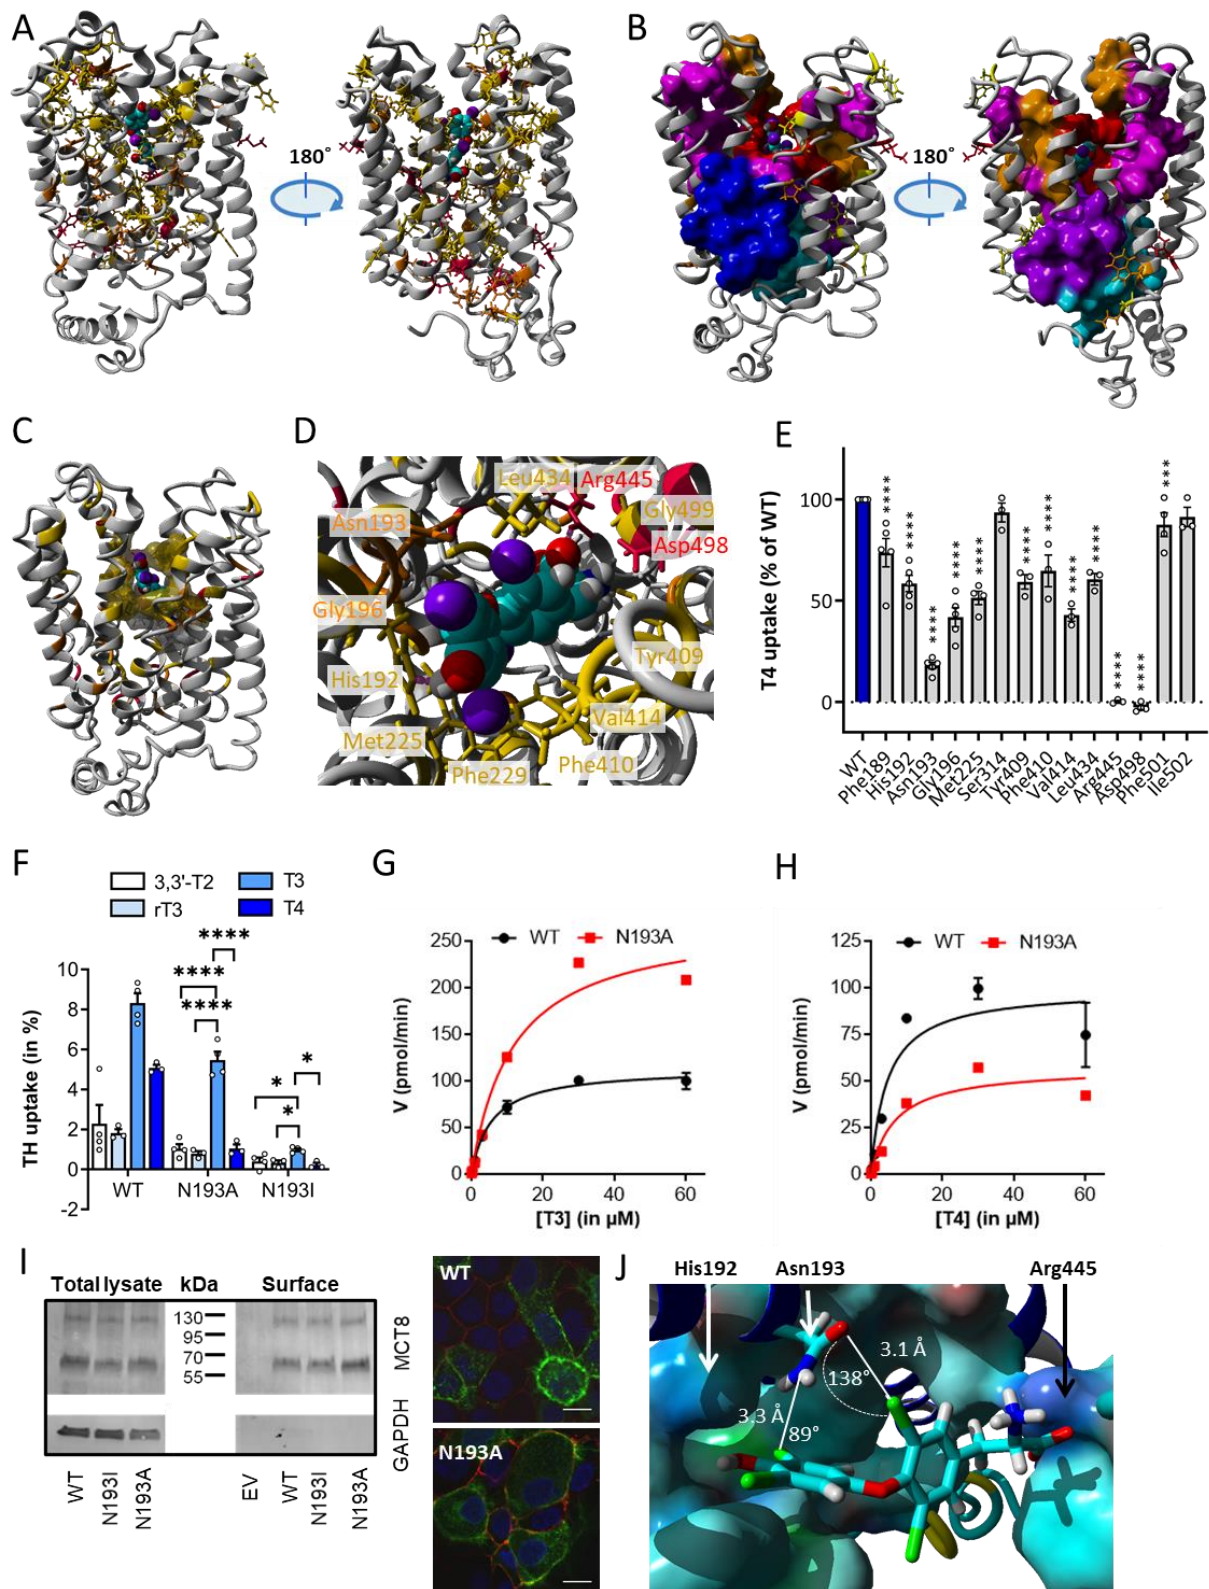

**Supplementary Fig. 21.** Mapping of Ala-screen onto MCT8 homology model – identification of 7 critical regions, including substrate binding pocket. (A) Color-coded mapping of functional impact on T4 transport by MCT8 Ala variants in JEG-3 cells (red: >90-100%, orange: 60-90%, yellow: 30-60%, grey: 0-

30% impact with WT MCT8 set as 0% impact) onto the MCT8 homology structure: frontal view (left panel) and rear view (right panel). (B) Critical functional domains in MCT8: 1) residues at substrate binding center (red), 2) channel-facing residues out substrate binding center (orange), 3) residues supporting substrate-interacting residues in group 1) and 2) (magenta), 4) cluster 1 composed of TMD5 and TMD 8 (purple), 5) cluster 2 composed of TMD2 and TMD11 (dark blue), and 6) a linker region connecting clusters 1 and 2 (light blue), as well as 7) residual residues (side-chains indicated as sticks). (C) Group 1, critical residues identified at the substrate binding center, with a close-up in (D), using the same color-coding as in (A). (E) T4 transport of WT and indicated mutant MCT8 in transiently transfected JEG-3 cells, expressed relative to WT (set as 100%, mean  $\pm$ s.e.m). Dashed lines represent 0% uptake. P values were calculated using One-way ANOVA with Dunnet post-test, \*\*\*  $p < 0.0005$ , \*\*\*\*  $p < 0.0001$ . (F) Similarly, the transport of indicated iodothyronine by WT or N193A mutant MCT8 in JEG-3 cells. Thyroid hormone uptake (mean  $\pm$ s.e.m) is expressed as a percentage of radio-labelled substrate added to the cells at the start of the incubation. P values were calculated using Two-way ANOVA with Bonferroni post-test, \*\*  $p < 0.01$ , \*\*\*  $p < 0.005$ . T3 (G) and T4 (H) transport kinetics (mean  $\pm$ s.e.m) in COS-1 cells in absence of CRYM. Vmax (in pmol/min) and Km (in  $\mu$ M) values were calculated using Michaelis-Menten equation. (I) surface biotinylation in COS-1 and immunocytochemistry in JEG-3 cells, using MCT8-antibody (green), ZO-1-antibody as a membrane marker (red) and DAPI as a nuclear marker (blue). Scale bar corresponds to 15  $\mu$ M. (J) Close-up of the substrate binding center highlighting the N193 in relation to a T4 substrate molecule. The C5-iodine of T4 and the side-chain oxygen of N193 are in close structural proximity ( $\sim 3.1$  Å) with overlapping Van der Waals radii and an  $\sigma$ -hole angle of 130-150°, which is optimal for the formation of a halogen bond between an iodobenzene and the side-chain oxygen of Asn<sup>23</sup>. Simultaneously, the  $\sigma$ -hole of the C5'-iodine is perpendicular to the side-chain nitrogen of N193 at a distance of 3.3 Å, allowing the formation of a second halogen-bond that directing the large outer ring of T4. Exact P values are provided in Supplementary Data 1. Source data are provided as a Source Data file.

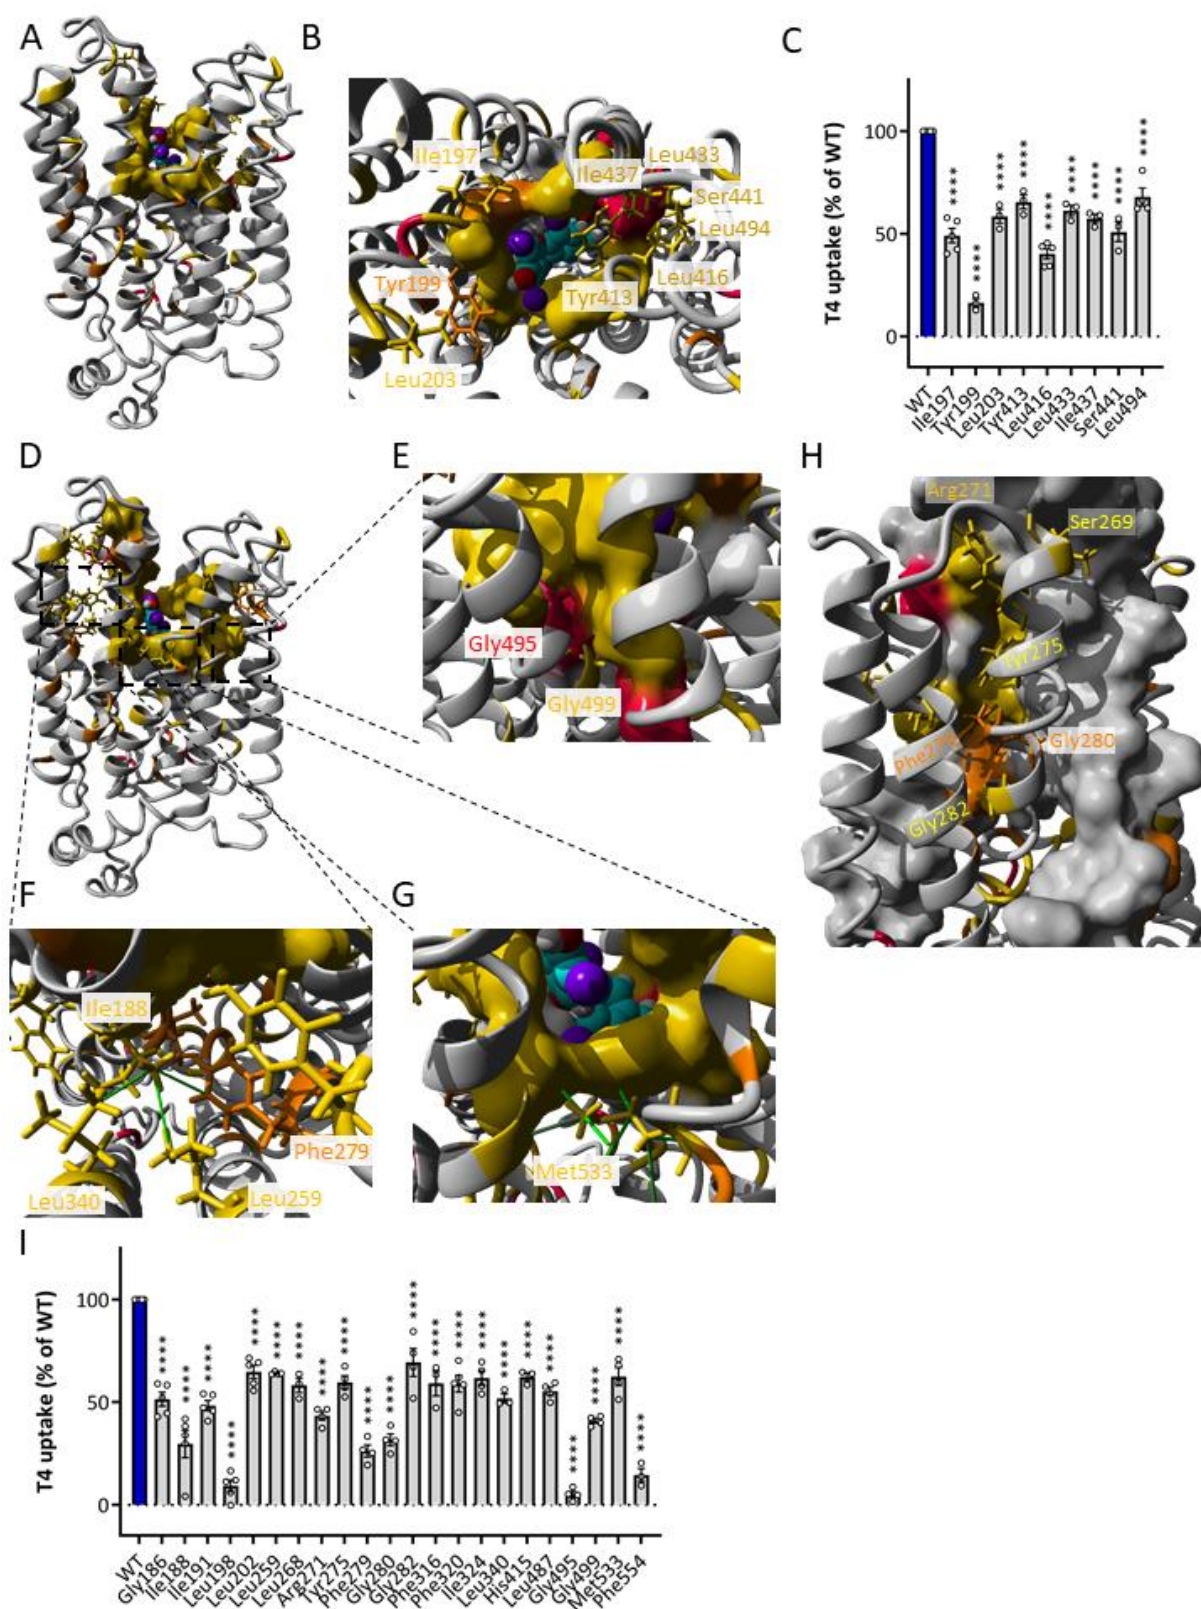

**Supplementary Fig. 22.** Mapping of Ala-screen onto MCT8 homology model – identification of 7 critical regions, including channel-flanking residues (group 2), and supporting residues (group 3). (A) Group 2, critical residues identified along the substrate channel outside the substrate binding center, with a

close-up in (B), color-coded as in Supplementary Fig. 18A. (C) T4 transport of WT and indicated mutant MCT8 in transiently transfected JEG-3 cells, expressed relative to WT MCT8 (set as 100%, mean  $\pm$ s.e.m). P values were calculated using One-way ANOVA with Dunnet post-test, \*\*\*\* p < 0.0001. (D) Group 3: residues supporting substrate-interacting residues in group 1 and 2, by 1) potentially determining the helical structure of the TMDs composing the substrate binding center (e.g. G186, TMD1; G495, TMD10) or 2) their relative position to other TMDs (e.g. I188 and I191, L198 TMD1) (F), or 3) residues located in other TMDs, providing structural support to the TMDs that form the substrate binding center (G), with a particular hotspot in TMD4 (H). (I) T4 transport of WT and indicated mutant MCT8 in transiently transfected JEG-3 cells, expressed relative to WT (set as 100%, mean  $\pm$ s.e.m). P values were calculated using One-way ANOVA with Dunnet post-test, \*\*\*\* p < 0.0001. Dashed lines represent 0% uptake. Source data are provided as a Source Data file.



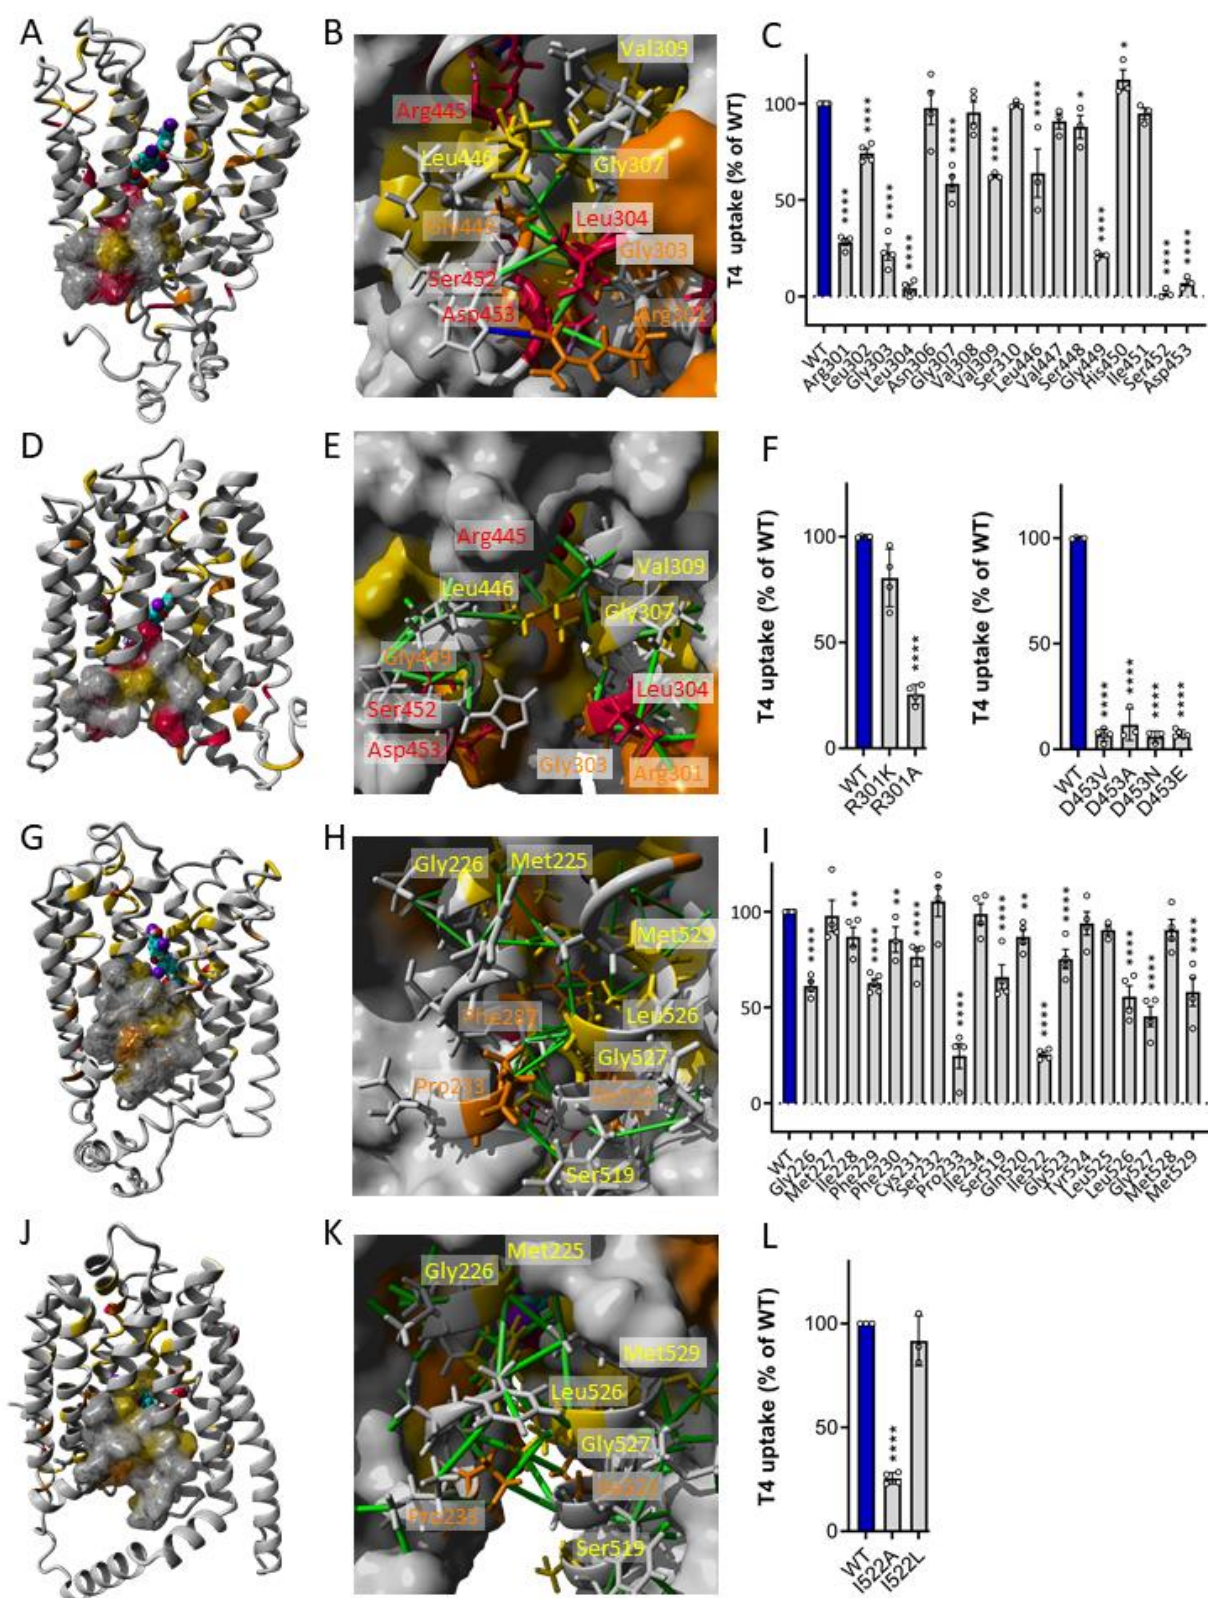

**Supplementary Fig. 23.** Mapping of Ala-screen onto MCT8 homology model – identification of 7 critical regions, including both pairs of rocker-helices (group 4 and 5). (A) Critical residues in group 4: cluster 1 composed of TMD5 and TMD8, connecting the N-terminal and C-terminal half of the MCT8 protein,

depicted in the MCT8 homology model in outward-open conformation, with a close-up in (B). (C) T4 transport of WT and indicated mutant MCT8 in transiently transfected JEG-3 cells, expressed relative to WT (set as 100%, mean  $\pm$ s.e.m). P values were calculated using One-way ANOVA with Dunnet post-test, \*  $p < 0.05$ , \*\*\*\*  $p < 0.0001$ . (D) The same cluster 1 highlighted in the MCT8 homology model in inward-open conformation, with a close-up in (E). Note the loss of interactions between both TMDs in the inward-open conformation, particularly the loss of the interaction between Asp453 and Arg301. (F) The effect of different substitutions of R301 and D453 on T4 transport (WT MCT8 set as 100%, mean  $\pm$ s.e.m), illustrating the importance of local charge and side-chain length. P values were calculated using One-way ANOVA with Dunnet post-test, \*\*\*\*  $p < 0.0001$ . (G) Critical residues in group 5: cluster 2 composed of TMD2 and TMD11, connecting the N-terminal and C-terminal half of the MCT8 protein, depicted in the MCT8 homology model in outward-open conformation, with a close-up in (H). (I) T4 transport of WT and indicated mutant MCT8 in transiently transfected JEG-3 cells, expressed relative to WT (set as 100%, mean  $\pm$ s.e.m). P values were calculated using One-way ANOVA with Dunnet post-test, \*\*  $p < 0.005$ , \*\*\*\*  $p < 0.0001$ . (J) The same cluster 1 highlighted in the MCT8 homology model in inward-open conformation, with a close-up in (K). Note the loss of interactions between both TMDs in the inward-open conformation. (L) The effect of different substitutions of I522 on T4 transport (WT MCT8 set as 100%, mean  $\pm$ s.e.m), illustrating the importance of the branched side-chain. P values were calculated using One-way ANOVA with Dunnet post-test, \*\*\*\*  $p < 0.0001$ . In (B), (E), (H), (K) hydrophobic interactions are depicted as green sticks, electrostatic interactions as purple sticks and cation-pi interactions as blue sticks. Dashed lines represent 0% uptake. Source data are provided as a Source Data file.

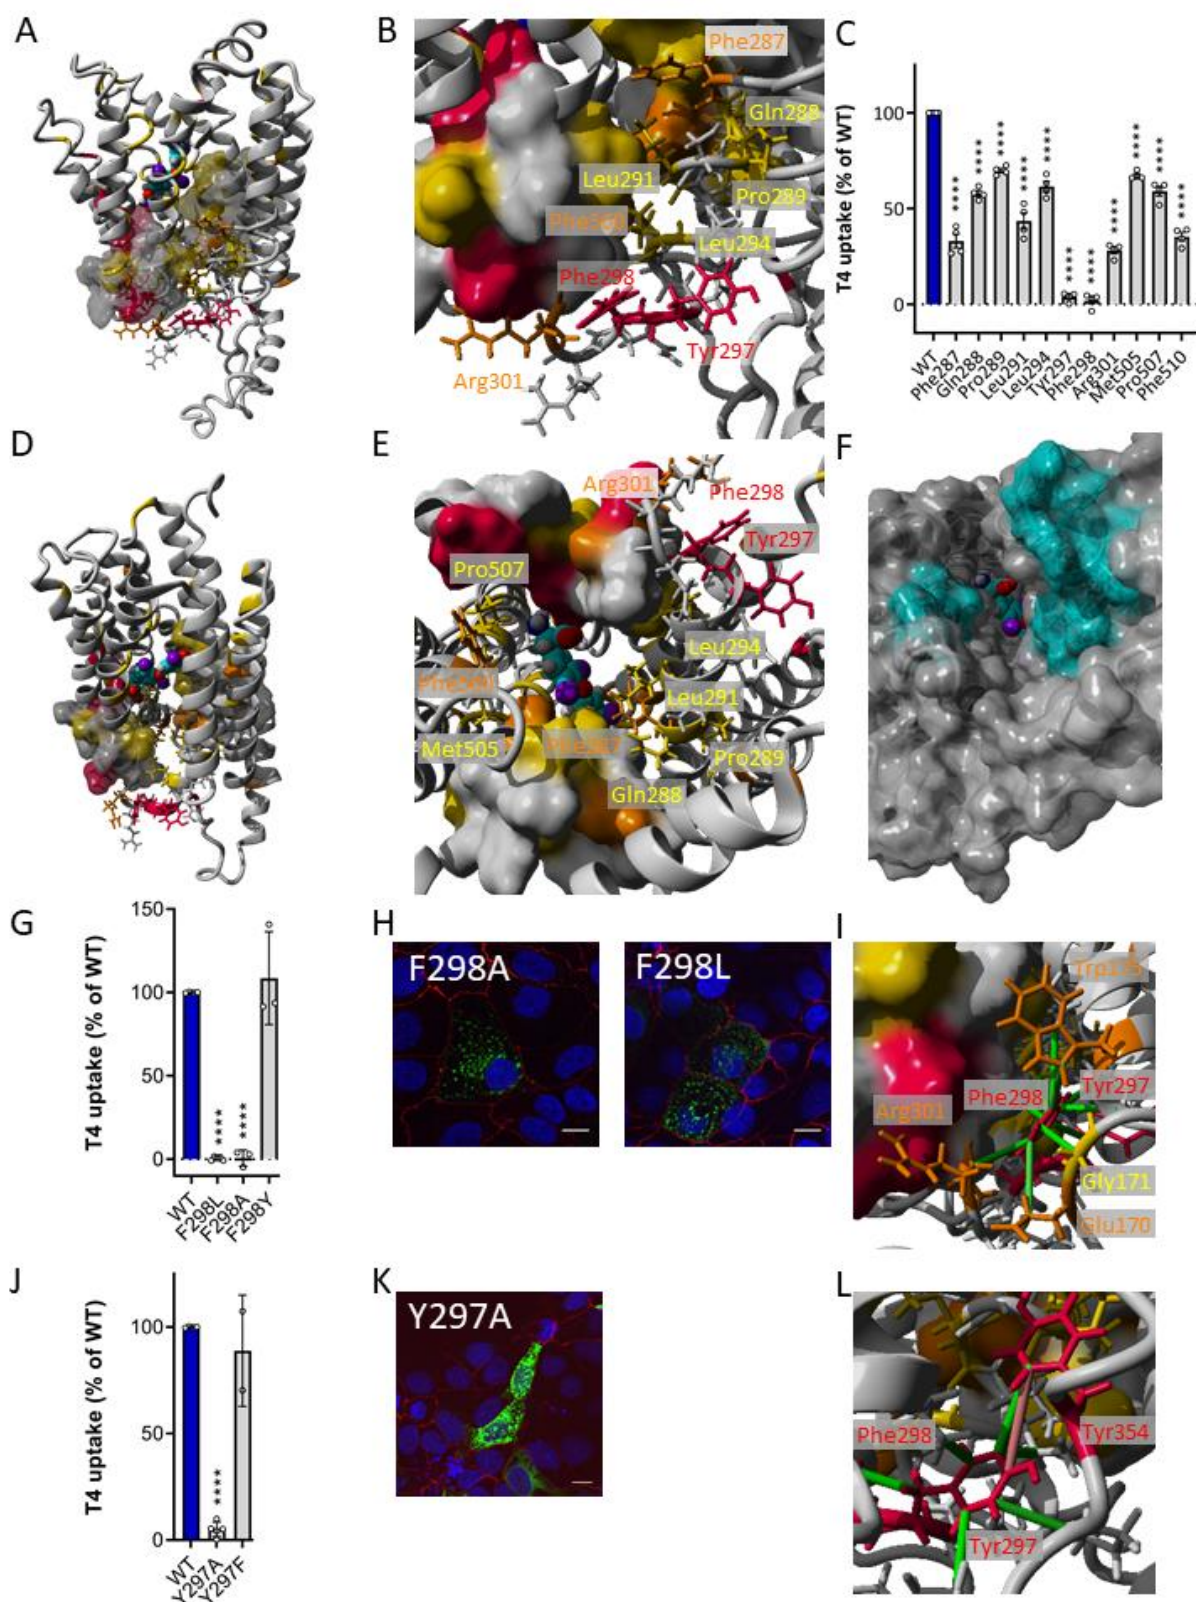

**Supplementary Fig. 24.** Mapping of Ala-screen onto MCT8 homology model – identification of 7 critical regions, including a linker region (group 6). (A) Critical residues in group 6: a linker region composed by the second part of TMD4 and ICL2, connecting cluster 1 and cluster 2, depicted in the MCT8



homology model in outward-open conformation, with a close-up in (B), using the same color-coding as in Supplementary Fig. 18A. (C) T4 transport of WT and indicated mutant MCT8 in transiently transfected JEG-3 cells, expressed relative to WT (set as 100%, mean  $\pm$ s.e.m). P values were calculated using One-way ANOVA with Dunnet post-test, \*\*\*\*  $p < 0.0001$ . (D) The same linker region highlighted in the MCT8 homology model in inward-open conformation, with a close-up from an intracellular view in (E). (F) Substrate channel from an intracellular view with the linker region highlighted in light blue. (G) T4 transport of WT MCT8 and indicated Phe298 variants in transiently transfected JEG-3 cells, expressed relative to WT (set as 100%, mean  $\pm$ s.e.m). P values were calculated using One-way ANOVA with Dunnet post-test, \*\*\*\*  $p < 0.0001$ . (H) Immunocytochemistry of JEG-3 cells transiently expressing indicated variants: DAPI (blue), MCT8 (green), the membrane marker ZO-1 (red). Scale bar indicates 15  $\mu$ m. (I) MCT8 homology model indicating the position of F298 and its interactions with surrounding residues (green sticks represent hydrophobic interactions). (J) T4 transport of WT MCT8 and indicated Y297 variants in transiently transfected JEG-3 cells, expressed relative to WT (set as 100%, mean  $\pm$ s.e.m). P values were calculated using One-way ANOVA with Dunnet post-test, \*\*\*\*  $p < 0.0001$ . (K) Immunocytochemistry of JEG-3 cells transiently expressing Y297A: DAPI (blue), MCT8 (green), the membrane marker ZO-1 (red). Scale bare indicates 15  $\mu$ m. (L) MCT8 homology model indicating the position of Tyr297 and its interactions with surrounding residues (green sticks represent hydrophobic interactions, pink stick represents pi-pi interactions). Dashed lines represent 0% uptake. Source data are provided as a Source Data file.

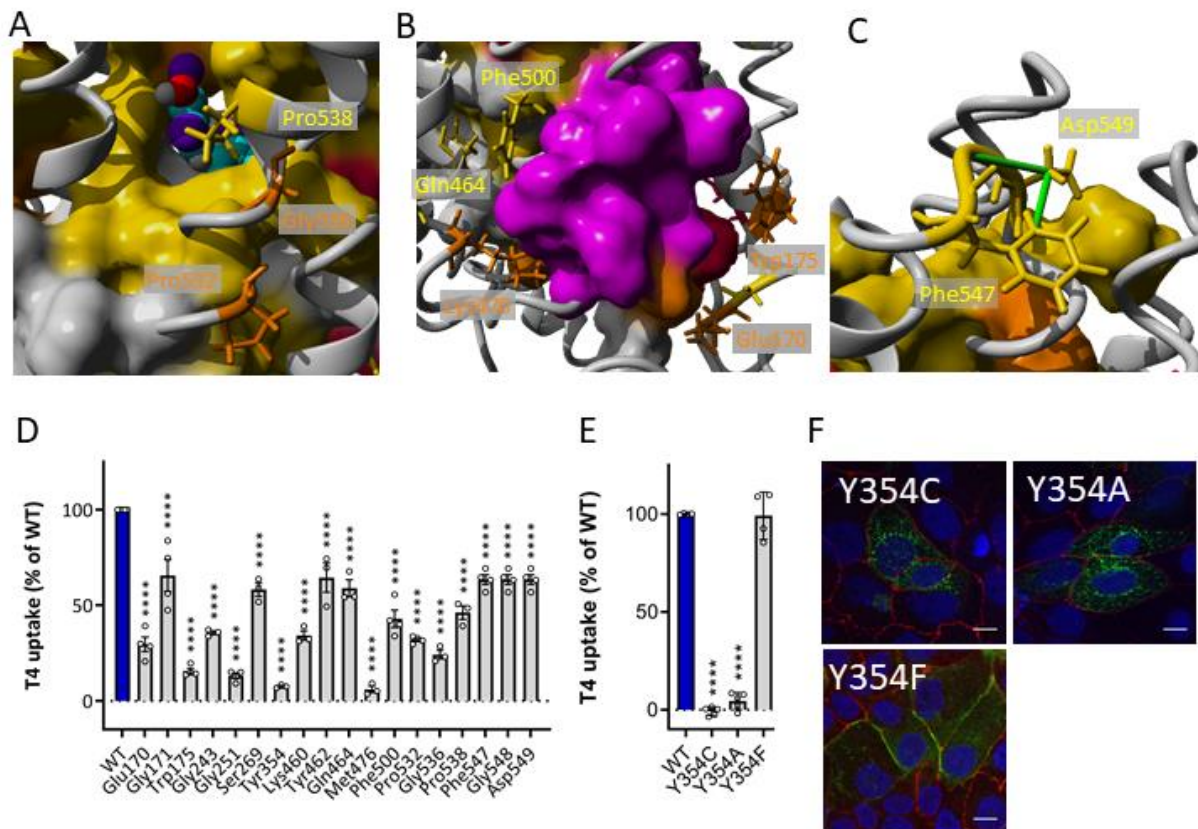

**Supplementary Fig. 25.** Mapping of Ala-screen onto MCT8 homology model – identification of 7 critical regions, including a residual group (group 7). Critical residues in group 7 could not be classified within groups 1-6, but were either structurally important Gly or Pro residues (A), residues that provided structural support to groups 4-6 (B), or putatively involved in stabilization of loop structures (C). Implied residues are shown as sticks with the same color-coding as in Supplementary Fig. 18A. Group 2 residues are shown in yellow (molecular surface) and group 4 residues in magenta. (D) T4 transport of WT and indicated mutant MCT8 in transiently transfected JEG-3 cells, expressed relative to WT (set as 100%, mean  $\pm$  s.e.m). P values were calculated using One-way ANOVA with Dunnet post-test, \*\*\*\* p < 0.0001. (E) T4 transport of WT MCT8 and indicated Tyr354 variants in transiently transfected JEG-3 cells, expressed relative to WT (set as 100%, mean  $\pm$  s.e.m). P values were calculated using One-way ANOVA with Dunnet post-test, \*\*\*\* p < 0.0001. (F) Immunocytochemistry of JEG-3 cells transiently expressing Y354 variants: DAPI (blue), MCT8 (green), the membrane marker ZO-1 (red). Scale bar indicates 15  $\mu$ m. Dashed lines represent 0% uptake. Source data are provided as a Source Data file.

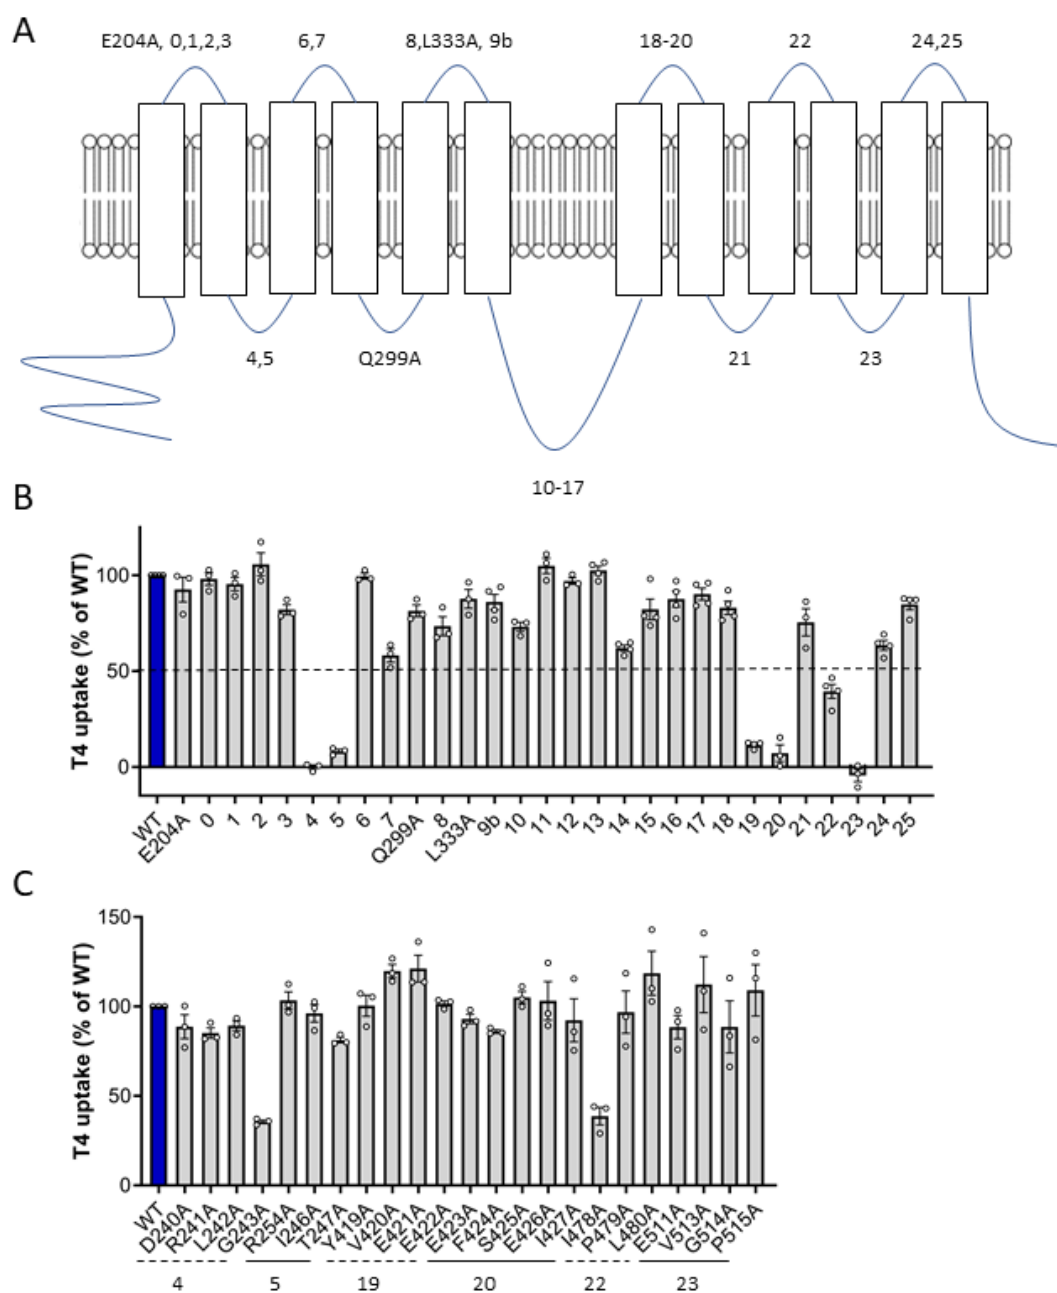

**Supplementary Fig. 26.** Screening of extracellular and intracellular loops. Visualization of functionally evaluated Ala blocks (A), residual uptake capacity of Ala blocks, expressed relatively to WT (100%) (B), and residual uptake capacity of individual Ala variants in Ala blocks with <50% residual uptake capacity (as determined in B), expressed relatively to WT (set as 100%, mean  $\pm$ s.e.m) (C). Source data are provided as a Source Data file.

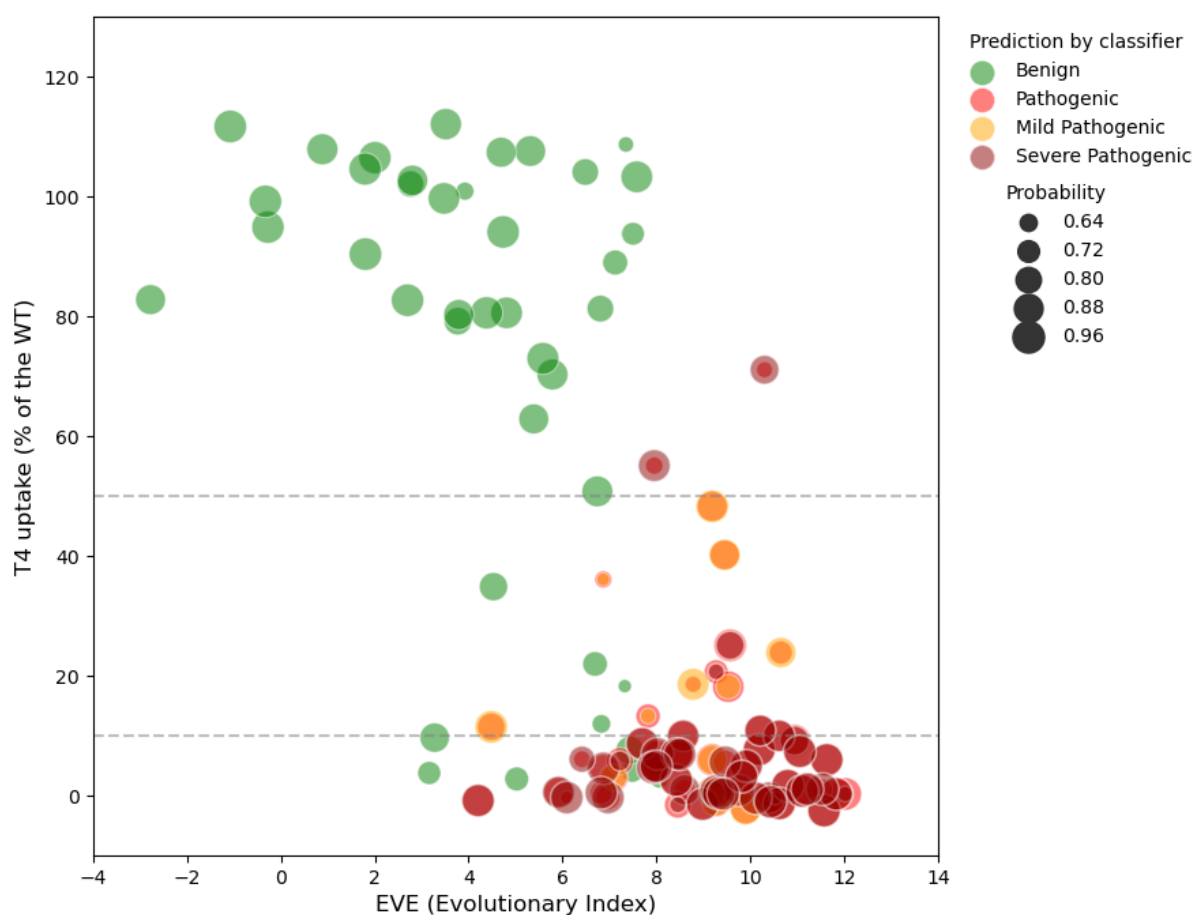

**Supplementary Fig. 27.** Pathogenicity and severity prediction of all functionally evaluated variants identified in patients with MCT8 deficiency as well as known benign variants by the unsupervised approach based on EVE; higher number denotes a stronger evolutionary constraint. Color and size of dots correspond to prediction by the dual pathogenicity-severity classifier. Dashed lines represent cut-off values for different LoF classes. Source data are provided as a Source Data file.

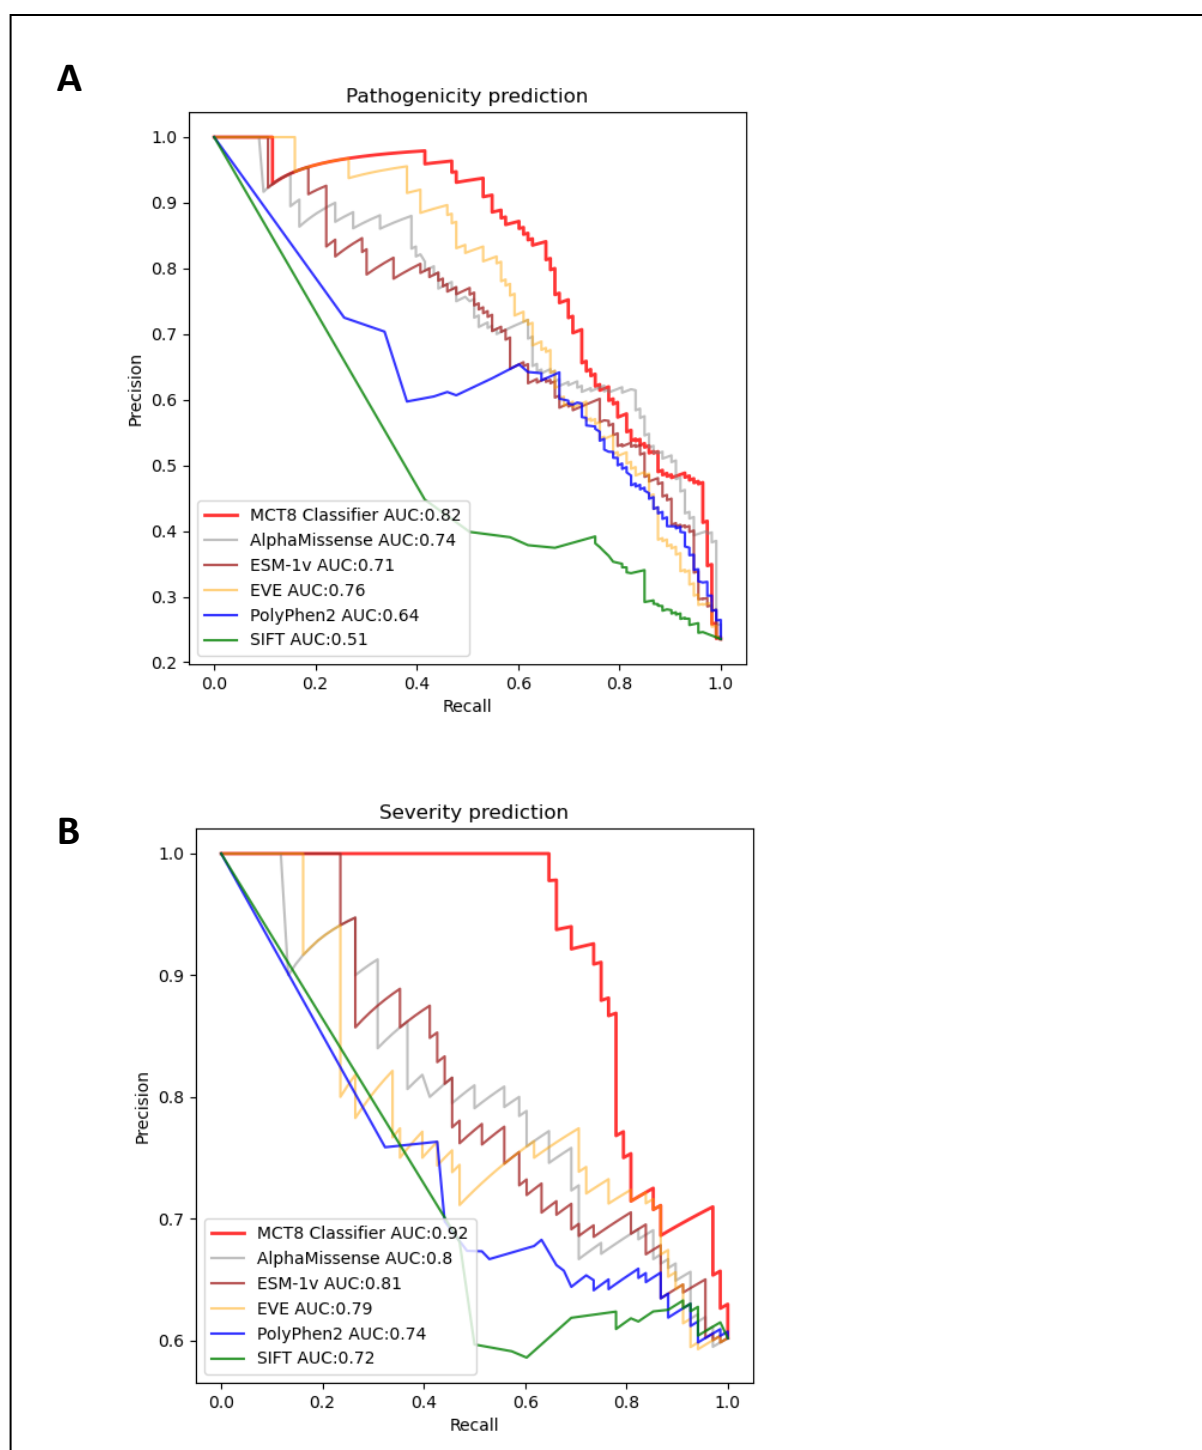

**Supplementary Fig. 28.** Performance of the MCT8 pathogenicity (A) and severity (B) classifier for all functionally evaluated variants as shown by AUPRC curve, with direct comparison to the unsupervised machine learning tool (EVE) and commonly used pathogenicity prediction tools. Source data are provided as a Source Data file.

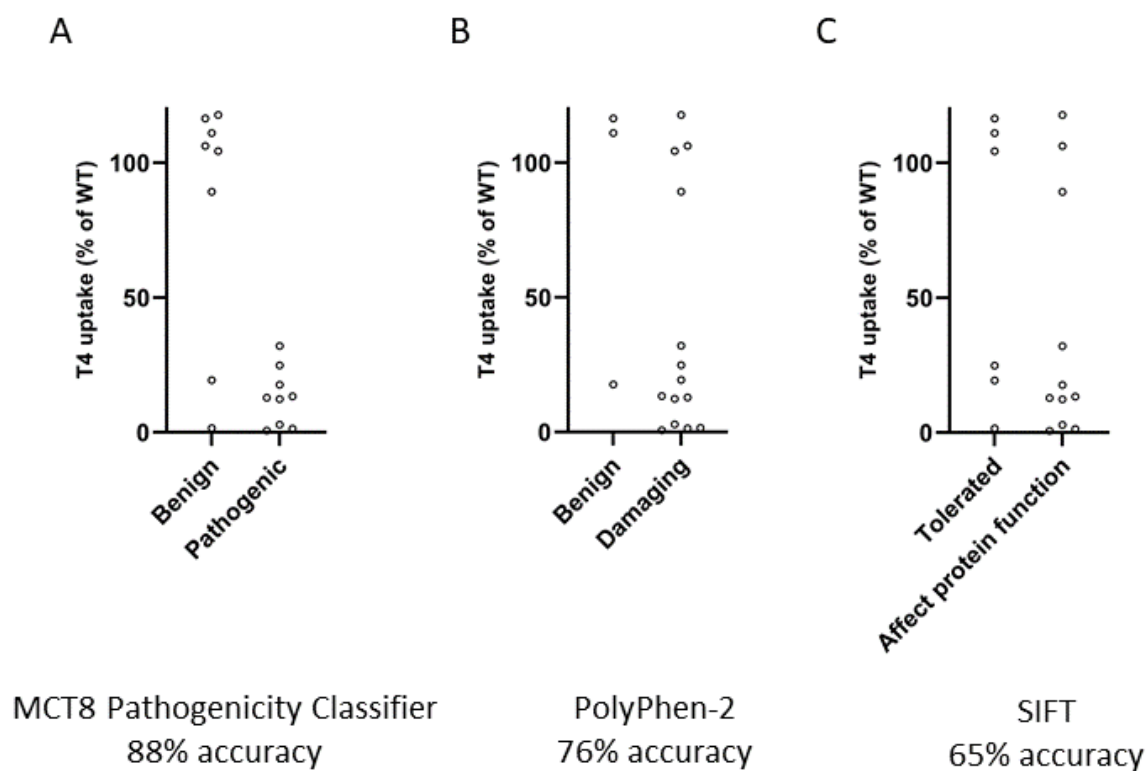

**Supplementary Fig. 29.** Classifier validation experiments compared to currently available prediction tools. Residual uptake capacity of newly identified patient variants and random artificial variants, expressed relatively to WT (100%), categorized by prediction of their pathogenicity by the MCT8 Pathogenicity Classifier (A), PolyPhen-2 (B) and SIFT (C). Source data are provided as a Source Data file.

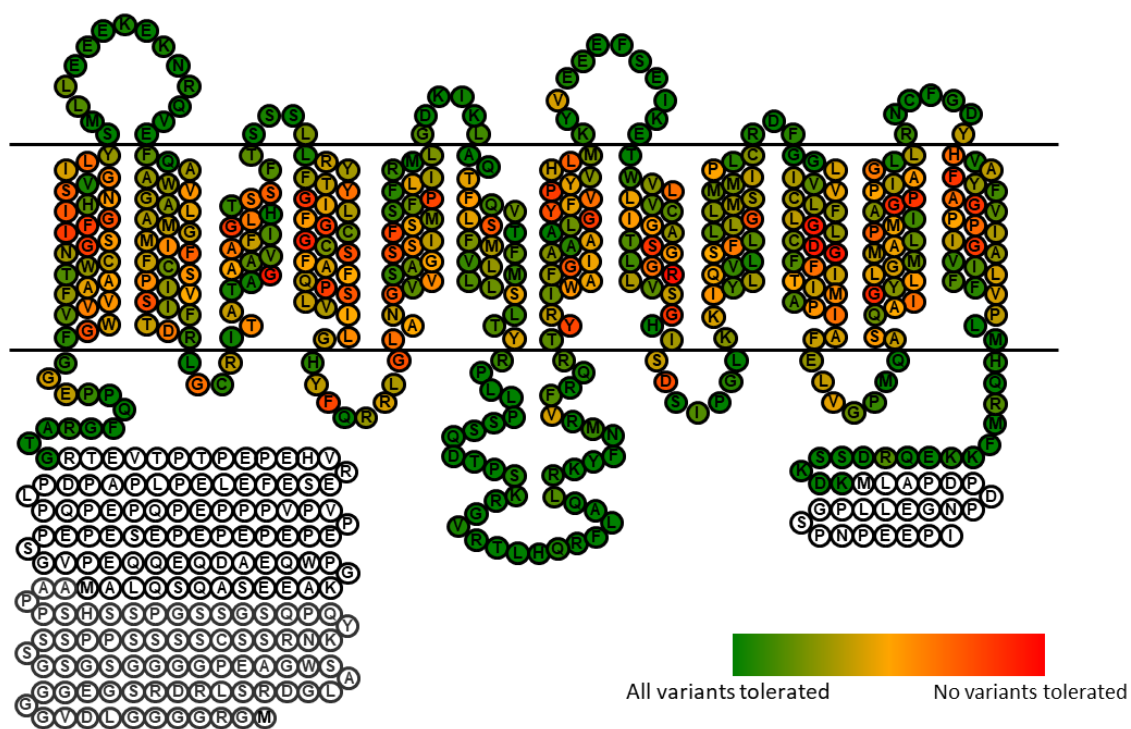

**Supplementary Fig. 30.** 2D structural model of MCT8 with colors indicating predicted overall tolerability of missense variants from amino acid residue G161 to K590.



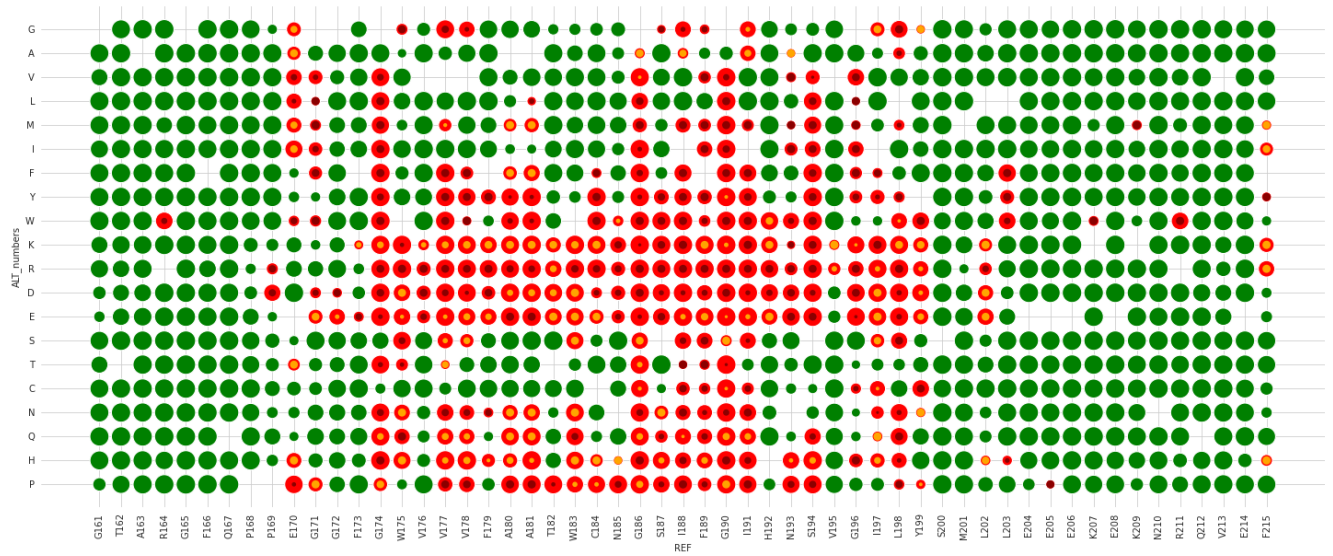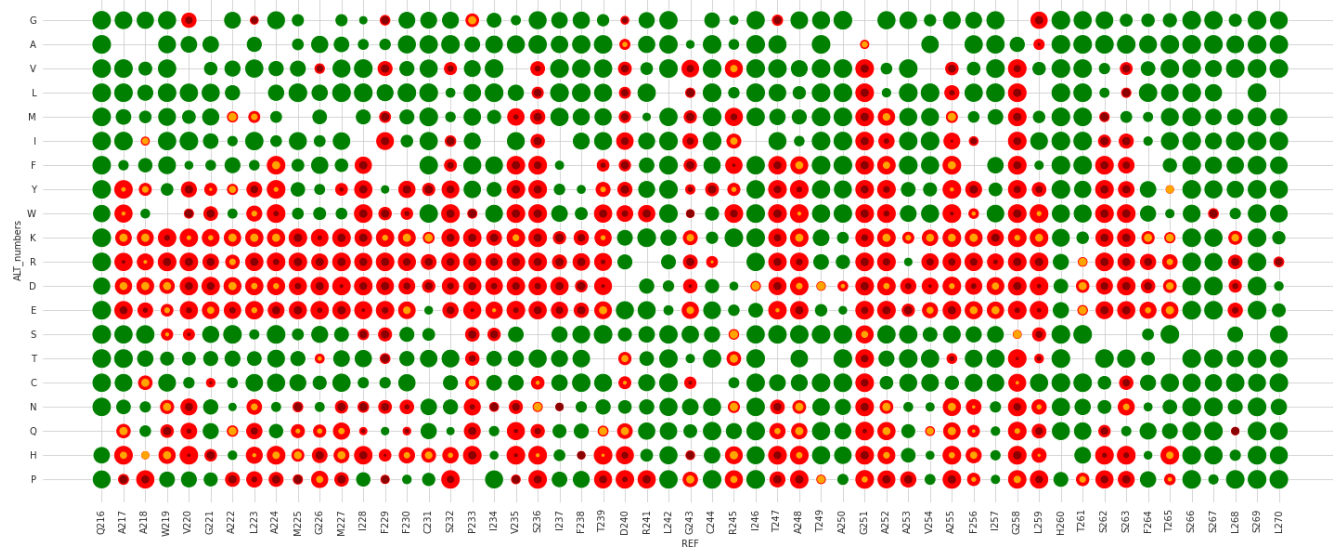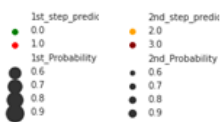

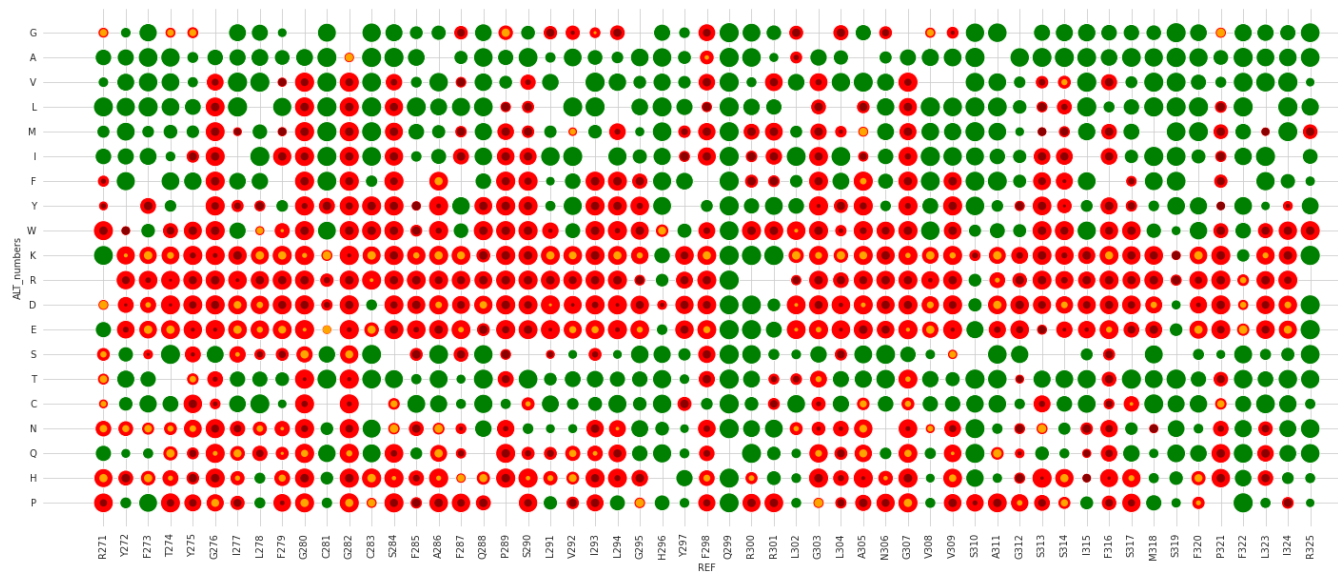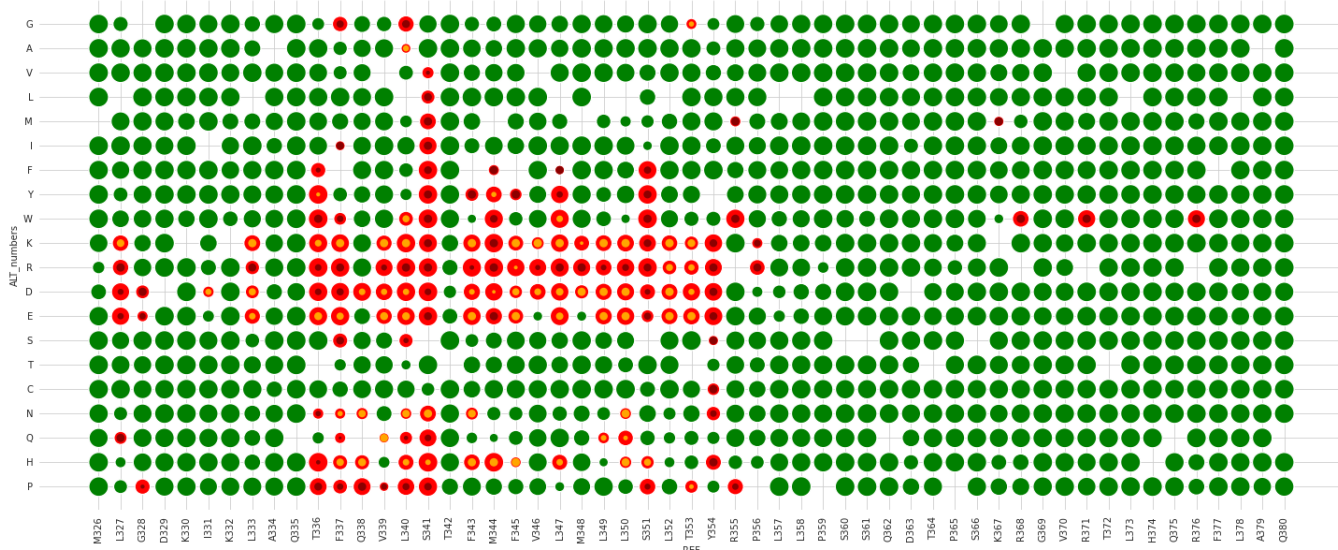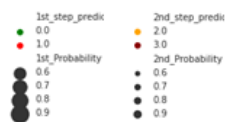

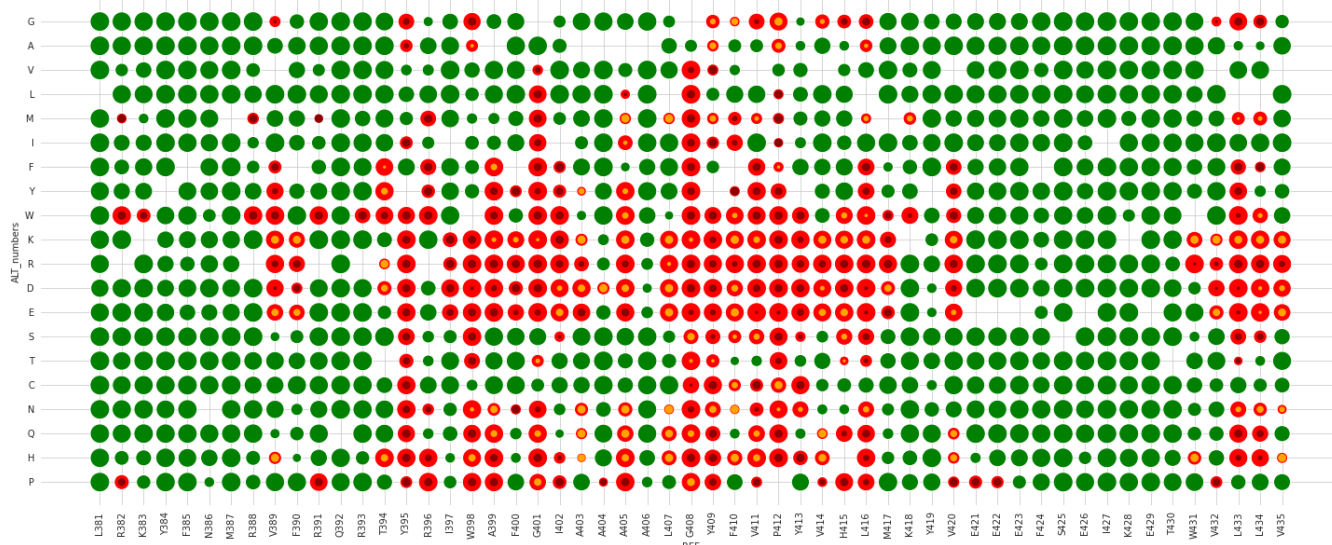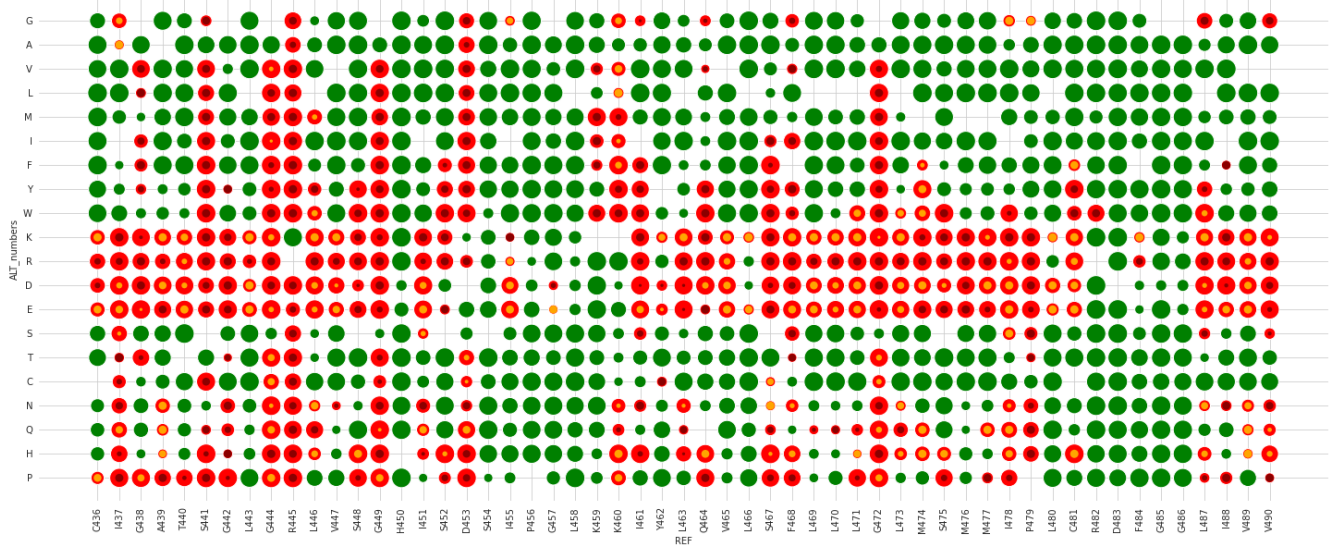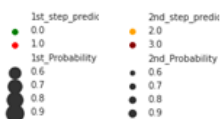



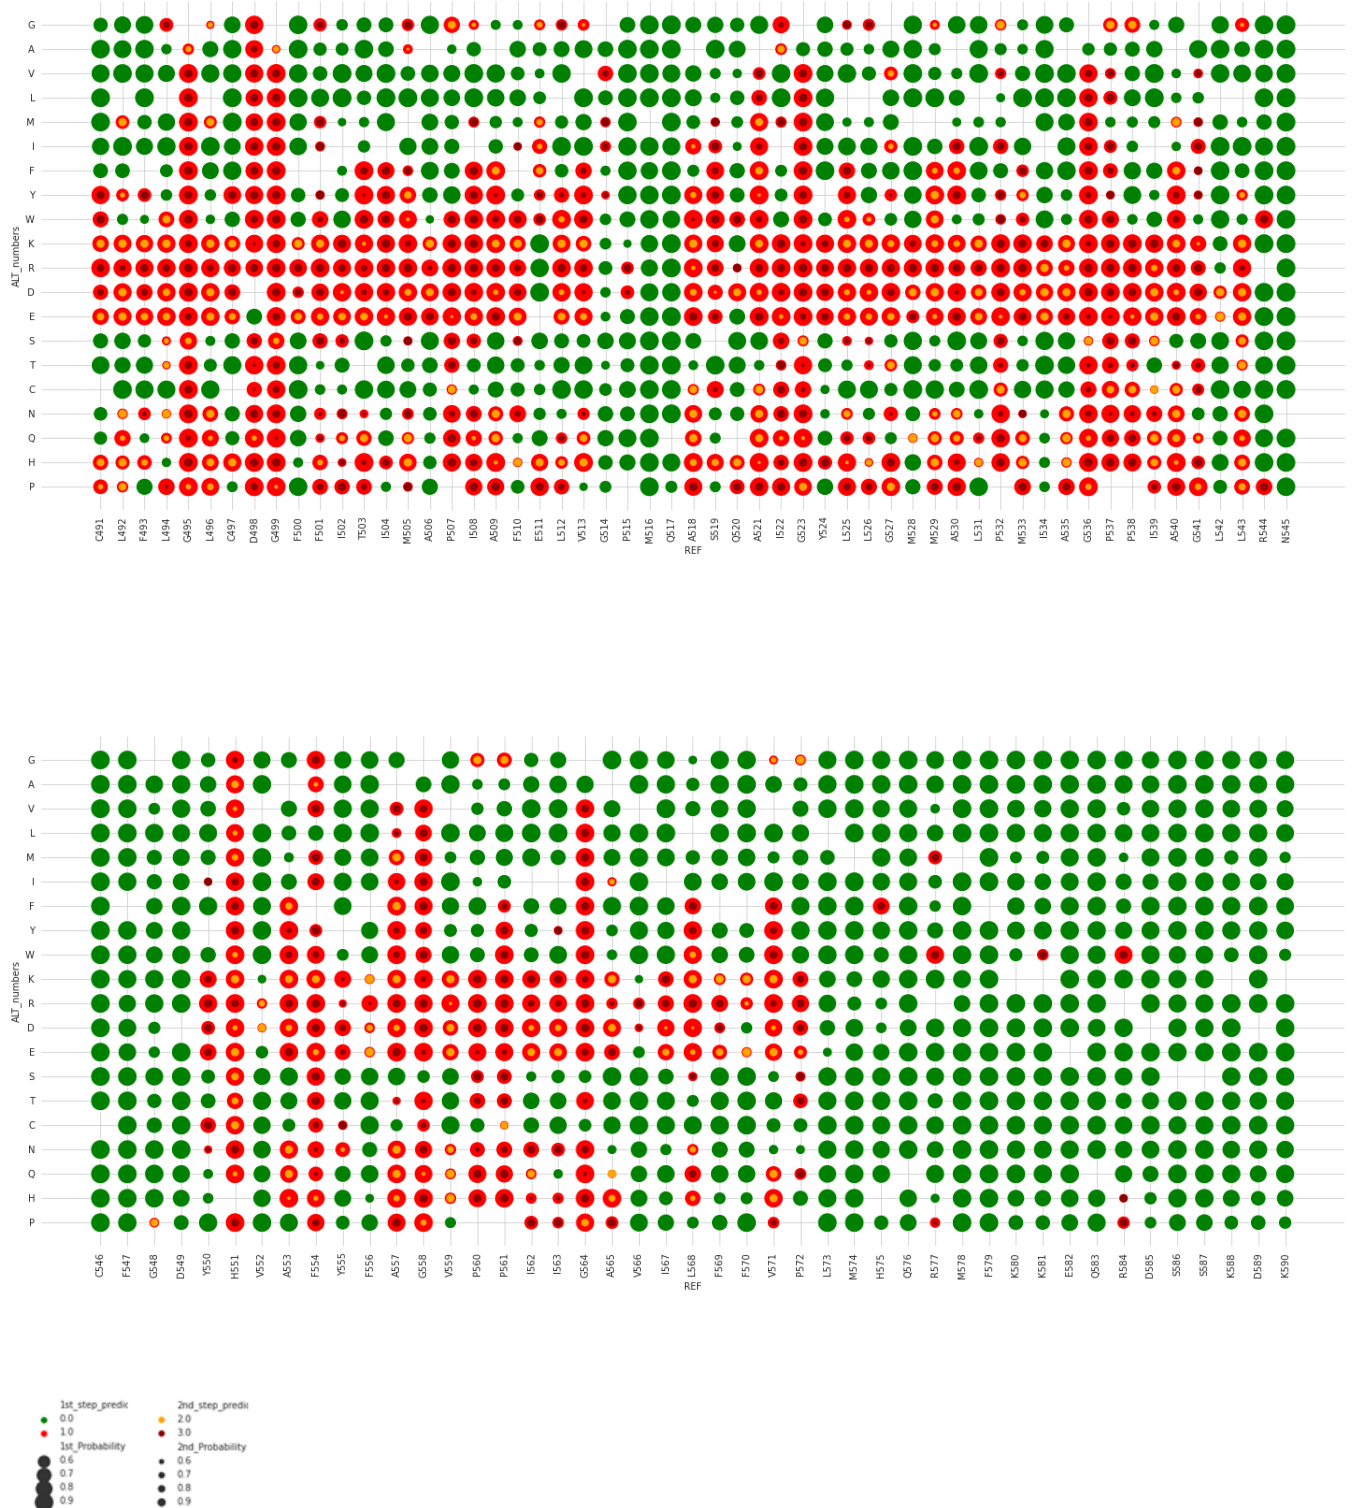

**Supplementary Fig. 31.** Pathogenicity and disease severity prediction (in case of pathogenic prediction) of all potential missense variants in MCT8 from amino acid residue from G161 to K590.

Green: predicted benign; red: predicted pathogenic; yellow in red: predicted mild and moderate LoF;

brown in red: predicted severe LoF; the size of the circle denotes the probability of correct prediction:  
larger circle, higher probability. Source data are provided in Data Source File.

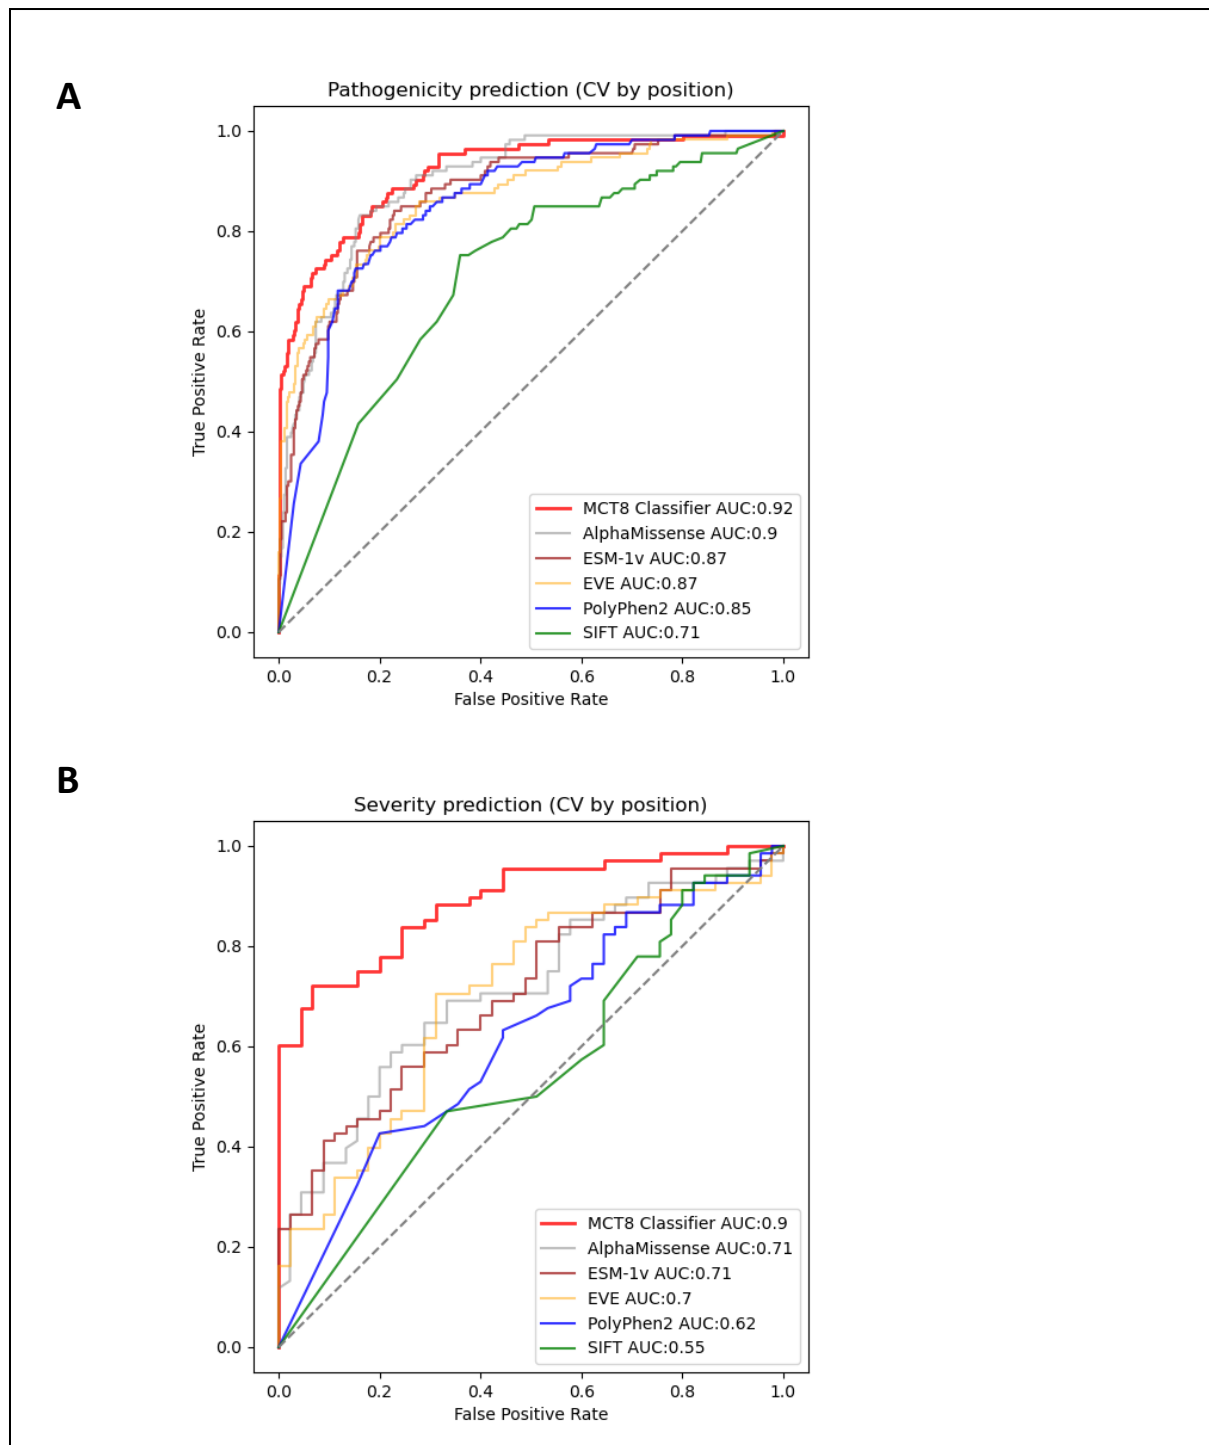

**Supplementary Fig. 32.** Performance of the MCT8 pathogenicity (A) and severity (B) classifier performance of the classifier by 10-fold cross-validation splitting the dataset by positions. Source data are provided as a Source Data file.

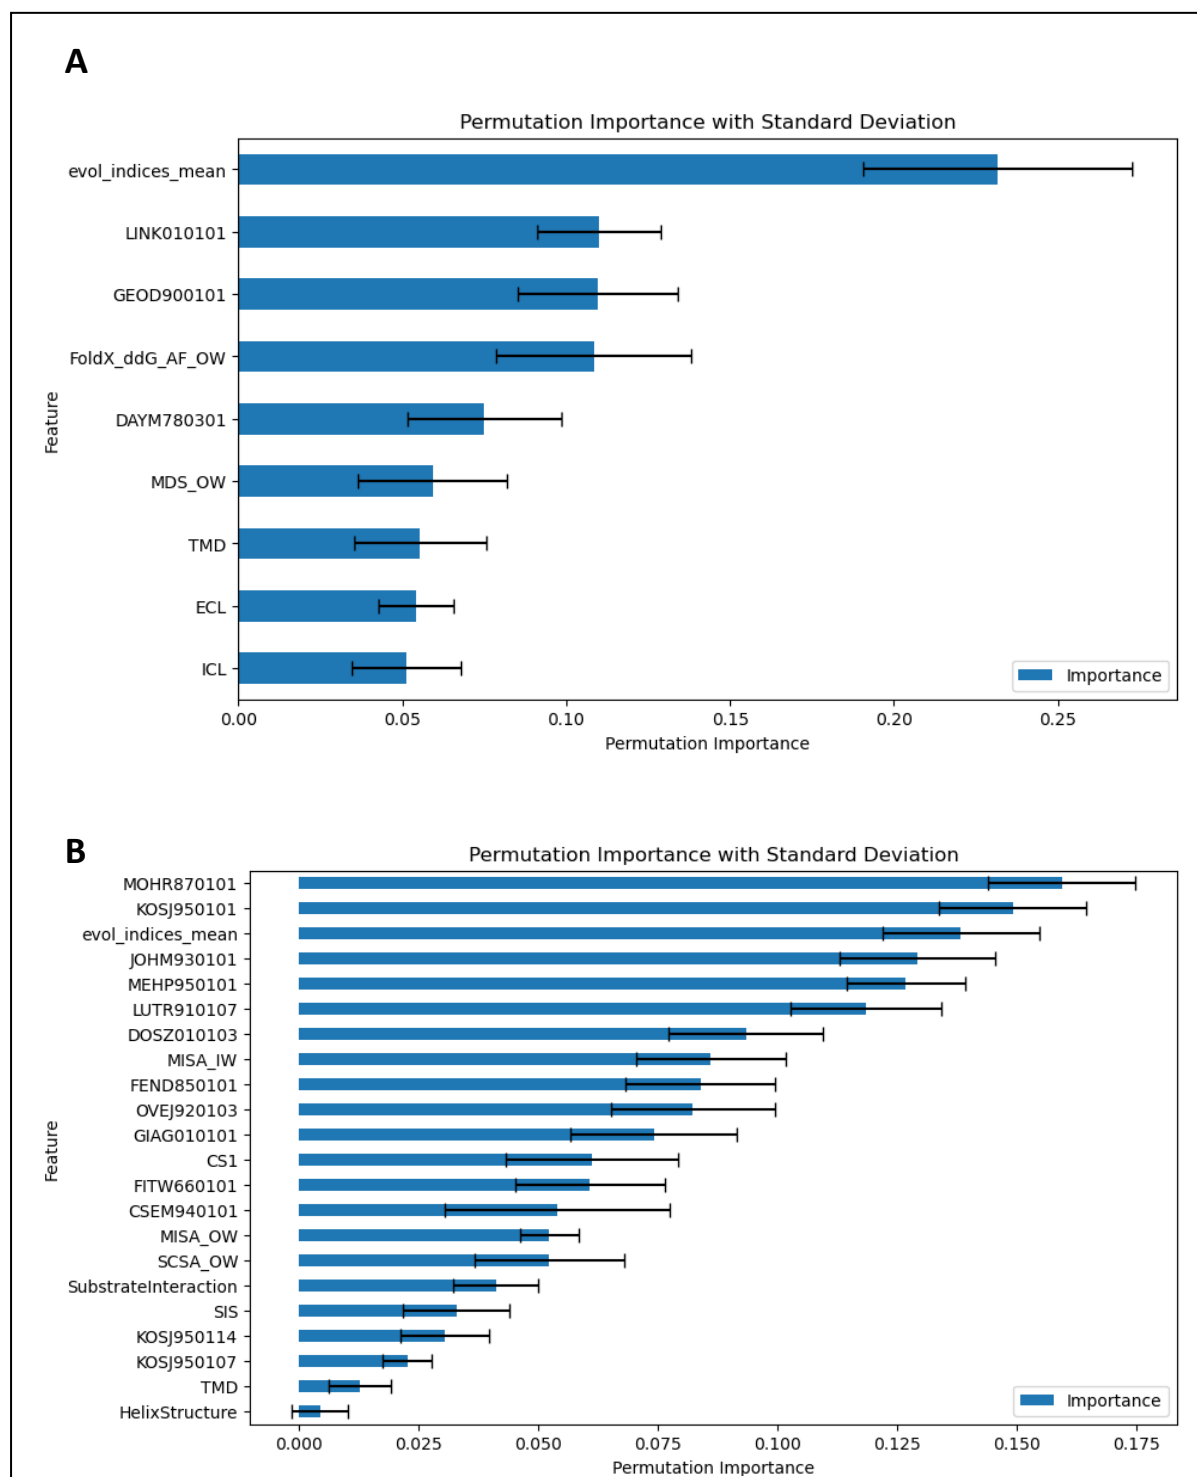

**Supplementary Fig. 33.** Feature relevance of the MCT8 pathogenicity (A) and severity (B) classifier by performing a feature permutation importance inspection. Source data are provided as a Source Data file. Source data are provided as a Source Data file.



## References

1. Li ZL, Buck M. Beyond history and "on a roll": The list of the most well-studied human protein structures and overall trends in the protein data bank. *Protein science : a publication of the Protein Society* **30**, 745-760 (2021).
2. Drew D, North RA, Nagarathinam K, Tanabe M. Structures and General Transport Mechanisms by the Major Facilitator Superfamily (MFS). *Chem Rev* **121**, 5289-5335 (2021).
3. Groeneweg S, Lima de Souza EC, Meima ME, Peeters RP, Visser WE, Visser TJ. Outward-Open Model of Thyroid Hormone Transporter Monocarboxylate Transporter 8 Provides Novel Structural and Functional Insights. *Endocrinology* **158**, 3292-3306 (2017).
4. Groeneweg S, Lima de Souza EC, Visser WE, Peeters RP, Visser TJ. Importance of His192 in the human thyroid hormone transporter MCT8 for substrate recognition. *Endocrinology* **154**, 2525-2532 (2013).
5. Lima de Souza EC, Groeneweg S, Visser WE, Peeters RP, Visser TJ. Importance of cysteine residues in the thyroid hormone transporter MCT8. *Endocrinology* **154**, 1948-1955 (2013).
6. Wilson MC, Meredith D, Bunnun C, Sessions RB, Halestrap AP. Studies on the DIDS-binding site of monocarboxylate transporter 1 suggest a homology model of the open conformation and a plausible translocation cycle. *J Biol Chem* **284**, 20011-20021 (2009).
7. Rahman B, Schneider HP, Broer A, Deitmer JW, Broer S. Helix 8 and helix 10 are involved in substrate recognition in the rat monocarboxylate transporter MCT1. *Biochemistry* **38**, 11577-11584 (1999).
8. Ueda S, *et al.* Differences in response of thyrotropin to 3,5,3'-triiodothyronine and 3,5,3'-triiodothyroacetic acid in patients with resistance to thyroid hormone. *Thyroid* **6**, 563-570 (1996).
9. Wejaphikul K, *et al.* Insight Into Molecular Determinants of T3 vs T4 Recognition From Mutations in Thyroid Hormone Receptor alpha and beta. *J Clin Endocrinol Metab* **104**, 3491-3500 (2019).
10. Wejaphikul K, *et al.* Role of leucine 341 in thyroid hormone receptor beta revealed by a novel mutation causing thyroid hormone resistance. *Thyroid*, (2018).
11. Jumper J, *et al.* Highly accurate protein structure prediction with AlphaFold. *Nature* **596**, 583-589 (2021).

12. van Geest FS, *et al.* Clinical and Functional Consequences of C-Terminal Variants in MCT8: A Case Series. *J Clin Endocrinol Metab* **106**, 539-553 (2021).
13. Groeneweg S, van den Berge A, Lima de Souza EC, Meima ME, Peeters RP, Visser WE. Insights Into the Mechanism of MCT8 Oligomerization. *J Endocr Soc* **4**, bvaa080 (2020).
14. Zhang XC, Zhao Y, Heng J, Jiang D. Energy coupling mechanisms of MFS transporters. *Protein science : a publication of the Protein Society* **24**, 1560-1579 (2015).
15. Wang N, *et al.* Structural basis of human monocarboxylate transporter 1 inhibition by anti-cancer drug candidates. *Cell* **184**, 370-383 e313 (2021).
16. Groeneweg S, *et al.* The role of Arg445 and Asp498 in the human thyroid hormone transporter MCT8. *Endocrinology* **155**, 618-626 (2014).
17. Kinne A, *et al.* Essential molecular determinants for thyroid hormone transport and first structural implications for monocarboxylate transporter 8. *J Biol Chem* **285**, 28054-28063 (2010).
18. Protze J, Braun D, Hinz KM, Bayer-Kusch D, Schweizer U, Krause G. Membrane-traversing mechanism of thyroid hormone transport by monocarboxylate transporter 8. *Cell Mol Life Sci* **74**, 2299-2318 (2017).
19. van Hasselt PM, Ferdinandusse S, van Haaften G. Monocarboxylate transporter 1 deficiency and ketone utilization. *N Engl J Med* **372**, 578-579 (2015).
20. Moradi M, Enkavi G, Tajkhorshid E. Atomic-level characterization of transport cycle thermodynamics in the glycerol-3-phosphate:phosphate antiporter. *Nat Commun* **6**, 8393 (2015).
21. Law CJ, *et al.* Salt-bridge dynamics control substrate-induced conformational change in the membrane transporter GlpT. *Journal of molecular biology* **378**, 828-839 (2008).
22. Dang S, *et al.* Structure of a fucose transporter in an outward-open conformation. *Nature* **467**, 734-738 (2010).
23. Zimmermann MO, Lange A, Zahn S, Exner TE, Boeckler FM. Using Surface Scans for the Evaluation of Halogen Bonds toward the Side Chains of Aspartate, Asparagine, Glutamate, and Glutamine. *Journal of chemical information and modeling* **56**, 1373-1383 (2016).
24. Johannes J, Braun D, Kinne A, Rathmann D, Kohrle J, Schweizer U. Few Amino Acid Exchanges Expand the Substrate Spectrum of Monocarboxylate Transporter 10. *Mol Endocrinol* **30**, 796-808 (2016).

25. Groeneweg S, *et al.* Disease characteristics of MCT8 deficiency: an international, retrospective, multicentre cohort study. *Lancet Diabetes Endocrinol* **8**, 594-605 (2020).
26. Karczewski KJ, *et al.* The mutational constraint spectrum quantified from variation in 141,456 humans. *Nature* **581**, 434-443 (2020).
27. RRID:AB\_1079343, [https://scicrunch.org/resolver/AB\\_1079343](https://scicrunch.org/resolver/AB_1079343).
28. RRID:AB\_2107445, [https://scicrunch.org/resolver/AB\\_2107445](https://scicrunch.org/resolver/AB_2107445).
29. RRID:AB\_2533147, [https://scicrunch.org/resolver/AB\\_2533147](https://scicrunch.org/resolver/AB_2533147).
30. RRID:AB\_621843, [https://scicrunch.org/resolver/AB\\_621843](https://scicrunch.org/resolver/AB_621843).
31. RRID:AB\_10706161, [https://scicrunch.org/resolver/AB\\_10706161](https://scicrunch.org/resolver/AB_10706161).
32. RRID:AB\_143165, [https://scicrunch.org/resolver/AB\\_143165](https://scicrunch.org/resolver/AB_143165).
33. RRID:AB\_2535718, [https://scicrunch.org/resolver/AB\\_2535718](https://scicrunch.org/resolver/AB_2535718).
34. Groeneweg S, *et al.* Effectiveness and safety of the tri-iodothyronine analogue Triac in children and adults with MCT8 deficiency: an international, single-arm, open-label, phase 2 trial. *Lancet Diabetes Endocrinol* **7**, 695-706 (2019).
35. van Geest FS, *et al.* Long-Term Efficacy of T3 Analogue Triac in Children and Adults With MCT8 Deficiency: A Real-Life Retrospective Cohort Study. *J Clin Endocrinol Metab* **107**, e1136-e1147 (2022).
36. <https://www.mapchart.net/>).
37. <https://www.prb.org/international/indicator/population/snapshot/>).
38. van Hasselt PM, *et al.* Monocarboxylate transporter 1 deficiency and ketone utilization. *N Engl J Med* **371**, 1900-1907 (2014).
39. Zhang B, *et al.* Cooperative transport mechanism of human monocarboxylate transporter 2. *Nat Commun* **11**, 2429 (2020).

40. Sasaki S, *et al.* Crucial residue involved in L-lactate recognition by human monocarboxylate transporter 4 (hMCT4). *PLoS One* **8**, e67690 (2013).
41. Dhayat N, *et al.* Mutation in the Monocarboxylate Transporter 12 Gene Affects Guanidinoacetate Excretion but Does Not Cause Glucosuria. *J Am Soc Nephrol* **27**, 1426-1436 (2016).
42. Staubli A, *et al.* Abnormal creatine transport of mutations in monocarboxylate transporter 12 (MCT12) found in patients with age-related cataract can be partially rescued by exogenous chaperone CD147. *Hum Mol Genet* **26**, 4203-4214 (2017).
43. Nancolas B, Sessions RB, Halestrap AP. Identification of key binding site residues of MCT1 for AR-C155858 reveals the molecular basis of its isoform selectivity. *Biochem J* **466**, 177-188 (2015).
44. Merezhinskaya N, Fishbein WN, Davis JJ, Foellmer JW. Mutations in MCT1 cDNA in patients with symptomatic deficiency in lactate transport. *Muscle Nerve* **23**, 90-97 (2000).
45. Krieger E, Vriend G. New ways to boost molecular dynamics simulations. *J Comput Chem* **36**, 996-1007 (2015).

**Original full immunoblots**

**Original full (uncropped) immunoblots**



Series 1

Total lysate

Anti-MCT8

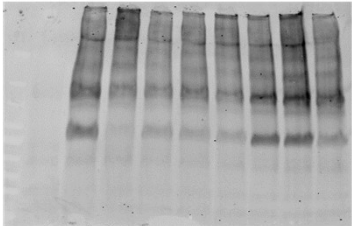

Anti-GAPDH

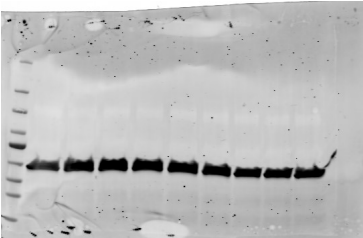

Anti-MCT8

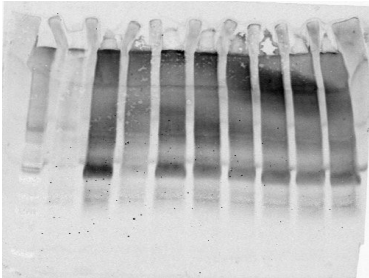

Anti-GAPDH

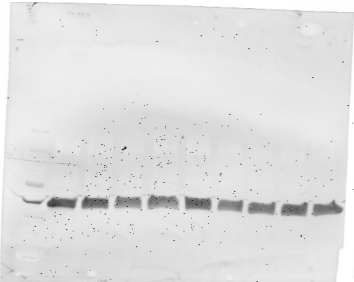

Anti-MCT8

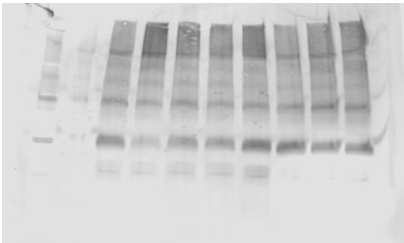

Anti-GAPDH

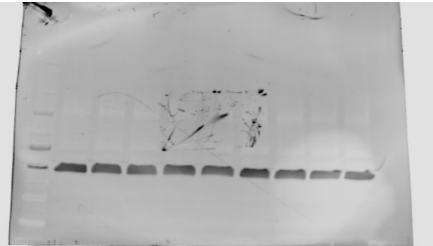

EV  
WT  
I188N  
H192R  
H192P  
S194F  
G196V  
G196E  
L203P

EV  
WT  
I188N  
H192R  
H192P  
S194F  
G196V  
G196E  
L203P

Surface

Anti-MCT8

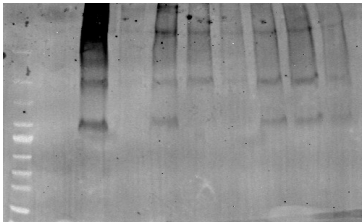

Anti-GAPDH

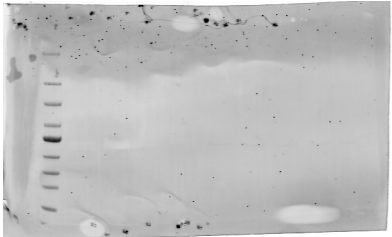

Anti-MCT8

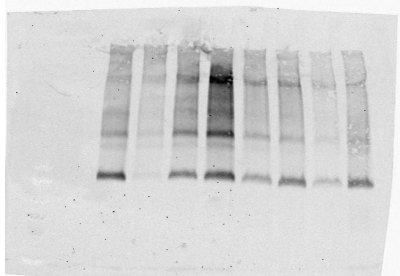

Anti-GAPDH

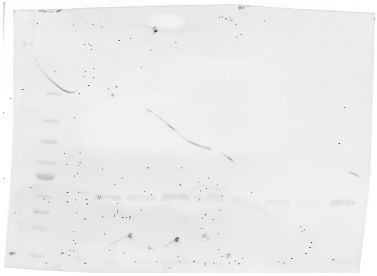

Anti-MCT8

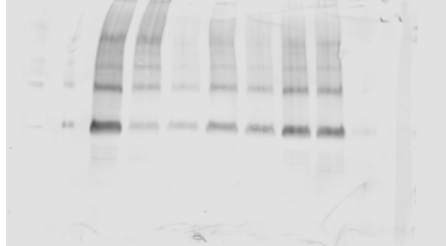

Anti-GAPDH

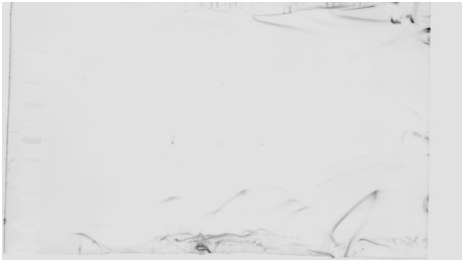

EV  
WT  
I188N  
H192R  
H192P  
S194F  
G196V  
G196E  
L203P

EV  
WT  
I188N  
H192R  
H192P  
S194F  
G196V  
G196E  
L203P

Series 2

Total lysate

Anti-MCT8

Anti-GAPDH

N=1

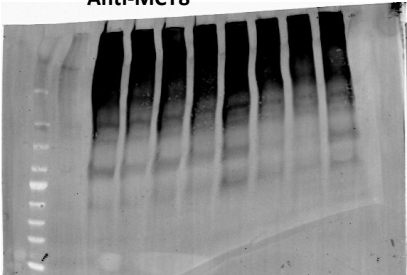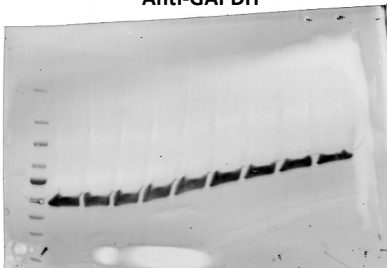

Anti-MCT8

Anti-GAPDH

N=2

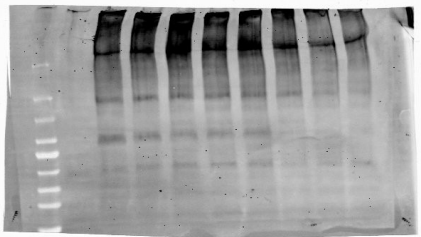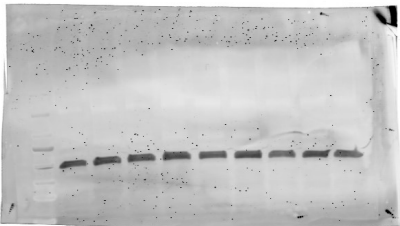

Anti-MCT8

Anti-GAPDH

N=3

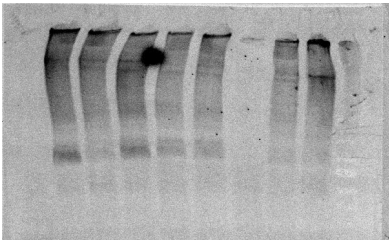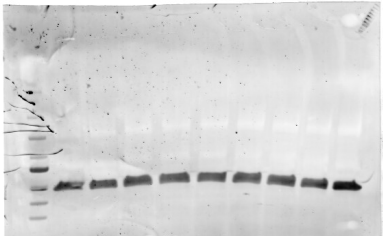

EV WT G221R A224T A224V A224E M227R F230del V235M

EV WT G221R A224T A224V A224E M227R F230del V235M

Surface

Anti-MCT8

Anti-GAPDH

N=1

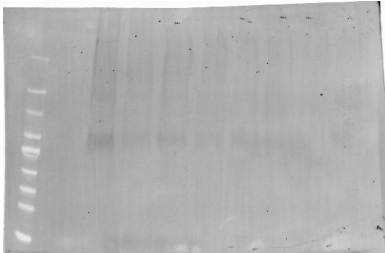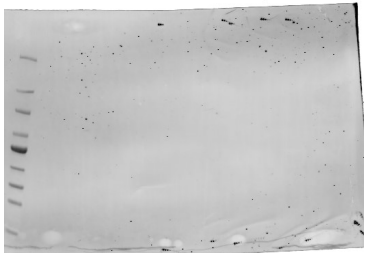

Anti-MCT8

Anti-GAPDH

N=2

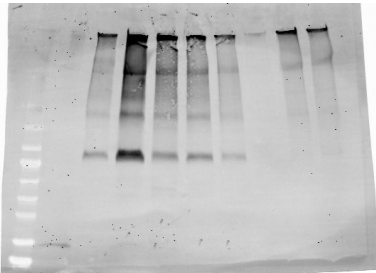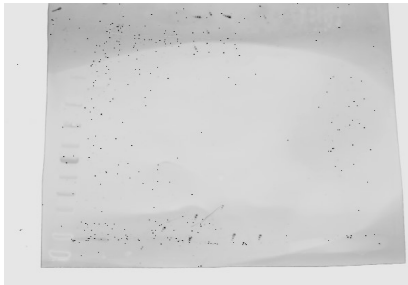

Anti-MCT8

Anti-GAPDH

N=3

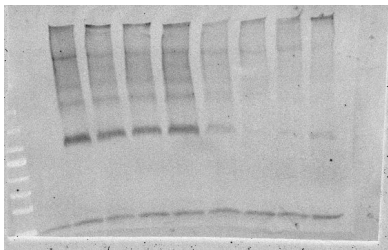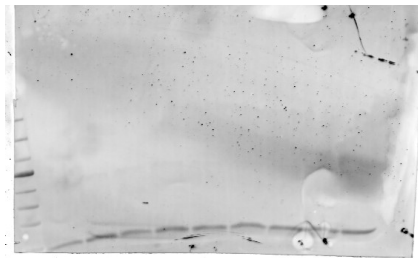

EV WT G221R A224T A224V A224E M227R F230del V235M

EV WT G221R A224T A224V A224E M227R F230del V235M

Series 3

Total lysate

Anti-MCT8

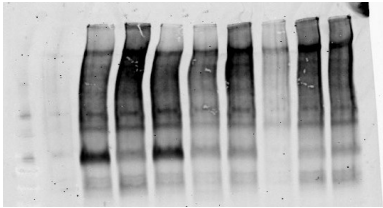

Anti-GAPDH

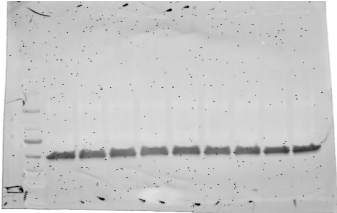

Anti-MCT8

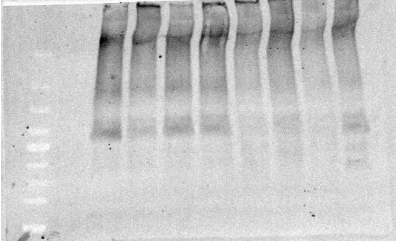

Anti-GAPDH

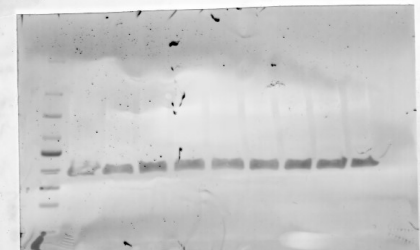

Anti-MCT8

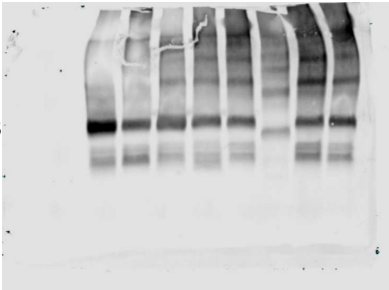

Anti-GAPDH

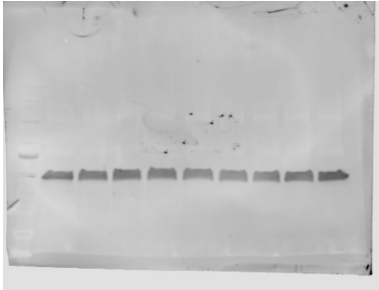

EV  
WT  
T239P  
R271H  
G276R  
G282C  
G282D  
P289L  
S290F

EV  
WT  
T239P  
R271H  
G276R  
G282C  
G282D  
P289L  
S290F

Surface

Anti-MCT8

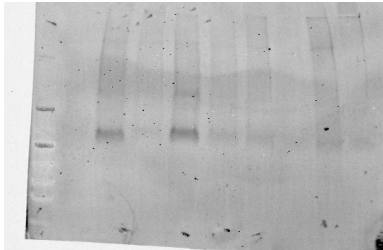

Anti-GAPDH

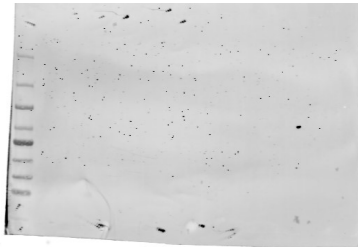

Anti-MCT8

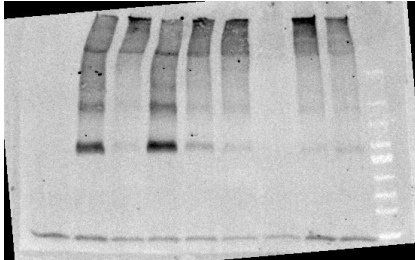

Anti-GAPDH

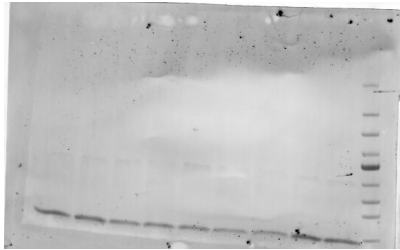

Anti-MCT8

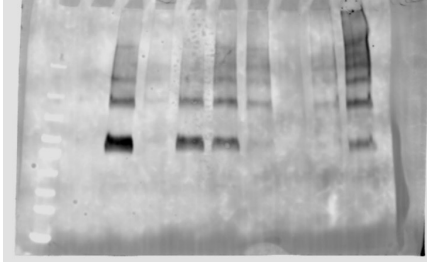

Anti-GAPDH

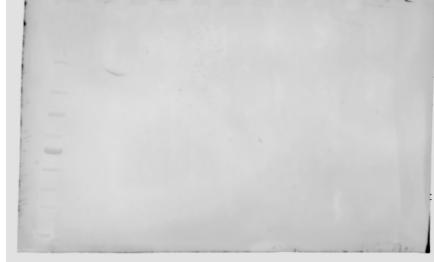

EV  
WT  
T239P  
R271H  
G276R  
G282C  
G282D  
P289L  
S290F

EV  
WT  
T239P  
R271H  
G276R  
G282C  
G282D  
P289L  
S290F

Series 4

Total lysate

Anti-MCT8

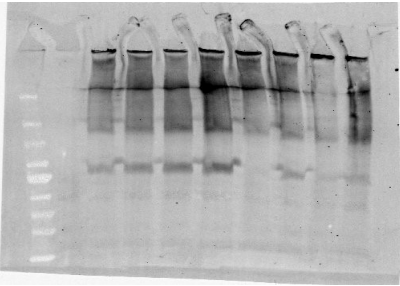

Anti-GAPDH

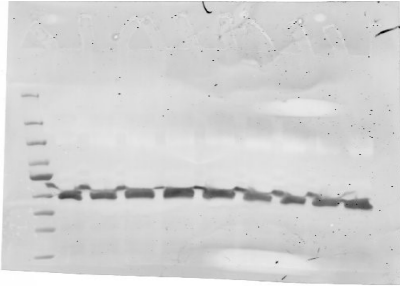

Anti-MCT8

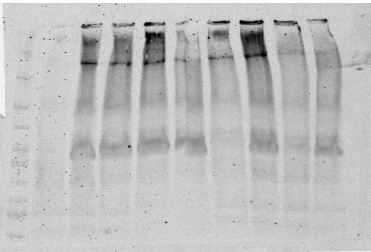

Anti-GAPDH

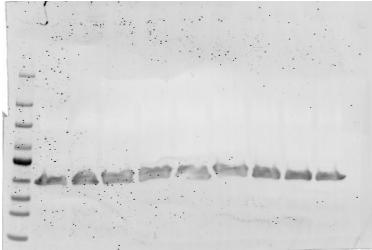

Anti-MCT8

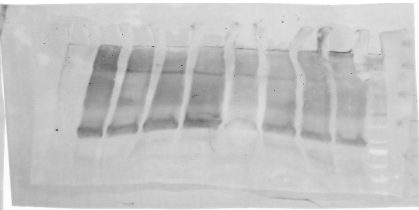

Anti-GAPDH

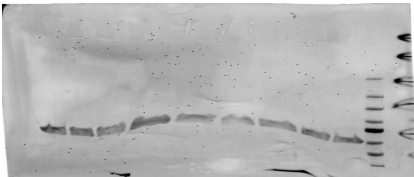

EV  
WT  
L291R  
G295R  
G295S  
F298L  
G303S  
L304P  
G307C

EV  
WT  
L291R  
G295R  
G295S  
F298L  
G303S  
L304P  
G307C

Surface

Anti-MCT8

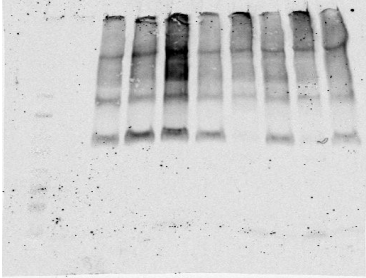

Anti-GAPDH

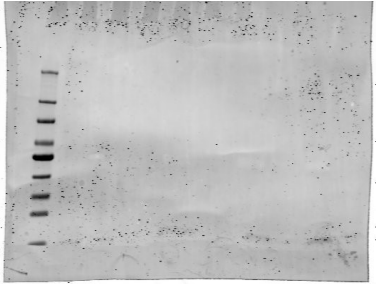

Anti-MCT8

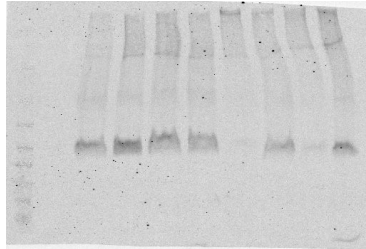

Anti-GAPDH

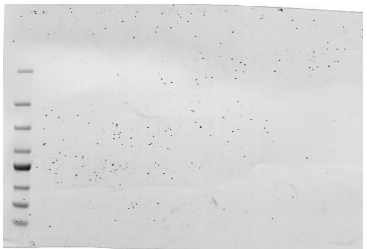

Anti-MCT8

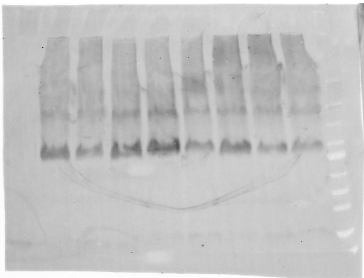

Anti-GAPDH

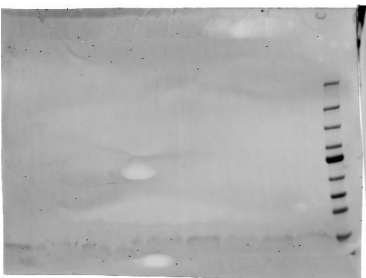

EV  
WT  
L291R  
G295R  
G295S  
F298L  
G303S  
L304P  
G307C

EV  
WT  
L291R  
G295R  
G295S  
F298L  
G303S  
L304P  
G307C

Series 5

Total lysate

Surface

N=1

N=1

N=2

N=2

N=3

N=3

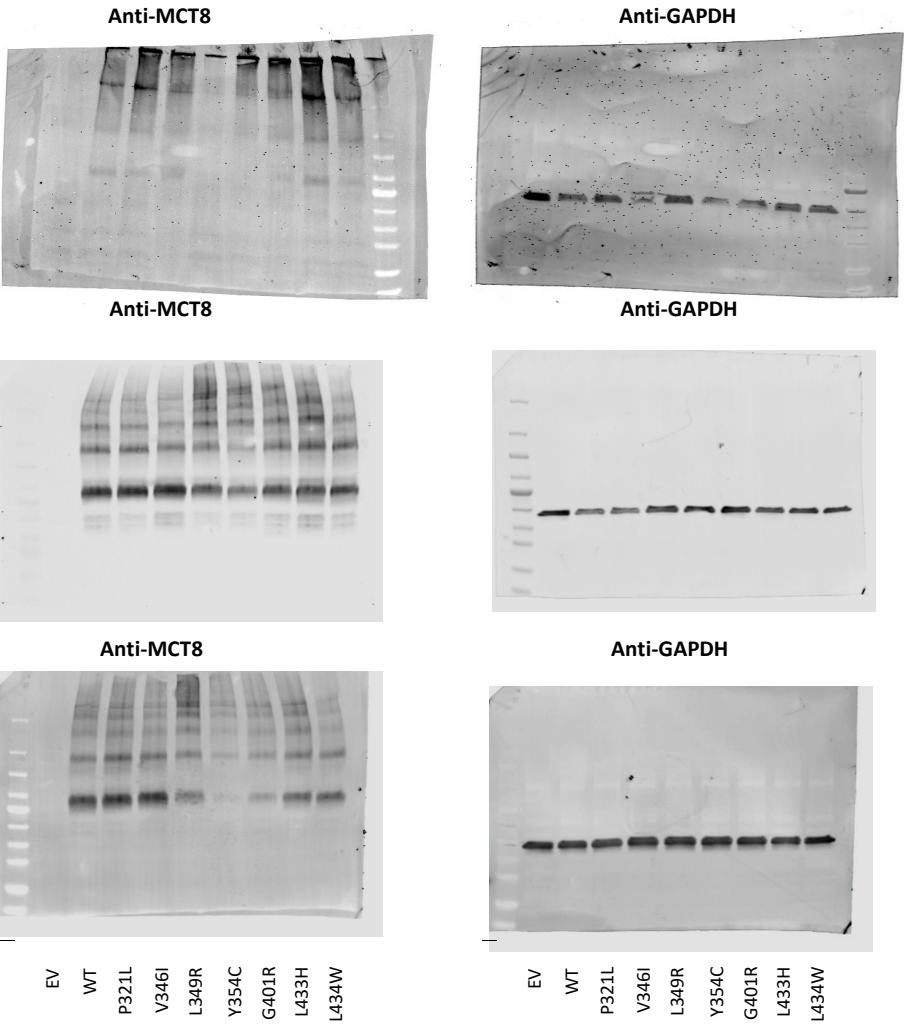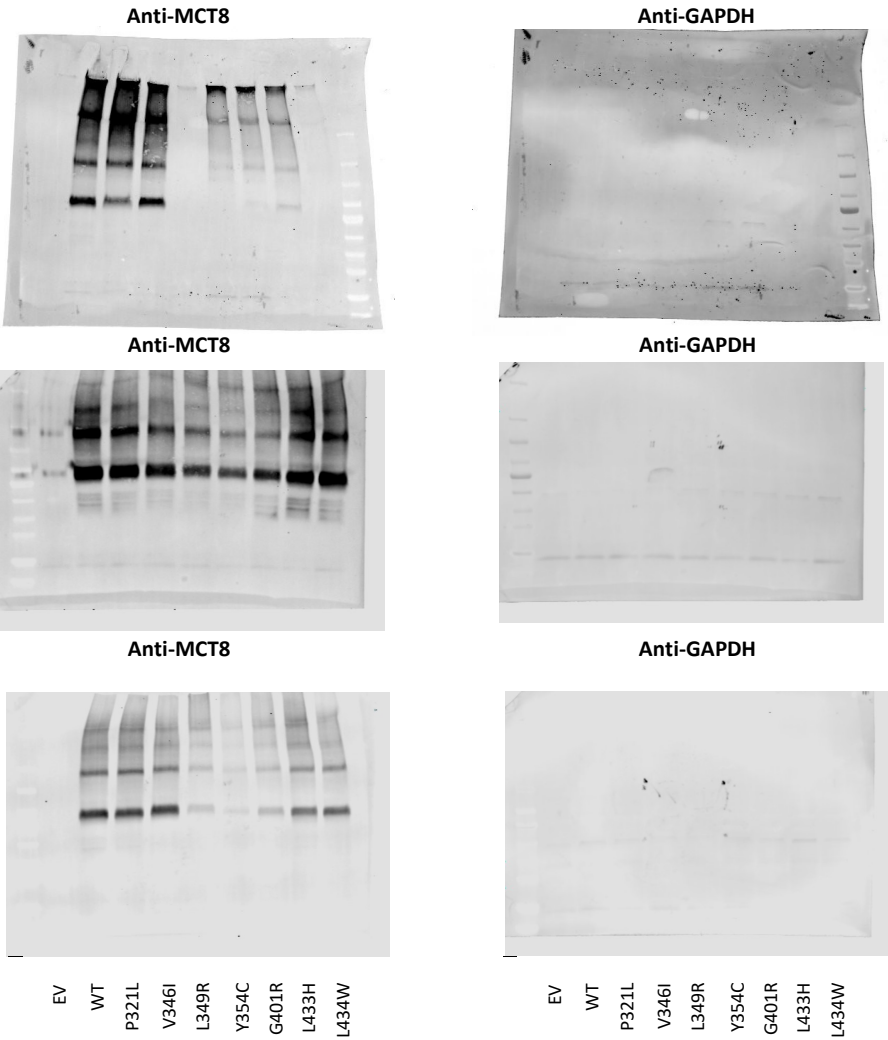

Series 6

Total lysate

N=1

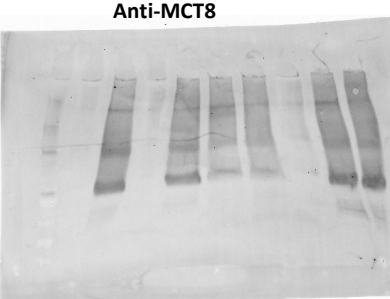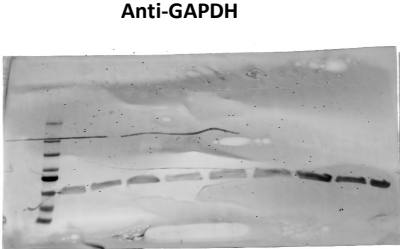

N=2

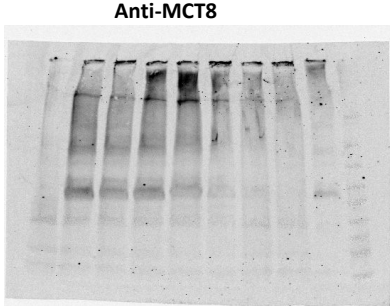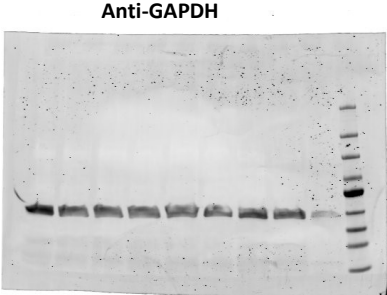

N=3

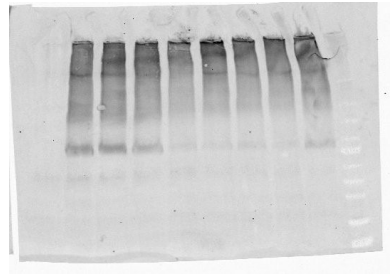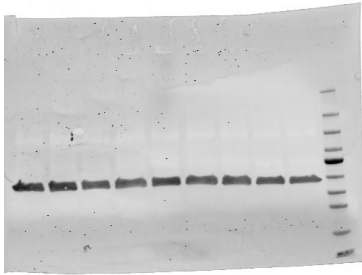

EV  
WT  
R445C  
R445L  
R445S  
D453V  
L469P  
L471P  
S441L

EV  
WT  
R445C  
R445L  
R445S  
D453V  
L469P  
L471P  
S441L

Surface

N=1

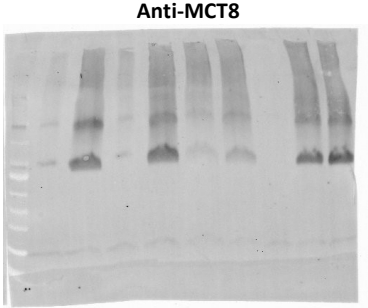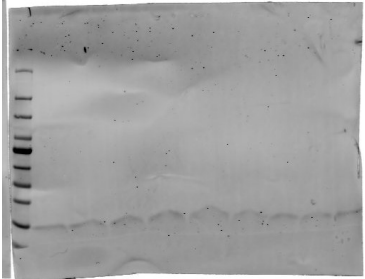

N=2

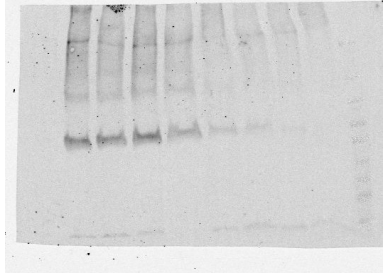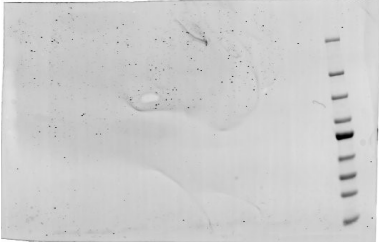

N=3

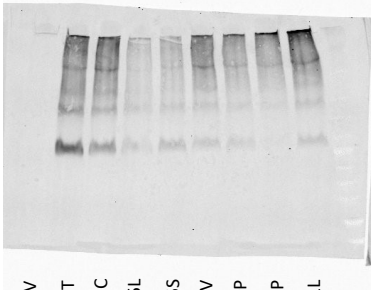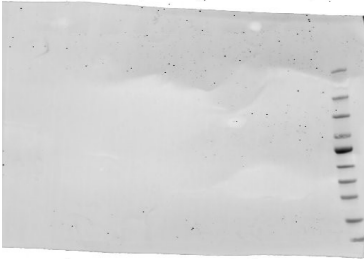

EV  
WT  
R445C  
R445L  
R445S  
D453V  
L469P  
L471P  
S441L

EV  
WT  
R445C  
R445L  
R445S  
D453V  
L469P  
L471P  
S441L



Series 7

Total lysate

Anti-MCT8

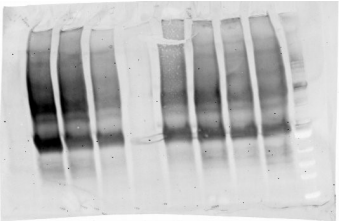

Anti-GAPDH

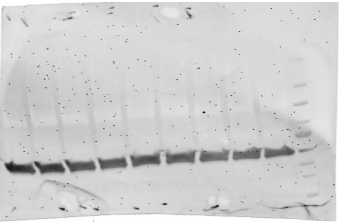

Anti-MCT8

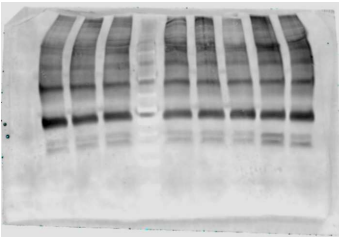

Anti-GAPDH

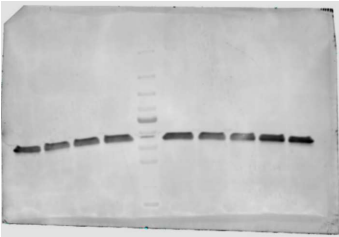

Anti-MCT8

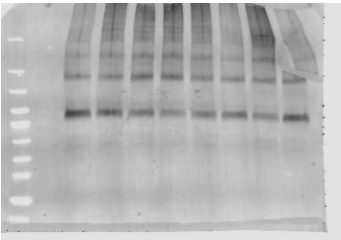

Anti-GAPDH

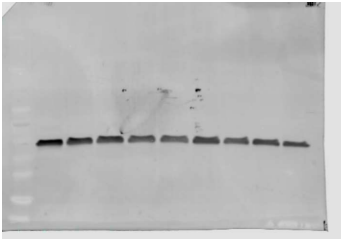

EV  
WT  
C491Y  
L492P  
L494P  
G495A  
D498N  
G499D  
F501del

EV  
WT  
C491Y  
L492P  
L494P  
G495A  
D498N  
G499D  
F501del

Surface

Anti-MCT8

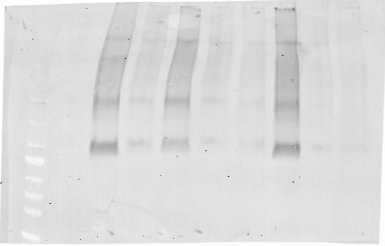

Anti-GAPDH

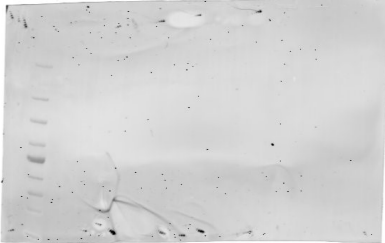

Anti-MCT8

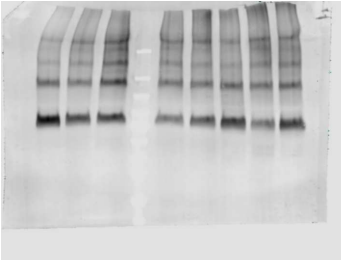

Anti-GAPDH

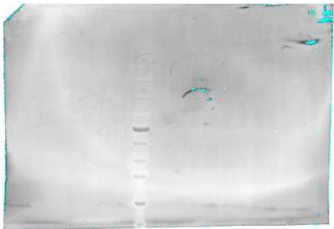

Anti-MCT8

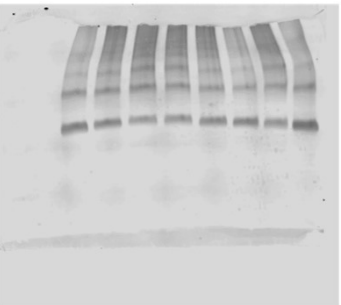

Anti-GAPDH

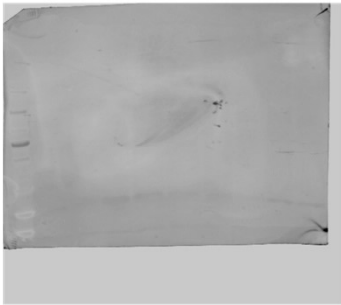

EV  
WT  
C491Y  
L492P  
L494P  
G495A  
D498N  
G499D  
F501del

EV  
WT  
C491Y  
L492P  
L494P  
G495A  
D498N  
G499D  
F501del



Series 8

Total lysate

Anti-MCT8

Anti-GAPDH

N=1

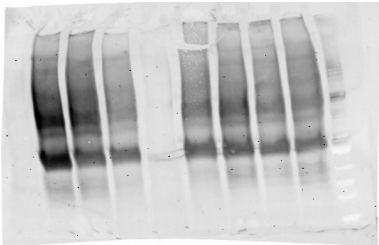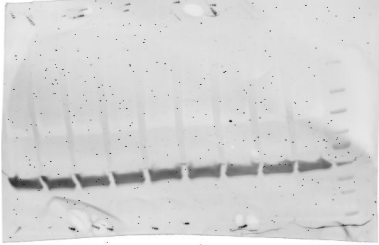

Anti-MCT8

Anti-GAPDH

N=2

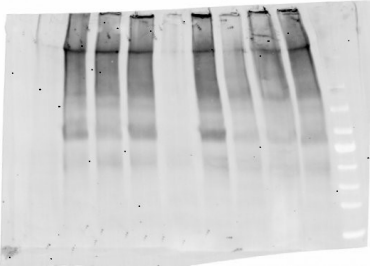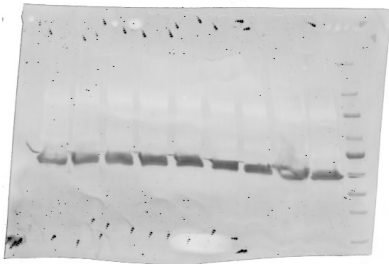

Anti-MCT8

Anti-GAPDH

N=3

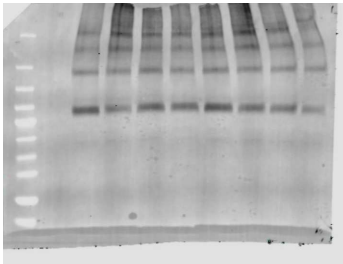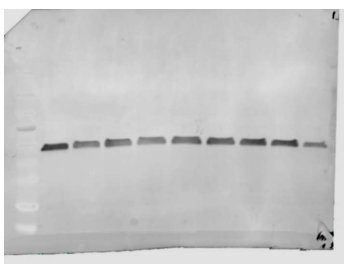

EV WT L512P G527S P537 L G541C L543P A553 F554Q del

EV WT L512P G527S P537 L G541C L543P A553 F554Q del

Surface

Anti-MCT8

Anti-GAPDH

N=1

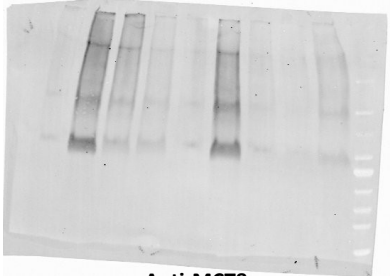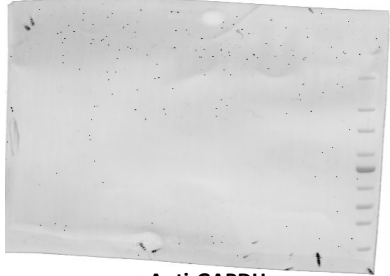

Anti-MCT8

Anti-GAPDH

N=2

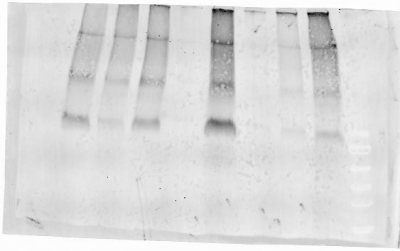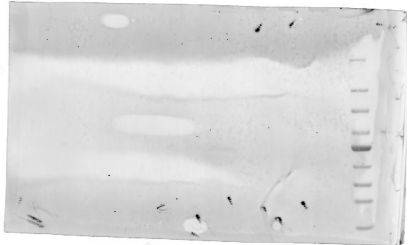

Anti-MCT8

Anti-GAPDH

N=3

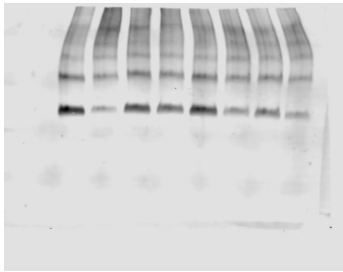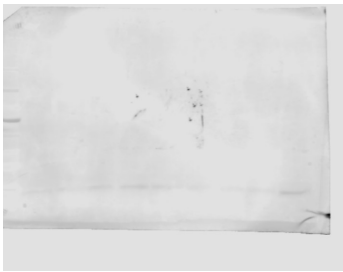

EV WT L512P G527S P537 L G541C L543P A553 F554Q del

EV WT L512P G527S P537 L G541C L543P A553 F554Q del

Series 9

Total lysate

Anti-MCT8

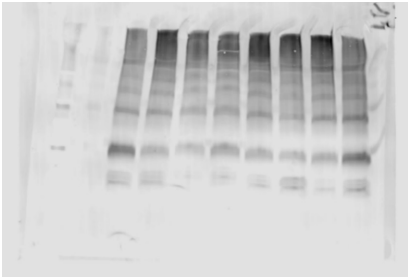

Anti-GAPDH

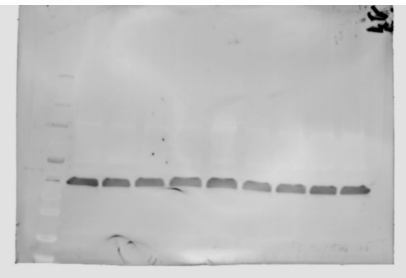

Anti-MCT8

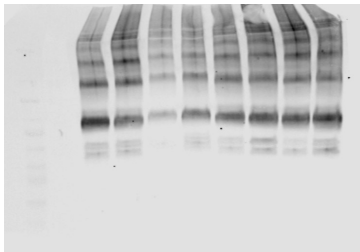

Anti-GAPDH

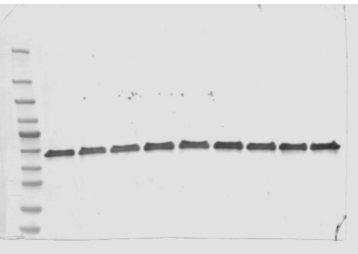

Anti-MCT8

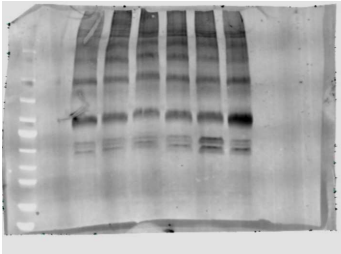

Anti-GAPDH

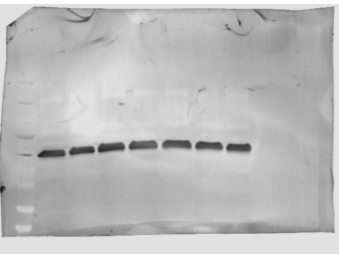

Surface

Anti-MCT8

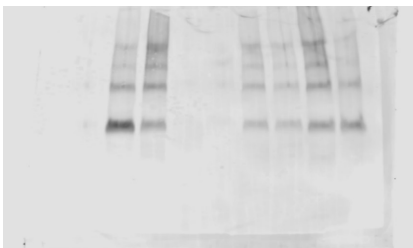

Anti-GAPDH

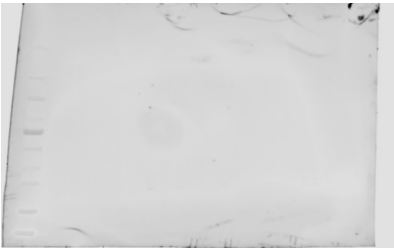

Anti-MCT8

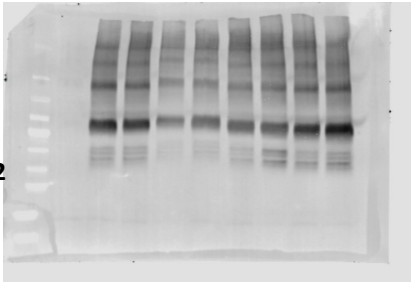

Anti-GAPDH

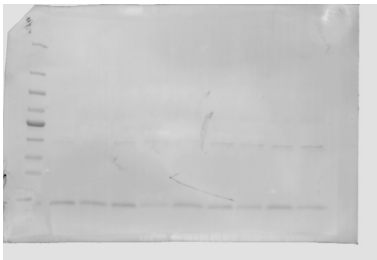

Anti-MCT8

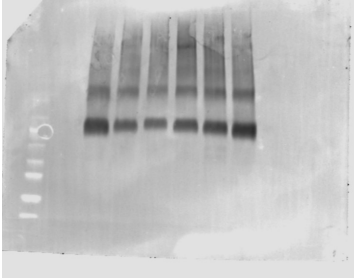

Anti-GAPDH

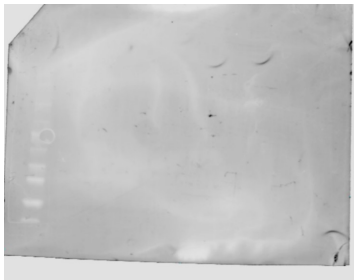

Series 10

Total lysate

N=1

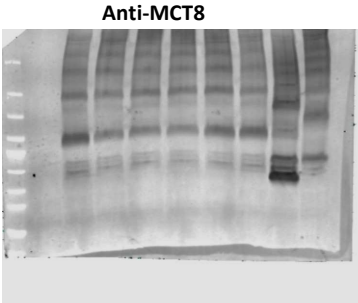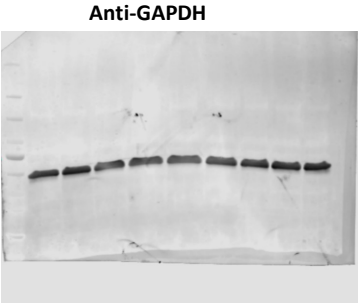

N=2

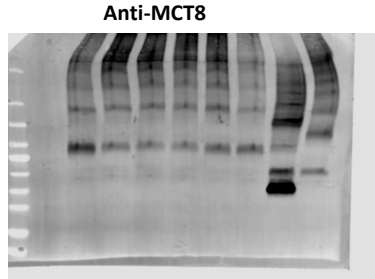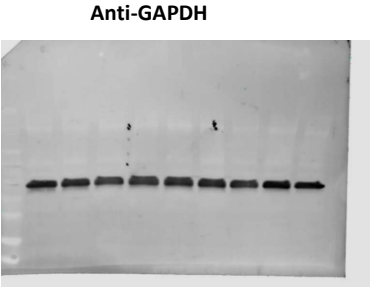

N=3

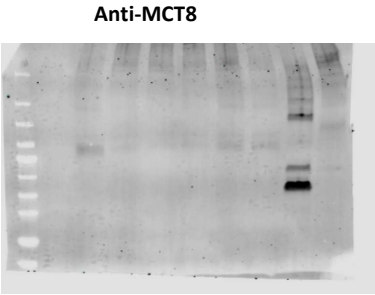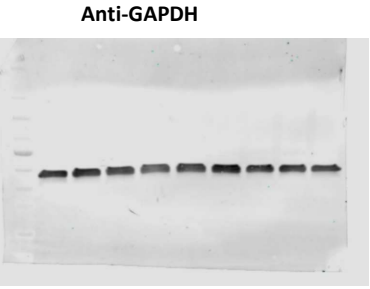

EV  
WT  
C283Y  
G312R  
W398R  
A252P  
R245X  
R388X

EV  
WT  
C283Y  
G312R  
W398R  
A252P  
R245X  
R388X

Surface

N=1

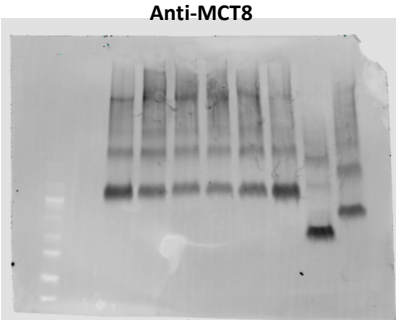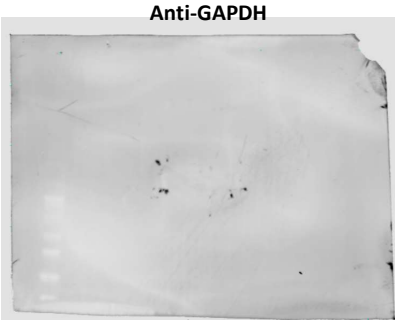

N=2

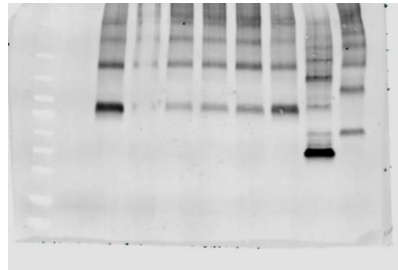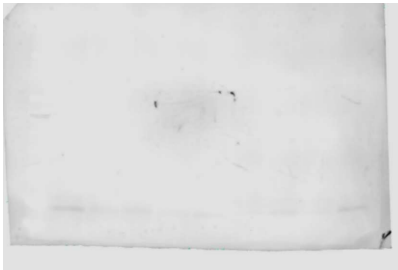

N=3

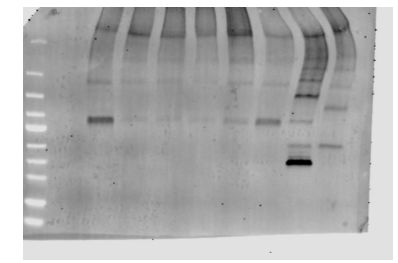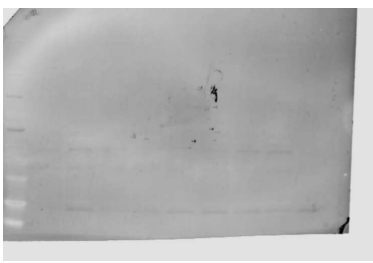

EV  
WT  
C283Y  
G312R  
W398R  
A252P  
R245X  
R388X

EV  
WT  
C283Y  
G312R  
W398R  
A252P  
R245X  
R388X

Series 11

Total lysate

Anti-MCT8

Anti-GAPDH

N=1

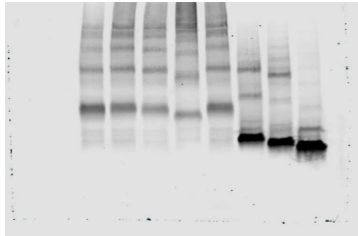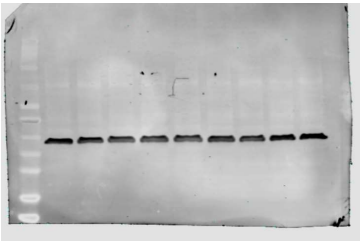

Anti-MCT8

Anti-GAPDH

N=2

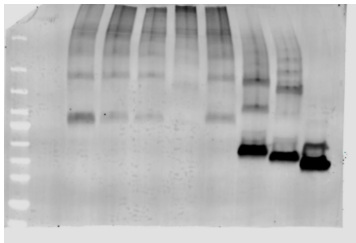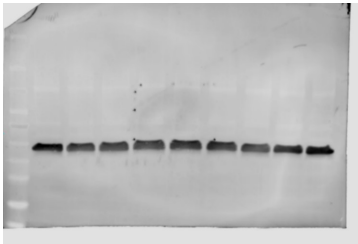

Anti-MCT8

Anti-GAPDH

N=3

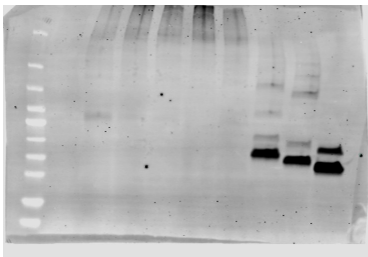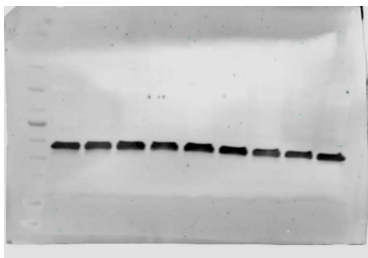

EV  
WT  
G536R  
P538del  
Y550Sfs556X  
P561del  
A252Gfs315X  
A252Lfs268X  
Q212X

EV  
WT  
G536R  
P538del  
Y550Sfs556X  
P561del  
A252Gfs315X  
A252Lfs268X  
Q212X

Surface

Anti-MCT8

Anti-GAPDH

N=1

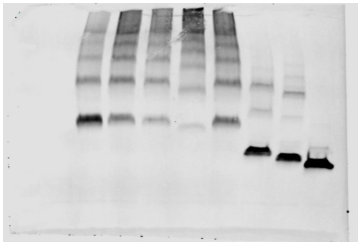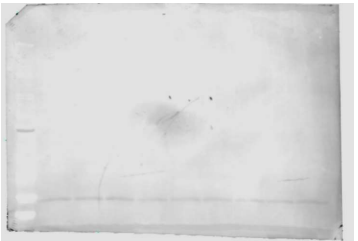

Anti-MCT8

Anti-GAPDH

N=2

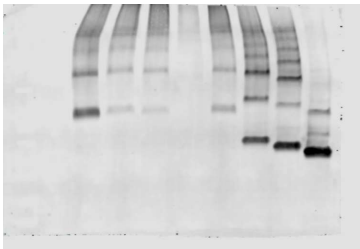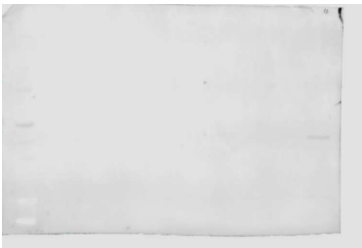

Anti-MCT8

Anti-GAPDH

N=3

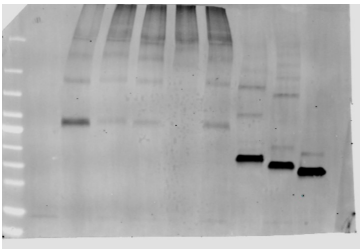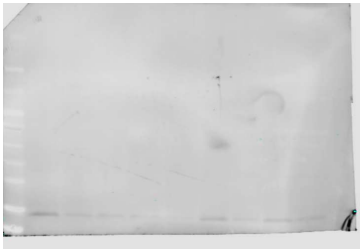

EV  
WT  
G536R  
P538del  
Y550Sfs556X  
P561del  
A252Gfs315X  
A252Lfs268X  
Q212X

EV  
WT  
G536R  
P538del  
Y550Sfs556X  
P561del  
A252Gfs315X  
A252Lfs268X  
Q212X

Series 12

Total lysate

Anti-MCT8

Anti-GAPDH

Surface

Anti-MCT8

Anti-GAPDH

N=1

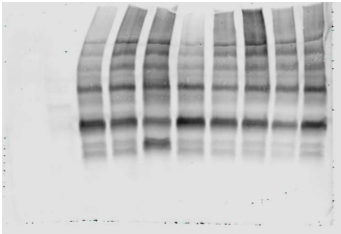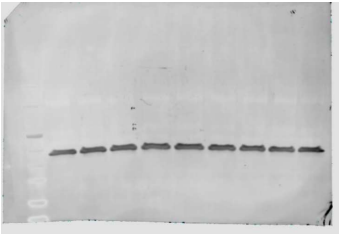

N=1

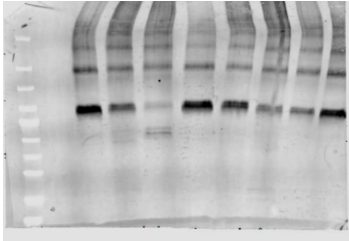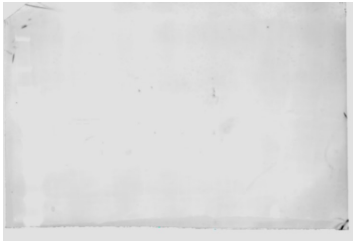

N=2

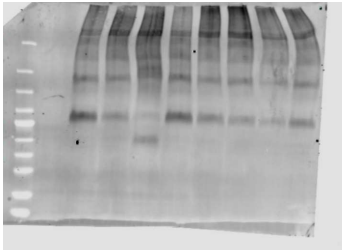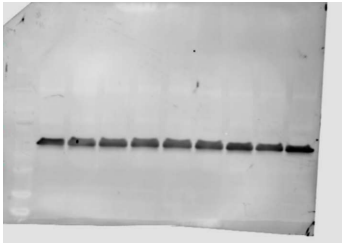

N=2

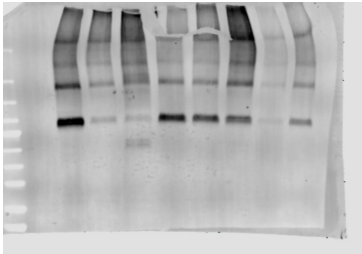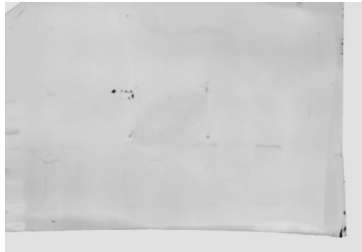

N=3

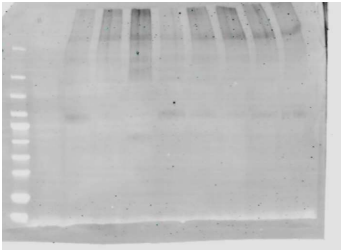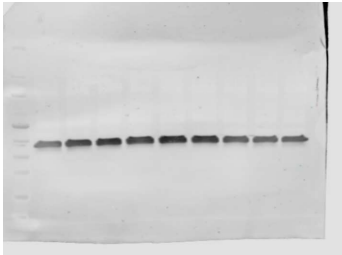

N=3

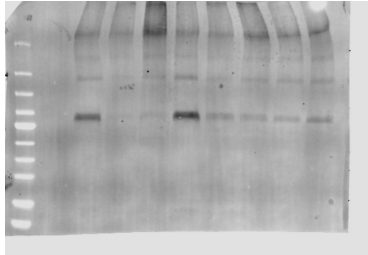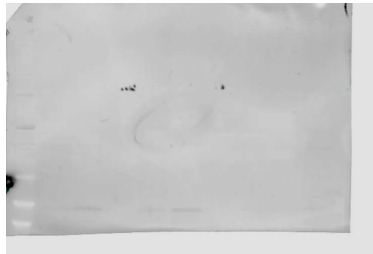

EV  
WT  
189insl  
236insV  
R271S  
S313R  
dupVHL  
G401E  
S441P

EV  
WT  
189insl  
236insV  
R271S  
S313R  
dupVHL  
G401E  
S441P

EV  
WT  
189insl  
236insV  
R271S  
S313R  
dupVHL  
G401E  
S441P

EV  
WT  
189insl  
236insV  
R271S  
S313R  
dupVHL  
G401E  
S441P

Series 13

Total lysate

N=1

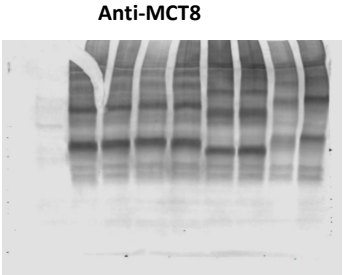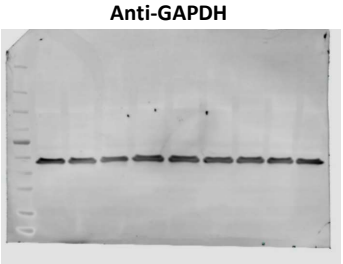

N=2

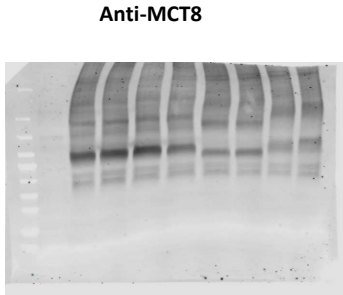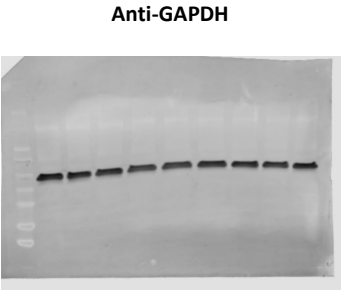

N=3

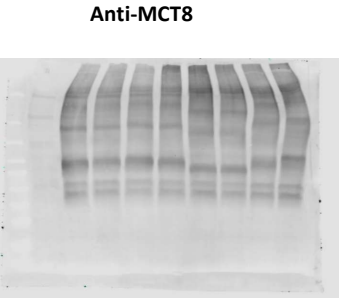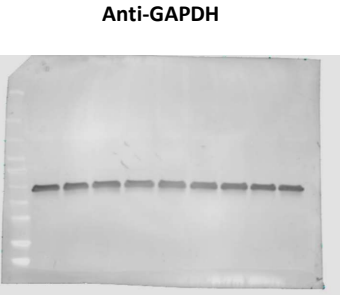

EV  
WT  
D453N  
L471R  
S519L  
I539Hfs590X  
I562Hfs590X  
P609Lfs679X  
P612Qfs679X

EV  
WT  
D453N  
L471R  
S519L  
I539Hfs590X  
I562Hfs590X  
P609Lfs679X  
P612Qfs679X

Surface

N=1

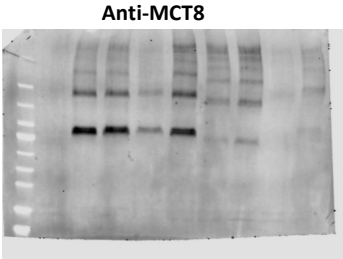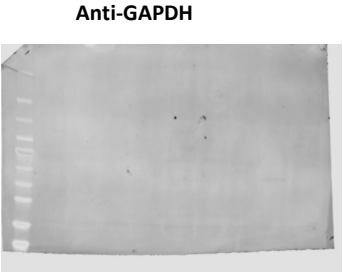

N=2

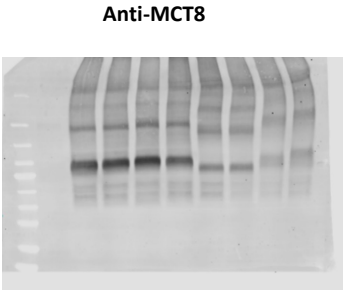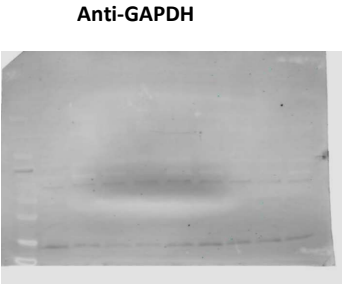

N=3

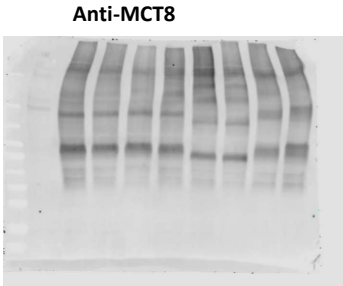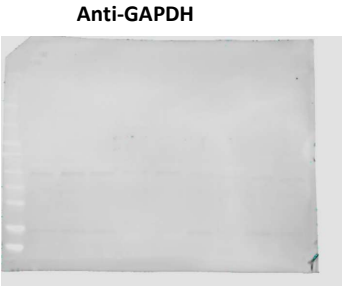

EV  
WT  
D453N  
L471R  
S519L  
I539Hfs590X  
I562Hfs590X  
P609Lfs679X  
P612Qfs679X

EV  
WT  
D453N  
L471R  
S519L  
I539Hfs590X  
I562Hfs590X  
P609Lfs679X  
P612Qfs679X



Series 14

Total lysate

Surface

N=1

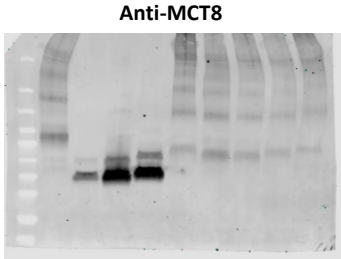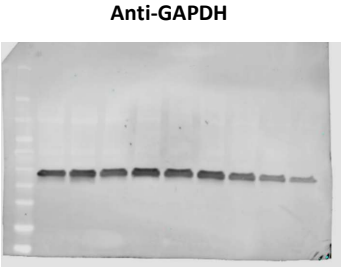

N=1

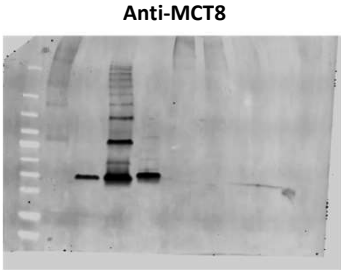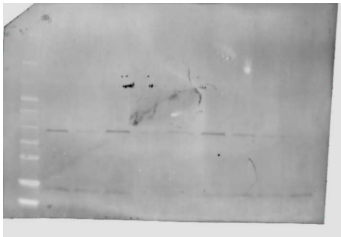

N=2

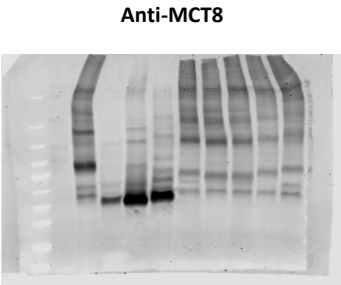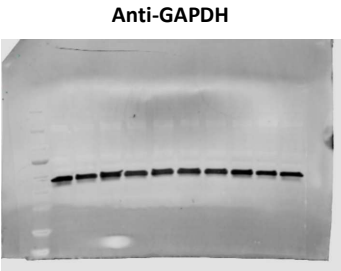

N=2

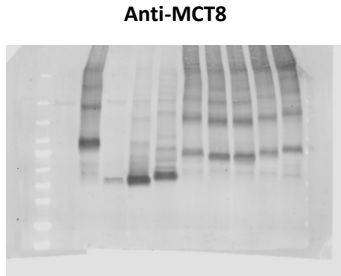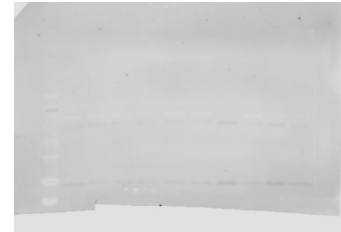

N=3

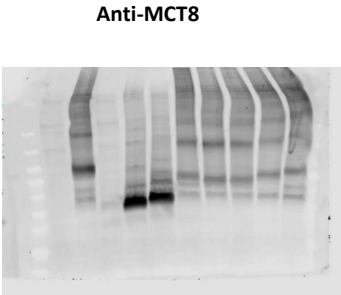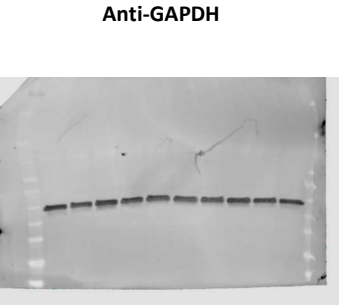

N=3

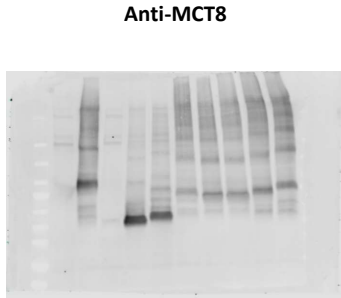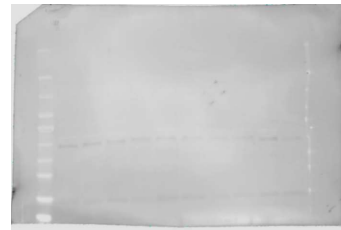

EV  
WT  
Y199Sfs203X  
F189Lfs203X  
N210Kfs240X  
S367Qfs400X  
S441X  
S448X  
A506Hfs525X  
Q520Hfs591X

EV  
WT  
Y199Sfs203X  
F189Lfs203X  
N210Kfs240X  
S367Qfs400X  
S441X  
S448X  
A506Hfs525X  
Q520Hfs591X

EV  
WT  
Y199Sfs203X  
F189Lfs203X  
N210Kfs240X  
S367Qfs400X  
S441X  
S448X  
A506Hfs525X  
Q520Hfs591X

EV  
WT  
Y199Sfs203X  
F189Lfs203X  
N210Kfs240X  
S367Qfs400X  
S441X  
S448X  
A506Hfs525X  
Q520Hfs591X



Series 15

Total lysate

N=1

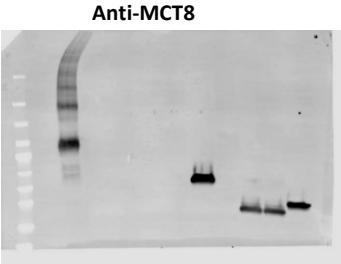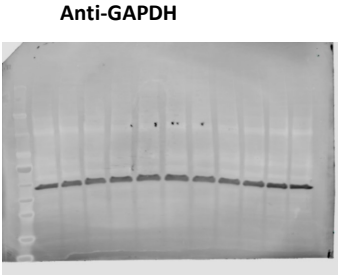

N=2

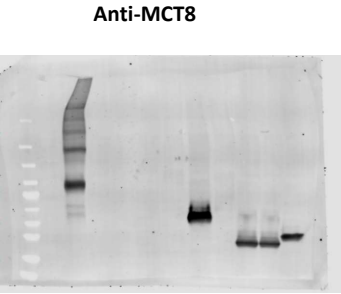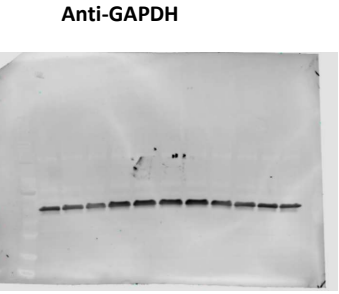

N=3

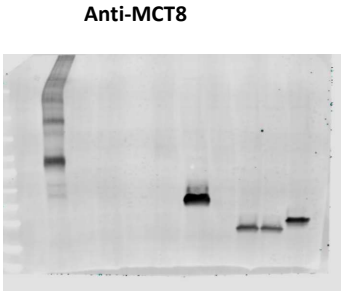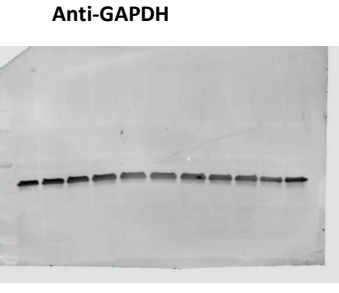

EV  
WT  
Q97X  
E114X  
E128X  
W89Gfs143X  
E170Rfs194X  
Q97Rfs156X  
E116Sfs156X  
V118Cfs156X  
P123Afs193X

EV  
WT  
Q97X  
E114X  
E128X  
W89Gfs143X  
E170Rfs194X  
Q97Rfs156X  
E116Sfs156X  
V118Cfs156X  
P123Afs193X

Surface

N=1

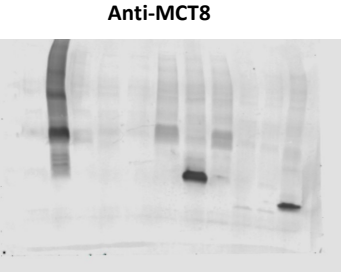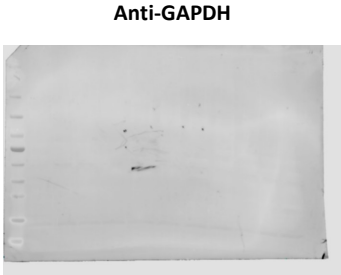

N=2

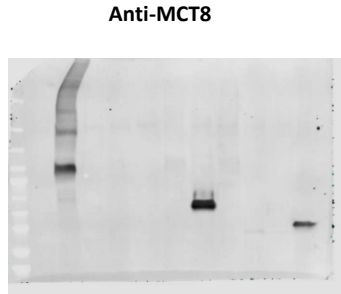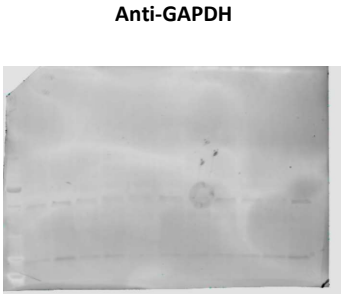

N=3

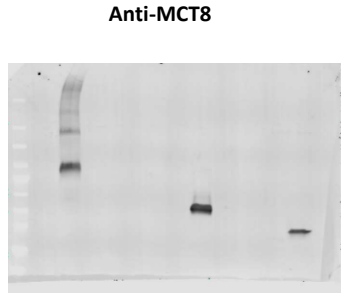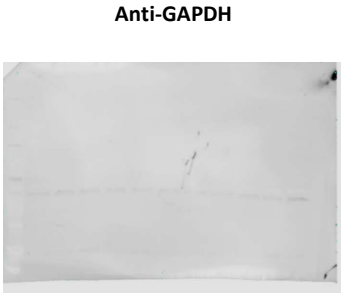

EV  
WT  
Q97X  
E114X  
E128X  
W89Gfs143X  
E170Rfs194X  
Q97Rfs156X  
E116Sfs156X  
V118Cfs156X  
P123Afs193X

EV  
WT  
Q97X  
E114X  
E128X  
W89Gfs143X  
E170Rfs194X  
Q97Rfs156X  
E116Sfs156X  
V118Cfs156X  
P123Afs193X

Series 16

Total lysate

Surface

N=1

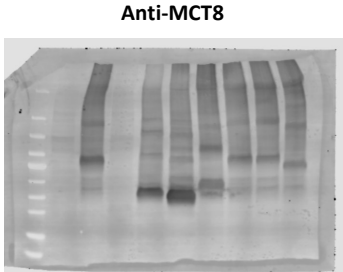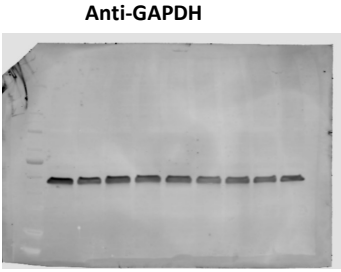

N=1

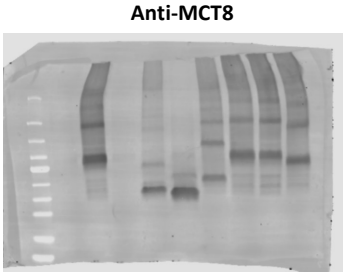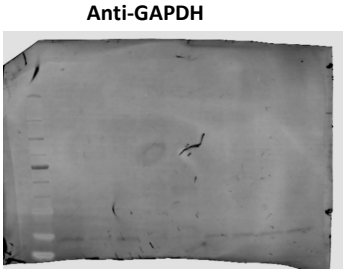

N=2

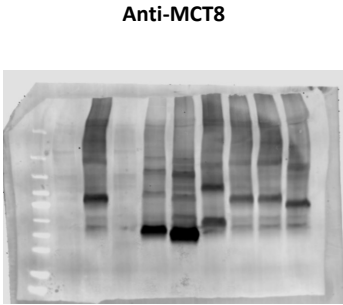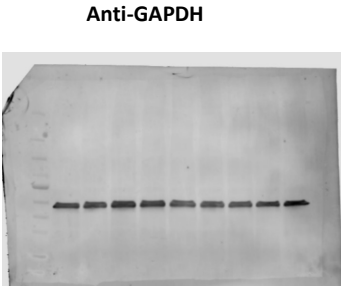

N=2

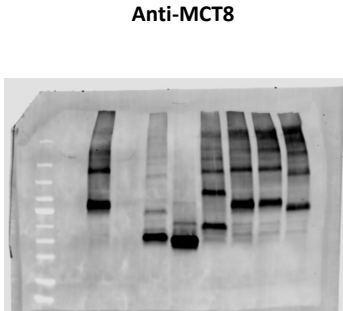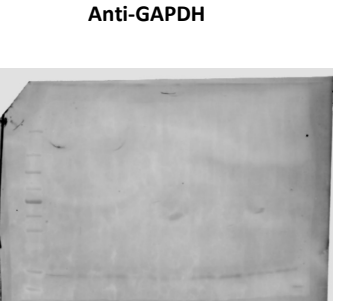

N=3

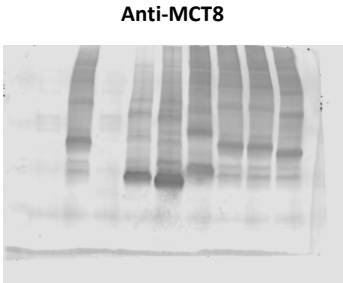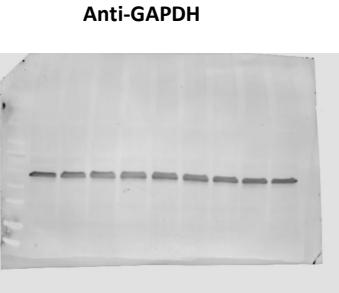

N=3

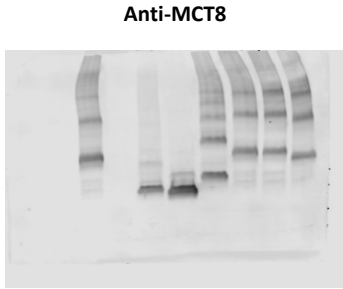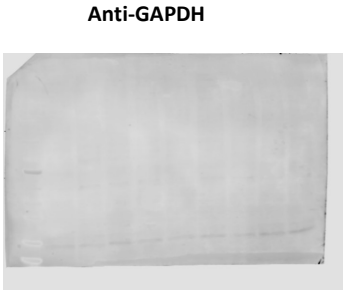

EV  
WT  
E142X  
S194Cfs240X  
E214X  
Y275Tfs341X  
G449D  
L487R+V489D  
V566Lfs587X

EV  
WT  
E142X  
S194Cfs240X  
E214X  
Y275Tfs341X  
G449D  
L487R+V489D  
V566Lfs587X

EV  
WT  
E142X  
S194Cfs240X  
E214X  
Y275Tfs341X  
G449D  
L487R+V489D  
V566Lfs587X

EV  
WT  
E142X  
S194Cfs240X  
E214X  
Y275Tfs341X  
G449D  
L487R+V489D  
V566Lfs587X

### Anti-MCT8

Input

surface

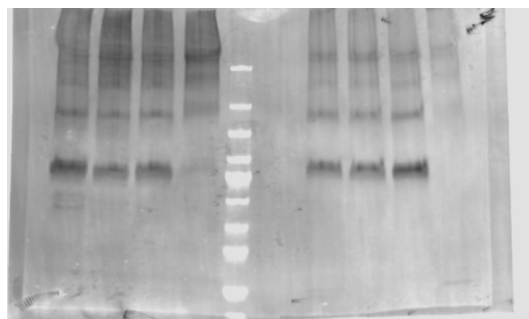

WT  
N193I  
N193A

EV  
WT  
N193I  
N193A

### Anti-GAPDH

Input

surface

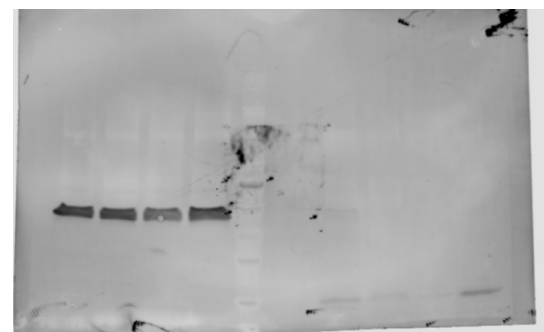

WT  
N193I  
N193A

EV  
WT  
N193I  
N193A
